# Supplementary material for: Vitamin B12 Status before and after Outpatient Treatment of Severe Acute Malnutrition in Children Aged 6–59 Months: A Sub-Study of a Randomized Controlled Trial in Burkina Faso
Source: MDPI journal article supplement (doi:10.3390/nu15163496), 2023-08-08
Supplement: s1 [file s1]

| id | study | dosage   | sex    | age_adm  | age_exit | age_cat_a | age_cat_e | breastf_ad |
|----|-------|----------|--------|----------|----------|-----------|-----------|------------|
| 1  | No    | Reduced  | Male   | 10.11827 | 10.80815 | < 12mo    | < 12mo    | Yes        |
| 2  | No    | Reduced  | Female | 16       | 18       | >=12mo    | >=12mo    | Yes        |
| 3  | No    | Standard | Female | 6.406045 | 10.08541 | < 12mo    | < 12mo    | Yes        |
| 4  | Yes   | Reduced  | Male   | 14.159   | 17.83837 | >=12mo    | >=12mo    | Yes        |
| 5  | No    | Standard | Male   | 9.36268  | 13.04205 | < 12mo    | >=12mo    | Yes        |
| 6  | No    | Standard | Male   | 6.471748 | 9.461235 | < 12mo    | < 12mo    | Yes        |
| 7  | No    | Reduced  | Female | 13.10775 | 14.71748 | >=12mo    | >=12mo    | Yes        |
| 8  | No    | Standard | Female | 13.30486 | 16.98423 | >=12mo    | >=12mo    | Yes        |
| 9  | No    | Standard | Male   | 14       | 14       | >=12mo    | >=12mo    | Yes        |
| 10 | No    | Reduced  | Female | 6.208936 | 9.888305 | < 12mo    | < 12mo    | Yes        |
| 11 | No    | Reduced  | Female | 24       | 26       | >=12mo    | >=12mo    | No         |
| 12 | No    | Reduced  | Male   | 24       | 28       | >=12mo    | >=12mo    | Yes        |
| 13 | Yes   | Standard | Male   | 6        | 10       | < 12mo    | < 12mo    | Yes        |
| 14 | No    | Reduced  | Female | 23.02891 | 23.94875 | >=12mo    | >=12mo    | No         |
| 15 | No    | Standard | Female | 29       | 31       | >=12mo    | >=12mo    | No         |
| 16 | No    | Standard | Female | 22.79895 | 23.71879 | >=12mo    | >=12mo    | No         |
| 17 | No    | Reduced  | Male   | 36       | 38       | >=12mo    | >=12mo    | No         |
| 18 | No    | Reduced  | Female | 8.935611 | 10.54534 | < 12mo    | < 12mo    | Yes        |
| 19 | No    | Standard | Female | 25.49277 | 27.56242 | >=12mo    | >=12mo    | Yes        |
| 20 | No    | Standard | Female | 19       | 20       | >=12mo    | >=12mo    | No         |
| 21 | No    | Standard | Male   | 18.5611  | 19.94087 | >=12mo    | >=12mo    | No         |
| 22 | Yes   | Reduced  | Male   | 8        | 9        | < 12mo    | < 12mo    | Yes        |
| 23 | Yes   | Standard | Male   | 21.71485 | 23.32457 | >=12mo    | >=12mo    | Yes        |
| 24 | No    | Reduced  | Male   | 6.208936 | 9.658344 | < 12mo    | < 12mo    | Yes        |
| 25 | No    | Standard | Female | 12.54928 | 13.46912 | >=12mo    | >=12mo    | Yes        |
| 26 | Yes   | Standard | Male   | 10.47963 | 12.54928 | < 12mo    | >=12mo    | Yes        |
| 27 | Yes   | Reduced  | Male   | 25.0657  | 28.28515 | >=12mo    | >=12mo    | Yes        |
| 28 | Yes   | Standard | Male   | 33.6728  | 34.59264 | >=12mo    | >=12mo    | No         |
| 29 | Yes   | Reduced  | Female | 28.84363 | 30.45335 | >=12mo    | >=12mo    | No         |
| 30 | Yes   | Reduced  | Female | 6.636005 | 10.31537 | < 12mo    | < 12mo    | Yes        |
| 31 | Yes   | Reduced  | Male   | 13.37057 | 14.29041 | >=12mo    | >=12mo    | Yes        |
| 32 | No    | Standard | Male   | 6.931669 | 10.61104 | < 12mo    | < 12mo    | Yes        |
| 33 | Yes   | Standard | Female | 20.69645 | 22.53614 | >=12mo    | >=12mo    | No         |
| 34 | Yes   | Reduced  | Female | 34.42838 | 36.72799 | >=12mo    | >=12mo    | No         |
| 35 | Yes   | Reduced  | Male   | 9.264126 | 11.56373 | < 12mo    | < 12mo    | Yes        |
| 36 | Yes   | Standard | Female | 22.07622 | 22.7661  | >=12mo    | >=12mo    | Yes        |
| 37 | Yes   | Standard | Female | 16.2615  | 17.87122 | >=12mo    | >=12mo    | Yes        |
| 38 | Yes   | Standard | Female | 18.75821 | 21.51774 | >=12mo    | >=12mo    | Yes        |
| 39 | Yes   | Reduced  | Male   | 13.1406  | 15.21025 | >=12mo    | >=12mo    | Yes        |
| 40 | Yes   | Reduced  | Male   | 11.49803 | 15.1774  | < 12mo    | >=12mo    | Yes        |
| 41 | Yes   | Reduced  | Male   | 16.62286 | 17.31275 | >=12mo    | >=12mo    | No         |
| 42 | Yes   | Standard | Female | 17.87122 | 19.02103 | >=12mo    | >=12mo    | Yes        |
| 43 | No    | Standard | Female | 6        | 10       | < 12mo    | < 12mo    | Yes        |
| 44 | No    | Standard | Female | 19.31669 | 21.6163  | >=12mo    | >=12mo    | No         |
| 45 | No    | Standard | Female | 6.767411 | 8.837056 | < 12mo    | < 12mo    | Yes        |
| 46 | Yes   | Reduced  | Female | 17       | 17       | >=12mo    | >=12mo    | No         |
| 47 | Yes   | Standard | Female | 11.53088 | 15.21025 | < 12mo    | >=12mo    | Yes        |
| 48 | Yes   | Reduced  | Male   | 18.39685 | 20.46649 | >=12mo    | >=12mo    | Yes        |
| 49 | Yes   | Standard | Male   | 33       | 37       | >=12mo    | >=12mo    | No         |
| 50 | Yes   | Standard | Male   | 40.70302 | 41.62286 | >=12mo    | >=12mo    | No         |

|     |     |          |        |          |          |        |        |     |
|-----|-----|----------|--------|----------|----------|--------|--------|-----|
| 51  | Yes | Reduced  | Male   | 19.21813 | 20.36794 | >=12mo | >=12mo | Yes |
| 52  | Yes | Reduced  | Male   | 13.17346 | 14.55322 | >=12mo | >=12mo | Yes |
| 53  | Yes | Reduced  | Male   | 24.34297 | 25.49277 | >=12mo | >=12mo | Yes |
| 54  | No  | Reduced  | Female | 7.654402 | 9.494086 | < 12mo | < 12mo | Yes |
| 55  | Yes | Standard | Male   | 6.73456  | 9.264126 | < 12mo | < 12mo | Yes |
| 56  | Yes | Standard | Female | 16.95138 | 20.63075 | >=12mo | >=12mo | Yes |
| 57  | No  | Reduced  | Male   | 6.340342 | 7.720105 | < 12mo | < 12mo | Yes |
| 58  | Yes | Standard | Female | 58       | 62       | >=12mo | >=12mo | No  |
| 59  | No  | Reduced  | Male   | 8.311432 | 8.541393 | < 12mo | < 12mo | Yes |
| 60  | No  | Standard | Female | 16.78712 | 19.77661 | >=12mo | >=12mo | Yes |
| 61  | Yes | Reduced  | Male   | 9.691196 | 13.37057 | < 12mo | >=12mo | Yes |
| 62  | Yes | Standard | Male   | 6.208936 | 9.888305 | < 12mo | < 12mo | Yes |
| 63  | No  | Reduced  | Female | 16.06439 | 19.74376 | >=12mo | >=12mo | Yes |
| 64  | Yes | Reduced  | Male   | 24.57293 | 25.03285 | >=12mo | >=12mo | No  |
| 65  | No  | Standard | Female | 11       | 15       | < 12mo | >=12mo | Yes |
| 66  | No  | Standard | Female | 29       | 32       | >=12mo | >=12mo | No  |
| 67  | Yes | Standard | Female | 9        | 10       | < 12mo | < 12mo | Yes |
| 68  | No  | Reduced  | Female | 6.143233 | 9.822602 | < 12mo | < 12mo | Yes |
| 69  | Yes | Reduced  | Female | 9.13272  | 10.05256 | < 12mo | < 12mo | Yes |
| 70  | Yes | Standard | Male   | 18.69251 | 19.61235 | >=12mo | >=12mo | Yes |
| 71  | Yes | Reduced  | Female | 9.067018 | 12.0565  | < 12mo | >=12mo | Yes |
| 72  | Yes | Standard | Female | 15.99869 | 17.83837 | >=12mo | >=12mo | Yes |
| 73  | Yes | Reduced  | Female | 9.36268  | 10.9724  | < 12mo | < 12mo | Yes |
| 74  | Yes | Standard | Male   | 17.14849 | 17.83837 | >=12mo | >=12mo | Yes |
| 75  | Yes | Reduced  | Male   | 9.494086 | 13.17346 | < 12mo | >=12mo | Yes |
| 76  | No  | Reduced  | Female | 6.471748 | 9.921156 | < 12mo | < 12mo | Yes |
| 77  | Yes | Reduced  | Female | 11.20237 | 14.88174 | < 12mo | >=12mo | Yes |
| 78  | No  | Reduced  | Male   | 22.30618 | 25.0657  | >=12mo | >=12mo | Yes |
| 79  | Yes | Standard | Female | 10.18397 | 11.79369 | < 12mo | < 12mo | Yes |
| 80  | Yes | Standard | Female | 21.12352 | 22.50328 | >=12mo | >=12mo | Yes |
| 81  | No  | Standard | Male   | 18.62681 | 19.31669 | >=12mo | >=12mo | Yes |
| 82  | No  | Standard | Male   | 7.358738 | 11.03811 | < 12mo | < 12mo | Yes |
| 83  | No  | Reduced  | Male   | 8.04862  | 9.428384 | < 12mo | < 12mo | Yes |
| 84  | No  | Reduced  | Female | 6.471748 | 9.231275 | < 12mo | < 12mo | Yes |
| 85  | No  | Reduced  | Female | 6.931669 | 10.15112 | < 12mo | < 12mo | Yes |
| 86  | No  | Reduced  | Female | 14.55322 | 18.23259 | >=12mo | >=12mo | Yes |
| 87  | No  | Standard | Male   | 6        | 10       | < 12mo | < 12mo | Yes |
| 88  | No  | Standard | Male   | 11.9251  | 14.45467 | < 12mo | >=12mo | Yes |
| 89  | No  | Standard | Male   | 6.340342 | 8.180026 | < 12mo | < 12mo | Yes |
| 90  | No  | Reduced  | Female | 7.194481 | 10.87385 | < 12mo | < 12mo | Yes |
| 91  | No  | Standard | Female | 6.997372 | 8.147175 | < 12mo | < 12mo | Yes |
| 92  | Yes | Reduced  | Male   | 12.02365 | 12.9435  | >=12mo | >=12mo | Yes |
| 93  | Yes | Standard | Male   | 12.87779 | 14.0276  | >=12mo | >=12mo | Yes |
| 94  | No  | Standard | Male   | 25.42707 | 25.42707 | >=12mo | >=12mo | No  |
| 95  | Yes | Reduced  | Male   | 8.344284 | 9.954008 | < 12mo | < 12mo | Yes |
| 96  | No  | Standard | Female | 9.165571 | 10.08541 | < 12mo | < 12mo | Yes |
| 97  | No  | Reduced  | Male   | 21.18922 | 24.86859 | >=12mo | >=12mo | Yes |
| 98  | Yes | Reduced  | Male   | 11.66229 | 13.96189 | < 12mo | >=12mo | Yes |
| 99  | No  | Reduced  | Female | 37.38502 | 40.14455 | >=12mo | >=12mo | No  |
| 100 | No  | Standard | Female | 7.490145 | 10.47963 | < 12mo | < 12mo | Yes |
| 101 | Yes | Standard | Female | 6.570302 | 9.099869 | < 12mo | < 12mo | Yes |

|     |     |          |        |          |          |        |        |     |
|-----|-----|----------|--------|----------|----------|--------|--------|-----|
| 102 | No  | Reduced  | Male   | 6.30749  | 8.147175 | < 12mo | < 12mo | Yes |
| 103 | Yes | Reduced  | Female | 22       | 23       | >=12mo | >=12mo | Yes |
| 104 | Yes | Standard | Male   | 7.950066 | 9.099869 | < 12mo | < 12mo | Yes |
| 105 | No  | Reduced  | Male   | 9.13272  | 10.05256 | < 12mo | < 12mo | Yes |
| 106 | Yes | Standard | Female | 9.921156 | 10.841   | < 12mo | < 12mo | Yes |
| 107 | No  | Reduced  | Female | 6        | 9        | < 12mo | < 12mo | Yes |
| 108 | Yes | Standard | Male   | 6.143233 | 9.822602 | < 12mo | < 12mo | Yes |
| 109 | Yes | Standard | Male   | 6.208936 | 9.198423 | < 12mo | < 12mo | Yes |
| 110 | Yes | Reduced  | Female | 8.541393 | 11.07096 | < 12mo | < 12mo | Yes |
| 111 | Yes | Standard | Female | 8.607096 | 12.0565  | < 12mo | >=12mo | Yes |
| 112 | No  | Reduced  | Female | 6.110381 | 8.639948 | < 12mo | < 12mo | Yes |
| 113 | Yes | Standard | Female | 6.406045 | 10.08541 | < 12mo | < 12mo | Yes |
| 114 | No  | Standard | Female | 6.241787 | 7.621551 | < 12mo | < 12mo | Yes |
| 115 | Yes | Reduced  | Female | 6.208936 | 9.888305 | < 12mo | < 12mo | Yes |
| 116 | Yes | Standard | Male   | 6.274639 | 9.954008 | < 12mo | < 12mo | Yes |
| 117 | No  | Reduced  | Female | 6.537451 | 10.21682 | < 12mo | < 12mo | Yes |
| 118 | No  | Standard | Female | 6.143233 | 9.822602 | < 12mo | < 12mo | Yes |
| 119 | Yes | Reduced  | Female | 6.208936 | 9.888305 | < 12mo | < 12mo | Yes |
| 120 | Yes | Reduced  | Female | 6.504599 | 10.18397 | < 12mo | < 12mo | Yes |
| 121 | No  | Reduced  | Female | 6.208936 | 9.888305 | < 12mo | < 12mo | Yes |
| 122 | Yes | Reduced  | Male   | 6.110381 | 7.030223 | < 12mo | < 12mo | Yes |
| 123 | Yes | Standard | Male   | 7.39159  | 8.541393 | < 12mo | < 12mo | Yes |
| 124 | Yes | Standard | Male   | 6.274639 | 9.954008 | < 12mo | < 12mo | Yes |
| 125 | No  | Standard | Male   | 6.011827 | 7.851511 | < 12mo | < 12mo | Yes |
| 126 | No  | Standard | Female | 6        | 8        | < 12mo | < 12mo | Yes |
| 127 | No  | Reduced  | Female | 6.208936 | 9.658344 | < 12mo | < 12mo | Yes |
| 128 | Yes | Reduced  | Male   | 6.438896 | 9.428384 | < 12mo | < 12mo | Yes |
| 129 | No  | Standard | Male   | 16.06439 | 16.98423 | >=12mo | >=12mo | Yes |
| 130 | Yes | Reduced  | Female | 8.607096 | 10.44678 | < 12mo | < 12mo | Yes |
| 131 | Yes | Standard | Male   | 23.12746 | 26.11695 | >=12mo | >=12mo | Yes |
| 132 | No  | Reduced  | Female | 9.55979  | 12.54928 | < 12mo | >=12mo | Yes |
| 133 | No  | Standard | Male   | 6.997372 | 10.67674 | < 12mo | < 12mo | Yes |
| 134 | Yes | Reduced  | Male   | 20.5979  | 23.12746 | >=12mo | >=12mo | Yes |
| 135 | No  | Reduced  | Male   | 9.13272  | 10.05256 | < 12mo | < 12mo | Yes |
| 136 | Yes | Standard | Male   | 13.79764 | 16.09724 | >=12mo | >=12mo | Yes |
| 137 | Yes | Standard | Male   | 20.46649 | 22.7661  | >=12mo | >=12mo | Yes |
| 138 | Yes | Reduced  | Female | 6.636005 | 8.245729 | < 12mo | < 12mo | Yes |
| 139 | No  | Standard | Male   | 7.687254 | 11.36662 | < 12mo | < 12mo | Yes |
| 140 | No  | Standard | Male   | 14.81603 | 15.50591 | >=12mo | >=12mo | Yes |
| 141 | No  | Reduced  | Male   | 8.508541 | 10.34823 | < 12mo | < 12mo | Yes |
| 142 | Yes | Reduced  | Female | 6.274639 | 9.954008 | < 12mo | < 12mo | Yes |
| 143 | Yes | Standard | Male   | 9.986859 | 11.82654 | < 12mo | < 12mo | Yes |
| 144 | Yes | Standard | Female | 12       | 16       | >=12mo | >=12mo | Yes |
| 145 | No  | Reduced  | Female | 7.095926 | 10.08541 | < 12mo | < 12mo | Yes |
| 146 | No  | Reduced  | Female | 6.241787 | 9.691196 | < 12mo | < 12mo | Yes |
| 147 | Yes | Standard | Female | 6.373193 | 7.293036 | < 12mo | < 12mo | Yes |
| 148 | Yes | Reduced  | Female | 16.29435 | 16.75427 | >=12mo | >=12mo | Yes |
| 149 | No  | Reduced  | Female | 6.208936 | 9.198423 | < 12mo | < 12mo | Yes |
| 150 | No  | Reduced  | Male   | 7.161629 | 9.001314 | < 12mo | < 12mo | Yes |
| 151 | No  | Reduced  | Female | 6.110381 | 9.78975  | < 12mo | < 12mo | Yes |
| 152 | No  | Standard | Male   | 12.08936 | 12.77924 | >=12mo | >=12mo | Yes |

|     |     |          |        |          |          |        |        |     |
|-----|-----|----------|--------|----------|----------|--------|--------|-----|
| 153 | No  | Standard | Female | 7.095926 | 8.70565  | < 12mo | < 12mo | Yes |
| 154 | No  | Reduced  | Male   | 6.077529 | 9.756899 | < 12mo | < 12mo | Yes |
| 155 | No  | Standard | Female | 17.57556 | 18.95532 | >=12mo | >=12mo | No  |
| 156 | No  | Standard | Male   | 6.340342 | 10.01971 | < 12mo | < 12mo | Yes |
| 157 | No  | Reduced  | Female | 7.81866  | 11.49803 | < 12mo | < 12mo | Yes |
| 158 | No  | Reduced  | Male   | 12.87779 | 14.25756 | >=12mo | >=12mo | Yes |
| 159 | No  | Reduced  | Male   | 11.95795 | 13.33771 | < 12mo | >=12mo | Yes |
| 160 | No  | Standard | Male   | 15.80158 | 17.64126 | >=12mo | >=12mo | Yes |
| 161 | No  | Standard | Male   | 15.93298 | 16.62286 | >=12mo | >=12mo | Yes |
| 162 | No  | Standard | Female | 6.044678 | 7.884363 | < 12mo | < 12mo | Yes |
| 163 | No  | Standard | Male   | 25       | 25       | >=12mo | >=12mo | No  |
| 164 | No  | Reduced  | Female | 10.9067  | 13.89619 | < 12mo | >=12mo | Yes |
| 165 | No  | Standard | Male   | 6.931669 | 8.081471 | < 12mo | < 12mo | Yes |
| 166 | No  | Reduced  | Female | 16       | 18       | >=12mo | >=12mo | Yes |
| 167 | No  | Standard | Female | 8.70565  | 10.54534 | < 12mo | < 12mo | Yes |
| 168 | No  | Reduced  | Male   | 11.26807 | 12.87779 | < 12mo | >=12mo | Yes |
| 169 | No  | Standard | Female | 6.537451 | 9.526938 | < 12mo | < 12mo | Yes |
| 170 | No  | Standard | Male   | 15.1117  | 16.03154 | >=12mo | >=12mo | Yes |
| 171 | No  | Reduced  | Male   | 12.81209 | 13.96189 | >=12mo | >=12mo | Yes |
| 172 | No  | Standard | Male   | 14.58607 | 18.26544 | >=12mo | >=12mo | Yes |
| 173 | No  | Reduced  | Female | 6.997372 | 8.147175 | < 12mo | < 12mo | Yes |
| 174 | No  | Standard | Male   | 16.42576 | 17.80552 | >=12mo | >=12mo | Yes |
| 175 | No  | Reduced  | Male   | 6.668857 | 8.508541 | < 12mo | < 12mo | Yes |
| 176 | No  | Reduced  | Female | 10.41393 | 13.86334 | < 12mo | >=12mo | Yes |
| 177 | No  | Reduced  | Male   | 11.79369 | 15.47306 | < 12mo | >=12mo | Yes |
| 178 | Yes | Reduced  | Female | 15.73587 | 18.4954  | >=12mo | >=12mo | Yes |
| 179 | No  | Standard | Female | 6.110381 | 7.490145 | < 12mo | < 12mo | Yes |
| 180 | No  | Standard | Male   | 24       | 25       | >=12mo | >=12mo | No  |
| 181 | No  | Reduced  | Female | 12.54928 | 14.84888 | >=12mo | >=12mo | Yes |
| 182 | No  | Standard | Male   | 8.245729 | 11.9251  | < 12mo | < 12mo | Yes |
| 183 | No  | Standard | Female | 6.208936 | 8.968463 | < 12mo | < 12mo | Yes |
| 184 | No  | Reduced  | Female | 15       | 17       | >=12mo | >=12mo | Yes |
| 185 | Yes | Standard | Male   | 12.02365 | 14.78318 | >=12mo | >=12mo | Yes |
| 186 | No  | Standard | Female | 17.93693 | 19.08673 | >=12mo | >=12mo | Yes |
| 187 | No  | Reduced  | Female | 7.982917 | 11.66229 | < 12mo | < 12mo | No  |
| 188 | Yes | Reduced  | Female | 10.9067  | 14.81603 | < 12mo | >=12mo | Yes |
| 189 | No  | Reduced  | Female | 10.93955 | 13.0092  | < 12mo | >=12mo | Yes |
| 190 | No  | Standard | Male   | 13.30486 | 15.60447 | >=12mo | >=12mo | Yes |
| 191 | Yes | Standard | Male   | 6.701708 | 8.311432 | < 12mo | < 12mo | Yes |
| 192 | Yes | Standard | Female | 15.30881 | 16.45861 | >=12mo | >=12mo | No  |
| 193 | No  | Reduced  | Female | 9.198423 | 12.87779 | < 12mo | >=12mo | Yes |
| 194 | Yes | Reduced  | Female | 17.24704 | 20.46649 | >=12mo | >=12mo | Yes |
| 195 | Yes | Reduced  | Female | 11.13666 | 12.51643 | < 12mo | >=12mo | Yes |
| 196 | No  | Standard | Male   | 10.41393 | 13.40342 | < 12mo | >=12mo | Yes |
| 197 | Yes | Reduced  | Female | 7.260184 | 10.01971 | < 12mo | < 12mo | Yes |
| 198 | No  | Reduced  | Male   | 21       | 23       | >=12mo | >=12mo | Yes |
| 199 | Yes | Standard | Male   | 9.494086 | 13.17346 | < 12mo | >=12mo | Yes |
| 200 | No  | Standard | Female | 13.27201 | 14.19185 | >=12mo | >=12mo | Yes |
| 201 | No  | Reduced  | Female | 18.4954  | 19.64521 | >=12mo | >=12mo | No  |
| 202 | Yes | Reduced  | Female | 9.954008 | 13.63338 | < 12mo | >=12mo | Yes |
| 203 | No  | Standard | Male   | 6.077529 | 8.837056 | < 12mo | < 12mo | Yes |

|     |     |          |        |          |          |        |        |     |
|-----|-----|----------|--------|----------|----------|--------|--------|-----|
| 204 | Yes | Standard | Male   | 12.68068 | 16.13009 | >=12mo | >=12mo | Yes |
| 205 | Yes | Reduced  | Male   | 19       | 20       | >=12mo | >=12mo | No  |
| 206 | No  | Standard | Male   | 6.241787 | 9.921156 | < 12mo | < 12mo | Yes |
| 207 | Yes | Standard | Male   | 32.49014 | 33.86991 | >=12mo | >=12mo | No  |
| 208 | Yes | Reduced  | Female | 9.756899 | 13.43627 | < 12mo | >=12mo | Yes |
| 209 | Yes | Standard | Male   | 10.34823 | 13.33771 | < 12mo | >=12mo | Yes |
| 210 | Yes | Standard | Female | 6.701708 | 9.921156 | < 12mo | < 12mo | Yes |
| 211 | No  | Reduced  | Male   | 12.12221 | 12.81209 | >=12mo | >=12mo | Yes |
| 212 | No  | Reduced  | Male   | 12.02365 | 14.32326 | >=12mo | >=12mo | Yes |
| 213 | Yes | Standard | Male   | 29.43495 | 33.11432 | >=12mo | >=12mo | Yes |
| 214 | No  | Standard | Female | 8.541393 | 11.76084 | < 12mo | < 12mo | Yes |
| 215 | No  | Reduced  | Female | 8.081471 | 11.13666 | < 12mo | < 12mo | Yes |
| 216 | No  | Standard | Male   | 6.603154 | 10.05256 | < 12mo | < 12mo | Yes |
| 217 | No  | Reduced  | Male   | 6.537451 | 6.767411 | < 12mo | < 12mo | Yes |
| 218 | No  | Standard | Female | 10.47963 | 13.23916 | < 12mo | >=12mo | Yes |
| 219 | No  | Reduced  | Male   | 6.865966 | 8.245729 | < 12mo | < 12mo | Yes |
| 220 | Yes | Standard | Male   | 18.4954  | 19.41524 | >=12mo | >=12mo | No  |
| 221 | No  | Reduced  | Male   | 10       | 12       | < 12mo | >=12mo | Yes |
| 222 | No  | Reduced  | Female | 36       | 38       | >=12mo | >=12mo | Yes |
| 223 | No  | Standard | Male   | 8.771354 | 10.38108 | < 12mo | < 12mo | Yes |
| 224 | No  | Standard | Male   | 9.428384 | 10.57819 | < 12mo | < 12mo | Yes |
| 225 | No  | Reduced  | Male   | 7.227333 | 8.837056 | < 12mo | < 12mo | Yes |
| 226 | No  | Reduced  | Male   | 6.931669 | 9.231275 | < 12mo | < 12mo | Yes |
| 227 | No  | Standard | Female | 9.165571 | 10.08541 | < 12mo | < 12mo | Yes |
| 228 | No  | Standard | Male   | 6        | 8        | < 12mo | < 12mo | Yes |
| 229 | No  | Reduced  | Female | 8.245729 | 11.9251  | < 12mo | < 12mo | Yes |
| 230 | No  | Reduced  | Male   | 19.38239 | 21.45204 | >=12mo | >=12mo | Yes |
| 231 | No  | Reduced  | Female | 8.607096 | 12.28647 | < 12mo | >=12mo | Yes |
| 232 | No  | Standard | Male   | 10.87385 | 12.25361 | < 12mo | >=12mo | Yes |
| 233 | No  | Standard | Female | 9.099869 | 11.39947 | < 12mo | < 12mo | Yes |
| 234 | No  | Standard | Male   | 6.537451 | 7.687254 | < 12mo | < 12mo | Yes |
| 235 | No  | Standard | Female | 7.555848 | 10.7753  | < 12mo | < 12mo | Yes |
| 236 | No  | Reduced  | Female | 6        | 8        | < 12mo | < 12mo | No  |
| 237 | No  | Standard | Female | 22       | 25       | >=12mo | >=12mo | Yes |
| 238 | No  | Reduced  | Female | 34       | 36       | >=12mo | >=12mo | No  |
| 239 | No  | Reduced  | Female | 6        | 6        | < 12mo | < 12mo | Yes |
| 240 | No  | Reduced  | Male   | 9.329829 | 10.70959 | < 12mo | < 12mo | Yes |
| 241 | No  | Reduced  | Female | 6        | 9        | < 12mo | < 12mo | Yes |
| 242 | No  | Standard | Male   | 6.537451 | 9.296978 | < 12mo | < 12mo | Yes |
| 243 | No  | Standard | Female | 6.964521 | 10.64389 | < 12mo | < 12mo | Yes |
| 244 | No  | Standard | Male   | 7.095926 | 8.245729 | < 12mo | < 12mo | Yes |
| 245 | No  | Reduced  | Female | 7.621551 | 9.921156 | < 12mo | < 12mo | Yes |
| 246 | No  | Standard | Female | 11.95795 | 13.33771 | < 12mo | >=12mo | Yes |
| 247 | No  | Reduced  | Male   | 7        | 8        | < 12mo | < 12mo | Yes |
| 248 | No  | Reduced  | Female | 6.570302 | 8.869908 | < 12mo | < 12mo | Yes |
| 249 | No  | Standard | Female | 6.373193 | 6.373193 | < 12mo | < 12mo | Yes |
| 250 | Yes | Reduced  | Female | 7        | 9        | < 12mo | < 12mo | Yes |
| 251 | No  | Standard | Female | 6.865966 | 8.245729 | < 12mo | < 12mo | Yes |
| 252 | Yes | Standard | Female | 8.47569  | 9.395533 | < 12mo | < 12mo | Yes |
| 253 | No  | Standard | Male   | 13.89619 | 15.27595 | >=12mo | >=12mo | Yes |
| 254 | No  | Reduced  | Female | 7.227333 | 9.986859 | < 12mo | < 12mo | Yes |

|     |     |          |        |          |          |        |        |     |
|-----|-----|----------|--------|----------|----------|--------|--------|-----|
| 255 | No  | Standard | Male   | 7.621551 | 11.30092 | < 12mo | < 12mo | Yes |
| 256 | Yes | Reduced  | Male   | 9.001314 | 11.76084 | < 12mo | < 12mo | Yes |
| 257 | No  | Reduced  | Female | 10.01971 | 13.69908 | < 12mo | >=12mo | Yes |
| 258 | Yes | Reduced  | Male   | 7.884363 | 11.33377 | < 12mo | < 12mo | Yes |
| 259 | No  | Standard | Male   | 12.74639 | 14.78318 | >=12mo | >=12mo | Yes |
| 260 | No  | Reduced  | Female | 6.997372 | 8.837056 | < 12mo | < 12mo | Yes |
| 261 | No  | Reduced  | Female | 6.077529 | 6.767411 | < 12mo | < 12mo | Yes |
| 262 | Yes | Standard | Male   | 12.45072 | 13.1406  | >=12mo | >=12mo | Yes |
| 263 | Yes | Standard | Male   | 17.14849 | 19.21813 | >=12mo | >=12mo | Yes |
| 264 | No  | Standard | Female | 8.541393 | 9.921156 | < 12mo | < 12mo | Yes |
| 265 | Yes | Reduced  | Female | 7.720105 | 11.39947 | < 12mo | < 12mo | Yes |
| 266 | Yes | Reduced  | Female | 11.8594  | 13.0092  | < 12mo | >=12mo | Yes |
| 267 | Yes | Reduced  | Female | 6.898818 | 10.57819 | < 12mo | < 12mo | Yes |
| 268 | Yes | Standard | Male   | 7.950066 | 9.329829 | < 12mo | < 12mo | Yes |
| 269 | Yes | Standard | Female | 17       | 18       | >=12mo | >=12mo | No  |
| 270 | No  | Reduced  | Female | 6.73456  | 8.574245 | < 12mo | < 12mo | Yes |
| 271 | Yes | Standard | Female | 9.329829 | 11.62944 | < 12mo | < 12mo | Yes |
| 272 | Yes | Standard | Female | 19.61235 | 23.29172 | >=12mo | >=12mo | Yes |
| 273 | Yes | Reduced  | Female | 6.997372 | 7.687254 | < 12mo | < 12mo | Yes |
| 274 | Yes | Reduced  | Female | 8.968463 | 10.80815 | < 12mo | < 12mo | Yes |
| 275 | Yes | Reduced  | Male   | 17       | 19       | >=12mo | >=12mo | No  |
| 276 | No  | Standard | Female | 25.52562 | 27.36531 | >=12mo | >=12mo | Yes |
| 277 | Yes | Standard | Female | 33.34428 | 33.80421 | >=12mo | >=12mo | No  |
| 278 | Yes | Standard | Male   | 8.869908 | 9.55979  | < 12mo | < 12mo | Yes |
| 279 | Yes | Reduced  | Male   | 8.278581 | 10.34823 | < 12mo | < 12mo | Yes |
| 280 | Yes | Standard | Female | 9.36268  | 13.04205 | < 12mo | >=12mo | Yes |
| 281 | Yes | Reduced  | Male   | 11.30092 | 12.22076 | < 12mo | >=12mo | Yes |
| 282 | No  | Reduced  | Female | 9.55979  | 11.62944 | < 12mo | < 12mo | Yes |
| 283 | No  | Standard | Female | 22       | 23       | >=12mo | >=12mo | No  |
| 284 | Yes | Reduced  | Male   | 16.42576 | 20.10513 | >=12mo | >=12mo | No  |
| 285 | Yes | Standard | Male   | 7.522996 | 9.822602 | < 12mo | < 12mo | Yes |
| 286 | Yes | Reduced  | Female | 16       | 17       | >=12mo | >=12mo | Yes |
| 287 | Yes | Reduced  | Female | 7        | 8        | < 12mo | < 12mo | Yes |
| 288 | Yes | Standard | Female | 11       | 12       | < 12mo | >=12mo | Yes |
| 289 | Yes | Standard | Female | 9        | 12       | < 12mo | >=12mo | Yes |
| 290 | Yes | Standard | Female | 8.04862  | 9.658344 | < 12mo | < 12mo | Yes |
| 291 | Yes | Reduced  | Male   | 14.65177 | 15.80158 | >=12mo | >=12mo | Yes |
| 292 | Yes | Reduced  | Female | 13.17346 | 14.32326 | >=12mo | >=12mo | Yes |
| 293 | No  | Standard | Female | 6        | 10       | < 12mo | < 12mo | Yes |
| 294 | Yes | Reduced  | Female | 36.69514 | 40.37451 | >=12mo | >=12mo | No  |
| 295 | Yes | Standard | Male   | 24       | 24       | >=12mo | >=12mo | Yes |
| 296 | Yes | Reduced  | Female | 17       | 18       | >=12mo | >=12mo | Yes |
| 297 | Yes | Standard | Male   | 8.70565  | 12.15506 | < 12mo | >=12mo | Yes |
| 298 | No  | Standard | Female | 36       | 38       | >=12mo | >=12mo | No  |
| 299 | Yes | Reduced  | Male   | 8.607096 | 11.82654 | < 12mo | < 12mo | Yes |
| 300 | Yes | Reduced  | Female | 14.25756 | 15.1774  | >=12mo | >=12mo | Yes |
| 301 | Yes | Standard | Male   | 9.001314 | 12.68068 | < 12mo | >=12mo | Yes |
| 302 | Yes | Standard | Female | 9.822602 | 13.50197 | < 12mo | >=12mo | Yes |
| 303 | No  | Standard | Male   | 6.800263 | 7.030223 | < 12mo | < 12mo | Yes |
| 304 | Yes | Reduced  | Female | 7.884363 | 8.804205 | < 12mo | < 12mo | Yes |
| 305 | Yes | Reduced  | Female | 6.504599 | 10.18397 | < 12mo | < 12mo | Yes |

|     |     |          |        |          |          |        |        |     |
|-----|-----|----------|--------|----------|----------|--------|--------|-----|
| 306 | Yes | Standard | Male   | 24       | 25       | >=12mo | >=12mo | Yes |
| 307 | No  | Reduced  | Male   | 8.311432 | 11.9908  | < 12mo | < 12mo | Yes |
| 308 | No  | Reduced  | Male   | 7.884363 | 9.264126 | < 12mo | < 12mo | Yes |
| 309 | Yes | Standard | Female | 41.09724 | 42.47701 | >=12mo | >=12mo | No  |
| 310 | Yes | Reduced  | Female | 7.424441 | 11.10381 | < 12mo | < 12mo | Yes |
| 311 | No  | Reduced  | Male   | 11.95795 | 13.33771 | < 12mo | >=12mo | Yes |
| 312 | Yes | Standard | Female | 6        | 8        | < 12mo | < 12mo | Yes |
| 313 | Yes | Standard | Female | 6.537451 | 8.837056 | < 12mo | < 12mo | Yes |
| 314 | Yes | Standard | Male   | 9.658344 | 10.57819 | < 12mo | < 12mo | Yes |
| 315 | Yes | Standard | Female | 6.636005 | 8.47569  | < 12mo | < 12mo | Yes |
| 316 | Yes | Reduced  | Female | 6.044678 | 9.034165 | < 12mo | < 12mo | Yes |
| 317 | Yes | Reduced  | Male   | 19.80946 | 21.64915 | >=12mo | >=12mo | Yes |
| 318 | Yes | Standard | Female | 7.884363 | 9.494086 | < 12mo | < 12mo | Yes |
| 319 | Yes | Reduced  | Male   | 6.011827 | 8.771354 | < 12mo | < 12mo | Yes |
| 320 | Yes | Reduced  | Male   | 6.110381 | 9.55979  | < 12mo | < 12mo | Yes |
| 321 | Yes | Standard | Male   | 13       | 15       | >=12mo | >=12mo | Yes |
| 322 | No  | Reduced  | Female | 10.05256 | 10.9724  | < 12mo | < 12mo | Yes |
| 323 | No  | Standard | Male   | 13.23916 | 14.159   | >=12mo | >=12mo | Yes |
| 324 | Yes | Standard | Male   | 13.40342 | 14.78318 | >=12mo | >=12mo | Yes |
| 325 | No  | Reduced  | Male   | 7.39159  | 7.39159  | < 12mo | < 12mo | Yes |
| 326 | No  | Standard | Male   | 7.785808 | 11.46518 | < 12mo | < 12mo | Yes |
| 327 | Yes | Reduced  | Female | 7.490145 | 9.78975  | < 12mo | < 12mo | Yes |
| 328 | Yes | Standard | Female | 12.74639 | 14.81603 | >=12mo | >=12mo | Yes |
| 329 | No  | Standard | Female | 9.36268  | 13.04205 | < 12mo | >=12mo | Yes |
| 330 | Yes | Reduced  | Female | 6.997372 | 8.147175 | < 12mo | < 12mo | Yes |
| 331 | Yes | Reduced  | Male   | 14.61892 | 15.07884 | >=12mo | >=12mo | Yes |
| 332 | No  | Reduced  | Male   | 7.588699 | 9.888305 | < 12mo | < 12mo | Yes |
| 333 | No  | Standard | Female | 8.114324 | 11.79369 | < 12mo | < 12mo | Yes |
| 334 | No  | Standard | Female | 10.9724  | 13.73193 | < 12mo | >=12mo | Yes |
| 335 | No  | Reduced  | Female | 8.639948 | 11.8594  | < 12mo | < 12mo | Yes |
| 336 | No  | Reduced  | Male   | 20       | 23       | >=12mo | >=12mo | Yes |
| 337 | No  | Standard | Female | 7.293036 | 10.9724  | < 12mo | < 12mo | Yes |
| 338 | No  | Standard | Male   | 6.73456  | 10.41393 | < 12mo | < 12mo | Yes |
| 339 | No  | Reduced  | Male   | 15.90013 | 16.59001 | >=12mo | >=12mo | Yes |
| 340 | No  | Reduced  | Male   | 16       | 17       | >=12mo | >=12mo | Yes |
| 341 | No  | Standard | Male   | 11.46518 | 12.84494 | < 12mo | >=12mo | Yes |
| 342 | No  | Reduced  | Female | 10.9067  | 11.59658 | < 12mo | < 12mo | Yes |
| 343 | No  | Standard | Male   | 10.18397 | 10.87385 | < 12mo | < 12mo | Yes |
| 344 | No  | Standard | Male   | 6.471748 | 9.921156 | < 12mo | < 12mo | Yes |
| 345 | No  | Reduced  | Female | 26       | 29       | >=12mo | >=12mo | No  |
| 346 | No  | Reduced  | Male   | 7.325887 | 11.00526 | < 12mo | < 12mo | Yes |
| 347 | Yes | Reduced  | Male   | 11.56373 | 12.9435  | < 12mo | >=12mo | Yes |
| 348 | Yes | Standard | Male   | 11.95795 | 12.87779 | < 12mo | >=12mo | Yes |
| 349 | No  | Standard | Female | 6.668857 | 9.888305 | < 12mo | < 12mo | Yes |
| 350 | Yes | Standard | Female | 7.950066 | 10.47963 | < 12mo | < 12mo | Yes |
| 351 | No  | Reduced  | Female | 6.537451 | 7.917214 | < 12mo | < 12mo | Yes |
| 352 | Yes | Standard | Male   | 12       | 13       | >=12mo | >=12mo | Yes |
| 353 | No  | Reduced  | Male   | 8.968463 | 12.41787 | < 12mo | >=12mo | Yes |
| 354 | Yes | Reduced  | Male   | 12.35217 | 14.19185 | >=12mo | >=12mo | Yes |
| 355 | Yes | Standard | Male   | 15.53877 | 16.68857 | >=12mo | >=12mo | No  |
| 356 | Yes | Reduced  | Female | 36.26807 | 36.95795 | >=12mo | >=12mo | No  |

|     |     |          |        |          |                 |        |     |
|-----|-----|----------|--------|----------|-----------------|--------|-----|
| 357 | No  | Standard | Male   | 9        | 11 < 12mo       | < 12mo | Yes |
| 358 | Yes | Reduced  | Female | 27.98949 | 28.67937 >=12mo | >=12mo | No  |
| 359 | No  | Standard | Female | 6        | 7 < 12mo        | < 12mo | Yes |
| 360 | Yes | Reduced  | Female | 7.555848 | 8.47569 < 12mo  | < 12mo | Yes |
| 361 | No  | Standard | Female | 7.424441 | 11.10381 < 12mo | < 12mo | Yes |
| 362 | Yes | Reduced  | Male   | 10.24967 | 11.16951 < 12mo | < 12mo | Yes |
| 363 | No  | Standard | Female | 57.95007 | 60.47963 >=12mo | >=12mo | No  |
| 364 | No  | Standard | Male   | 32       | 34 >=12mo       | >=12mo | No  |
| 365 | Yes | Reduced  | Female | 10.93955 | 14.38896 < 12mo | >=12mo | Yes |
| 366 | Yes | Standard | Male   | 7.358738 | 11.03811 < 12mo | < 12mo | Yes |
| 367 | Yes | Reduced  | Male   | 7.358738 | 8.278581 < 12mo | < 12mo | Yes |
| 368 | Yes | Standard | Female | 6.865966 | 10.54534 < 12mo | < 12mo | Yes |
| 369 | Yes | Reduced  | Female | 8.081471 | 9.691196 < 12mo | < 12mo | Yes |
| 370 | Yes | Standard | Male   | 7.720105 | 9.099869 < 12mo | < 12mo | Yes |
| 371 | Yes | Reduced  | Female | 7.39159  | 11.07096 < 12mo | < 12mo | Yes |
| 372 | No  | Reduced  | Female | 23.71879 | 26.93824 >=12mo | >=12mo | Yes |
| 373 | No  | Reduced  | Female | 8.837056 | 11.13666 < 12mo | < 12mo | Yes |
| 374 | Yes | Standard | Male   | 11.53088 | 15.21025 < 12mo | >=12mo | Yes |
| 375 | Yes | Standard | Male   | 7.950066 | 11.16951 < 12mo | < 12mo | Yes |
| 376 | Yes | Reduced  | Male   | 13.37057 | 15.90013 >=12mo | >=12mo | Yes |
| 377 | No  | Standard | Female | 6.898818 | 8.278581 < 12mo | < 12mo | Yes |
| 378 | No  | Standard | Male   | 15.44021 | 16.81997 >=12mo | >=12mo | Yes |
| 379 | No  | Standard | Female | 11.72799 | 13.10775 < 12mo | >=12mo | Yes |
| 380 | No  | Reduced  | Female | 7.227333 | 10.67674 < 12mo | < 12mo | Yes |
| 381 | No  | Reduced  | Male   | 8.672799 | 9.36268 < 12mo  | < 12mo | Yes |
| 382 | Yes | Reduced  | Male   | 26.37976 | 27.06965 >=12mo | >=12mo | No  |
| 383 | Yes | Standard | Male   | 6.143233 | 7.752957 < 12mo | < 12mo | Yes |
| 384 | No  | Standard | Female | 6.044678 | 9.724048 < 12mo | < 12mo | Yes |
| 385 | Yes | Reduced  | Male   | 11.69514 | 15.37451 < 12mo | >=12mo | Yes |
| 386 | No  | Reduced  | Female | 7.654402 | 8.804205 < 12mo | < 12mo | Yes |
| 387 | Yes | Standard | Female | 48       | 48 >=12mo       | >=12mo | No  |
| 388 | Yes | Standard | Female | 6.176084 | 8.47569 < 12mo  | < 12mo | Yes |
| 389 | No  | Standard | Male   | 27       | 28 >=12mo       | >=12mo | No  |
| 390 | No  | Reduced  | Female | 28.81078 | 30.4205 >=12mo  | >=12mo | No  |
| 391 | No  | Reduced  | Female | 29.76347 | 32.29303 >=12mo | >=12mo | No  |
| 392 | No  | Standard | Female | 7.325887 | 10.7753 < 12mo  | < 12mo | Yes |
| 393 | No  | Standard | Female | 7.621551 | 11.30092 < 12mo | < 12mo | Yes |
| 394 | No  | Reduced  | Female | 12.08936 | 15.76873 >=12mo | >=12mo | Yes |
| 395 | No  | Reduced  | Female | 14       | 15 >=12mo       | >=12mo | No  |
| 396 | No  | Reduced  | Female | 14       | 18 >=12mo       | >=12mo | Yes |
| 397 | No  | Standard | Female | 17       | 21 >=12mo       | >=12mo | Yes |
| 398 | No  | Reduced  | Male   | 44       | 45 >=12mo       | >=12mo | No  |
| 399 | No  | Standard | Female | 7.194481 | 9.724048 < 12mo | < 12mo | Yes |
| 400 | No  | Standard | Female | 6.208936 | 9.198423 < 12mo | < 12mo | Yes |
| 401 | No  | Reduced  | Female | 7.227333 | 9.067018 < 12mo | < 12mo | Yes |
| 402 | No  | Standard | Male   | 10.18397 | 11.79369 < 12mo | < 12mo | Yes |
| 403 | No  | Standard | Female | 7.095926 | 10.31537 < 12mo | < 12mo | Yes |
| 404 | No  | Standard | Male   | 7.720105 | 8.409987 < 12mo | < 12mo | Yes |
| 405 | Yes | Reduced  | Female | 19.5138  | 20.89356 >=12mo | >=12mo | Yes |
| 406 | No  | Reduced  | Male   | 7.194481 | 10.87385 < 12mo | < 12mo | Yes |
| 407 | No  | Reduced  | Male   | 9.36268  | 10.28252 < 12mo | < 12mo | Yes |



|     |     |          |        |          |          |        |        |     |
|-----|-----|----------|--------|----------|----------|--------|--------|-----|
| 408 | No  | Standard | Female | 8.147175 | 9.067018 | < 12mo | < 12mo | Yes |
| 409 | Yes | Reduced  | Female | 7.128778 | 8.04862  | < 12mo | < 12mo | Yes |
| 410 | Yes | Standard | Female | 7        | 10       | < 12mo | < 12mo | Yes |
| 411 | Yes | Standard | Male   | 22.66754 | 25.42707 | >=12mo | >=12mo | Yes |
| 412 | No  | Standard | Female | 9.526938 | 10.67674 | < 12mo | < 12mo | Yes |
| 413 | No  | Standard | Male   | 22.96321 | 24.11301 | >=12mo | >=12mo | Yes |
| 414 | No  | Reduced  | Female | 8.935611 | 12.38502 | < 12mo | >=12mo | Yes |
| 415 | No  | Reduced  | Male   | 15.86728 | 16.78712 | >=12mo | >=12mo | Yes |
| 416 | Yes | Reduced  | Male   | 11.82654 | 14.12615 | < 12mo | >=12mo | Yes |
| 417 | Yes | Reduced  | Female | 11.13666 | 14.81603 | < 12mo | >=12mo | Yes |
| 418 | Yes | Standard | Male   | 10.44678 | 12.74639 | < 12mo | >=12mo | Yes |
| 419 | Yes | Reduced  | Female | 6.636005 | 10.54534 | < 12mo | < 12mo | Yes |
| 420 | Yes | Standard | Male   | 10.34823 | 12.41787 | < 12mo | >=12mo | Yes |
| 421 | No  | Standard | Female | 7.293036 | 7.982917 | < 12mo | < 12mo | Yes |
| 422 | Yes | Reduced  | Female | 12.18791 | 12.87779 | >=12mo | >=12mo | Yes |
| 423 | Yes | Standard | Female | 7.522996 | 11.20237 | < 12mo | < 12mo | Yes |
| 424 | Yes | Reduced  | Female | 6.504599 | 9.264126 | < 12mo | < 12mo | Yes |
| 425 | No  | Reduced  | Female | 9.55979  | 10.47963 | < 12mo | < 12mo | Yes |
| 426 | Yes | Standard | Female | 14.0276  | 17.01708 | >=12mo | >=12mo | Yes |
| 427 | No  | Reduced  | Male   | 10.38108 | 11.9908  | < 12mo | < 12mo | Yes |
| 428 | Yes | Standard | Female | 6.931669 | 10.61104 | < 12mo | < 12mo | Yes |
| 429 | Yes | Standard | Female | 11.03811 | 12.64783 | < 12mo | >=12mo | Yes |
| 430 | Yes | Reduced  | Female | 6.636005 | 10.31537 | < 12mo | < 12mo | Yes |
| 431 | Yes | Reduced  | Female | 6.274639 | 9.954008 | < 12mo | < 12mo | Yes |
| 432 | Yes | Standard | Female | 6.73456  | 9.264126 | < 12mo | < 12mo | Yes |
| 433 | No  | Reduced  | Female | 6.208936 | 9.888305 | < 12mo | < 12mo | Yes |
| 434 | Yes | Standard | Male   | 39.71748 | 43.39685 | >=12mo | >=12mo | No  |
| 435 | No  | Standard | Female | 25.16426 | 26.54402 | >=12mo | >=12mo | Yes |
| 436 | No  | Reduced  | Female | 14.55322 | 16.16294 | >=12mo | >=12mo | Yes |
| 437 | No  | Standard | Male   | 6.767411 | 7.917214 | < 12mo | < 12mo | Yes |
| 438 | No  | Reduced  | Male   | 12.81209 | 13.27201 | >=12mo | >=12mo | Yes |
| 439 | Yes | Standard | Male   | 33.77136 | 34.92116 | >=12mo | >=12mo | No  |
| 440 | Yes | Reduced  | Male   | 14.65177 | 16.03154 | >=12mo | >=12mo | Yes |
| 441 | Yes | Reduced  | Male   | 8.212878 | 8.90276  | < 12mo | < 12mo | Yes |
| 442 | No  | Standard | Male   | 8.04862  | 9.428384 | < 12mo | < 12mo | Yes |
| 443 | Yes | Standard | Female | 7.030223 | 8.180026 | < 12mo | < 12mo | Yes |
| 444 | No  | Reduced  | Male   | 10.64389 | 12.25361 | < 12mo | >=12mo | Yes |
| 445 | No  | Standard | Male   | 9.13272  | 12.81209 | < 12mo | >=12mo | Yes |
| 446 | No  | Standard | Female | 12.38502 | 16.06439 | >=12mo | >=12mo | Yes |
| 447 | No  | Reduced  | Male   | 15.1774  | 18.39685 | >=12mo | >=12mo | Yes |
| 448 | Yes | Reduced  | Female | 20.99212 | 22.8318  | >=12mo | >=12mo | Yes |
| 449 | No  | Reduced  | Female | 9.526938 | 12.28647 | < 12mo | >=12mo | Yes |
| 450 | No  | Standard | Female | 12.51643 | 16.1958  | >=12mo | >=12mo | Yes |
| 451 | No  | Standard | Male   | 23.58739 | 26.57687 | >=12mo | >=12mo | No  |
| 452 | Yes | Reduced  | Female | 20.49934 | 24.17871 | >=12mo | >=12mo | Yes |
| 453 | No  | Reduced  | Male   | 17.3456  | 21.02497 | >=12mo | >=12mo | Yes |
| 454 | No  | Standard | Female | 8.541393 | 11.76084 | < 12mo | < 12mo | Yes |
| 455 | No  | Standard | Male   | 6.406045 | 10.08541 | < 12mo | < 12mo | Yes |
| 456 | No  | Reduced  | Male   | 16.68857 | 17.60841 | >=12mo | >=12mo | Yes |
| 457 | No  | Standard | Female | 6.964521 | 8.574245 | < 12mo | < 12mo | Yes |
| 458 | No  | Reduced  | Male   | 16.88568 | 18.72536 | >=12mo | >=12mo | No  |

|     |     |          |        |          |          |        |        |     |
|-----|-----|----------|--------|----------|----------|--------|--------|-----|
| 459 | No  | Standard | Male   | 6.110381 | 7.720105 | < 12mo | < 12mo | Yes |
| 460 | No  | Reduced  | Male   | 15.99869 | 18.52825 | >=12mo | >=12mo | Yes |
| 461 | No  | Reduced  | Male   | 16.52431 | 20.20368 | >=12mo | >=12mo | Yes |
| 462 | No  | Standard | Female | 10.41393 | 14.0933  | < 12mo | >=12mo | Yes |
| 463 | Yes | Standard | Female | 9.625493 | 12.61498 | < 12mo | >=12mo | Yes |
| 464 | No  | Reduced  | Male   | 14.48752 | 16.3272  | >=12mo | >=12mo | Yes |
| 465 | No  | Reduced  | Male   | 9.231275 | 10.61104 | < 12mo | < 12mo | Yes |
| 466 | No  | Standard | Male   | 22.43758 | 23.58739 | >=12mo | >=12mo | Yes |
| 467 | Yes | Standard | Female | 14.81603 | 16.42576 | >=12mo | >=12mo | Yes |
| 468 | Yes | Reduced  | Female | 8.04862  | 9.428384 | < 12mo | < 12mo | Yes |
| 469 | Yes | Reduced  | Male   | 6.110381 | 7.260184 | < 12mo | < 12mo | No  |
| 470 | No  | Reduced  | Male   | 9.329829 | 13.23916 | < 12mo | >=12mo | Yes |
| 471 | No  | Standard | Male   | 8.377135 | 9.526938 | < 12mo | < 12mo | Yes |
| 472 | Yes | Standard | Male   | 8.70565  | 11.69514 | < 12mo | < 12mo | Yes |
| 473 | No  | Standard | Female | 28.90933 | 30.97898 | >=12mo | >=12mo | No  |
| 474 | No  | Standard | Female | 10.08541 | 12.61498 | < 12mo | >=12mo | Yes |
| 475 | No  | Reduced  | Male   | 13.10775 | 16.78712 | >=12mo | >=12mo | Yes |
| 476 | Yes | Standard | Female | 29       | 30       | >=12mo | >=12mo | No  |
| 477 | Yes | Standard | Male   | 13.30486 | 16.75427 | >=12mo | >=12mo | Yes |
| 478 | Yes | Standard | Female | 10.31537 | 13.99474 | < 12mo | >=12mo | Yes |
| 479 | No  | Reduced  | Male   | 48.09461 | 49.9343  | >=12mo | >=12mo | No  |
| 480 | No  | Reduced  | Male   | 37       | 39       | >=12mo | >=12mo | Yes |
| 481 | Yes | Reduced  | Male   | 7.687254 | 9.067018 | < 12mo | < 12mo | Yes |
| 482 | Yes | Reduced  | Female | 31.73456 | 32.6544  | >=12mo | >=12mo | No  |
| 483 | No  | Reduced  | Male   | 9.231275 | 12.91064 | < 12mo | >=12mo | Yes |
| 484 | No  | Standard | Female | 9.067018 | 12.74639 | < 12mo | >=12mo | Yes |
| 485 | No  | Standard | Female | 46.09067 | 49.77004 | >=12mo | >=12mo | No  |
| 486 | Yes | Reduced  | Male   | 14.06045 | 14.75033 | >=12mo | >=12mo | Yes |
| 487 | Yes | Standard | Male   | 25.32852 | 27.62812 | >=12mo | >=12mo | No  |
| 488 | Yes | Standard | Female | 8.935611 | 10.7753  | < 12mo | < 12mo | Yes |
| 489 | Yes | Reduced  | Male   | 53.51511 | 54.66491 | >=12mo | >=12mo | No  |
| 490 | Yes | Reduced  | Female | 15.27595 | 18.72536 | >=12mo | >=12mo | Yes |
| 491 | No  | Standard | Female | 8.837056 | 10.21682 | < 12mo | < 12mo | Yes |
| 492 | No  | Reduced  | Male   | 8.311432 | 8.311432 | < 12mo | < 12mo | Yes |
| 493 | No  | Standard | Male   | 22.07622 | 25.75559 | >=12mo | >=12mo | Yes |
| 494 | No  | Standard | Male   | 21.41919 | 23.48883 | >=12mo | >=12mo | Yes |
| 495 | Yes | Standard | Female | 13.89619 | 15.73587 | >=12mo | >=12mo | Yes |
| 496 | Yes | Standard | Female | 10.841   | 12.22076 | < 12mo | >=12mo | Yes |
| 497 | No  | Reduced  | Female | 27.46386 | 29.30355 | >=12mo | >=12mo | No  |
| 498 | Yes | Reduced  | Male   | 9.067018 | 12.74639 | < 12mo | >=12mo | Yes |
| 499 | No  | Reduced  | Male   | 8.672799 | 10.28252 | < 12mo | < 12mo | Yes |
| 500 | Yes | Standard | Male   | 11.30092 | 14.98029 | < 12mo | >=12mo | Yes |
| 501 | No  | Reduced  | Female | 26.77398 | 28.84363 | >=12mo | >=12mo | No  |
| 502 | No  | Reduced  | Female | 6.931669 | 8.771354 | < 12mo | < 12mo | Yes |
| 503 | No  | Standard | Male   | 25.0657  | 26.90539 | >=12mo | >=12mo | Yes |
| 504 | No  | Reduced  | Male   | 6.110381 | 9.78975  | < 12mo | < 12mo | Yes |
| 505 | Yes | Standard | Male   | 8.90276  | 12.35217 | < 12mo | >=12mo | Yes |
| 506 | Yes | Reduced  | Male   | 8.147175 | 11.13666 | < 12mo | < 12mo | Yes |
| 507 | Yes | Reduced  | Female | 7.81866  | 8.508541 | < 12mo | < 12mo | Yes |
| 508 | Yes | Standard | Male   | 7.752957 | 11.43233 | < 12mo | < 12mo | Yes |
| 509 | Yes | Standard | Female | 6.406045 | 10.08541 | < 12mo | < 12mo | Yes |

|     |     |          |        |          |          |        |        |     |
|-----|-----|----------|--------|----------|----------|--------|--------|-----|
| 510 | Yes | Standard | Female | 11.53088 | 12.91064 | < 12mo | >=12mo | Yes |
| 511 | No  | Reduced  | Male   | 15       | 16       | >=12mo | >=12mo | Yes |
| 512 | No  | Standard | Female | 12.9435  | 16.62286 | >=12mo | >=12mo | Yes |
| 513 | No  | Standard | Female | 6.143233 | 6.373193 | < 12mo | < 12mo | Yes |
| 514 | No  | Standard | Female | 22.63469 | 26.31406 | >=12mo | >=12mo | Yes |
| 515 | No  | Standard | Female | 15       | 19       | >=12mo | >=12mo | No  |
| 516 | No  | Reduced  | Female | 8.04862  | 10.57819 | < 12mo | < 12mo | Yes |
| 517 | No  | Reduced  | Male   | 22.70039 | 26.37976 | >=12mo | >=12mo | Yes |
| 518 | No  | Reduced  | Male   | 7.358738 | 9.888305 | < 12mo | < 12mo | Yes |
| 519 | No  | Reduced  | Female | 6.964521 | 9.724048 | < 12mo | < 12mo | Yes |
| 520 | No  | Standard | Female | 14.32326 | 16.3929  | >=12mo | >=12mo | Yes |
| 521 | No  | Standard | Female | 9.855454 | 13.53482 | < 12mo | >=12mo | Yes |
| 522 | No  | Reduced  | Female | 6.833114 | 10.05256 | < 12mo | < 12mo | Yes |
| 523 | No  | Standard | Female | 6        | 10       | < 12mo | < 12mo | Yes |
| 524 | No  | Reduced  | Female | 11.76084 | 12.91064 | < 12mo | >=12mo | Yes |
| 525 | No  | Reduced  | Female | 8.47569  | 11.03811 | < 12mo | < 12mo | Yes |
| 526 | No  | Standard | Female | 12.77924 | 15.30881 | >=12mo | >=12mo | Yes |
| 527 | No  | Reduced  | Female | 14.75033 | 18.4297  | >=12mo | >=12mo | Yes |
| 528 | Yes | Standard | Male   | 17.18134 | 19.25099 | >=12mo | >=12mo | Yes |
| 529 | No  | Reduced  | Male   | 6.208936 | 7.81866  | < 12mo | < 12mo | Yes |
| 530 | No  | Reduced  | Female | 23.06176 | 23.9816  | >=12mo | >=12mo | Yes |
| 531 | No  | Reduced  | Male   | 16.36005 | 18.19974 | >=12mo | >=12mo | Yes |
| 532 | No  | Standard | Female | 7.654402 | 8.804205 | < 12mo | < 12mo | Yes |
| 533 | Yes | Standard | Male   | 6.668857 | 10.11827 | < 12mo | < 12mo | Yes |
| 534 | Yes | Reduced  | Female | 12.64783 | 16.09724 | >=12mo | >=12mo | Yes |
| 535 | No  | Standard | Female | 6.110381 | 9.78975  | < 12mo | < 12mo | Yes |
| 536 | Yes | Standard | Male   | 14.19185 | 15.34166 | >=12mo | >=12mo | No  |
| 537 | Yes | Reduced  | Female | 8.771354 | 12.45072 | < 12mo | >=12mo | Yes |
| 538 | No  | Standard | Female | 6.964521 | 9.954008 | < 12mo | < 12mo | Yes |
| 539 | Yes | Reduced  | Female | 19.87516 | 22.17477 | >=12mo | >=12mo | No  |
| 540 | Yes | Reduced  | Male   | 7.293036 | 10.51248 | < 12mo | < 12mo | Yes |
| 541 | No  | Standard | Male   | 10.24967 | 10.93955 | < 12mo | < 12mo | Yes |
| 542 | No  | Standard | Male   | 6.898818 | 10.34823 | < 12mo | < 12mo | Yes |
| 543 | Yes | Standard | Male   | 6.406045 | 7.785808 | < 12mo | < 12mo | Yes |
| 544 | Yes | Reduced  | Male   | 6        | 7        | < 12mo | < 12mo | Yes |
| 545 | Yes | Reduced  | Male   | 10.74244 | 14.42181 | < 12mo | >=12mo | Yes |
| 546 | Yes | Reduced  | Female | 6.143233 | 7.982917 | < 12mo | < 12mo | Yes |
| 547 | Yes | Reduced  | Male   | 8.968463 | 12.64783 | < 12mo | >=12mo | Yes |
| 548 | Yes | Standard | Male   | 10.24967 | 11.62944 | < 12mo | < 12mo | Yes |
| 549 | Yes | Standard | Female | 7.588699 | 11.26807 | < 12mo | < 12mo | Yes |
| 550 | Yes | Standard | Male   | 7.917214 | 10.67674 | < 12mo | < 12mo | Yes |
| 551 | Yes | Reduced  | Male   | 21.78055 | 22.70039 | >=12mo | >=12mo | No  |
| 552 | Yes | Standard | Female | 7.720105 | 11.39947 | < 12mo | < 12mo | Yes |
| 553 | Yes | Reduced  | Male   | 17.18134 | 20.86071 | >=12mo | >=12mo | Yes |
| 554 | Yes | Reduced  | Male   | 30.15769 | 30.84757 | >=12mo | >=12mo | No  |
| 555 | Yes | Standard | Female | 7.030223 | 9.78975  | < 12mo | < 12mo | Yes |
| 556 | Yes | Reduced  | Male   | 15.60447 | 19.28384 | >=12mo | >=12mo | Yes |
| 557 | No  | Reduced  | Female | 57       | 59       | >=12mo | >=12mo | No  |
| 558 | No  | Standard | Male   | 8        | 12       | < 12mo | >=12mo | Yes |
| 559 | No  | Reduced  | Female | 14.159   | 17.83837 | >=12mo | >=12mo | Yes |
| 560 | Yes | Standard | Female | 13.0092  | 15.30881 | >=12mo | >=12mo | No  |

|     |     |          |        |          |          |        |        |     |
|-----|-----|----------|--------|----------|----------|--------|--------|-----|
| 561 | No  | Reduced  | Male   | 9.165571 | 12.84494 | < 12mo | >=12mo | Yes |
| 562 | Yes | Reduced  | Female | 6.570302 | 8.180026 | < 12mo | < 12mo | Yes |
| 563 | No  | Standard | Female | 17.37845 | 20.13798 | >=12mo | >=12mo | Yes |
| 564 | No  | Standard | Female | 7.752957 | 9.13272  | < 12mo | < 12mo | Yes |
| 565 | No  | Standard | Female | 7.063075 | 9.592641 | < 12mo | < 12mo | Yes |
| 566 | No  | Reduced  | Male   | 11.49803 | 15.1774  | < 12mo | >=12mo | Yes |
| 567 | No  | Reduced  | Female | 16.88568 | 18.72536 | >=12mo | >=12mo | Yes |
| 568 | No  | Standard | Male   | 6.931669 | 10.15112 | < 12mo | < 12mo | Yes |
| 569 | No  | Reduced  | Male   | 19.5795  | 20.7293  | >=12mo | >=12mo | Yes |
| 570 | No  | Reduced  | Male   | 17.37845 | 18.75821 | >=12mo | >=12mo | No  |
| 571 | Yes | Standard | Male   | 21.87911 | 23.71879 | >=12mo | >=12mo | Yes |
| 572 | No  | Standard | Male   | 20.46649 | 21.38633 | >=12mo | >=12mo | Yes |
| 573 | No  | Reduced  | Female | 18.13404 | 21.8134  | >=12mo | >=12mo | Yes |
| 574 | No  | Reduced  | Female | 9        | 10       | < 12mo | < 12mo | Yes |
| 575 | No  | Reduced  | Female | 9.954008 | 10.87385 | < 12mo | < 12mo | Yes |
| 576 | No  | Standard | Male   | 21.02497 | 23.32457 | >=12mo | >=12mo | Yes |
| 577 | No  | Standard | Male   | 9.526938 | 12.74639 | < 12mo | >=12mo | Yes |
| 578 | No  | Reduced  | Male   | 7.227333 | 9.986859 | < 12mo | < 12mo | No  |
| 579 | No  | Standard | Male   | 9        | 10       | < 12mo | < 12mo | Yes |
| 580 | No  | Standard | Male   | 7.950066 | 7.950066 | < 12mo | < 12mo | Yes |
| 581 | No  | Standard | Male   | 6.406045 | 10.08541 | < 12mo | < 12mo | Yes |
| 582 | No  | Reduced  | Female | 11.10381 | 13.40342 | < 12mo | >=12mo | Yes |
| 583 | No  | Reduced  | Male   | 10.93955 | 12.54928 | < 12mo | >=12mo | Yes |
| 584 | No  | Reduced  | Female | 8.672799 | 10.28252 | < 12mo | < 12mo | Yes |
| 585 | No  | Standard | Female | 10.38108 | 14.06045 | < 12mo | >=12mo | Yes |
| 586 | No  | Reduced  | Female | 11.13666 | 12.97635 | < 12mo | >=12mo | Yes |
| 587 | Yes | Standard | Male   | 14.25756 | 16.3272  | >=12mo | >=12mo | Yes |
| 588 | No  | Reduced  | Female | 9.986859 | 11.59658 | < 12mo | < 12mo | Yes |
| 589 | Yes | Standard | Female | 7.457293 | 10.21682 | < 12mo | < 12mo | Yes |
| 590 | Yes | Reduced  | Female | 20.76216 | 22.37188 | >=12mo | >=12mo | Yes |
| 591 | No  | Reduced  | Male   | 25.32852 | 26.70828 | >=12mo | >=12mo | No  |
| 592 | No  | Reduced  | Female | 11.66229 | 12.81209 | < 12mo | >=12mo | Yes |
| 593 | No  | Standard | Female | 36       | 38       | >=12mo | >=12mo | No  |
| 594 | No  | Standard | Female | 27.03679 | 27.95664 | >=12mo | >=12mo | No  |
| 595 | Yes | Standard | Female | 7.325887 | 9.625493 | < 12mo | < 12mo | Yes |
| 596 | No  | Standard | Female | 11.56373 | 12.25361 | < 12mo | >=12mo | Yes |
| 597 | No  | Standard | Female | 24       | 26       | >=12mo | >=12mo | Yes |
| 598 | No  | Reduced  | Male   | 9.231275 | 12.91064 | < 12mo | >=12mo | Yes |
| 599 | No  | Standard | Female | 23.81735 | 24.27727 | >=12mo | >=12mo | No  |
| 600 | No  | Reduced  | Male   | 19.87516 | 21.02497 | >=12mo | >=12mo | Yes |
| 601 | No  | Reduced  | Male   | 31.01183 | 31.70171 | >=12mo | >=12mo | No  |
| 602 | No  | Reduced  | Male   | 48       | 49       | >=12mo | >=12mo | No  |
| 603 | No  | Standard | Female | 29.10644 | 30.02628 | >=12mo | >=12mo | No  |
| 604 | No  | Reduced  | Male   | 48       | 50       | >=12mo | >=12mo | No  |
| 605 | Yes | Reduced  | Male   | 19.77661 | 23.45598 | >=12mo | >=12mo | No  |
| 606 | No  | Reduced  | Male   | 24.11301 | 25.26281 | >=12mo | >=12mo | No  |
| 607 | Yes | Standard | Female | 11.26807 | 13.56767 | < 12mo | >=12mo | Yes |
| 608 | No  | Reduced  | Male   | 11.9908  | 14.06045 | < 12mo | >=12mo | No  |
| 609 | No  | Standard | Female | 7.227333 | 10.9067  | < 12mo | < 12mo | Yes |
| 610 | No  | Standard | Female | 10.64389 | 14.32326 | < 12mo | >=12mo | Yes |
| 611 | No  | Standard | Male   | 7.358738 | 11.03811 | < 12mo | < 12mo | Yes |

|     |     |          |        |          |          |        |        |     |
|-----|-----|----------|--------|----------|----------|--------|--------|-----|
| 612 | No  | Standard | Male   | 7.555848 | 8.70565  | < 12mo | < 12mo | Yes |
| 613 | No  | Reduced  | Male   | 7.851511 | 9.461235 | < 12mo | < 12mo | Yes |
| 614 | No  | Standard | Male   | 15.76873 | 16.91853 | >=12mo | >=12mo | Yes |
| 615 | Yes | Reduced  | Male   | 12.31932 | 15.76873 | >=12mo | >=12mo | Yes |
| 616 | Yes | Reduced  | Male   | 9.822602 | 10.74244 | < 12mo | < 12mo | Yes |
| 617 | Yes | Standard | Female | 8.47569  | 9.625493 | < 12mo | < 12mo | Yes |
| 618 | Yes | Standard | Male   | 29       | 33       | >=12mo | >=12mo | No  |
| 619 | Yes | Reduced  | Male   | 7.720105 | 10.47963 | < 12mo | < 12mo | Yes |
| 620 | No  | Reduced  | Female | 13.89619 | 15.73587 | >=12mo | >=12mo | No  |
| 621 | Yes | Standard | Female | 9.067018 | 12.74639 | < 12mo | >=12mo | Yes |
| 622 | Yes | Reduced  | Male   | 11.30092 | 12.91064 | < 12mo | >=12mo | Yes |
| 623 | No  | Standard | Male   | 6.208936 | 8.968463 | < 12mo | < 12mo | Yes |
| 624 | No  | Reduced  | Male   | 9.691196 | 13.1406  | < 12mo | >=12mo | Yes |
| 625 | Yes | Standard | Male   | 8.574245 | 11.33377 | < 12mo | < 12mo | Yes |
| 626 | No  | Standard | Female | 14.42181 | 16.2615  | >=12mo | >=12mo | Yes |
| 627 | No  | Reduced  | Male   | 9.724048 | 11.56373 | < 12mo | < 12mo | Yes |
| 628 | No  | Standard | Male   | 22.04336 | 22.50328 | >=12mo | >=12mo | No  |
| 629 | Yes | Standard | Male   | 16.65572 | 17.3456  | >=12mo | >=12mo | Yes |
| 630 | Yes | Reduced  | Male   | 17.44415 | 18.82392 | >=12mo | >=12mo | Yes |
| 631 | Yes | Reduced  | Female | 20.56505 | 22.17477 | >=12mo | >=12mo | Yes |
| 632 | Yes | Reduced  | Male   | 10.841   | 12.45072 | < 12mo | >=12mo | Yes |
| 633 | Yes | Reduced  | Female | 16.49146 | 17.64126 | >=12mo | >=12mo | Yes |
| 634 | Yes | Standard | Female | 7.785808 | 9.395533 | < 12mo | < 12mo | Yes |
| 635 | Yes | Reduced  | Female | 11.16951 | 12.77924 | < 12mo | >=12mo | Yes |
| 636 | No  | Standard | Female | 14.98029 | 16.59001 | >=12mo | >=12mo | No  |
| 637 | No  | Standard | Female | 12.97635 | 14.58607 | >=12mo | >=12mo | Yes |
| 638 | Yes | Reduced  | Female | 11.36662 | 15.04599 | < 12mo | >=12mo | Yes |
| 639 | Yes | Standard | Female | 29.13929 | 30.51905 | >=12mo | >=12mo | No  |
| 640 | Yes | Reduced  | Female | 7.293036 | 9.36268  | < 12mo | < 12mo | Yes |
| 641 | Yes | Standard | Male   | 6.241787 | 9.691196 | < 12mo | < 12mo | Yes |
| 642 | No  | Reduced  | Female | 15.07884 | 16.45861 | >=12mo | >=12mo | Yes |
| 643 | No  | Standard | Female | 6.767411 | 7.457293 | < 12mo | < 12mo | Yes |
| 644 | No  | Reduced  | Female | 6.044678 | 9.724048 | < 12mo | < 12mo | Yes |
| 645 | Yes | Standard | Female | 6.110381 | 9.329829 | < 12mo | < 12mo | Yes |
| 646 | Yes | Standard | Male   | 7.982917 | 10.74244 | < 12mo | < 12mo | Yes |
| 647 | Yes | Reduced  | Male   | 6.077529 | 8.147175 | < 12mo | < 12mo | Yes |
| 648 | Yes | Reduced  | Female | 16.3272  | 19.54665 | >=12mo | >=12mo | No  |
| 649 | No  | Standard | Female | 6.011827 | 7.39159  | < 12mo | < 12mo | Yes |
| 650 | Yes | Reduced  | Male   | 7.522996 | 10.28252 | < 12mo | < 12mo | Yes |
| 651 | Yes | Reduced  | Male   | 20.69645 | 23.45598 | >=12mo | >=12mo | Yes |
| 652 | Yes | Standard | Female | 6.800263 | 8.869908 | < 12mo | < 12mo | Yes |
| 653 | Yes | Reduced  | Male   | 8.541393 | 11.9908  | < 12mo | < 12mo | Yes |
| 654 | Yes | Standard | Male   | 11.82654 | 13.20631 | < 12mo | >=12mo | Yes |
| 655 | No  | Standard | Female | 7.851511 | 9.231275 | < 12mo | < 12mo | Yes |
| 656 | Yes | Standard | Female | 11.16951 | 12.54928 | < 12mo | >=12mo | Yes |
| 657 | Yes | Reduced  | Female | 8.508541 | 10.11827 | < 12mo | < 12mo | Yes |
| 658 | Yes | Standard | Female | 6.438896 | 9.428384 | < 12mo | < 12mo | Yes |
| 659 | Yes | Reduced  | Male   | 10.9067  | 14.12615 | < 12mo | >=12mo | Yes |
| 660 | No  | Reduced  | Female | 12.68068 | 14.98029 | >=12mo | >=12mo | Yes |
| 661 | Yes | Standard | Male   | 7.950066 | 11.62944 | < 12mo | < 12mo | Yes |
| 662 | Yes | Reduced  | Male   | 16.68857 | 18.29829 | >=12mo | >=12mo | Yes |

|     |     |          |        |          |          |        |        |     |
|-----|-----|----------|--------|----------|----------|--------|--------|-----|
| 663 | No  | Standard | Female | 12.54928 | 14.159   | >=12mo | >=12mo | Yes |
| 664 | Yes | Standard | Female | 16.03154 | 16.49146 | >=12mo | >=12mo | Yes |
| 665 | Yes | Reduced  | Male   | 7        | 9        | < 12mo | < 12mo | Yes |
| 666 | Yes | Standard | Female | 14.52037 | 15.90013 | >=12mo | >=12mo | Yes |
| 667 | Yes | Standard | Female | 8.70565  | 9.855454 | < 12mo | < 12mo | Yes |
| 668 | Yes | Reduced  | Male   | 19.08673 | 19.77661 | >=12mo | >=12mo | No  |
| 669 | Yes | Reduced  | Female | 6.833114 | 7.522996 | < 12mo | < 12mo | Yes |
| 670 | Yes | Reduced  | Male   | 9.067018 | 11.36662 | < 12mo | < 12mo | Yes |
| 671 | Yes | Standard | Female | 7.588699 | 9.888305 | < 12mo | < 12mo | Yes |
| 672 | Yes | Reduced  | Female | 7.325887 | 8.70565  | < 12mo | < 12mo | Yes |
| 673 | Yes | Standard | Female | 6.668857 | 8.278581 | < 12mo | < 12mo | Yes |
| 674 | Yes | Standard | Male   | 6.274639 | 9.954008 | < 12mo | < 12mo | Yes |
| 675 | Yes | Standard | Male   | 25       | 27       | >=12mo | >=12mo | No  |
| 676 | Yes | Reduced  | Male   | 17.64126 | 18.79107 | >=12mo | >=12mo | Yes |
| 677 | Yes | Reduced  | Male   | 6.668857 | 10.34823 | < 12mo | < 12mo | Yes |
| 678 | Yes | Reduced  | Male   | 6.668857 | 10.34823 | < 12mo | < 12mo | Yes |
| 679 | Yes | Standard | Male   | 10.01971 | 10.93955 | < 12mo | < 12mo | Yes |
| 680 | Yes | Standard | Female | 10.80815 | 14.48752 | < 12mo | >=12mo | Yes |
| 681 | Yes | Reduced  | Female | 12.25361 | 13.63338 | >=12mo | >=12mo | Yes |
| 682 | Yes | Standard | Female | 21.51774 | 22.20762 | >=12mo | >=12mo | No  |
| 683 | Yes | Reduced  | Female | 8.968463 | 9.888305 | < 12mo | < 12mo | Yes |
| 684 | Yes | Standard | Female | 11.79369 | 12.71353 | < 12mo | >=12mo | Yes |
| 685 | No  | Reduced  | Male   | 7.81866  | 9.658344 | < 12mo | < 12mo | Yes |
| 686 | Yes | Standard | Female | 7.227333 | 9.756899 | < 12mo | < 12mo | Yes |
| 687 | No  | Reduced  | Male   | 7.81866  | 11.49803 | < 12mo | < 12mo | Yes |
| 688 | Yes | Standard | Male   | 6.701708 | 7.851511 | < 12mo | < 12mo | Yes |
| 689 | No  | Reduced  | Male   | 20.20368 | 21.8134  | >=12mo | >=12mo | Yes |
| 690 | No  | Reduced  | Female | 7.687254 | 8.377135 | < 12mo | < 12mo | Yes |
| 691 | Yes | Reduced  | Male   | 10.80815 | 12.41787 | < 12mo | >=12mo | Yes |
| 692 | No  | Standard | Male   | 10.64389 | 12.25361 | < 12mo | >=12mo | Yes |
| 693 | Yes | Standard | Female | 11       | 13       | < 12mo | >=12mo | Yes |
| 694 | Yes | Standard | Male   | 12.45072 | 15.67017 | >=12mo | >=12mo | Yes |
| 695 | Yes | Reduced  | Male   | 10.87385 | 12.02365 | < 12mo | >=12mo | Yes |
| 696 | Yes | Standard | Female | 7.851511 | 10.61104 | < 12mo | < 12mo | Yes |
| 697 | No  | Reduced  | Female | 7.982917 | 10.51248 | < 12mo | < 12mo | Yes |
| 698 | Yes | Standard | Female | 11.59658 | 14.12615 | < 12mo | >=12mo | Yes |
| 699 | Yes | Reduced  | Male   | 13       | 14       | >=12mo | >=12mo | Yes |
| 700 | Yes | Standard | Male   | 8.508541 | 9.658344 | < 12mo | < 12mo | Yes |
| 701 | No  | Standard | Female | 17.11564 | 19.41524 | >=12mo | >=12mo | Yes |
| 702 | Yes | Reduced  | Male   | 8.804205 | 10.18397 | < 12mo | < 12mo | Yes |
| 703 | Yes | Standard | Male   | 12.15506 | 13.53482 | >=12mo | >=12mo | Yes |
| 704 | No  | Reduced  | Male   | 9        | 11       | < 12mo | < 12mo | Yes |
| 705 | Yes | Standard | Male   | 9.954008 | 12.02365 | < 12mo | >=12mo | Yes |
| 706 | No  | Reduced  | Male   | 9.231275 | 12.91064 | < 12mo | >=12mo | Yes |
| 707 | Yes | Reduced  | Female | 8.869908 | 10.70959 | < 12mo | < 12mo | Yes |
| 708 | Yes | Reduced  | Female | 11.33377 | 12.48357 | < 12mo | >=12mo | Yes |
| 709 | Yes | Reduced  | Female | 6.997372 | 10.67674 | < 12mo | < 12mo | Yes |
| 710 | Yes | Standard | Female | 9.888305 | 11.03811 | < 12mo | < 12mo | Yes |
| 711 | Yes | Standard | Male   | 24.44153 | 26.51117 | >=12mo | >=12mo | Yes |
| 712 | No  | Reduced  | Male   | 5.978975 | 9.428384 | < 12mo | < 12mo | Yes |
| 713 | No  | Reduced  | Female | 5.946124 | 9.625493 | < 12mo | < 12mo | Yes |

|     |     |          |        |          |          |        |        |     |
|-----|-----|----------|--------|----------|----------|--------|--------|-----|
| 714 | Yes | Reduced  | Female | 11.76084 | 13.37057 | < 12mo | >=12mo | Yes |
| 715 | No  | Reduced  | Male   | 12.15506 | 14.45467 | >=12mo | >=12mo | Yes |
| 716 | No  | Reduced  | Female | 9.724048 | 13.40342 | < 12mo | >=12mo | Yes |
| 717 | No  | Standard | Female | 22.27333 | 22.27333 | >=12mo | >=12mo | Yes |
| 718 | No  | Standard | Male   | 12.35217 | 14.65177 | >=12mo | >=12mo | Yes |
| 719 | No  | Standard | Male   | 36       | 36       | >=12mo | >=12mo | No  |
| 720 | No  | Standard | Male   | 12.61498 | 16.29435 | >=12mo | >=12mo | Yes |
| 721 | No  | Standard | Male   | 7.358738 | 9.888305 | < 12mo | < 12mo | Yes |
| 722 | No  | Reduced  | Female | 26.90539 | 28.77792 | >=12mo | >=12mo | No  |
| 723 | No  | Reduced  | Female | 6.044678 | 9.264126 | < 12mo | < 12mo | Yes |
| 724 | No  | Standard | Male   | 13.0092  | 15.76873 | >=12mo | >=12mo | Yes |
| 725 | No  | Reduced  | Female | 6.800263 | 10.47963 | < 12mo | < 12mo | Yes |
| 726 | No  | Reduced  | Male   | 6.701708 | 9.001314 | < 12mo | < 12mo | Yes |
| 727 | No  | Reduced  | Male   | 7.457293 | 8.837056 | < 12mo | < 12mo | Yes |
| 728 | No  | Standard | Male   | 6.767411 | 8.837056 | < 12mo | < 12mo | Yes |
| 729 | Yes | Reduced  | Male   | 13.89619 | 16.88568 | >=12mo | >=12mo | Yes |
| 730 | No  | Standard | Female | 11.26807 | 13.33771 | < 12mo | >=12mo | Yes |
| 731 | No  | Reduced  | Female | 8.90276  | 12.58213 | < 12mo | >=12mo | Yes |
| 732 | No  | Reduced  | Male   | 30.91327 | 33.21288 | >=12mo | >=12mo | Yes |
| 733 | Yes | Standard | Female | 27.85808 | 30.15769 | >=12mo | >=12mo | Yes |
| 734 | No  | Reduced  | Male   | 7.260184 | 7.720105 | < 12mo | < 12mo | Yes |
| 735 | Yes | Reduced  | Male   | 24       | 26       | >=12mo | >=12mo | Yes |
| 736 | No  | Standard | Male   | 6.701708 | 10.38108 | < 12mo | < 12mo | Yes |
| 737 | No  | Reduced  | Female | 42.77267 | 45.07227 | >=12mo | >=12mo | No  |
| 738 | Yes | Standard | Male   | 12.64783 | 13.56767 | >=12mo | >=12mo | Yes |
| 739 | Yes | Standard | Female | 24.86859 | 26.24836 | >=12mo | >=12mo | Yes |
| 740 | No  | Reduced  | Female | 27.26675 | 27.49672 | >=12mo | >=12mo | Yes |
| 741 | No  | Standard | Male   | 11.36662 | 12.0565  | < 12mo | >=12mo | Yes |
| 742 | No  | Reduced  | Male   | 19       | 20       | >=12mo | >=12mo | No  |
| 743 | Yes | Reduced  | Female | 6        | 9        | < 12mo | < 12mo | Yes |
| 744 | Yes | Reduced  | Female | 12       | 14       | >=12mo | >=12mo | Yes |
| 745 | Yes | Standard | Male   | 10.54534 | 11.23522 | < 12mo | < 12mo | Yes |
| 746 | Yes | Standard | Male   | 9.822602 | 10.74244 | < 12mo | < 12mo | Yes |
| 747 | No  | Standard | Male   | 7.654402 | 11.33377 | < 12mo | < 12mo | Yes |
| 748 | Yes | Reduced  | Male   | 24.63863 | 26.47832 | >=12mo | >=12mo | Yes |
| 749 | No  | Reduced  | Female | 9.264126 | 11.33377 | < 12mo | < 12mo | Yes |
| 750 | Yes | Standard | Female | 6.701708 | 10.38108 | < 12mo | < 12mo | Yes |
| 751 | Yes | Standard | Male   | 48       | 51       | >=12mo | >=12mo | No  |
| 752 | Yes | Standard | Female | 11.69514 | 13.0749  | < 12mo | >=12mo | Yes |
| 753 | No  | Reduced  | Female | 7.884363 | 10.64389 | < 12mo | < 12mo | Yes |
| 754 | Yes | Standard | Female | 6.537451 | 8.147175 | < 12mo | < 12mo | Yes |
| 755 | Yes | Standard | Female | 36       | 37       | >=12mo | >=12mo | No  |
| 756 | No  | Reduced  | Male   | 11.23522 | 12.61498 | < 12mo | >=12mo | Yes |
| 757 | Yes | Reduced  | Male   | 6.800263 | 8.180026 | < 12mo | < 12mo | No  |
| 758 | Yes | Standard | Male   | 15.53877 | 17.37845 | >=12mo | >=12mo | No  |
| 759 | No  | Reduced  | Male   | 25.75559 | 26.44547 | >=12mo | >=12mo | Yes |
| 760 | Yes | Reduced  | Female | 28.21945 | 29.82917 | >=12mo | >=12mo | No  |
| 761 | Yes | Standard | Female | 24.24442 | 25.85414 | >=12mo | >=12mo | Yes |
| 762 | Yes | Standard | Male   | 14.81603 | 18.03548 | >=12mo | >=12mo | Yes |
| 763 | Yes | Standard | Female | 16.88568 | 18.72536 | >=12mo | >=12mo | Yes |
| 764 | Yes | Standard | Male   | 18.92247 | 20.76216 | >=12mo | >=12mo | Yes |

|     |     |          |        |          |          |        |        |     |
|-----|-----|----------|--------|----------|----------|--------|--------|-----|
| 765 | No  | Standard | Male   | 11.20237 | 12.12221 | < 12mo | >=12mo | Yes |
| 766 | Yes | Reduced  | Male   | 6.865966 | 10.31537 | < 12mo | < 12mo | Yes |
| 767 | No  | Reduced  | Male   | 10.41393 | 14.0933  | < 12mo | >=12mo | Yes |
| 768 | No  | Reduced  | Male   | 10.38108 | 14.06045 | < 12mo | >=12mo | Yes |
| 769 | No  | Reduced  | Male   | 8.114324 | 11.79369 | < 12mo | < 12mo | Yes |
| 770 | No  | Standard | Male   | 21.35348 | 25.03285 | >=12mo | >=12mo | Yes |
| 771 | No  | Reduced  | Female | 7.260184 | 10.93955 | < 12mo | < 12mo | Yes |
| 772 | No  | Reduced  | Female | 14.98029 | 16.81997 | >=12mo | >=12mo | Yes |
| 773 | Yes | Standard | Female | 18.52825 | 21.28778 | >=12mo | >=12mo | Yes |
| 774 | Yes | Reduced  | Female | 10.9067  | 12.97635 | < 12mo | >=12mo | Yes |
| 775 | No  | Standard | Male   | 9        | 12       | < 12mo | >=12mo | Yes |
| 776 | No  | Reduced  | Female | 8.47569  | 12.15506 | < 12mo | >=12mo | Yes |
| 777 | No  | Standard | Female | 7.293036 | 10.28252 | < 12mo | < 12mo | Yes |
| 778 | Yes | Standard | Male   | 55.91327 | 59.59264 | >=12mo | >=12mo | No  |
| 779 | No  | Reduced  | Male   | 30.58476 | 34.26413 | >=12mo | >=12mo | No  |
| 780 | No  | Reduced  | Male   | 24.63863 | 28.318   | >=12mo | >=12mo | No  |
| 781 | No  | Reduced  | Male   | 56       | 58       | >=12mo | >=12mo | No  |
| 782 | Yes | Standard | Male   | 13.30486 | 16.98423 | >=12mo | >=12mo | Yes |
| 783 | Yes | Standard | Male   | 20.79501 | 23.55453 | >=12mo | >=12mo | Yes |
| 784 | Yes | Standard | Male   | 42.93692 | 43.85677 | >=12mo | >=12mo | No  |
| 785 | No  | Reduced  | Male   | 7.720105 | 11.16951 | < 12mo | < 12mo | Yes |
| 786 | Yes | Standard | Male   | 8.968463 | 11.26807 | < 12mo | < 12mo | Yes |
| 787 | Yes | Reduced  | Male   | 20.82786 | 24.27727 | >=12mo | >=12mo | Yes |
| 788 | Yes | Reduced  | Female | 11.36662 | 13.43627 | < 12mo | >=12mo | Yes |
| 789 | Yes | Standard | Male   | 22.86465 | 25.16426 | >=12mo | >=12mo | Yes |
| 790 | Yes | Standard | Male   | 11.9251  | 13.99474 | < 12mo | >=12mo | Yes |
| 791 | Yes | Reduced  | Male   | 20.00657 | 21.84625 | >=12mo | >=12mo | Yes |
| 792 | No  | Standard | Male   | 19.02103 | 20.86071 | >=12mo | >=12mo | Yes |
| 793 | Yes | Standard | Female | 7.522996 | 10.28252 | < 12mo | < 12mo | Yes |
| 794 | Yes | Reduced  | Female | 36       | 37       | >=12mo | >=12mo | No  |
| 795 | No  | Reduced  | Female | 7.522996 | 11.20237 | < 12mo | < 12mo | Yes |
| 796 | Yes | Reduced  | Female | 20       | 23       | >=12mo | >=12mo | Yes |
| 797 | Yes | Reduced  | Male   | 20.43364 | 23.19317 | >=12mo | >=12mo | No  |
| 798 | Yes | Standard | Male   | 19.05388 | 22.27333 | >=12mo | >=12mo | Yes |
| 799 | No  | Standard | Male   | 23.71879 | 25.32852 | >=12mo | >=12mo | Yes |
| 800 | Yes | Reduced  | Male   | 13.60053 | 17.2799  | >=12mo | >=12mo | Yes |
| 801 | Yes | Standard | Male   | 14.159   | 16.45861 | >=12mo | >=12mo | Yes |



| breastf_ex | team   | weight_ad | height_ad | muac_ad | weight_ex | height_ex | muac_ex | Cob_adm |
|------------|--------|-----------|-----------|---------|-----------|-----------|---------|---------|
| Yes        | Team 2 | 6.65      | 66.65     | 114.5   | 7.35      | 67.4      | 130.5   |         |
| Yes        | Team 2 | 7         | 75.9      | 119.5   | 8.35      | 78.45     | 133.5   |         |
| Yes        | Team 2 | 5.05      | 61.2      | 105.5   | 6.3       | 66.5      | 119     |         |
| Yes        | Team 2 | 7.25      | 73.95     | 119.5   | 8.45      | 76.95     | 126.5   | 204.476 |
| Yes        | Team 2 | 6         | 68.35     | 116     | 7.5       | 71.45     | 131.5   |         |
| Yes        | Team 2 | 4.75      | 64        | 98      | 5.6       | 68.05     | 109     |         |
| Yes        | Team 2 | 6.15      | 70.65     | 111.5   | 7.35      | 72.25     | 127.5   |         |
| Yes        | Team 2 | 6.75      | 71.95     | 111.5   | 8.15      | 75.45     | 127.5   |         |
| Yes        | Team 2 | 5.85      | 71.85     | 113.5   |           |           |         |         |
| Yes        | Team 1 | 5.1       | 62.4      | 110.5   | 6.05      | 66.75     | 117.5   |         |
| No         | Team 2 | 9.2       | 95        | 99.5    | 11.9      | 96.35     | 136.5   |         |
| Yes        | Team 2 | 6.7       | 73.45     | 108     | 7.3       | 76.85     | 113.5   |         |
| Yes        | Team 2 | 5.05      | 61.75     | 108.5   | 6.3       | 65.45     | 125.5   | 90.118  |
| No         | Team 2 | 7.55      | 77.15     | 114.5   | 8.55      | 78        | 130.5   |         |
| No         | Team 2 | 10.2      | 92.7      | 131.5   | 11.4      | 93.45     | 140.5   |         |
| No         | Team 2 | 8         | 79.45     | 114.5   | 8.9       | 80.25     | 129.5   |         |
| No         | Team 2 | 10.1      | 93.3      | 132.5   | 11.2      | 93.25     | 140.5   |         |
| Yes        | Team 2 | 5.25      | 61.75     | 112.5   | 5.95      | 63.85     | 125.5   |         |
| No         | Team 2 | 8.15      | 82.25     | 123.5   | 8.8       | 83.4      | 128.5   |         |
| No         | Team 2 | 7.55      | 74.85     | 114.5   | 8.4       | 75.65     | 130.5   |         |
| No         | Team 1 | 7         | 75.15     | 116     | 8.4       | 75.7      | 128     |         |
| Yes        | Team 2 | 5.05      | 61.45     | 113.5   | 6.6       | 63.65     | 127.5   | 179.304 |
| Yes        | Team 2 | 8.6       | 82.95     | 128.5   | 9.9       | 83.95     | 135.5   | 159.257 |
| Yes        | Team 2 | 5.4       | 64.75     | 109.5   | 6         | 66.85     | 117     |         |
| No         | Team 2 | 6.25      | 68.15     | 113.5   | 6.3       | 68.35     | 116.5   |         |
| Yes        | Team 2 | 5.85      | 66.3      | 115.5   | 7.65      | 69.95     | 134.5   | 153.361 |
| No         | Team 2 | 8.25      | 80.95     | 113.5   | 9.9       | 83.95     | 133.5   | 295.434 |
| No         | Team 2 | 9.9       | 90.05     | 129.5   | 12        | 90        | 145.5   | 174.934 |
| No         | Team 2 | 7.6       | 78.35     | 114.5   | 9.6       | 81.05     | 136.5   | 630.073 |
| Yes        | Team 2 | 5.2       | 63.35     | 112.5   | 6.1       | 68.35     | 116.5   | 98.024  |
| Yes        | Team 2 | 7         | 72.95     | 124     | 8         | 74.45     | 140     | 150.534 |
| No         | Team 1 | 5.5       | 65.5      | 119     | 6.45      | 70.55     | 121     |         |
| Yes        | Team 2 | 7.6       | 78.6      | 113.5   | 8.8       | 80.45     | 126.5   | 177.703 |
| No         | Team 2 | 9.1       | 90.05     | 118.5   | 10.4      | 93.15     | 130     | 256.31  |
| Yes        | Team 2 | 5.8       | 66.95     | 116.5   | 7.35      | 69.85     | 133.5   | 54.231  |
| No         | Team 2 | 7.55      | 78.75     | 116.5   | 8.95      | 79.45     | 141     | 463.067 |
| Yes        | Team 2 | 6.2       | 70.65     | 110.5   | 7.6       | 71.65     | 132.5   | 225.209 |
| Yes        | Team 2 | 6.35      | 72.35     | 104.5   | 7         | 74.75     | 125.5   | 96.994  |
| Yes        | Team 2 | 7.25      | 72.25     | 113.5   | 7.75      | 74.55     | 122.5   | 192.183 |
| Yes        | Team 2 | 5.7       | 67.45     | 105.5   | 7.75      | 72.35     | 134.5   | 94.852  |
| No         | Team 2 | 7.45      | 74.75     | 116.5   | 8.85      | 75.65     | 139.5   | 830.527 |
| Yes        | Team 2 | 6.15      | 68.75     | 113.5   | 7.5       | 70.25     | 131.5   | 168.227 |
| No         | Team 1 | 5.5       | 64.5      | 114     | 6.4       | 68.05     | 121.5   |         |
| No         | Team 2 | 7         | 71.45     | 114.5   | 6.45      | 71.75     | 109.5   |         |
| Yes        | Team 2 | 5         | 61.85     | 114.5   | 6         | 64.45     | 126.5   |         |
| No         | Team 2 | 6.95      | 75.25     | 115     | 8.2       | 77        | 127.5   | 327.508 |
| Yes        | Team 2 | 6.45      | 72.45     | 109.5   | 7.5       | 75.7      | 122     | 176.335 |
| Yes        | Team 2 | 5.95      | 69.45     | 104.5   | 8.3       | 72.75     | 135.5   | 233.034 |
| No         | Team 2 | 8.4       | 82.05     | 118.5   | 9.6       | 85.4      | 128.5   | 330.324 |
| No         | Team 2 | 9.55      | 86.9      | 127.5   | 12.1      | 87.25     | 149.5   | 254.66  |

|     |        |      |        |       |      |        |       |         |
|-----|--------|------|--------|-------|------|--------|-------|---------|
| Yes | Team 2 | 6.45 | 70.95  | 119.5 | 7.8  | 72.25  | 132.5 | 145.519 |
| Yes | Team 2 | 7.35 | 72.25  | 112.5 | 8.2  | 73.8   | 130.5 | 96.893  |
| Yes | Team 2 | 8.1  | 78.75  | 111.5 | 9.6  | 80.95  | 133.5 | 83.741  |
| Yes | Team 1 | 6.15 | 63     | 113.5 | 7.1  | 68.2   | 128   |         |
| Yes | Team 2 | 5.85 | 67.25  | 111.5 | 7.6  | 71.95  | 132.5 | 222.572 |
| Yes | Team 2 | 6.2  | 69.65  | 124.5 | 7.25 | 73     | 134.5 | 181.466 |
| Yes | Team 2 | 4.85 | 59.1   | 108.5 | 6    | 61.35  | 126.5 |         |
| No  | Team 2 | 13.1 | 107.45 | 130.5 | 12.9 | 108.15 | 132.5 | 238.832 |
| Yes | Team 2 | 5.9  | 66.95  | 114.5 | 6.4  | 67.25  | 117.5 |         |
| No  | Team 2 | 7.15 | 77.55  | 123.5 | 8.05 | 79.85  | 134.5 |         |
| Yes | Team 2 | 4.4  | 60     | 98.5  | 5.5  | 64.55  | 110.5 | 95.857  |
| Yes | Team 2 | 5.75 | 65.2   | 119.5 | 6.85 | 69     | 126.5 | 170.909 |
| Yes | Team 2 | 6.45 | 72.4   | 114.5 | 7    | 75.35  | 121.5 |         |
| No  | Team 2 | 8.15 | 79.95  | 122.5 | 9.2  | 80.9   | 135   | 312.55  |
| No  | Team 1 | 5.4  | 65.4   | 106   | 5.85 | 68.25  | 113.5 |         |
| No  | Team 2 | 7.9  | 80.65  | 123.5 | 9    | 82.75  | 136   |         |
| Yes | Team 2 | 5.75 | 67.1   | 112.5 | 6.9  | 68.25  | 129.5 | 309.202 |
| Yes | Team 2 | 4.4  | 63.2   | 98.5  | 5.65 | 65.45  | 113.5 |         |
| Yes | Team 2 | 5.3  | 64.4   | 116.5 | 6.3  | 65.25  | 127.5 | 175.012 |
| Yes | Team 2 | 7.1  | 74.75  | 123.5 | 8.65 | 75.95  | 141.5 | 222.28  |
| No  | Team 2 | 5.45 | 64.95  | 113.5 | 6.8  | 67.45  | 126   | 385.865 |
| Yes | Team 2 | 6.35 | 71.95  | 112.5 | 7.7  | 73.25  | 129.5 | 219.812 |
| Yes | Team 2 | 5.65 | 66.95  | 110.5 | 7.3  | 69     | 127.5 | 306.212 |
| Yes | Team 2 | 7.5  | 77.45  | 113.5 | 9.4  | 78.2   | 142.5 | 65.748  |
| Yes | Team 2 | 4.7  | 63.45  | 102.5 | 6.3  | 67.75  | 125.5 | 213.568 |
| Yes | Team 1 | 5.2  | 63.2   | 112   | 6.2  | 68.4   | 118   |         |
| Yes | Team 2 | 6.05 | 69.35  | 106.5 | 7.4  | 73.35  | 125   | 159.86  |
| No  | Team 2 | 7.3  | 76.25  | 125.5 | 8.5  | 77.45  | 133.5 |         |
| Yes | Team 2 | 5.3  | 64.95  | 112.5 | 6.3  | 66.25  | 125.5 | 196.3   |
| Yes | Team 2 | 7.45 | 78.25  | 121.5 | 8.7  | 79.95  | 132.5 | 406.534 |
| No  | Team 2 | 7.5  | 71.95  | 113.5 |      |        |       |         |
| Yes | Team 2 | 5.45 | 66.45  | 112.5 | 6.15 | 68     | 117   |         |
| Yes | Team 1 | 5.2  | 64.5   | 114   | 6.8  | 66.5   | 136   |         |
| Yes | Team 1 | 4.3  | 59.3   | 113   | 5.4  | 64.45  | 116.5 |         |
| No  | Team 1 | 4.9  | 61     | 107   | 5.05 | 64.25  | 111   |         |
| Yes | Team 1 | 5.5  | 65.75  | 107   | 6.6  | 70.2   | 115.5 |         |
| Yes | Team 1 | 4.65 | 60.15  | 110   | 4.2  | 60.95  | 101   |         |
| No  | Team 1 | 5.9  | 68     | 111   | 7.55 | 70.25  | 130.5 |         |
| Yes | Team 1 | 5.3  | 61.95  | 112   | 6.55 | 64.75  | 131.5 |         |
| Yes | Team 1 | 5.1  | 62.45  | 113.5 | 6    | 67.5   | 116.5 |         |
| No  | Team 1 | 5.35 | 61     | 113.5 | 5.7  | 62.15  | 117.5 |         |
| Yes | Team 1 | 6.4  | 67.5   | 112.5 | 7.5  | 68.85  | 133.5 | 60.861  |
| Yes | Team 1 | 6.9  | 73     | 123.5 | 8.65 | 73.9   | 140.5 | 209.393 |
| No  | Team 1 | 7.4  | 76.8   | 113.5 |      |        |       |         |
| Yes | Team 1 | 5.45 | 62.25  | 110.5 | 6.4  | 64     | 125   | 75.7    |
| Yes | Team 1 | 5.6  | 65.35  | 112.5 | 6.95 | 67     | 126.5 |         |
| No  | Team 1 | 7.7  | 77.95  | 116.5 | 8.4  | 80.05  | 121.5 |         |
| Yes | Team 1 | 6.05 | 68.95  | 113.5 | 7.75 | 72.7   | 134.5 | 176.525 |
| No  | Team 1 | 7.05 | 77     | 104.5 | 8.8  | 78.65  | 125.5 |         |
| No  | Team 1 | 5.15 | 63     | 110.5 | 5.8  | 64.35  | 118.5 |         |
| Yes | Team 1 | 4.85 | 61     | 101   | 6.95 | 65.5   | 127.5 | 158.909 |

|     |        |      |       |       |      |       |       |         |
|-----|--------|------|-------|-------|------|-------|-------|---------|
| Yes | Team 1 | 4.4  | 57.5  | 91.5  | 6.45 | 62.25 | 127.5 |         |
| Yes | Team 1 | 7.4  | 77.05 | 118.5 | 8.5  | 78.05 | 128.5 | 219.257 |
| Yes | Team 1 | 5.35 | 66.45 | 112   | 7    | 68    | 127.5 | 159.388 |
| Yes | Team 1 | 6    | 66.65 | 124.5 | 6.95 | 67.5  | 136.5 |         |
| Yes | Team 1 | 7    | 68.95 | 113.5 | 7.7  | 70.5  | 126   | 87.874  |
| No  | Team 1 | 5.85 | 65    | 114.5 | 6.25 | 67.9  | 114.5 |         |
| Yes | Team 1 | 4.15 | 58.15 | 97    | 6    | 65.5  | 114   | 164.148 |
| Yes | Team 1 | 5.8  | 65.55 | 117.5 | 7.1  | 69.5  | 126.5 | 174.004 |
| Yes | Team 1 | 5.7  | 67    | 114.5 | 7.35 | 71.65 | 135.5 | 138.741 |
| Yes | Team 1 | 5.2  | 61.2  | 113.5 | 5.8  | 64.2  | 118.5 | 281.631 |
| No  | Team 1 | 5    | 62.3  | 105   | 5.55 | 64    | 109   |         |
| Yes | Team 1 | 5.2  | 63    | 110   | 6.2  | 68.7  | 117   | 340.681 |
| Yes | Team 1 | 5.65 | 63    | 113.5 | 6.7  | 65.35 | 125   |         |
| Yes | Team 1 | 4.8  | 60.8  | 106.5 | 5.05 | 63    | 107   | 191.159 |
| Yes | Team 1 | 5.9  | 63.45 | 113.5 | 6.15 | 65    | 110.5 | 523.764 |
| Yes | Team 1 | 5.15 | 63.5  | 107.5 | 5.6  | 69.2  | 109   |         |
| Yes | Team 1 | 5    | 62    | 112.5 | 5.95 | 66.5  | 122.5 |         |
| Yes | Team 1 | 5.2  | 61.5  | 104.5 | 6.2  | 66.5  | 125   | 206.332 |
| Yes | Team 1 | 5.3  | 63.05 | 113.5 | 5.2  | 65    | 110.5 | 377.765 |
| Yes | Team 1 | 4.5  | 57.25 | 105   | 4.7  | 60.55 | 112.5 |         |
| Yes | Team 1 | 5.3  | 63.85 | 105.5 | 6.35 | 65.45 | 131.5 | 286.273 |
| Yes | Team 1 | 5.1  | 59.5  | 114   | 5.35 | 60.85 | 114.5 | 193.729 |
| Yes | Team 1 | 5.65 | 61.85 | 110   | 5.8  | 64.75 | 107   | 129.457 |
| Yes | Team 1 | 4.3  | 57    | 108   | 5.85 | 61    | 134.5 |         |
| Yes | Team 1 | 4.9  | 62.4  | 105   | 6.35 | 64.75 | 126.5 |         |
| Yes | Team 1 | 4.9  | 58.15 | 109.5 | 6.2  | 62.15 | 126.5 |         |
| Yes | Team 1 | 5.7  | 62.45 | 112.5 | 5.55 | 63.3  | 115.5 | 157.981 |
| Yes | Team 1 | 6.85 | 72.45 | 118.5 | 6.9  | 73.45 | 122.5 |         |
| Yes | Team 1 | 5.8  | 65.5  | 114.5 | 6.9  | 68.45 | 126   | 95.849  |
| Yes | Team 1 | 6.5  | 70.45 | 118.5 | 7.9  | 72.45 | 128.5 | 416.621 |
| Yes | Team 1 | 6.3  | 70.05 | 116   | 7.55 | 71.65 | 133   |         |
| Yes | Team 1 | 4.65 | 59.5  | 112.5 | 5.6  | 63.15 | 115.5 |         |
| No  | Team 1 | 7.8  | 77    | 114   | 8.8  | 79.35 | 125.5 | 318.767 |
| Yes | Team 1 | 5.5  | 65.5  | 114   | 7.1  | 66.5  | 134.5 |         |
| Yes | Team 1 | 6.5  | 71.1  | 119.5 | 8.1  | 73.35 | 133   | 81.236  |
| Yes | Team 1 | 6.85 | 72.95 | 112.5 | 8.4  | 74.65 | 132   | 337.486 |
| Yes | Team 1 | 5.1  | 63.2  | 113.5 | 6.55 | 64.65 | 133.5 | 204.548 |
| No  | Team 1 | 5.5  | 65.25 | 113.5 | 7    | 69    | 125.5 |         |
| Yes | Team 1 | 6.25 | 70    | 131   | 7.3  | 70.5  | 137   |         |
| No  | Team 1 | 6    | 65.65 | 113.5 | 6.15 | 66.5  | 120   |         |
| Yes | Team 1 | 4.5  | 61    | 90    | 5.4  | 65.2  | 105   | 140.644 |
| Yes | Team 1 | 6.15 | 68.95 | 110.5 | 7.85 | 71.15 | 133.5 | 133.234 |
| Yes | Team 1 | 5.75 | 70    | 105   | 6.75 | 72.25 | 113.5 | 485.561 |
| Yes | Team 1 | 5.2  | 61.45 | 107.5 | 5.2  | 62.65 | 106.5 |         |
| No  | Team 1 | 5.45 | 64.85 | 98.5  | 6    | 65.65 | 114.5 |         |
| Yes | Team 1 | 5.15 | 63    | 113.5 | 6.3  | 64.55 | 133.5 | 66.603  |
| Yes | Team 1 | 6.55 | 73    | 122.5 | 7.8  | 73.25 | 133.5 | 518.132 |
| Yes | Team 1 | 5.3  | 62.75 | 111   | 6.8  | 66.25 | 127.5 |         |
| Yes | Team 1 | 5.5  | 61    | 114   | 6.15 | 63.3  | 127   |         |
| No  | Team 1 | 5    | 60.3  | 108   | 5.95 | 65.2  | 119.5 |         |
| Yes | Team 1 | 7.4  | 73.3  | 114   | 8.8  | 73.5  | 130   |         |

|     |        |      |       |       |      |       |       |          |
|-----|--------|------|-------|-------|------|-------|-------|----------|
| Yes | Team 1 | 5.1  | 62    | 110.5 | 6.55 | 65.3  | 128.5 |          |
| Yes | Team 1 | 4.3  | 59.5  | 98    | 6    | 66.35 | 119   |          |
| No  | Team 1 | 7.3  | 74.5  | 110   | 8.1  | 75.7  | 125   |          |
| Yes | Team 1 | 4.7  | 62.1  | 106   | 6.1  | 67.45 | 116   |          |
| Yes | Team 1 | 5.5  | 64.6  | 111   | 6.6  | 70    | 116   |          |
| No  | Team 1 | 6.6  | 72.5  | 122   | 7    | 72.75 | 125.5 |          |
| Yes | Team 1 | 5.6  | 67    | 106.5 | 7.05 | 68.25 | 128.5 |          |
| Yes | Team 1 | 5.2  | 64.6  | 95    | 7.4  | 68.4  | 132.5 |          |
| Yes | Team 1 | 6.95 | 70.5  | 114   | 7.4  | 70.95 | 126.5 |          |
| Yes | Team 1 | 4.7  | 59.05 | 112.5 | 4.9  | 61.45 | 113.5 |          |
| No  | Team 1 | 8.2  | 80.1  | 124.5 | 9.5  | 81    | 140   |          |
| Yes | Team 1 | 5.75 | 65.05 | 111.5 | 5.95 | 66.5  | 117.5 |          |
| Yes | Team 1 | 4.9  | 60.95 | 110.5 | 5.15 | 62.6  | 112.5 |          |
| No  | Team 1 | 5.6  | 63.85 | 113.5 | 5.35 | 65.35 | 108   |          |
| No  | Team 1 | 5    | 65.5  | 99.5  | 5.5  | 66.35 | 108.5 |          |
| No  | Team 1 | 5.6  | 65.55 | 90.5  | 6.65 | 69.95 | 113   |          |
| Yes | Team 1 | 5.9  | 65.1  | 114.5 | 7.1  | 69.45 | 127.5 |          |
| Yes | Team 1 | 6.4  | 72.15 | 105.5 | 8.1  | 73    | 135.5 |          |
| Yes | Team 1 | 6.85 | 72.35 | 123.5 | 7.85 | 73.5  | 133   |          |
| Yes | Team 1 | 6.7  | 73    | 115.5 | 8.7  | 78.5  | 137.5 |          |
| Yes | Team 1 | 5.1  | 64.05 | 112.5 | 6.3  | 65.4  | 127.5 |          |
| Yes | Team 1 | 7.4  | 77.45 | 124   | 8.9  | 78.95 | 142   |          |
| Yes | Team 1 | 5.1  | 62.65 | 110   | 6.6  | 65.85 | 129.5 |          |
| Yes | Team 1 | 6.6  | 70.25 | 113.5 | 8.15 | 74.45 | 126.5 |          |
| Yes | Team 1 | 5.85 | 67.45 | 113.5 | 7.6  | 71.7  | 135   |          |
| Yes | Team 1 | 5.8  | 68.3  | 118   | 7.65 | 71    | 136.5 | 232.593  |
| Yes | Team 1 | 4.75 | 59.55 | 110   | 6    | 61.95 | 125.5 |          |
| Yes | Team 1 | 7.4  | 78.35 | 113.5 | 9.1  | 79    | 135   |          |
| No  | Team 1 | 6.3  | 71    | 115.5 | 7.1  | 72.65 | 124.5 |          |
| Yes | Team 1 | 5.5  | 65.45 | 112.5 | 6.45 | 69    | 120   |          |
| Yes | Team 1 | 4.7  | 62.35 | 104.5 | 6.4  | 66.6  | 125.5 |          |
| No  | Team 1 | 6.3  | 71.5  | 110   | 6.6  | 72.15 | 113.5 |          |
| Yes | Team 1 | 6.75 | 71    | 113.5 | 8.35 | 74.4  | 130.5 | 55.403   |
| Yes | Team 1 | 4.5  | 57.7  | 112   | 5.5  | 60    | 125.5 |          |
| No  | Team 1 | 7.55 | 74.5  | 112.5 | 8.5  | 77.6  | 122   |          |
| Yes | Team 1 | 7.15 | 69.5  | 114.5 | 8.3  | 72.6  | 126.5 | 177.01   |
| No  | Team 1 | 5.6  | 66    | 111.5 | 6.05 | 66.95 | 120.5 |          |
| Yes | Team 1 | 5.85 | 67.35 | 104.5 | 7.85 | 70.4  | 126   |          |
| Yes | Team 1 | 6.05 | 65.15 | 113.5 | 7.2  | 67.25 | 130.5 | 133.925  |
| No  | Team 1 | 6.35 | 69    | 112.5 | 7.8  | 70.45 | 134.5 | 163.406  |
| No  | Team 1 | 5.45 | 69.2  | 105   | 7.15 | 71.95 | 123   |          |
| Yes | Team 1 | 6.6  | 71.4  | 113.5 | 8    | 74.45 | 128.5 | 107.4175 |
| Yes | Team 1 | 6.3  | 65    | 113.5 | 7.55 | 67.35 | 130.5 | 116.122  |
| No  | Team 1 | 6.3  | 70.75 | 117   | 6.75 | 71.7  | 119.5 |          |
| Yes | Team 1 | 5.5  | 63.4  | 112.5 | 6.8  | 67.5  | 127.5 | 145.493  |
| No  | Team 1 | 6.7  | 78    | 105.5 | 8.1  | 78.15 | 118.5 |          |
| Yes | Team 1 | 6.5  | 72.05 | 115.5 | 8.35 | 76.5  | 133.5 | 99.609   |
| No  | Team 1 | 7.05 | 74.95 | 113.5 | 7    | 75.15 | 113.5 |          |
| No  | Team 1 | 7.2  | 75.45 | 113.5 | 8    | 75.65 | 124   |          |
| Yes | Team 1 | 5.5  | 64.45 | 108.5 | 6.5  | 69.45 | 113.5 | 140.225  |
| No  | Team 1 | 4.75 | 61.5  | 109.5 | 6.5  | 64.5  | 128.5 |          |

|     |        |      |       |       |      |       |       |         |
|-----|--------|------|-------|-------|------|-------|-------|---------|
| Yes | Team 1 | 7.3  | 74.2  | 121   | 7.55 | 75.5  | 121.5 | 299.666 |
| No  | Team 1 | 8.2  | 78.1  | 114.5 | 9.65 | 79.35 | 127.5 | 336.065 |
| No  | Team 1 | 5.85 | 66.35 | 108.5 | 7.05 | 70.65 | 126   |         |
| No  | Team 1 | 8.7  | 83.4  | 128   | 9.2  | 85    | 130   | 226.063 |
| Yes | Team 1 | 5.55 | 67    | 114.5 | 6.25 | 69.5  | 117.5 | 178.616 |
| Yes | Team 1 | 6.55 | 68    | 111.5 | 6.65 | 70    | 120.5 | 181.402 |
| Yes | Team 1 | 5.4  | 64.45 | 111.5 | 6.9  | 67.95 | 125   | 100.959 |
| Yes | Team 1 | 5.95 | 63.95 | 114.5 | 7.15 | 64.75 | 133.5 |         |
| Yes | Team 1 | 6.8  | 71.5  | 115.5 | 6.85 | 72.65 | 120   |         |
| No  | Team 1 | 8.6  | 85.45 | 120.5 | 10   | 89.4  | 130.5 | 239.57  |
| Yes | Team 1 | 5.05 | 64    | 106   | 6.6  | 70    | 121   |         |
| Yes | Team 1 | 5.65 | 67.8  | 110   |      | 70.75 | 114   |         |
| Yes | Team 1 | 5.8  | 62.75 | 114.5 | 6.1  | 63.2  | 119   |         |
| Yes | Team 1 | 4.4  | 61    | 112.5 | 4.8  | 61.5  | 112   |         |
| Yes | Team 1 | 5.2  | 63.6  | 111   | 6.75 | 67.05 | 125   |         |
| Yes | Team 1 | 6.1  | 65.3  | 112   | 7.6  | 65.9  | 131   |         |
| Yes | Team 1 | 6.9  | 75    | 111   | 9.4  | 75    | 144   | 160.063 |
| Yes | Team 1 | 6.2  | 67    | 120   | 7.3  | 67.55 | 133   |         |
| No  | Team 1 | 8.3  | 80    | 108   | 8.4  | 82.5  | 118   |         |
| Yes | Team 1 | 5.3  | 65.8  | 107   | 8.15 | 68.4  | 143   |         |
| Yes | Team 1 | 5.7  | 66.4  | 114   | 6.45 | 68.35 | 122   |         |
| Yes | Team 1 | 6.2  | 66.5  | 111   | 6.85 | 68.35 | 117   |         |
| Yes | Team 1 | 5.1  | 60    | 109   | 6.7  | 64.95 | 125   |         |
| Yes | Team 1 | 6.4  | 66.1  | 112.5 | 6.8  | 67.5  | 125   |         |
| Yes | Team 1 | 5.7  | 63.7  | 114   | 6.5  | 66.45 | 125.5 |         |
| Yes | Team 1 | 5.55 | 61.5  | 116   | 6.45 | 68.65 | 118.5 |         |
| Yes | Team 1 | 6.9  | 70.6  | 113   | 8.45 | 73.9  | 134.5 |         |
| No  | Team 1 | 5.35 | 62    | 112   | 5.85 | 65.35 | 118.5 |         |
| Yes | Team 1 | 6.5  | 70.1  | 111.5 | 7.6  | 71.5  | 131.5 |         |
| Yes | Team 1 | 4.05 | 57    | 97    | 5.55 | 60.75 | 127.5 |         |
| Yes | Team 1 | 5.5  | 63.3  | 111   | 5.6  | 64.25 | 109.5 |         |
| Yes | Team 1 | 4.2  | 62.9  | 98    | 6.55 | 66.85 | 128.5 |         |
| No  | Team 1 | 4.25 | 59.25 | 94.5  | 6.4  | 65.25 | 125.5 |         |
| Yes | Team 1 | 5.95 | 68.25 | 115.5 | 6.2  | 70.2  | 118.5 |         |
| No  | Team 1 | 7.5  | 79.65 | 114.5 | 9.2  | 82    | 127.5 |         |
| Yes | Team 1 | 5.4  | 60.65 | 111.5 |      |       |       |         |
| Yes | Team 1 | 6.05 | 67.35 | 111.5 | 7.2  | 70    | 129   |         |
| Yes | Team 1 | 5.15 | 63.55 | 102.5 | 7.55 | 70.7  | 126.5 |         |
| Yes | Team 1 | 3.95 | 56.3  | 94    | 6.3  | 61.95 | 126.5 |         |
| Yes | Team 1 | 5.6  | 64.3  | 112   | 7    | 70.5  | 121   |         |
| Yes | Team 1 | 4.8  | 61.45 | 110   | 7.1  | 64.05 | 141.5 |         |
| Yes | Team 1 | 4.9  | 63.25 | 108   | 6.1  | 66    | 128.5 |         |
| Yes | Team 1 | 5.4  | 64.95 | 107.5 | 6.85 | 66.55 | 130.5 |         |
| No  | Team 1 | 4.8  | 63.05 | 105   | 4.75 | 63.25 | 110.5 |         |
| No  | Team 1 | 5.2  | 63.45 | 110   | 5.45 | 64.85 | 109.5 |         |
| Yes | Team 1 | 4.3  | 60.45 | 106.5 |      |       |       |         |
| Yes | Team 1 | 5.3  | 60.9  | 110   | 6.75 | 65    | 125.5 | 523.736 |
| No  | Team 1 | 7.05 | 73.55 | 110.5 | 8.15 | 74.95 | 128   |         |
| Yes | Team 1 | 4.85 | 61.9  | 107   | 5.8  | 62.45 | 126.5 | 145.131 |
| Yes | Team 1 | 6.65 | 73.95 | 111   | 8.2  | 74.75 | 128.5 |         |
| Yes | Team 1 | 4.7  | 62.25 | 103.5 | 6.55 | 64.95 | 125.5 |         |

|     |        |      |       |       |      |       |       |         |
|-----|--------|------|-------|-------|------|-------|-------|---------|
| Yes | Team 1 | 5.6  | 64.7  | 113   | 5.8  | 67.25 | 118.5 |         |
| Yes | Team 1 | 6.05 | 67.35 | 112.5 | 7.75 | 71.7  | 134   | 187.276 |
| No  | Team 1 | 5.45 | 66.25 | 110.5 | 6.65 | 71    | 120   |         |
| Yes | Team 1 | 5.75 | 65.75 | 115.5 | 7.5  | 71.35 | 129.5 | 126.719 |
| No  | Team 1 | 6.6  | 70.75 | 115.5 | 7.1  | 71.85 | 122.5 |         |
| No  | Team 1 | 5.2  | 61.25 | 112.5 | 5.85 | 63.45 | 120.5 |         |
| Yes | Team 1 | 5.1  | 59.95 | 110.5 | 5    | 61.45 | 108.5 |         |
| Yes | Team 1 | 6.95 | 72.35 | 110.5 | 8.65 | 73.55 | 131.5 | 277.561 |
| Yes | Team 1 | 7.6  | 77    | 121.5 | 7.85 | 78.3  | 121.5 | 308.134 |
| Yes | Team 1 | 5.35 | 63.1  | 116.5 | 6.55 | 64.65 | 130.5 |         |
| Yes | Team 1 | 5.6  | 66.05 | 120   | 7    | 70.9  | 126.5 | 82.645  |
| Yes | Team 1 | 5    | 65.45 | 114.5 | 6.45 | 67    | 129.5 | 198.567 |
| Yes | Team 1 | 5.55 | 62    | 114.5 | 6.65 | 67.8  | 121   | 90.286  |
| Yes | Team 1 | 6.5  | 68.35 | 114.5 | 7.95 | 70.7  | 135.5 | 91.728  |
| No  | Team 1 | 7.2  | 75.5  | 110   | 8.65 | 76.7  | 127.5 | 210.896 |
| Yes | Team 1 | 5.2  | 61.5  | 110   | 6.55 | 65    | 129.5 |         |
| Yes | Team 1 | 6.2  | 66.55 | 114.5 | 6.7  | 68.55 | 125   | 146.686 |
| Yes | Team 1 | 7.35 | 71.45 | 113.5 | 7.4  | 74.15 | 117.5 | 197.028 |
| Yes | Team 1 | 5.6  | 63.9  | 113.5 | 6.35 | 64.85 | 126.5 | 204.109 |
| Yes | Team 1 | 5.7  | 64    | 114.5 | 6.5  | 66.4  | 125.5 | 157.253 |
| No  | Team 1 | 5.75 | 69.45 | 105.5 | 7.8  | 73.5  | 126.5 | 331.164 |
| Yes | Team 1 | 7.9  | 83.5  | 110.5 | 9.5  | 84.9  | 125   |         |
| No  | Team 1 | 7.25 | 73    | 114   | 8    | 72.75 | 130.5 | 233.502 |
| Yes | Team 1 | 5.65 | 63.45 | 114.5 | 6.65 | 64.9  | 133.5 | 122.849 |
| Yes | Team 1 | 5.9  | 66.5  | 116.5 | 7.2  | 68.8  | 131   | 195.999 |
| Yes | Team 1 | 6.35 | 70.45 | 117   | 7.7  | 74.95 | 125   | 111.397 |
| Yes | Team 1 | 7.15 | 74.4  | 127.5 | 8.4  | 74.85 | 140.5 | 88.42   |
| Yes | Team 1 | 6.3  | 69.95 | 113.5 | 7.5  | 72.45 | 131   |         |
| No  | Team 1 | 6.7  | 71    | 114   | 7.9  | 72.3  | 129.5 |         |
| No  | Team 1 | 5.75 | 68.45 | 110.5 | 6.2  | 69.55 | 115.5 | 204.024 |
| Yes | Team 1 | 4.05 | 57.25 | 95.5  | 5.7  | 61    | 125   | 462.618 |
| Yes | Team 1 | 6.4  | 68.85 | 114.5 | 7.65 | 70.65 | 125.5 | 121.928 |
| Yes | Team 1 | 5.5  | 65.05 | 112.5 | 6.55 | 66.05 | 131   | 110.129 |
| Yes | Team 1 | 5.4  | 63.5  | 111.5 | 6.35 | 65.5  | 125.5 | 132.5   |
| Yes | Team 1 | 5.65 | 68    | 111.5 | 7.45 | 73.45 | 126   | 363.843 |
| Yes | Team 1 | 5.65 | 64.05 | 113.5 | 6.15 | 66    | 117.5 | 108.863 |
| Yes | Team 1 | 6.4  | 70    | 109.5 | 8.3  | 72    | 134.5 | 111.12  |
| Yes | Team 1 | 7.05 | 74.45 | 114   | 9.1  | 76.05 | 133.5 | 93.771  |
| No  | Team 1 | 5    | 61    | 114   | 5.75 | 64.15 | 120.5 |         |
| No  | Team 1 | 10.4 | 93.15 | 126   | 11.7 | 96.2  | 136   | 240.553 |
| Yes | Team 1 | 8.3  | 82.45 | 118.5 | 9.4  | 81.75 | 130.5 | 276.616 |
| Yes | Team 1 | 7    | 73.45 | 113.5 | 7.6  | 74.5  | 125   | 257.105 |
| Yes | Team 1 | 6.05 | 68.25 | 115.5 | 7.9  | 72    | 132.5 | 551.357 |
| Yes | Team 1 | 9.1  | 89.05 | 125.5 | 11   | 91.5  | 140   |         |
| Yes | Team 1 | 5.95 | 66.95 | 112.5 | 7.25 | 69.5  | 130   | 115.57  |
| Yes | Team 1 | 6.2  | 67.95 | 113.5 | 6.85 | 69    | 125   | 183.747 |
| Yes | Team 1 | 6.95 | 72    | 122.5 | 7.9  | 76.2  | 127   | 261.257 |
| Yes | Team 1 | 5.2  | 60.75 | 112.5 | 6.3  | 66    | 125   | 497.141 |
| Yes | Team 1 | 3.9  | 56.85 | 96.5  | 3.7  | 57.25 | 89.5  |         |
| Yes | Team 1 | 6.1  | 64.65 | 112   | 6.85 | 65.55 | 125.5 | 261.332 |
| Yes | Team 1 | 4.6  | 61    | 103.5 | 6.6  | 66    | 125.5 | 228.993 |

|     |        |      |       |       |      |       |       |         |
|-----|--------|------|-------|-------|------|-------|-------|---------|
| Yes | Team 1 | 7.5  | 76    | 117.5 | 8.2  | 77.7  | 125   | 92.386  |
| No  | Team 1 | 5.55 | 64.35 | 117   | 6.4  | 66.2  | 122.5 |         |
| Yes | Team 1 | 5.8  | 65.95 | 117.5 | 6.7  | 67.6  | 129.5 |         |
| No  | Team 1 | 9    | 86.7  | 123   | 10.2 | 88.65 | 137.5 | 196.303 |
| Yes | Team 1 | 5.2  | 64    | 111.5 | 6.35 | 68.5  | 110   | 90.529  |
| No  | Team 1 | 5.2  | 63.3  | 112.5 | 5.4  | 63.5  | 117.5 |         |
| Yes | Team 1 | 5.55 | 60.05 | 114.5 | 6.4  | 63.85 | 126.5 | 148.438 |
| Yes | Team 1 | 4.95 | 60.85 | 104.5 | 6.8  | 64.35 | 125   | 198.589 |
| Yes | Team 1 | 6.2  | 68.2  | 113.5 | 7.25 | 68.75 | 128   | 93.184  |
| Yes | Team 1 | 5.55 | 63.65 | 114.5 | 6.5  | 66    | 125.5 | 279.397 |
| Yes | Team 1 | 4.7  | 58.75 | 111.5 | 6    | 63.2  | 125   | 215.537 |
| Yes | Team 1 | 7.6  | 73.95 | 114   | 8.7  | 75.45 | 125.5 | 368.545 |
| Yes | Team 1 | 5.75 | 65.25 | 113.5 | 5.6  | 65.65 | 113.5 | 174.768 |
| Yes | Team 1 | 5.5  | 61.35 | 112   | 5.55 | 63    | 115   | 267.39  |
| Yes | Team 1 | 5.2  | 61.4  | 106.5 | 6.65 | 65.5  | 126.5 | 167.988 |
| Yes | Team 1 | 7.2  | 73.1  | 120   | 8.55 | 74.65 | 130   | 108.267 |
| Yes | Team 1 | 5.6  | 67.15 | 111.5 | 6.8  | 68.25 | 130   |         |
| Yes | Team 1 | 6.6  | 71.85 | 119   | 8.85 | 73.15 | 155   |         |
| Yes | Team 1 | 7    | 72.25 | 110.5 | 8.6  | 73.45 | 134.5 | 63.032  |
| Yes | Team 1 | 4.8  | 60.45 | 110.5 |      |       |       |         |
| Yes | Team 1 | 4.6  | 60.5  | 110   | 6.2  | 65.1  | 125   |         |
| Yes | Team 1 | 5.65 | 64.35 | 114.5 | 6.6  | 67    | 125   | 391.73  |
| Yes | Team 1 | 5.55 | 67.4  | 114.5 | 7    | 70.15 | 130   | 73.69   |
| Yes | Team 1 | 5.75 | 66.25 | 110.5 | 6.45 | 68.8  | 120   |         |
| Yes | Team 1 | 5.8  | 64.3  | 113.5 | 6.75 | 65.95 | 125.5 | 219.531 |
| Yes | Team 1 | 7.2  | 74.15 | 116.5 | 8.35 | 75    | 130.5 | 126.359 |
| Yes | Team 1 | 6    | 67.3  | 116.5 | 7.5  | 69    | 134   |         |
| Yes | Team 1 | 6.4  | 67.5  | 113   | 7.65 | 72.75 | 126.5 |         |
| Yes | Team 1 | 6.7  | 71.5  | 114   | 8.1  | 75.55 | 125.5 |         |
| No  | Team 1 | 5.75 | 66.5  | 112   | 6.75 | 68.95 | 120.5 |         |
| Yes | Team 1 | 7.2  | 73.2  | 114   | 8.3  | 76.05 | 128.5 |         |
| Yes | Team 1 | 5.5  | 65.5  | 116   | 6.5  | 70.95 | 119.5 |         |
| Yes | Team 1 | 6.1  | 66.75 | 113.5 | 7.35 | 72.35 | 125.5 |         |
| Yes | Team 1 | 6.85 | 72.65 | 120   | 7.85 | 72.8  | 131.5 |         |
| Yes | Team 1 | 7.25 | 73.5  | 113   | 9.05 | 74.3  | 137   |         |
| Yes | Team 1 | 7.1  | 72.55 | 123.5 | 7.6  | 73.95 | 128.5 |         |
| Yes | Team 1 | 5.6  | 66.25 | 120.5 | 6.85 | 66.55 | 127.5 |         |
| Yes | Team 1 | 6.55 | 69.45 | 124.5 | 7.65 | 70.8  | 141   |         |
| Yes | Team 1 | 5.05 | 63.15 | 111   | 7.05 | 69    | 131.5 |         |
| No  | Team 1 | 7.7  | 79.45 | 112.5 | 8.1  | 82    | 114   |         |
| Yes | Team 1 | 5.9  | 64.45 | 111   | 6.85 | 69    | 120   |         |
| Yes | Team 1 | 6.9  | 71    | 114.5 | 7.95 | 72.95 | 125   | 137.364 |
| Yes | Team 1 | 6.75 | 71.65 | 114.5 | 8.25 | 73    | 135   | 99.114  |
| No  | Team 1 | 5.55 | 63.3  | 113.5 | 6.5  | 67.35 | 123.5 |         |
| Yes | Team 1 | 5.1  | 62.75 | 113.5 | 6.5  | 66.15 | 127.5 | 83.426  |
| No  | Team 1 | 5.2  | 62.35 | 109   | 5.5  | 62.7  | 113   |         |
| Yes | Team 1 | 5.8  | 68.8  | 105   | 7.5  | 70.65 | 127.5 | 639.597 |
| Yes | Team 1 | 6.05 | 66.45 | 113.5 | 7.7  | 71.4  | 130   |         |
| No  | Team 1 | 6.05 | 68.55 | 106   | 7.8  | 70.85 | 129.5 | 92.037  |
| Yes | Team 1 | 5.85 | 65.25 | 112.5 | 7.1  | 67.1  | 130.5 | 119.643 |
| No  | Team 1 | 9.5  | 88.55 | 114.5 | 10.9 | 88.85 | 125.5 | 655.942 |

|     |        |      |       |       |      |       |       |         |
|-----|--------|------|-------|-------|------|-------|-------|---------|
| No  | Team 1 | 6.4  | 70.35 | 103.5 | 8.9  | 72.7  | 132   |         |
| No  | Team 1 | 9.95 | 83.45 | 114.5 | 10.5 | 84.15 | 126.5 | 128.552 |
| Yes | Team 1 | 5.4  | 64.45 | 114.5 | 6.45 | 65.6  | 127   |         |
| Yes | Team 1 | 5.05 | 66.5  | 113.5 | 6.7  | 67.2  | 127   | 404.648 |
| No  | Team 1 | 4.7  | 62.25 | 105.5 | 5.9  | 65.5  | 120   |         |
| Yes | Team 1 | 5.95 | 68    | 111.5 | 7.2  | 67.95 | 126.5 | 270.919 |
| No  | Team 1 | 10.5 | 96.5  | 118   | 12.2 | 98.7  | 133   |         |
| No  | Team 1 | 8.8  | 86.6  | 120.5 | 8.1  | 86.65 | 119.5 |         |
| Yes | Team 1 | 6.2  | 69    | 113.5 | 6.85 | 71.85 | 122.5 | 79.92   |
| Yes | Team 1 | 6.2  | 66.5  | 112.5 | 5.85 | 68    | 109.5 | 105.913 |
| Yes | Team 1 | 5.35 | 64.1  | 110.5 | 6.5  | 65    | 125.5 | 242.717 |
| Yes | Team 1 | 4.9  | 58.3  | 112.5 | 5.75 | 63.6  | 119.5 | 139.919 |
| Yes | Team 1 | 5.6  | 67.6  | 112   | 5.9  | 68.65 | 111.5 | 261.346 |
| Yes | Team 1 | 6    | 65.45 | 112   | 7.6  | 66.85 | 132   | 172.895 |
| Yes | Team 1 | 5.8  | 65.7  | 114.5 | 7.1  | 70    | 120.5 | 306.988 |
| No  | Team 1 | 8    | 78.45 | 113.5 | 9.1  | 80.2  | 128   |         |
| Yes | Team 1 | 5.45 | 63.65 | 114.5 | 6.6  | 65.25 | 127.5 |         |
| Yes | Team 1 | 6.6  | 70.15 | 115.5 | 7.5  | 73.5  | 122.5 | 257.232 |
| Yes | Team 1 | 6.1  | 67.85 | 120.5 | 7.6  | 71.45 | 130.5 | 99.596  |
| Yes | Team 1 | 6.75 | 71.85 | 115   | 8.1  | 75    | 129   | 274.382 |
| Yes | Team 1 | 5.5  | 64.45 | 112.5 | 6.5  | 66.3  | 130   |         |
| No  | Team 1 | 7.6  | 75.5  | 110   | 8.1  | 76.8  | 122.5 |         |
| Yes | Team 1 | 6.45 | 71.5  | 114.5 | 7.75 | 72.45 | 130.5 |         |
| Yes | Team 1 | 5.35 | 61    | 114.5 | 6.3  | 65.25 | 125   |         |
| Yes | Team 1 | 6    | 66.65 | 116.5 | 6.95 | 67    | 131.5 |         |
| No  | Team 1 | 8.75 | 85.65 | 119.5 | 11.1 | 85.3  | 141.5 | 114.998 |
| Yes | Team 1 | 5.6  | 64.55 | 113.5 | 6.6  | 66.25 | 129.5 | 101.01  |
| Yes | Team 1 | 4.95 | 63.35 | 105.5 | 6.35 | 68.1  | 115   |         |
| Yes | Team 1 | 6.3  | 68.45 | 120   | 6.9  | 70.75 | 119.5 | 270.749 |
| Yes | Team 1 | 5.25 | 64.65 | 105   | 6.65 | 65.25 | 126.5 |         |
| No  | Team 1 | 11.5 | 101.7 | 113.5 | 14   | 103.3 | 135.5 | 811.391 |
| Yes | Team 1 | 5.5  | 63.15 | 111   | 6.75 | 67    | 125.5 | 110.155 |
| No  | Team 1 | 7.9  | 77.75 | 116   | 8.9  | 78    | 128   |         |
| No  | Team 1 | 7.9  | 80.5  | 120   | 8.8  | 81    | 127   |         |
| No  | Team 1 | 8.6  | 85.2  | 108   | 11.2 | 85.8  | 137   |         |
| Yes | Team 1 | 4.7  | 63.7  | 104   | 7    | 69.25 | 133   |         |
| Yes | Team 1 | 5.1  | 62    | 104   | 5.75 | 66.6  | 105.5 |         |
| Yes | Team 1 | 6    | 67.4  | 112   | 7.1  | 71    | 127   |         |
| No  | Team 1 | 6.5  | 69    | 114   | 7.35 | 70.6  | 127   |         |
| Yes | Team 1 | 4.2  | 57    | 100   | 6.1  | 62.9  | 125.5 |         |
| No  | Team 1 | 7.1  | 72.5  | 114   | 8.5  | 78    | 125   |         |
| No  | Team 1 | 9.1  | 84.2  | 111.5 | 9.1  | 84.05 | 124   |         |
| Yes | Team 1 | 5.4  | 65    | 110   | 6.25 | 68.95 | 119.5 |         |
| No  | Team 1 | 4.8  | 60.65 | 107.5 | 4.7  | 61.15 | 106   |         |
| No  | Team 1 | 5.5  | 61.6  | 111.5 | 6.05 | 62.5  | 121   |         |
| Yes | Team 1 | 5.35 | 65.25 | 106.5 | 6.8  | 66.65 | 130.5 |         |
| Yes | Team 1 | 5.2  | 64.9  | 106.5 | 7.25 | 69.3  | 128.5 |         |
| Yes | Team 1 | 5.85 | 66.85 | 111.5 | 7.2  | 68.25 | 130.5 |         |
| Yes | Team 1 | 7.5  | 75.7  | 111.5 | 8.5  | 77.3  | 125.5 | 92.885  |
| Yes | Team 1 | 5.7  | 65.65 | 113.5 | 6.95 | 69.5  | 117.5 |         |
| No  | Team 1 | 6.4  | 69.25 | 117.5 | 6.45 | 69.45 | 116.5 |         |



|     |        |      |       |       |       |       |       |         |
|-----|--------|------|-------|-------|-------|-------|-------|---------|
| Yes | Team 1 | 5.2  | 62.85 | 113.5 | 5.95  | 64.8  | 129.5 |         |
| Yes | Team 1 | 5.7  | 63.15 | 114   | 6.2   | 64.05 | 125.5 | 197.835 |
| Yes | Team 1 | 5.95 | 67.15 | 110.5 | 7.75  | 72.15 | 128.5 | 198.928 |
| Yes | Team 1 | 8.1  | 79.5  | 116.5 | 9.5   | 83.5  | 131.5 | 227.862 |
| Yes | Team 1 | 5.2  | 65.35 | 108.5 | 6.5   | 67    | 126.5 |         |
| No  | Team 1 | 7.6  | 77.45 | 115.5 | 9.5   | 79.05 | 134.5 |         |
| Yes | Team 1 | 6.35 | 71.5  | 111   | 6.75  | 73.65 | 112.5 |         |
| Yes | Team 1 | 7.3  | 74.35 | 120.5 | 8.65  | 76    | 134.5 |         |
| Yes | Team 1 | 6.45 | 69.25 | 114   | 7.7   | 72.55 | 132.5 | 118.509 |
| Yes | Team 1 | 6.1  | 67.3  | 112.5 | 7     | 70.95 | 118.5 | 208.773 |
| Yes | Team 1 | 4.9  | 65.45 | 97.5  | 7.25  | 68.6  | 134.5 | 110.36  |
| Yes | Team 1 | 4.8  | 60.9  | 110.5 | 6.1   | 66.5  | 120   | 258.617 |
| Yes | Team 1 | 6.15 | 65.25 | 114.5 | 7.7   | 69    | 130   | 79.1575 |
| No  | Team 1 | 5.35 | 62.85 | 113.5 |       |       |       |         |
| Yes | Team 1 | 5.7  | 68.45 | 109.5 | 7.45  | 70.8  | 131   | 394.887 |
| Yes | Team 1 | 4.8  | 62.95 | 97.5  | 5.35  | 65.75 | 102   | 144.313 |
| Yes | Team 1 | 5.15 | 61.6  | 112   | 6.35  | 66.55 | 125.5 | 147.567 |
| No  | Team 1 | 5.4  | 65.65 | 108.5 | 5.4   | 65.9  | 110   |         |
| Yes | Team 1 | 5.65 | 67.45 | 116   | 6.6   | 70    | 120   | 331.466 |
| No  | Team 1 | 6.8  | 72    | 118   | 7.05  | 73    | 121.5 |         |
| Yes | Team 1 | 5.4  | 64.95 | 110.5 | 5.75  | 68.5  | 111   | 249.6   |
| Yes | Team 1 | 6.15 | 67.15 | 111   | 7     | 69.85 | 125   | 124.896 |
| Yes | Team 1 | 5.2  | 62.9  | 111.5 | 6.05  | 66.75 | 116.5 | 118.561 |
| Yes | Team 1 | 5.45 | 60.75 | 109.5 | 6.7   | 66.35 | 125   | 136.951 |
| Yes | Team 1 | 5.3  | 61.65 | 111   | 6.75  | 65.95 | 127   | 323.045 |
| No  | Team 1 | 5.25 | 60.5  | 113   | 6.15  | 65    | 120   |         |
| No  | Team 1 | 10.3 | 91.3  | 123.5 | 10.9  | 94    | 133.5 | 338.385 |
| No  | Team 1 | 9.1  | 84.6  | 112.5 | 10.2  | 85.15 | 129   |         |
| No  | Team 1 | 6.15 | 70.95 | 110   | 7.7   | 72.5  | 132.5 |         |
| Yes | Team 1 | 5.85 | 65.75 | 112.5 | 7.2   | 67.7  | 128   |         |
| Yes | Team 1 | 6.2  | 64.75 | 114   | 7     | 65.5  | 130.5 |         |
| No  | Team 1 | 9.8  | 87    | 114.5 | 10.55 | 88    | 129.5 | 399.776 |
| Yes | Team 1 | 6.65 | 70.45 | 120   | 7.6   | 72.25 | 131.5 | 93.897  |
| Yes | Team 1 | 6.1  | 64.5  | 113.5 | 7.4   | 65.35 | 132.5 | 266.7   |
| Yes | Team 1 | 5.6  | 64.5  | 112   | 6.65  | 65.5  | 127.5 |         |
| Yes | Team 1 | 5.25 | 63.45 | 112   | 6.4   | 64.5  | 125.5 | 148.734 |
| Yes | Team 2 | 7.4  | 73.9  | 113.5 | 7.2   | 74.25 | 117   |         |
| Yes | Team 2 | 4.5  | 59.1  | 100   | 5.75  | 63.5  | 115.5 |         |
| Yes | Team 2 | 5.65 | 67.85 | 111.5 | 6.15  | 70.55 | 115.5 |         |
| Yes | Team 2 | 8.2  | 80.25 | 122.5 | 9.9   | 84.95 | 132.5 |         |
| Yes | Team 2 | 6.8  | 75.3  | 110.5 | 8.25  | 76.75 | 129.5 | 102.518 |
| Yes | Team 2 | 6.6  | 72.25 | 122.5 | 7.65  | 74.45 | 131.5 |         |
| Yes | Team 2 | 5.95 | 69.15 | 105.5 | 7.3   | 73.65 | 125.5 |         |
| No  | Team 2 | 7.75 | 76.65 | 120.5 | 8.9   | 78.55 | 133.5 |         |
| Yes | Team 2 | 7.45 | 74.95 | 113.5 | 8.65  | 78.65 | 125.5 | 280.217 |
| Yes | Team 2 | 6.9  | 72.25 | 119   | 6.5   | 72.4  | 117   |         |
| Yes | Team 2 | 6.3  | 65.45 | 115.5 | 5.75  | 65.5  | 112.5 |         |
| No  | Team 2 | 5.15 | 63.45 | 112.5 | 6.05  | 68.35 | 118.5 |         |
| Yes | Team 2 | 7.4  | 75.65 | 129.5 | 7.55  | 76.95 | 129.5 |         |
| Yes | Team 2 | 6.2  | 68    | 109.5 | 7.95  | 70.45 | 128.5 |         |
| No  | Team 2 | 7.9  | 78.6  | 119.5 | 8.5   | 79.95 | 127   |         |

|     |        |      |        |       |      |        |       |         |
|-----|--------|------|--------|-------|------|--------|-------|---------|
| Yes | Team 2 | 5.6  | 62.45  | 114.5 | 6.25 | 64.8   | 126.5 |         |
| No  | Team 2 | 6.8  | 73.5   | 112.5 | 6.85 | 75.45  | 114.5 |         |
| Yes | Team 2 | 7    | 73.5   | 125.5 | 7.4  | 75.95  | 124   |         |
| Yes | Team 2 | 6.45 | 69.7   | 119.5 | 7.65 | 73.9   | 128.5 |         |
| Yes | Team 2 | 5.7  | 66     | 114.5 | 6.5  | 69.35  | 125   | 386.307 |
| Yes | Team 2 | 6.7  | 72.5   | 118.5 | 7.5  | 74.8   | 128   |         |
| Yes | Team 2 | 5.9  | 67.2   | 115.5 | 6.8  | 67.65  | 125.5 |         |
| Yes | Team 2 | 7.7  | 76.65  | 123.5 | 8.9  | 77.6   | 143.5 |         |
| No  | Team 2 | 6.35 | 72.35  | 104.5 | 7.55 | 73.25  | 125   | 109.662 |
| Yes | Team 2 | 4.75 | 61.25  | 107.5 | 5.8  | 62.65  | 126.5 | 211.957 |
| No  | Team 2 | 4.7  | 61.95  | 108.5 | 6.05 | 63.35  | 129.5 | 358.882 |
| No  | Team 2 | 6.2  | 68.7   | 116.5 | 7.3  | 72.25  | 129   |         |
| Yes | Team 2 | 4.15 | 60.65  | 88.5  | 4.05 | 61     | 85.5  |         |
| Yes | Team 2 | 5.85 | 65.65  | 110.5 | 7.1  | 69.25  | 126   | 117.541 |
| No  | Team 2 | 7.05 | 76.25  | 112.5 | 7.55 | 78.2   | 118.5 |         |
| Yes | Team 2 | 5.95 | 67.85  | 118   | 7.2  | 70.45  | 126.5 |         |
| No  | Team 2 | 7.75 | 77.55  | 125.5 | 9    | 80.95  | 134.5 |         |
| No  | Team 2 | 8.5  | 80.8   | 114.5 | 9.8  | 82.35  | 129.5 | 103.83  |
| Yes | Team 2 | 6    | 66.95  | 109.5 | 7.65 | 71     | 126.5 | 173.258 |
| Yes | Team 2 | 6.15 | 69.6   | 117.5 | 7.7  | 74.7   | 129   | 165.134 |
| No  | Team 2 | 8.6  | 83.1   | 120.5 | 9.3  | 84.45  | 130.5 |         |
| No  | Team 2 | 9.6  | 88.6   | 125.5 | 10.7 | 89.9   | 139.5 |         |
| Yes | Team 2 | 5.15 | 63.5   | 112.5 | 5.3  | 64.35  | 110   | 302.124 |
| No  | Team 2 | 8.7  | 83.15  | 111.5 | 10   | 83.85  | 130.5 | 192.591 |
| Yes | Team 2 | 6.55 | 69.3   | 125.5 | 6.75 | 72.3   | 124.5 |         |
| Yes | Team 2 | 5.9  | 67.75  | 111.5 | 7.2  | 71.95  | 127.5 |         |
| No  | Team 2 | 11   | 98.2   | 132   | 12.8 | 101.85 | 144.5 |         |
| Yes | Team 2 | 6.25 | 68.65  | 115.5 | 7.6  | 69.45  | 134.5 | 53.439  |
| No  | Team 2 | 6.6  | 77.2   | 109.5 | 9.1  | 79.45  | 134   | 361.488 |
| Yes | Team 2 | 5.45 | 62     | 112   | 5.7  | 64.2   | 114.5 | 305.338 |
| No  | Team 2 | 12   | 100.95 | 128.5 | 11.8 | 102    | 129.5 | 614.257 |
| Yes | Team 2 | 6.3  | 71.3   | 114.5 | 7.3  | 74.75  | 126.5 | 225.899 |
| Yes | Team 2 | 6.1  | 68.1   | 114.5 | 6.85 | 70.25  | 129   |         |
| Yes | Team 2 | 5.6  | 65.2   | 114.5 |      |        |       |         |
| No  | Team 2 | 6.9  | 75.35  | 121.5 | 7.9  | 78.95  | 129.5 |         |
| Yes | Team 2 | 8.2  | 79.15  | 109.5 | 8.6  | 79.85  | 120.5 |         |
| Yes | Team 2 | 6.55 | 67.25  | 113.5 | 7.85 | 69.95  | 133.5 | 107.14  |
| Yes | Team 2 | 5.1  | 65.4   | 120   | 6.65 | 66.95  | 126.5 | 151.042 |
| No  | Team 2 | 8.2  | 83.45  | 117   | 8.3  | 84.65  | 123.5 |         |
| Yes | Team 2 | 6.5  | 69.15  | 125.5 | 6.15 | 70.65  | 117.5 | 341.813 |
| No  | Team 2 | 6.05 | 69.35  | 113.5 | 6.15 | 69.95  | 115.5 |         |
| Yes | Team 2 | 5.75 | 66.95  | 115.5 | 6.2  | 70.5   | 118.5 | 295.787 |
| No  | Team 2 | 8.15 | 82.85  | 120.5 | 9.1  | 84.15  | 130.5 |         |
| No  | Team 2 | 5.2  | 61.85  | 112.5 | 6.2  | 63.35  | 125   |         |
| No  | Team 2 | 8.75 | 84.15  | 129.5 | 8.6  | 84.65  | 129.5 |         |
| No  | Team 2 | 5.5  | 66.45  | 114.5 | 6.35 | 69.5   | 124.5 |         |
| Yes | Team 2 | 6.5  | 69.95  | 128.5 | 7.8  | 72.15  | 139.5 | 155.365 |
| Yes | Team 2 | 4.7  | 63.45  | 107.5 | 6.85 | 67     | 132.5 | 105     |
| Yes | Team 2 | 5.35 | 62.45  | 112.5 | 6.3  | 63.35  | 128.5 | 134.388 |
| Yes | Team 2 | 6.45 | 69.45  | 108.5 | 7.15 | 73.45  | 116.5 | 112.45  |
| Yes | Team 2 | 5.2  | 61.25  | 114.5 | 5.9  | 63.65  | 118.5 | 133.08  |

|     |        |      |       |       |      |       |       |         |
|-----|--------|------|-------|-------|------|-------|-------|---------|
| Yes | Team 2 | 5.5  | 65.65 | 115.5 | 6.75 | 66.65 | 133.5 | 132.148 |
| No  | Team 2 | 7.05 | 72.95 | 133.5 | 7.55 | 73.5  | 136.5 |         |
| No  | Team 2 | 6.25 | 71.45 | 119.5 | 6.3  | 72.05 | 119   |         |
| Yes | Team 2 | 4.75 | 61.95 | 113   | 4.8  | 62.2  | 116.5 |         |
| Yes | Team 2 | 7.5  | 80.15 | 116.5 | 9.1  | 83.45 | 127.5 |         |
| No  | Team 2 | 6.15 | 74.05 | 92.5  | 7.9  | 75.7  | 118.5 |         |
| Yes | Team 2 | 5.8  | 66.65 | 113   | 7.15 | 68.45 | 132   |         |
| No  | Team 2 | 8.7  | 83.9  | 124   | 8.9  | 85.65 | 127.5 |         |
| Yes | Team 2 | 5.9  | 66.45 | 113   | 5.6  | 66.5  | 113   |         |
| Yes | Team 2 | 6.25 | 68.3  | 114   | 5.7  | 68.3  | 107.5 |         |
| Yes | Team 2 | 6.8  | 73.5  | 111.5 | 8.05 | 75.8  | 132.5 |         |
| No  | Team 2 | 6    | 67.45 | 113.5 | 6.7  | 70.65 | 119.5 |         |
| Yes | Team 2 | 4.85 | 62.35 | 108.5 | 5.3  | 65.95 | 112.5 |         |
| Yes | Team 2 | 4.65 | 62.9  | 100.5 | 5.55 | 67.45 | 109.5 |         |
| Yes | Team 2 | 6.55 | 70.45 | 114.5 | 7.2  | 70.75 | 131.5 |         |
| No  | Team 2 | 5.95 | 64.9  | 113.5 | 6.7  | 67.05 | 122.5 |         |
| Yes | Team 2 | 6    | 71.45 | 123.5 | 7.5  | 74    | 130.5 |         |
| Yes | Team 2 | 7.1  | 73.35 | 114.5 | 7.1  | 74.4  | 115.5 |         |
| Yes | Team 2 | 6.95 | 71.9  | 118   | 8.1  | 74.45 | 130.5 | 165.417 |
| Yes | Team 2 | 5.95 | 66.25 | 119.5 | 6.25 | 69.05 | 120.5 |         |
| Yes | Team 2 | 6.3  | 70.15 | 118.5 | 6.55 | 71.75 | 123.5 |         |
| No  | Team 2 | 7.3  | 74.75 | 124   | 7.8  | 74.95 | 125   |         |
| Yes | Team 2 | 5.05 | 59.8  | 112.5 | 5.35 | 62.2  | 116.5 |         |
| Yes | Team 2 | 5.75 | 64    | 113.5 | 7.1  | 69.45 | 126.5 | 259.513 |
| Yes | Team 2 | 6.5  | 71.8  | 124.5 | 7.75 | 74.75 | 125.5 |         |
| Yes | Team 2 | 4.55 | 56.65 | 109   | 5.45 | 61.35 | 114.5 |         |
| No  | Team 2 | 6.85 | 72.95 | 117.5 | 9    | 74.95 | 142.5 | 275.596 |
| Yes | Team 2 | 5.35 | 63.25 | 113.5 | 5.9  | 67.35 | 119.5 |         |
| Yes | Team 2 | 6.45 | 68.45 | 113.5 | 7.4  | 72.95 | 125   |         |
| No  | Team 2 | 7.35 | 74    | 114   | 8.45 | 75.7  | 125.5 | 141.334 |
| Yes | Team 2 | 5.15 | 61.9  | 113.5 | 6.7  | 67.45 | 125.5 |         |
| No  | Team 2 | 6.55 | 69.45 | 122.5 | 7.8  | 70    | 139   |         |
| Yes | Team 2 | 5.55 | 65.45 | 116.5 | 6    | 69.45 | 115.5 |         |
| Yes | Team 2 | 5.7  | 65.1  | 115.5 | 6.65 | 66.65 | 128   | 209.754 |
| Yes | Team 2 | 3.8  | 55.45 | 95.5  | 4.3  | 58    | 107   |         |
| Yes | Team 2 | 6    | 68.25 | 114.5 | 7.6  | 71.65 | 130   | 154.52  |
| Yes | Team 2 | 5    | 62    | 110.5 | 5.55 | 64.45 | 113.5 |         |
| Yes | Team 2 | 6.25 | 67.7  | 127   | 7.3  | 72.95 | 137.5 | 248.373 |
| Yes | Team 2 | 6.2  | 68.95 | 114.5 | 7.7  | 70.6  | 133.5 |         |
| Yes | Team 2 | 5.25 | 65    | 103.5 | 6.25 | 68.95 | 114.5 | 124.896 |
| Yes | Team 2 | 5.05 | 60.3  | 112.5 | 5.55 | 62.65 | 124.5 |         |
| No  | Team 2 | 6.9  | 73.75 | 113.5 | 8.6  | 74.95 | 137   | 133.076 |
| Yes | Team 2 | 5.1  | 63.75 | 115   | 6.2  | 68    | 119   |         |
| Yes | Team 2 | 7.65 | 76.85 | 126.5 | 9.05 | 80.25 | 133   | 189.646 |
| Yes | Team 2 | 8.9  | 84.15 | 114.5 | 10.3 | 84.75 | 130.5 |         |
| Yes | Team 2 | 3.85 | 56.95 | 115.5 | 5.4  | 60.65 | 128.5 | 143.759 |
| Yes | Team 2 | 7.05 | 73.45 | 119.5 | 7.9  | 76.45 | 126.5 |         |
| No  | Team 2 | 10.6 | 99.35 | 114.5 | 10.9 | 99.8  | 120.5 | 207.59  |
| No  | Team 2 | 5.15 | 64.2  | 110.5 | 6.2  | 68    | 123   |         |
| Yes | Team 2 | 6.7  | 73.75 | 114   | 7.3  | 76.55 | 120   |         |
| No  | Team 2 | 7.55 | 77.95 | 109   | 9.4  | 79.95 | 126.5 | 453.981 |

|     |        |      |       |       |      |       |       |         |
|-----|--------|------|-------|-------|------|-------|-------|---------|
| Yes | Team 2 | 6.35 | 69.8  | 112.5 | 8.1  | 74.15 | 134   |         |
| Yes | Team 2 | 4.8  | 61.5  | 107.5 | 5.1  | 61.8  | 116.5 | 70.763  |
| No  | Team 2 | 7.35 | 75.65 | 113.5 | 8.3  | 77.45 | 121   |         |
| Yes | Team 2 | 5    | 65.1  | 104.5 | 6.7  | 67.05 | 126   |         |
| No  | Team 2 | 5.7  | 65.7  | 108.5 | 6.6  | 67.15 | 120.5 |         |
| No  | Team 2 | 6    | 67.9  | 113.5 | 6.8  | 71.45 | 121.5 |         |
| Yes | Team 2 | 6.2  | 67.35 | 113.5 | 7.65 | 70    | 129.5 |         |
| No  | Team 2 | 6.15 | 67.3  | 111.5 | 6.9  | 71    | 120   |         |
| Yes | Team 2 | 7.3  | 76.85 | 110.5 | 9.55 | 78.65 | 135.5 |         |
| No  | Team 2 | 6.9  | 73.05 | 106   |      | 74.95 | 123.5 |         |
| Yes | Team 2 | 8.1  | 76.5  | 113.5 | 9.3  | 77.75 | 128.5 | 231.912 |
| Yes | Team 2 | 7    | 72.9  | 125   | 8.25 | 73.85 | 131.5 |         |
| Yes | Team 2 | 6.25 | 72.4  | 111.5 | 7.1  | 75.75 | 125.5 |         |
| Yes | Team 2 | 6.2  | 66.8  | 113.5 | 6.7  | 67.15 | 125   |         |
| Yes | Team 2 | 5.3  | 67.5  | 114.5 | 6.1  | 69.05 | 115.5 |         |
| Yes | Team 2 | 6.6  | 70.1  | 121   | 7.75 | 72.95 | 128.5 |         |
| No  | Team 2 | 6.55 | 69.95 | 113.5 | 6.8  | 71.35 | 119.5 |         |
| No  | Team 2 | 5.15 | 63.95 | 109.5 | 6.2  | 66.15 | 122.5 |         |
| No  | Team 2 | 5.9  | 66.25 | 109.5 |      |       |       |         |
| Yes | Team 2 | 5.35 | 65.15 | 105.5 |      |       |       |         |
| No  | Team 2 | 5.5  | 65    | 113.5 | 6.2  | 69.15 | 120.5 |         |
| Yes | Team 2 | 5.7  | 68.95 | 106.5 | 7.2  | 71.45 | 126.5 |         |
| Yes | Team 2 | 7    | 68.45 | 113.5 | 8.05 | 71.35 | 128.5 |         |
| Yes | Team 2 | 5.5  | 63.3  | 114.5 | 6.5  | 66.25 | 129.5 |         |
| Yes | Team 2 | 5.5  | 67    | 116   | 6.5  | 71.75 | 125.5 |         |
| Yes | Team 2 | 6    | 67.45 | 114.5 | 6.95 | 70.25 | 125.5 |         |
| Yes | Team 2 | 7    | 72.7  | 113   | 8.1  | 73.85 | 127.5 | 168.238 |
| Yes | Team 2 | 6.2  | 65.5  | 113.5 | 7.2  | 67.9  | 127.5 |         |
| Yes | Team 2 | 6    | 65.25 | 114.5 | 7.05 | 68.2  | 128.5 | 242.824 |
| No  | Team 2 | 8.05 | 79.5  | 113.5 | 9    | 80.75 | 125.5 | 195.709 |
| No  | Team 2 | 8.9  | 83.2  | 114.5 | 9.9  | 85.45 | 131.5 |         |
| Yes | Team 2 | 5.35 | 66.1  | 112   | 7.25 | 67.95 | 134.5 |         |
| No  | Team 2 | 10.3 | 94.95 | 124   | 10.9 | 96.45 | 128   |         |
| No  | Team 2 | 7.35 | 77.95 | 100.5 | 9.3  | 77.95 | 131.5 |         |
| Yes | Team 2 | 5.2  | 60.95 | 103.5 | 6.3  | 64.95 | 125.5 | 119.98  |
| Yes | Team 2 | 6.3  | 66.65 | 113.5 | 7.2  | 67    | 130.5 |         |
| No  | Team 2 | 6.35 | 72.2  | 113.5 | 7.55 | 72.85 | 126.5 |         |
| No  | Team 2 | 5.35 | 65.8  | 109.5 | 6.5  | 69.25 | 125.5 |         |
| No  | Team 2 | 8.45 | 83.25 | 115.5 |      | 83.45 | 116.5 |         |
| Yes | Team 2 | 7.2  | 72.45 | 110.5 | 8.85 | 74.45 | 130.5 |         |
| No  | Team 2 | 7.25 | 73.65 | 118.5 | 9.05 | 74.25 | 131.5 |         |
| No  | Team 2 | 8.3  | 80.65 | 120.5 | 9.2  | 81.35 | 133.5 |         |
| No  | Team 2 | 8.05 | 78.65 | 114   | 8.9  | 79.65 | 127.5 |         |
| No  | Team 2 | 9.5  | 92.8  | 118.5 | 10.9 | 93.3  | 129   |         |
| No  | Team 2 | 7.3  | 75.45 | 114.5 | 9    | 79.5  | 130.5 | 147.699 |
| No  | Team 2 | 6.95 | 76.65 | 105.5 | 8.7  | 77.25 | 130.5 |         |
| Yes | Team 2 | 5.4  | 66.4  | 110.5 | 7.35 | 69.45 | 131.5 | 66.986  |
| No  | Team 2 | 7.8  | 80.9  | 119.5 | 8.4  | 82.15 | 127   |         |
| Yes | Team 2 | 4.2  | 58.8  | 109.5 | 5.55 | 66    | 115   |         |
| Yes | Team 2 | 5.1  | 64.95 | 105.5 | 6.8  | 70.95 | 122.5 |         |
| Yes | Team 2 | 5    | 62.45 | 106.5 | 5.2  | 63.5  | 114.5 |         |

|     |        |      |       |       |      |       |       |         |
|-----|--------|------|-------|-------|------|-------|-------|---------|
| No  | Team 2 | 6    | 66.05 | 111.5 | 6.2  | 67.2  | 116.5 |         |
| Yes | Team 2 | 5.45 | 64.25 | 110.5 | 5    | 64.9  | 105.5 |         |
| No  | Team 2 | 6.5  | 69.8  | 110.5 | 6.45 | 69.85 | 115.5 |         |
| Yes | Team 2 | 6.4  | 71.45 | 113   | 8.4  | 75.85 | 132.5 | 211.576 |
| Yes | Team 2 | 5.8  | 66.95 | 116.5 | 7.25 | 68.25 | 129   | 164.459 |
| Yes | Team 2 | 5.35 | 62.45 | 111.5 | 7.2  | 65.7  | 132.5 | 226.451 |
| No  | Team 2 | 8.3  | 83.45 | 117.5 | 9.3  | 87.25 | 125.5 | 690.517 |
| No  | Team 2 | 5.4  | 62.5  | 100.5 | 7.4  | 65.85 | 132.5 | 327.48  |
| Yes | Team 2 | 6.7  | 72.95 | 119.5 | 8.45 | 75.25 | 138.5 |         |
| Yes | Team 2 | 5.35 | 63.45 | 114.5 | 6.45 | 67.65 | 121.5 | 168.887 |
| Yes | Team 2 | 5.75 | 67    | 107.5 | 7.4  | 68.75 | 127.5 | 32.324  |
| Yes | Team 2 | 4.6  | 61    | 109.5 | 5.15 | 63.6  | 113.5 |         |
| Yes | Team 2 | 6.2  | 68.25 | 115.5 | 7.7  | 71.35 | 126.5 |         |
| Yes | Team 2 | 5.25 | 64.25 | 107.5 | 7    | 67.95 | 131.5 | 135.008 |
| Yes | Team 2 | 5.95 | 70.95 | 114.5 | 7.5  | 72.25 | 125.5 |         |
| Yes | Team 2 | 6.05 | 65.95 | 112.5 | 7.6  | 66.85 | 130.5 |         |
| No  | Team 2 | 7.6  | 77.4  | 110.5 | 7.15 | 78.1  | 110   |         |
| Yes | Team 2 | 7.15 | 71.9  | 113.5 | 8.4  | 73.15 | 132.5 | 55.149  |
| Yes | Team 2 | 6.35 | 69.65 | 111.5 | 6.3  | 70.35 | 117.5 | 328.094 |
| Yes | Team 2 | 6.55 | 72.95 | 122.5 | 7.8  | 73.5  | 129.5 | 401.457 |
| Yes | Team 2 | 5.35 | 67.95 | 105   | 8.1  | 69.85 | 136.5 | 94.888  |
| Yes | Team 2 | 6.8  | 72.65 | 110.5 | 8.4  | 73.95 | 129.5 | 61.1375 |
| Yes | Team 2 | 5.85 | 62.75 | 114.5 | 7.2  | 65.45 | 131.5 | 60.479  |
| Yes | Team 2 | 6.4  | 69.95 | 109.5 | 7.6  | 71.45 | 128.5 | 115.398 |
| No  | Team 2 | 6.45 | 68.45 | 110.5 | 7.75 | 70.45 | 131.5 |         |
| Yes | Team 2 | 5.65 | 67.85 | 105.5 | 7.65 | 70.2  | 133.5 |         |
| No  | Team 2 | 6.9  | 75.1  | 120.5 | 8    | 78.7  | 125.5 | 99.114  |
| No  | Team 2 | 7    | 75.65 | 110.5 | 8.2  | 76.65 | 127.5 | 262.104 |
| Yes | Team 2 | 5.65 | 63.45 | 113.5 | 6.6  | 66.4  | 126.5 | 155.709 |
| Yes | Team 2 | 5.05 | 63.15 | 107.5 | 7.25 | 68.95 | 128   | 55.708  |
| Yes | Team 2 | 6.6  | 72.45 | 118.5 | 7.5  | 73.45 | 130.5 |         |
| Yes | Team 2 | 5.8  | 63.95 | 114.5 | 6.3  | 64.85 | 129   |         |
| Yes | Team 2 | 4.45 | 57.25 | 105.5 | 4.7  | 58.95 | 107   |         |
| Yes | Team 2 | 5.45 | 63.3  | 105.5 | 6.9  | 68.45 | 126   | 206.383 |
| Yes | Team 2 | 5.45 | 65.25 | 111.5 | 5.45 | 67.55 | 105.5 | 249.924 |
| Yes | Team 2 | 6    | 65.25 | 112.5 | 7.1  | 68.35 | 125.5 | 361.331 |
| No  | Team 2 | 5.5  | 71.1  | 109.5 | 8.1  | 75.95 | 131.5 | 301.904 |
| Yes | Team 2 | 5.05 | 61.9  | 110.5 | 6.7  | 63.95 | 130.5 |         |
| Yes | Team 2 | 5.15 | 62.45 | 118   | 6.15 | 67.4  | 124   | 319.249 |
| Yes | Team 2 | 6.7  | 73.2  | 114.5 | 7.2  | 75.25 | 115   | 285.928 |
| Yes | Team 2 | 5.4  | 62.45 | 110.5 | 5.45 | 65.1  | 112   | 131.387 |
| Yes | Team 2 | 4.25 | 59.35 | 101.5 | 6.65 | 64.9  | 131.5 | 321.799 |
| Yes | Team 2 | 5.8  | 65.5  | 112.5 | 6.9  | 67.75 | 132   | 148.789 |
| Yes | Team 2 | 4.55 | 57.95 | 106.5 | 6    | 61.35 | 133.5 |         |
| Yes | Team 2 | 5.15 | 67.35 | 98.5  | 7    | 68.9  | 129.5 | 309.338 |
| Yes | Team 2 | 5.2  | 64.25 | 112.5 | 6.4  | 67.25 | 127   | 207.703 |
| Yes | Team 2 | 4.4  | 59.45 | 95.5  | 6.6  | 63.85 | 130.5 | 60.26   |
| Yes | Team 2 | 6.4  | 69    | 117.5 | 7.65 | 71.95 | 125.5 | 309.452 |
| Yes | Team 2 | 3.45 | 56.45 | 75.5  | 3.8  | 58.35 | 91.5  |         |
| Yes | Team 2 | 6.1  | 68.65 | 114.5 | 7.6  | 72.35 | 125.5 | 208.232 |
| Yes | Team 2 | 6.5  | 72.25 | 107.5 | 8.45 | 74.15 | 129.5 | 342.755 |

|     |        |      |       |       |      |       |       |         |
|-----|--------|------|-------|-------|------|-------|-------|---------|
| Yes | Team 2 | 5.85 | 66.3  | 110   | 6    | 67.45 | 114.5 |         |
| Yes | Team 2 | 6.55 | 70.85 | 112.5 | 7.7  | 70.95 | 129.5 | 139.331 |
| Yes | Team 2 | 4.8  | 60.45 | 100.5 | 7.4  | 66.25 | 135   | 188.592 |
| Yes | Team 2 | 6.95 | 69.4  | 113.5 | 7.85 | 70.7  | 127   | 228.412 |
| Yes | Team 2 | 6.1  | 67.35 | 114.5 | 7.3  | 68.45 | 130.5 | 524.426 |
| No  | Team 2 | 7.55 | 76.9  | 109.5 | 9.2  | 77.35 | 131.5 | 442.209 |
| Yes | Team 2 | 4.95 | 60    | 112.5 | 6.05 | 61.25 | 128.5 | 159.734 |
| Yes | Team 2 | 5.8  | 66    | 114.5 | 7.1  | 69.25 | 129.5 | 248.938 |
| Yes | Team 2 | 5.8  | 66.35 | 113.5 | 7.1  | 70    | 127   | 167.46  |
| Yes | Team 2 | 5.55 | 63.25 | 114.5 | 6.65 | 65.65 | 126   | 87.035  |
| Yes | Team 2 | 4.45 | 60.2  | 112.5 | 6.2  | 63.65 | 125.5 | 182.635 |
| Yes | Team 2 | 5.5  | 63.95 | 112.5 | 6    | 69.8  | 112.5 | 130.752 |
| No  | Team 2 | 8.2  | 79.6  | 109.5 | 8.35 | 80    | 116.5 | 202.179 |
| Yes | Team 2 | 7.2  | 73.25 | 113.5 | 8.8  | 75.6  | 143.5 | 440.499 |
| Yes | Team 2 | 5.05 | 62.1  | 103.5 | 6.3  | 67.7  | 121.5 | 374.338 |
| Yes | Team 2 | 5.05 | 61.4  | 99.5  | 5.45 | 63.65 | 103   | 215.172 |
| Yes | Team 2 | 6.8  | 71.35 | 115.5 | 8    | 72.4  | 130   | 160.853 |
| Yes | Team 2 | 5.5  | 64.95 | 113.5 | 7.05 | 70.45 | 126   | 79.466  |
| Yes | Team 2 | 6.9  | 73.45 | 102.5 | 8.65 | 74.95 | 126   | 287.594 |
| No  | Team 2 | 7.75 | 76.95 | 113.5 | 9.5  | 78.45 | 132.5 | 229.884 |
| Yes | Team 2 | 6.05 | 66.05 | 114.5 | 6.7  | 66.35 | 128.5 | 243.85  |
| Yes | Team 2 | 6.55 | 68.1  | 114.5 | 7.15 | 69.45 | 129.5 | 241.137 |
| No  | Team 2 | 5.95 | 65.8  | 114.5 | 6.7  | 68.25 | 119.5 |         |
| Yes | Team 2 | 5.85 | 63.9  | 114.5 | 6.6  | 68.5  | 125   | 168.907 |
| No  | Team 2 | 6.5  | 69.4  | 116   | 7.3  | 73.65 | 117.5 |         |
| Yes | Team 2 | 5.65 | 64.65 | 114   | 6.7  | 67    | 126.5 | 188.307 |
| No  | Team 2 | 7.85 | 79.95 | 119.5 | 8.2  | 80.55 | 126.5 |         |
| No  | Team 2 | 4.4  | 58.25 | 106   | 4.6  | 58.45 | 107.5 |         |
| Yes | Team 2 | 6.2  | 67.7  | 109.5 | 7.6  | 69.35 | 129.5 | 264.347 |
| No  | Team 2 | 6    | 65.75 | 107.5 | 6.1  | 67.15 | 111.5 |         |
| No  | Team 2 | 5.6  | 64.95 | 106.5 | 6    | 66.85 | 117.5 | 112.692 |
| Yes | Team 2 | 4.75 | 62.45 | 102.5 | 5.95 | 66.95 | 117.5 | 130.673 |
| Yes | Team 2 | 6.2  | 68.75 | 116.5 | 7.7  | 69.75 | 137.5 | 138.44  |
| Yes | Team 2 | 4.4  | 59.15 | 110.5 | 5.95 | 63.95 | 126.5 | 162.895 |
| Yes | Team 2 | 5.45 | 65.15 | 113.5 | 6.85 | 68.25 | 126   |         |
| Yes | Team 2 | 5.1  | 64.15 | 111.5 | 6.45 | 66.95 | 127.5 | 265.858 |
| Yes | Team 2 | 6.3  | 71.35 | 106.5 | 7.6  | 72.5  | 125.5 | 92.327  |
| Yes | Team 2 | 5.1  | 61.65 | 111.5 | 6.25 | 62.95 | 127.5 | 303.199 |
| Yes | Team 2 | 6.3  | 71.15 | 111.5 | 6    | 72.45 | 114.5 |         |
| Yes | Team 2 | 6.15 | 67.25 | 120   | 7.05 | 68.85 | 126.5 | 217.632 |
| Yes | Team 2 | 7.15 | 73.45 | 120.5 | 8.25 | 75.25 | 131.5 | 167.023 |
| No  | Team 2 | 5.25 | 62.65 | 120.5 | 5.8  | 63.75 | 125.5 |         |
| Yes | Team 2 | 5.55 | 65.15 | 113.5 | 6.95 | 67.75 | 126.5 | 246.163 |
| Yes | Team 2 | 5.15 | 62.95 | 114.5 | 5.6  | 65.2  | 114.5 |         |
| Yes | Team 2 | 5.85 | 67.25 | 116.5 | 6.85 | 68.45 | 132.5 | 221.727 |
| Yes | Team 2 | 5.85 | 69.25 | 106.5 | 7.1  | 70.25 | 127.5 | 34.105  |
| Yes | Team 2 | 5.45 | 67.65 | 106.5 | 6.7  | 69.95 | 126.5 | 481.828 |
| Yes | Team 2 | 5.5  | 64.25 | 114.5 | 6.6  | 65.45 | 127.5 | 40.643  |
| No  | Team 2 | 8.4  | 82.2  | 126.5 | 9    | 82.85 | 134.5 | 188.592 |
| Yes | Team 2 | 4.5  | 59    | 103.5 | 5.3  | 62.15 | 109.5 |         |
| Yes | Team 2 | 4.9  | 60.35 | 106.5 | 6    | 65.1  | 116   |         |

|     |        |      |       |       |      |       |       |         |
|-----|--------|------|-------|-------|------|-------|-------|---------|
| Yes | Team 2 | 6.3  | 70.85 | 113.5 | 7.3  | 72.45 | 128.5 | 81.725  |
| Yes | Team 2 | 6.75 | 72    | 106.5 | 8.15 | 73.5  | 127.5 |         |
| Yes | Team 2 | 5.45 | 63.85 | 109   | 6.65 | 67.65 | 116   |         |
| Yes | Team 2 | 6.35 | 72.55 | 114.5 |      |       |       |         |
| Yes | Team 2 | 6.6  | 70.35 | 115.5 | 7.85 | 72.85 | 130   |         |
| No  | Team 2 | 9.8  | 89.1  | 117   |      |       |       |         |
| Yes | Team 2 | 6.45 | 71.05 | 122   | 7.4  | 74.95 | 130.5 |         |
| Yes | Team 2 | 6.05 | 66.15 | 113.5 | 5.8  | 67.55 | 116   |         |
| No  | Team 2 | 6.2  | 75.2  | 99    | 9.3  | 77.45 | 128   |         |
| Yes | Team 2 | 5.7  | 67.2  | 109.5 | 6    | 70.25 | 109.5 |         |
| No  | Team 2 | 6.55 | 70.35 | 110   | 7.4  | 71.35 | 121.5 |         |
| Yes | Team 2 | 5.45 | 65.95 | 112.5 | 7    | 69.95 | 126.5 |         |
| Yes | Team 2 | 5.9  | 65.65 | 113.5 | 7.5  | 68.45 | 129.5 |         |
| Yes | Team 2 | 5.05 | 63.95 | 99.5  | 6.8  | 65.85 | 131.5 |         |
| Yes | Team 2 | 4.65 | 61.6  | 109.5 | 5.3  | 65.75 | 120.5 |         |
| Yes | Team 2 | 6.9  | 71.25 | 110.5 | 8.2  | 74.95 | 128.5 | 40.084  |
| No  | Team 2 | 5.45 | 65.45 | 109.5 | 6.65 | 67.75 | 124.5 |         |
| No  | Team 2 | 6.15 | 70.2  | 115.5 | 6.65 | 73.45 | 114.5 |         |
| Yes | Team 2 | 7.8  | 81.05 | 116.5 | 8.6  | 83.35 | 122.5 |         |
| No  | Team 2 | 9    | 85.15 | 114.5 | 9.7  | 86.7  | 128   | 181.878 |
| Yes | Team 2 | 5.4  | 65.1  | 103.5 | 5.15 | 65.45 | 95.5  |         |
| Yes | Team 2 | 6.5  | 71.45 | 114   | 8.25 | 74.45 | 132.5 | 165.7   |
| Yes | Team 2 | 4.9  | 62.75 | 109.5 | 7.1  | 68.5  | 127.5 |         |
| No  | Team 2 | 9.2  | 85.75 | 116.5 | 9.7  | 87.05 | 122.5 |         |
| Yes | Team 2 | 7.1  | 73.55 | 122.5 | 8.25 | 74.95 | 130.5 | 163.417 |
| Yes | Team 2 | 8.2  | 81    | 114.5 | 9.3  | 82.65 | 133.5 | 487.866 |
| Yes | Team 2 | 6.2  | 73.8  | 106.5 | 5.85 | 73.15 | 98    |         |
| No  | Team 2 | 5.85 | 63.6  | 114.5 | 5.5  | 64.55 | 105.5 |         |
| No  | Team 2 | 7.4  | 78.45 | 112.5 | 8.35 | 78.65 | 124.5 |         |
| Yes | Team 2 | 5.35 | 63.65 | 113.5 | 7.2  | 68.35 | 126.5 | 207.27  |
| Yes | Team 2 | 6.65 | 72.35 | 121.5 | 7.75 | 74.25 | 129.5 | 412.329 |
| Yes | Team 2 | 6.65 | 70.3  | 116.5 | 7.8  | 71.85 | 129.5 | 240.998 |
| Yes | Team 2 | 5.15 | 60.4  | 112.5 | 6    | 62.2  | 130.5 | 266.526 |
| Yes | Team 2 | 5.1  | 61.1  | 112.5 | 6.2  | 66.95 | 119   |         |
| Yes | Team 2 | 7.35 | 76.95 | 118.5 | 8.9  | 79.6  | 140.5 | 74.159  |
| Yes | Team 2 | 6    | 70.75 | 105.5 | 7.9  | 72.65 | 132   |         |
| Yes | Team 2 | 3.75 | 56.45 | 92.5  | 4.85 | 60.85 | 109.5 | 111.986 |
| No  | Team 2 | 7.8  | 83.05 | 114.5 | 10   | 84.85 | 134.5 | 323.061 |
| Yes | Team 2 | 5.8  | 65.8  | 112   | 7    | 68.2  | 129.5 | 80.452  |
| Yes | Team 2 | 5.4  | 65.45 | 114.5 | 6.05 | 68.6  | 117   |         |
| Yes | Team 2 | 5.4  | 64.7  | 113   | 5.85 | 66.3  | 117.5 | 179.695 |
| No  | Team 2 | 8.35 | 80.4  | 113.5 | 9.1  | 82.25 | 126.5 | 397.185 |
| No  | Team 2 | 6.3  | 69.25 | 116.5 | 6.9  | 70    | 123.5 |         |
| No  | Team 2 | 5.55 | 65.45 | 106.5 | 6.15 | 66.8  | 118.5 | 234.606 |
| No  | Team 2 | 6    | 67.5  | 109.5 | 7.7  | 70.3  | 126.5 | 253.78  |
| No  | Team 2 | 8.6  | 82.6  | 123.5 |      |       |       |         |
| No  | Team 2 | 7.1  | 74.55 | 105.5 | 8.3  | 76.25 | 129.5 | 292.091 |
| Yes | Team 2 | 7.45 | 78.25 | 115.5 | 8.6  | 80.2  | 126.5 | 266.16  |
| Yes | Team 2 | 6.2  | 72.15 | 104.5 | 7.15 | 74.2  | 120.5 | 112.395 |
| Yes | Team 2 | 6.6  | 71.15 | 114.5 | 7.4  | 73.95 | 127.5 | 159.446 |
| Yes | Team 2 | 6.6  | 74.55 | 111.5 | 9    | 77.95 | 140.5 | 141.7   |

|     |        |       |        |       |      |        |       |         |
|-----|--------|-------|--------|-------|------|--------|-------|---------|
| Yes | Team 2 | 4.95  | 63.95  | 109.5 | 4.9  | 64.55  | 102.5 |         |
| Yes | Team 2 | 4.65  | 60.65  | 111.5 | 5.15 | 62.45  | 118.5 | 163.183 |
| Yes | Team 2 | 6.55  | 69.75  | 116   | 7.35 | 73.45  | 123.5 |         |
| Yes | Team 2 | 6.2   | 67.9   | 115.5 | 6.3  | 69.25  | 116.5 |         |
| Yes | Team 2 | 4.9   | 62.4   | 105.5 | 5.85 | 65.45  | 119.5 |         |
| No  | Team 2 | 7.1   | 78.65  | 106.5 | 7.7  | 79.95  | 116.5 |         |
| Yes | Team 2 | 5.45  | 60.55  | 111.5 | 6    | 64.95  | 117.5 |         |
| No  | Team 2 | 6.85  | 73.85  | 115.5 | 7.1  | 74.7   | 119.5 |         |
| Yes | Team 2 | 7.9   | 79.5   | 114.5 | 8.9  | 81.55  | 127.5 | 48.263  |
| Yes | Team 2 | 6.5   | 70.25  | 114.5 | 7.45 | 72.25  | 126.5 | 214.7   |
| No  | Team 2 | 5.5   | 64.45  | 115   | 6.05 | 67.15  | 125.5 |         |
| Yes | Team 2 | 5.9   | 68     | 119.5 | 7.2  | 71.95  | 126.5 |         |
| Yes | Team 2 | 5.1   | 61.35  | 102   | 7    | 66.25  | 125.5 |         |
| No  | Team 2 | 13    | 105.25 | 132.5 | 14.3 | 107.75 | 136.5 | 236.239 |
| No  | Team 2 | 7.65  | 76.9   | 124.5 | 8.3  | 80     | 126.5 |         |
| No  | Team 2 | 10.2  | 91.15  | 127.5 | 11.6 | 94.25  | 136   |         |
| No  | Team 2 | 11.95 | 99.35  | 123.5 | 13.4 | 101.5  | 142.5 |         |
| Yes | Team 2 | 6.85  | 73.65  | 116.5 | 8.5  | 76.7   | 130   | 223.13  |
| Yes | Team 2 | 7.05  | 76.45  | 115.5 | 8.7  | 78.95  | 135.5 | 362.931 |
| No  | Team 2 | 10.15 | 90     | 123.5 | 11.6 | 90.75  | 140   | 164.325 |
| No  | Team 2 | 5.95  | 69.3   | 117.5 | 7    | 72.3   | 131   |         |
| Yes | Team 2 | 5.1   | 62.15  | 109.5 | 6.7  | 65.6   | 128.5 | 113.989 |
| Yes | Team 2 | 6.05  | 71.25  | 98.5  | 8.8  | 73.95  | 127.5 | 344.711 |
| Yes | Team 2 | 5.45  | 65.25  | 113.5 | 6.7  | 67.25  | 126.5 | 64.939  |
| Yes | Team 2 | 8.3   | 82.4   | 123.5 | 9.8  | 83.85  | 136   | 217.643 |
| Yes | Team 2 | 6.3   | 69     | 125   | 7.7  | 71.25  | 138.5 | 106.635 |
| Yes | Team 2 | 7.45  | 79.25  | 124.5 | 9.3  | 81.25  | 144.5 | 232.077 |
| Yes | Team 2 | 8.2   | 80.35  | 121.5 | 9.2  | 81.5   | 130   |         |
| Yes | Team 2 | 5.05  | 62.15  | 113.5 | 6.25 | 64.75  | 126.5 | 232.089 |
| No  | Team 2 | 8.1   | 89     | 100.5 | 10.9 | 89.45  | 127.5 | 552.173 |
| No  | Team 2 | 5.4   | 61.45  | 112.5 | 6.25 | 66.45  | 120.5 |         |
| No  | Team 2 | 6.65  | 76.45  | 114.5 | 8.4  | 79.3   | 132.5 | 258.295 |
| No  | Team 2 | 7.4   | 76.25  | 120.5 | 8.9  | 78     | 135.5 | 352.316 |
| No  | Team 2 | 7.45  | 76.25  | 118.5 | 7.45 | 76.9   | 120.5 | 199.471 |
| Yes | Team 2 | 5.6   | 63     | 114.5 | 5.7  | 64.65  | 115.5 |         |
| Yes | Team 2 | 6.8   | 72.25  | 124.5 | 7.85 | 75.3   | 131   | 445.838 |
| Yes | Team 2 | 6.75  | 70.95  | 124.5 | 7.7  | 72.65  | 129.5 | 234.606 |



| MMA_adm  | tHcy_adm | Cob_exit | MMA_exit | tHcy_exit | cB12_adm | cB12_exit | Hb_adm | Hb_exit |
|----------|----------|----------|----------|-----------|----------|-----------|--------|---------|
|          |          |          |          |           |          |           | 90     | 107     |
|          |          |          |          |           |          |           | 118    | 121     |
|          |          |          |          |           |          |           | 115    |         |
| 0.889911 | 11.42564 | 311.722  | 0.325035 | 5.947304  | -1.18904 | 0.07538   | 110    | 121     |
|          |          |          |          |           |          |           | 76     | 109     |
|          |          |          |          |           |          |           | 90     |         |
|          |          |          |          |           |          |           | 86     | 105     |
|          |          |          |          |           |          |           | 89     | 90      |
|          |          |          |          |           |          |           | 112    |         |
|          |          |          |          |           |          |           | 96     |         |
|          |          |          |          |           |          |           | 93     | 99      |
|          |          |          |          |           |          |           | 105    |         |
| 0.233126 | 11.07138 | 182.731  | 0.254497 | 4.972808  | -0.85794 | 0.007288  | 103    | 112     |
|          |          |          |          |           |          |           | 80     | 105     |
|          |          |          |          |           |          |           | 124    | 122     |
|          |          |          |          |           |          |           | 74     | 105     |
|          |          |          |          |           |          |           | 133    |         |
|          |          |          |          |           |          |           | 111    | 113     |
|          |          |          |          |           |          |           | 119    |         |
|          |          |          |          |           |          |           | 79     | 100     |
|          |          |          |          |           |          |           | 61     | 108     |
| 0.868757 | 22.4373  | 434.652  | 0.264538 | 12.14513  | -1.65292 | -0.03279  | 104    | 105     |
| 0.132456 | 15.61601 | 125.052  | 0.333741 | 8.879874  | -0.3782  | -0.74358  | 95     | 113     |
|          |          |          |          |           |          |           | 107    |         |
|          |          |          |          |           |          |           | 93     |         |
| 0.653246 | 20.13358 | 226.933  | 0.925024 | 9.541394  | -1.51298 | -1.04195  | 104    | 98      |
| 0.88698  | 10.79692 | 307.691  | 0.565969 | 5.958084  | -0.93251 | -0.27441  | 85     | 88      |
| 0.103132 | 4.950909 | 205.148  | 0.365411 | 7.982265  | 0.542398 | -0.43338  | 104    | 99      |
| 0.195228 | 10.86989 | 878.208  | 0.139816 | 7.654958  | 0.453336 | 1.089085  | 70     | 105     |
| 2.746852 | 11.42885 | 79.925   | 0.822467 | 11.72779  | -2.28185 | -1.71436  | 113    | 68      |
| 2.126239 | 12.66733 | 301.558  | 0.36552  | 7.483959  | -1.94476 | -0.15858  | 106    | 113     |
|          |          |          |          |           |          |           | 98     |         |
| 0.266612 | 3.12122  | 283.156  | 0.153706 | 5.479872  | 0.248902 | 0.530599  | 123    | 127     |
| 0.409673 | 6.485342 | 349.394  | 0.266243 | 5.501755  | -0.24033 | 0.317428  | 124    | 132     |
| 0.352809 | 11.03391 | 102.424  | 0.369429 | 6.343096  | -1.4076  | -0.72227  | 109    | 115     |
| 0.249562 | 5.687534 | 377.979  | 0.164103 | 5.562446  | 0.511933 | 0.66052   | 117    | 117     |
| 0.62228  | 5.883401 | 281.653  | 0.673533 | 9.031591  | -0.51496 | -0.68739  | 112    | 117     |
| 1.123214 | 19.93166 | 192.434  | 0.200795 | 11.59306  | -2.09275 | -0.33478  | 115    | 99      |
| 0.188072 | 7.002545 | 345.716  | 0.307736 | 8.887445  | 0.013821 | -0.07454  | 82     | 101     |
| 0.989171 | 14.21853 | 195.609  | 0.215574 | 5.924232  | -1.83507 | 0.043645  | 99     | 112     |
| 0.11601  | 4.523817 | 532.373  | 0.110033 | 4.492019  | 1.503788 | 1.260497  | 86     | 105     |
| 0.262302 | 8.597777 | 276.345  | 0.348363 | 9.241295  | -0.39751 | -0.31177  | 100    | 108     |
|          |          |          |          |           |          |           | 107    |         |
|          |          |          |          |           |          |           | 107    |         |
|          |          |          |          |           |          |           | 100    | 119     |
| 0.504673 | 8.90405  | 331.177  | 0.25113  | 6.268267  | -0.41167 | 0.239674  | 96     | 121     |
| 0.84836  | 14.64516 | 217.197  | 0.231202 | 11.39035  | -1.39655 | -0.3362   | 123    |         |
| 0.876808 | 16.60477 | 218.109  | 1.938673 | 19.46255  | -1.3251  | -1.92512  | 104    | 125     |
| 0.316113 | 13.81557 | 419.333  | 0.14569  | 8.810544  | -0.38905 | 0.512771  | 112    | 124     |
| 0.585295 | 3.975483 | 365.341  | 0.371637 | 9.497327  | -0.163   | -0.19719  | 88     | 118     |

|          |          |         |          |          |          |          |     |     |
|----------|----------|---------|----------|----------|----------|----------|-----|-----|
| 0.526593 | 24.22638 | 152.655 | 0.319764 | 9.670662 | -1.526   | -0.64856 | 108 | 108 |
| 2.284194 | 9.77773  | 138.78  | 0.690083 | 11.36008 | -2.09197 | -1.26511 | 67  | 101 |
| 0.133934 | 7.483195 | 121.467 | 0.184527 | 5.79596  | -0.32827 | -0.14029 | 60  | 104 |
|          |          |         |          |          |          |          | 86  | 94  |
| 2.003216 | 20.32026 | 314.066 | 1.01782  | 11.2573  | -1.95753 | -1.00356 | 96  | 111 |
| 0.32139  | 9.2183   | 220.104 | 0.441935 | 8.43155  | -0.51757 | -0.53962 | 99  | 128 |
|          |          |         |          |          |          |          | 107 | 91  |
| 0.239638 | 6.255549 |         |          |          | 0.067931 | 0.641407 | 133 |     |
|          |          |         |          |          |          |          | 89  | 39  |
|          |          |         |          |          |          |          | 74  |     |
| 1.189285 | 14.64628 | 284.708 | 1.154601 | 9.07816  | -1.95378 | -1.00901 | 77  | 101 |
| 0.332475 | 8.640601 | 196.291 | 0.542721 | 9.390574 | -0.53528 | -0.79874 | 116 | 114 |
|          |          |         |          |          |          |          | 90  | 94  |
| 0.338289 | 7.070984 | 334.067 | 0.261957 | 8.640295 | -0.05417 | 0.020825 | 99  | 112 |
|          |          |         |          |          |          |          | 95  |     |
|          |          |         |          |          |          |          | 100 | 124 |
| 0.413181 | 5.83648  | 364.37  | 0.312087 | 4.74302  | -0.06578 | 0.336952 | 86  | 101 |
|          |          |         |          |          |          |          | 90  |     |
| 0.496922 | 15.34501 | 300.406 | 0.290947 | 8.120013 | -1.11001 | -0.0709  | 113 | 111 |
| 0.248129 | 14.32868 | 255.855 | 0.529926 | 10.80792 | -0.50509 | -0.70908 | 96  | 105 |
| 0.300454 | 8.079816 | 293.919 | 0.191854 | 5.034932 | 0.06649  | 0.468565 | 117 | 111 |
| 1.265252 | 18.96177 | 287.531 | 1.124374 | 8.940816 | -1.65526 | -0.97799 | 104 | 109 |
| 0.236306 | 6.164511 | 427.66  | 0.25984  | 4.110171 | 0.239153 | 0.639613 | 102 | 107 |
| 0.265022 | 8.00791  | 144.048 | 0.269932 | 7.682889 | -0.92997 | -0.441   | 107 | 112 |
| 0.364608 | 13.53771 | 283.594 | 0.261278 | 8.131954 | -0.72841 | -0.04108 | 118 | 120 |
|          |          |         |          |          |          |          | 115 |     |
| 0.729901 | 12.18731 | 227.278 | 0.879043 | 11.51732 | -1.25615 | -1.12326 | 102 | 117 |
|          |          |         |          |          |          |          | 86  |     |
| 0.169288 | 9.639943 | 223.854 | 0.261632 | 6.933703 | -0.10502 | -0.08933 | 91  | 57  |
| 0.138812 | 6.059908 | 406.007 | 0.204529 | 6.10172  | 0.757068 | 0.510194 | 112 | 134 |
|          |          |         |          |          |          |          | 97  |     |
|          |          |         |          |          |          |          | 126 | 126 |
|          |          |         |          |          |          |          | 70  | 109 |
|          |          |         |          |          |          |          | 104 |     |
|          |          |         |          |          |          |          | 111 |     |
|          |          |         |          |          |          |          | 72  |     |
|          |          |         |          |          |          |          | 111 |     |
|          |          |         |          |          |          |          | 68  |     |
|          |          |         |          |          |          |          | 106 | 89  |
|          |          |         |          |          |          |          | 106 |     |
|          |          |         |          |          |          |          | 95  |     |
| 1.175232 | 19.555   | 311.487 | 0.762134 | 17.05876 | -2.37642 | -1.08429 | 87  | 102 |
| 1.2784   | 11.84364 | 292.888 | 0.185994 | 8.017803 | -1.41193 | 0.197133 | 102 | 122 |
|          |          |         |          |          |          |          | 102 |     |
| 0.254119 | 12.09769 | 110.812 | 0.8123   | 14.28572 | -1.06788 | -1.63089 | 100 | 105 |
|          |          |         |          |          |          |          | 117 | 115 |
|          |          |         |          |          |          |          | 87  |     |
| 1.324627 | 13.5584  | 218.887 | 0.250474 | 5.783851 | -1.61388 | 0.035246 | 87  | 110 |
|          |          |         |          |          |          |          | 92  |     |
|          |          |         |          |          |          |          | 89  |     |
| 0.204232 | 11.1543  | 221.345 | 0.216992 | 6.335046 | -0.4384  | 0.07447  | 99  | 112 |



|          |          |         |          |          |          |          |     |     |
|----------|----------|---------|----------|----------|----------|----------|-----|-----|
|          |          |         |          |          |          |          | 59  | 92  |
|          |          |         |          |          |          |          | 107 |     |
|          |          |         |          |          |          |          | 101 | 115 |
|          |          |         |          |          |          |          | 93  |     |
|          |          |         |          |          |          |          | 93  |     |
|          |          |         |          |          |          |          | 87  |     |
|          |          |         |          |          |          |          | 78  | 107 |
|          |          |         |          |          |          |          | 69  | 101 |
|          |          |         |          |          |          |          | 108 | 112 |
|          |          |         |          |          |          |          | 123 | 85  |
|          |          |         |          |          |          |          | 78  | 93  |
|          |          |         |          |          |          |          | 78  |     |
|          |          |         |          |          |          |          | 98  |     |
|          |          |         |          |          |          |          | 78  |     |
|          |          |         |          |          |          |          | 68  |     |
|          |          |         |          |          |          |          | 78  |     |
|          |          |         |          |          |          |          | 105 | 111 |
|          |          |         |          |          |          |          | 122 | 127 |
|          |          |         |          |          |          |          | 82  | 96  |
|          |          |         |          |          |          |          | 89  | 110 |
|          |          |         |          |          |          |          | 80  | 87  |
|          |          |         |          |          |          |          | 90  | 110 |
|          |          |         |          |          |          |          | 109 | 122 |
|          |          |         |          |          |          |          | 97  | 101 |
|          |          |         |          |          |          |          | 71  | 115 |
| 1.574006 | 22.00556 | 336.62  | 0.634887 | 12.08336 | -1.83758 | -0.71992 | 74  | 106 |
|          |          |         |          |          |          |          | 94  | 109 |
|          |          |         |          |          |          |          | 94  | 106 |
|          |          |         |          |          |          |          | 107 |     |
|          |          |         |          |          |          |          | 112 |     |
|          |          |         |          |          |          |          | 107 | 117 |
|          |          |         |          |          |          |          | 88  |     |
| 1.012649 | 12.24179 | 110.186 | 0.340637 | 5.31255  | -2.07474 | -0.52118 | 113 | 128 |
|          |          |         |          |          |          |          | 77  |     |
|          |          |         |          |          |          |          | 88  |     |
| 0.757383 | 18.47097 | 316.179 | 0.549481 | 12.14015 | -1.46464 | -0.67322 | 78  | 100 |
|          |          |         |          |          |          |          | 72  |     |
|          |          |         |          |          |          |          | 96  | 120 |
| 0.55081  | 12.35816 | 189.186 | 0.710499 | 10.15567 | -1.20211 | -1.03023 | 85  | 88  |
| 0.575698 | 6.848244 | 283.914 | 0.358099 | 5.662332 | -0.75441 | -0.01162 | 82  | 97  |
|          |          |         |          |          |          |          | 92  |     |
| 1.679291 | 14.27689 | 312.113 | 0.864593 | 7.309022 | -2.07329 | -0.64826 | 90  | 103 |
| 1.214576 | 12.58379 | 287.648 | 0.683409 | 10.7344  | -1.76527 | -0.78793 | 92  | 106 |
|          |          |         |          |          |          |          | 94  |     |
| 0.421521 | 10.60925 | 134.772 | 0.219759 | 6.154219 | -0.90051 | -0.22047 | 98  | 107 |
|          |          |         |          |          |          |          | 85  |     |
| 0.465763 | 13.9077  | 303.915 | 0.492513 | 6.79821  | -1.34893 | -0.27762 | 70  | 106 |
|          |          |         |          |          |          |          | 76  |     |
|          |          |         |          |          |          |          | 101 |     |
| 0.705456 | 9.232255 | 150.661 | 0.364097 | 9.217706 | -1.14826 | -0.70612 | 78  | 107 |
|          |          |         |          |          |          |          | 98  |     |

|          |          |         |          |          |          |          |     |     |
|----------|----------|---------|----------|----------|----------|----------|-----|-----|
| 0.358804 | 11.19815 |         |          |          | -0.39761 | 1.088909 | 95  |     |
| 0.823188 | 5.71997  | 476.407 | 0.340359 | 6.218065 | -0.42444 | 0.281545 | 75  | 107 |
|          |          |         |          |          |          |          | 104 |     |
| 0.636414 | 7.472659 |         |          |          | -0.67146 | -0.51592 | 102 |     |
| 1.408504 | 13.74507 |         |          |          | -1.65116 | -1.67561 | 105 |     |
| 0.907947 | 10.24147 |         |          |          | -1.20718 | -1.09088 | 100 |     |
| 3.076454 | 15.57095 | 192.904 | 0.637485 | 8.965017 | -2.5069  | -0.87834 | 119 | 120 |
|          |          |         |          |          |          |          | 62  | 105 |
|          |          |         |          |          |          |          | 103 | 70  |
| 1.095988 | 6.225911 | 271.759 | 0.231779 | 5.430164 | -0.8546  | 0.255755 | 108 | 88  |
|          |          |         |          |          |          |          | 51  | 71  |
|          |          |         |          |          |          |          | 96  | 112 |
|          |          |         |          |          |          |          | 64  | 103 |
|          |          |         |          |          |          |          | 59  | 66  |
|          |          |         |          |          |          |          | 73  | 113 |
|          |          |         |          |          |          |          | 76  | 98  |
| 0.233479 | 11.00201 | 336.481 | 0.30586  | 8.945735 | -0.50712 | -0.09144 | 51  | 113 |
|          |          |         |          |          |          |          | 99  | 78  |
|          |          |         |          |          |          |          | 90  |     |
|          |          |         |          |          |          |          | 101 | 120 |
|          |          |         |          |          |          |          | 83  |     |
|          |          |         |          |          |          |          | 93  |     |
|          |          |         |          |          |          |          | 79  | 105 |
|          |          |         |          |          |          |          | 86  | 116 |
|          |          |         |          |          |          |          | 102 | 105 |
|          |          |         |          |          |          |          | 76  |     |
|          |          |         |          |          |          |          | 102 | 125 |
|          |          |         |          |          |          |          | 110 |     |
|          |          |         |          |          |          |          | 59  | 112 |
|          |          |         |          |          |          |          | 74  | 122 |
|          |          |         |          |          |          |          | 71  |     |
|          |          |         |          |          |          |          | 109 | 105 |
|          |          |         |          |          |          |          | 106 | 128 |
|          |          |         |          |          |          |          | 101 | 105 |
|          |          |         |          |          |          |          | 58  | 98  |
|          |          |         |          |          |          |          | 105 |     |
|          |          |         |          |          |          |          | 95  | 111 |
|          |          |         |          |          |          |          | 95  | 120 |
|          |          |         |          |          |          |          | 115 | 85  |
|          |          |         |          |          |          |          | 112 |     |
|          |          |         |          |          |          |          | 96  | 107 |
|          |          |         |          |          |          |          | 105 | 100 |
|          |          |         |          |          |          |          | 98  | 117 |
|          |          |         |          |          |          |          | 111 |     |
|          |          |         |          |          |          |          | 108 |     |
|          |          |         |          |          |          |          | 96  |     |
| 1.075891 | 13.41749 | 708.221 | 0.716091 | 5.531986 | -0.83481 | 0.139043 | 102 | 112 |
|          |          |         |          |          |          |          | 110 | 117 |
| 3.95819  | 23.79892 | 365.839 | 2.568577 | 14.22232 | -2.68471 | -1.60285 | 81  | 104 |
|          |          |         |          |          |          |          | 76  | 92  |
|          |          |         |          |          |          |          | 126 | 115 |

|          |          |         |          |          |          |          |     |     |
|----------|----------|---------|----------|----------|----------|----------|-----|-----|
|          |          |         |          |          |          |          | 94  |     |
| 0.270229 | 14.26728 | 263.335 | 0.287851 | 10.02309 | -0.65835 | -0.27424 | 97  | 108 |
|          |          |         |          |          |          |          | 107 |     |
| 0.584826 | 24.06044 | 554.793 | 0.438885 | 9.754419 | -1.6654  | -0.05923 | 99  | 105 |
|          |          |         |          |          |          |          | 85  |     |
|          |          |         |          |          |          |          | 115 |     |
|          |          |         |          |          |          |          | 90  | 81  |
| 0.383312 | 27.26138 | 645.883 | 0.680522 | 13.78955 | -1.02244 | -0.44657 | 94  | 118 |
| 0.181439 | 7.822784 |         |          |          | 0.259105 | 0.07555  | 108 |     |
|          |          |         |          |          |          |          | 78  | 109 |
| 1.298781 | 12.50319 | 278.513 | 0.238435 | 4.975603 | -1.99928 | 0.307571 | 85  | 102 |
| 0.134632 | 6.880196 | 251.488 | 0.236442 | 4.805132 | 0.251278 | 0.271138 | 92  | 116 |
| 2.654078 | 11.07837 | 95.731  | 2.751973 | 6.147182 | -2.29147 | -1.93752 | 95  | 108 |
| 0.372393 | 11.85553 | 193.077 | 0.312775 | 7.875132 | -1.16955 | -0.36725 | 91  | 95  |
| 0.255277 | 7.734195 | 283.679 | 0.238329 | 4.653966 | -0.1779  | 0.360682 | 78  | 112 |
|          |          |         |          |          |          |          | 101 | 100 |
| 0.840053 | 12.79563 | 257.332 | 0.824448 | 5.952749 | -1.41984 | -0.61199 | 97  | 100 |
| 1.675083 | 7.458841 |         |          |          | -1.33395 | 0.725466 | 86  |     |
| 0.720357 | 12.32527 | 167.785 | 0.702886 | 9.482172 | -1.10903 | -1.05462 | 106 | 105 |
| 0.888499 | 10.1886  | 244.3   | 1.98292  | 10.53645 | -1.27638 | -1.51134 | 98  | 108 |
| 0.565374 | 6.8636   | 199.289 | 0.555069 | 8.476912 | -0.31533 | -0.74131 | 72  | 96  |
|          |          |         |          |          |          |          | 103 | 101 |
| 0.870468 | 7.816703 | 422.402 | 0.497077 | 7.667023 | -0.86836 | -0.15526 | 104 | 107 |
| 1.167334 | 13.45123 | 179.786 | 1.846005 | 9.56481  | -1.74807 | -1.59305 | 107 | 116 |
| 0.558272 | 9.395895 | 505.841 | 0.214707 | 6.187648 | -0.81703 | 0.608177 | 101 |     |
| 0.590782 | 8.891957 | 164.69  | 0.313749 | 7.394246 | -1.15734 | -0.42772 | 113 | 124 |
| 0.805672 | 14.05473 | 238.433 | 0.527371 | 5.161981 | -1.74921 | -0.29945 | 60  | 107 |
|          |          |         |          |          |          |          | 97  | 112 |
|          |          |         |          |          |          |          | 60  | 104 |
| 0.6826   | 6.184098 |         |          |          | -0.66138 | 0.202122 | 81  |     |
| 0.665472 | 13.17312 | 157.601 | 0.605637 | 9.434743 | -0.60809 | -0.99982 | 109 | 111 |
| 1.269319 | 9.862371 | 374.726 | 1.168878 | 8.58573  | -1.61924 | -0.81745 | 78  | 96  |
| 2.004295 | 13.09219 | 431.074 | 1.265667 | 7.657259 | -2.11117 | -0.7117  | 84  | 103 |
| 0.666199 | 11.38681 | 203.627 | 0.310468 | 9.297141 | -1.27311 | -0.43154 | 88  |     |
| 0.465122 | 7.835239 | 402.942 | 0.185789 | 5.381912 | -0.21932 | 0.643566 | 83  | 110 |
| 0.964354 | 13.08688 | 266.704 | 0.808509 | 7.44597  | -1.69073 | -0.71412 | 86  | 109 |
| 0.473462 | 9.894433 | 241.039 | 0.531617 | 7.557416 | -1.09028 | -0.53016 | 89  | 109 |
| 0.461214 | 12.08205 | 291.293 | 0.607967 | 5.491414 | -1.29531 | -0.3018  | 97  | 109 |
|          |          |         |          |          |          |          | 56  |     |
| 0.140376 | 1.712322 | 484.247 | 0.116899 | 3.211743 | 1.214139 | 1.374318 | 108 | 108 |
| 0.272643 | 1.897271 | 369.701 | 0.196566 | 4.151033 | 0.820384 | 0.716743 | 74  | 99  |
| 0.470247 | 10.95553 | 346.539 | 0.150165 | 5.004649 | -0.64196 | 0.727713 | 82  | 96  |
| 1.211173 | 6.533209 | 468.67  | 0.526099 | 6.117103 | -0.43908 | 0.012571 | 98  | 110 |
|          |          |         |          |          |          |          | 109 |     |
| 1.483096 | 16.2282  | 210.367 | 0.525418 | 10.83969 | -2.03308 | -0.824   | 86  | 104 |
| 0.377861 | 10.29679 | 429.562 | 0.824288 | 11.97371 | -0.67541 | -0.72485 | 92  | 107 |
| 0.330859 | 7.934094 | 227.446 | 0.336941 | 9.420287 | -0.22125 | -0.42201 | 107 | 120 |
| 0.414626 | 9.590237 | 489.222 | 0.150717 | 6.403012 | -0.08129 | 0.78696  | 112 | 118 |
|          |          |         |          |          |          |          | 100 | 117 |
| 0.897994 | 13.91767 | 484.247 | 0.534073 | 8.460572 | -1.16574 |          | 83  | 104 |
| 0.986722 | 15.9871  | 215.476 | 1.132382 | 9.83656  | -1.38316 | -1.21221 | 101 | 99  |

|          |          |         |          |          |          |          |     |     |
|----------|----------|---------|----------|----------|----------|----------|-----|-----|
| 1.216236 | 15.06622 | 461.389 | 0.319615 | 7.960271 | -2.00474 | 0.147849 | 72  | 104 |
|          |          |         |          |          |          |          | 107 |     |
|          |          |         |          |          |          |          | 52  | 107 |
| 0.794674 | 11.68435 | 338.381 | 0.259262 | 7.450175 | -1.15915 |          | 113 |     |
| 1.969481 | 16.81066 | 206.333 | 1.317184 | 9.686386 | -2.35808 | -1.31897 | 113 | 116 |
|          |          |         |          |          |          |          | 84  |     |
| 3.265506 | 9.9659   | 196.794 | 0.610567 | 6.614182 | -2.06292 | -0.65641 | 105 | 112 |
| 0.2571   | 14.51147 | 258.617 | 0.195595 | 6.570463 | -0.60286 | 0.212163 | 114 | 119 |
| 1.839395 | 22.5569  | 171.625 | 2.09242  | 17.76062 | -2.47065 | -2.05571 | 98  | 96  |
| 0.843287 | 8.629723 | 255.122 | 0.703551 | 7.203889 | -0.80066 | -0.63675 | 108 | 112 |
| 0.505818 | 4.098008 | 197.737 | 0.59069  | 5.009318 | -0.1944  | -0.46454 | 105 | 121 |
| 0.322441 | 8.161723 | 292.874 | 0.141178 | 6.340173 | -0.01152 | 0.513757 | 75  | 76  |
| 0.324882 | 14.66376 |         |          |          | -0.82812 | -0.87075 | 91  |     |
| 0.348193 | 16.89207 |         |          |          | -0.69848 | 0.010277 | 90  |     |
| 0.890462 | 13.32838 | 251.386 | 0.199202 | 6.478496 | -1.39816 | 0.192045 | 108 | 114 |
| 1.015721 | 19.78871 | 223.133 | 1.090081 | 11.07631 | -1.96626 | -1.23948 | 82  | 103 |
|          |          |         |          |          |          |          | 109 | 107 |
|          |          |         |          |          |          |          | 104 | 113 |
| 4.831025 | 30.71968 | 69.665  | 1.657371 | 20.82746 | -3.39967 | -2.53158 | 93  | 115 |
|          |          |         |          |          |          |          | 76  |     |
|          |          |         |          |          |          |          | 98  | 121 |
| 0.207536 | 6.652226 | 502.873 | 0.144195 | 4.94143  | 0.425153 | 0.994364 | 84  | 97  |
| 0.325409 | 9.559841 | 217.31  | 0.886848 | 9.711057 | -1.09109 | -1.05323 | 106 | 100 |
|          |          |         |          |          |          |          | 105 |     |
| 0.722391 | 12.37616 | 246.245 | 1.319233 | 8.773239 | -1.06956 | -1.15536 | 108 | 113 |
| 0.723766 | 18.26074 | 236.543 | 2.42178  | 21.81189 | -1.63018 |          | 90  | 91  |
|          |          |         |          |          |          |          | 67  | 78  |
|          |          |         |          |          |          |          | 63  | 118 |
|          |          |         |          |          |          |          | 77  | 107 |
|          |          |         |          |          |          |          | 97  |     |
|          |          |         |          |          |          |          | 93  | 119 |
|          |          |         |          |          |          |          | 93  |     |
|          |          |         |          |          |          |          | 78  | 66  |
|          |          |         |          |          |          |          | 70  | 108 |
|          |          |         |          |          |          |          | 78  | 108 |
|          |          |         |          |          |          |          | 111 | 123 |
|          |          |         |          |          |          |          | 98  | 115 |
|          |          |         |          |          |          |          | 85  | 123 |
|          |          |         |          |          |          |          | 105 | 126 |
|          |          |         |          |          |          |          | 121 |     |
|          |          |         |          |          |          |          | 86  |     |
| 1.498828 | 10.3667  | 360.742 | 1.760699 | 12.38052 | -1.67628 | -1.30525 | 115 | 107 |
| 0.113416 | 7.860468 | 149.366 | 0.123779 | 8.303207 | -0.15337 | 0.011302 | 89  | 109 |
|          |          |         |          |          |          |          | 115 |     |
| 1.783786 | 30.18471 | 355.949 | 2.637125 | 13.37083 | -2.6815  | -1.59814 | 61  | 105 |
|          |          |         |          |          |          |          | 95  |     |
| 0.130655 | 4.764813 | 339.908 | 0.154427 | 5.294494 | 1.230694 | 0.663004 | 125 | 128 |
|          |          |         |          |          |          |          | 83  | 107 |
| 1.91235  | 15.72857 | 161.142 | 0.614451 | 8.09404  | -2.29349 | -0.90298 | 104 | 104 |
| 0.657184 | 6.308174 | 177.61  | 0.350277 | 9.13216  | -0.9726  | -0.57723 | 78  | 116 |
| 0.118036 | 4.018678 | 421.684 | 0.15637  | 4.193279 | 1.418378 | 0.93601  | 72  | 88  |







|          |          |         |          |          |          |          |     |     |
|----------|----------|---------|----------|----------|----------|----------|-----|-----|
|          |          |         |          |          |          |          | 111 | 113 |
|          |          |         |          |          |          |          | 93  |     |
|          |          |         |          |          |          |          | 114 |     |
|          |          |         |          |          |          |          | 97  |     |
| 0.10711  | 7.267763 | 385.583 | 0.157534 | 6.437876 | 0.773624 | 0.607253 | 98  | 105 |
|          |          |         |          |          |          |          | 115 |     |
|          |          |         |          |          |          |          | 118 | 107 |
|          |          |         |          |          |          |          | 95  |     |
| 0.54803  | 3.979269 | 213.73  | 0.324951 | 6.651958 | -0.63736 | -0.22524 | 104 | 109 |
| 0.222024 | 14.23334 | 358.046 | 0.198569 | 9.740488 | -0.46231 | 0.160557 | 72  | 100 |
| 0.463907 | 14.60383 | 338.951 | 0.412435 | 5.140722 | -0.60578 | 0.070042 | 94  | 94  |
|          |          |         |          |          |          |          | 103 |     |
|          |          |         |          |          |          |          | 111 |     |
| 0.80268  | 11.05393 | 253.912 | 0.455868 | 7.153739 | -1.43744 | -0.37137 | 98  | 115 |
|          |          |         |          |          |          |          | 110 | 113 |
|          |          |         |          |          |          |          | 122 | 108 |
|          |          |         |          |          |          |          | 64  |     |
| 1.002896 | 9.671634 | 281.646 | 0.232374 | 6.362494 | -1.56353 | 0.178261 | 91  | 108 |
| 7.048655 | 20.37422 | 623.229 | 0.301054 | 6.066435 | -2.82247 | 0.539924 | 79  | 124 |
| 0.219914 | 6.887544 | 243.414 | 0.237263 | 4.576438 | -0.16537 | 0.278982 | 113 | 120 |
|          |          |         |          |          |          |          | 116 | 117 |
|          |          |         |          |          |          |          | 43  |     |
| 0.386362 | 11.58483 | 170.632 | 1.47615  | 8.915258 | -0.45844 |          | 114 |     |
| 0.210913 | 7.957009 | 265.738 | 0.260433 | 8.25306  | -0.13391 | -0.08815 | 106 | 126 |
|          |          |         |          |          |          |          | 105 |     |
|          |          |         |          |          |          |          | 115 |     |
|          |          |         |          |          |          |          | 124 | 125 |
| 1.657117 | 23.28396 | 80.292  | 0.856506 | 13.56051 | -2.74483 | -1.8206  | 91  | 105 |
| 0.452526 | 8.709876 | 419.841 | 0.175882 | 6.608963 | -0.27128 | 0.575294 | 83  | 119 |
| 0.245028 | 6.854085 | 251.495 | 0.349056 | 5.155528 | 0.149419 | -0.01279 | 74  | 97  |
| 0.159319 | 6.395345 | 589.622 | 0.125702 | 5.062314 | 0.895489 | 1.165598 | 125 | 123 |
| 0.190464 | 7.201821 |         |          |          | 0.088363 | 0.31083  | 121 |     |
|          |          |         |          |          |          |          | 119 | 109 |
|          |          |         |          |          |          |          | 99  |     |
|          |          |         |          |          |          |          | 109 |     |
|          |          |         |          |          |          |          | 77  |     |
| 0.411803 | 8.156139 | 290.231 | 0.292884 | 6.511133 | -0.91238 | 0.039717 | 84  | 115 |
| 0.191868 | 18.73488 | 247.25  | 0.238497 | 11.3421  | -0.74612 | -0.27336 | 73  | 106 |
|          |          |         |          |          |          |          | 91  |     |
| 0.21591  | 7.802058 |         |          |          | 0.217296 | 0.068066 | 108 |     |
|          |          |         |          |          |          |          | 102 |     |
| 0.419823 | 4.942543 | 197.154 | 0.281235 | 7.608316 | -0.0006  | -0.26845 | 105 | 117 |
|          |          |         |          |          |          |          | 115 |     |
|          |          |         |          |          |          |          | 111 |     |
|          |          |         |          |          |          |          | 119 |     |
|          |          |         |          |          |          |          | 108 |     |
| 0.893298 | 11.40742 | 228.801 | 1.134944 | 9.243655 | -1.35401 | -1.14056 | 116 | 118 |
| 0.334748 | 7.992599 | 432.142 | 0.255526 | 12.1713  | -0.7874  | -0.01635 | 117 | 112 |
| 0.190137 | 6.533713 | 161.95  | 0.153161 | 6.04102  | -0.17015 | 0.125968 | 105 | 96  |
| 0.419441 | 11.46797 |         |          |          | -1.09899 | -0.49105 | 109 |     |
| 0.255016 | 7.271384 |         |          |          | -0.42107 | -1.19373 | 111 |     |

|          |          |         |          |          |          |          |     |     |
|----------|----------|---------|----------|----------|----------|----------|-----|-----|
| 0.411584 | 21.99438 | 312.548 | 2.143477 | 15.75463 | -1.37984 | -1.6493  | 98  | 104 |
|          |          |         |          |          |          |          | 108 |     |
|          |          |         |          |          |          |          | 111 |     |
|          |          |         |          |          |          |          | 112 | 75  |
|          |          |         |          |          |          |          | 111 | 115 |
|          |          |         |          |          |          |          | 70  |     |
|          |          |         |          |          |          |          | 104 | 113 |
|          |          |         |          |          |          |          | 90  |     |
|          |          |         |          |          |          |          | 74  |     |
|          |          |         |          |          |          |          | 108 |     |
|          |          |         |          |          |          |          | 82  | 108 |
|          |          |         |          |          |          |          | 121 |     |
|          |          |         |          |          |          |          | 120 |     |
|          |          |         |          |          |          |          | 94  |     |
|          |          |         |          |          |          |          | 114 | 100 |
|          |          |         |          |          |          |          | 96  |     |
|          |          |         |          |          |          |          | 104 | 106 |
|          |          |         |          |          |          |          | 94  |     |
| 0.336274 | 7.21479  | 207.581 | 0.114535 | 4.549979 | -0.45232 | 0.636319 | 95  | 117 |
|          |          |         |          |          |          |          | 101 |     |
|          |          |         |          |          |          |          | 118 |     |
|          |          |         |          |          |          |          | 91  |     |
|          |          |         |          |          |          |          | 97  |     |
| 0.586961 | 11.50231 | 318.031 | 0.395484 | 7.620428 | -0.79994 | -0.18536 | 111 | 111 |
| 1.735278 | 20.67969 | 226.024 | 0.462181 | 12.27159 | -2.29079 | -0.77814 | 97  | 106 |
|          |          |         |          |          |          |          | 84  |     |
| 0.232076 | 6.742607 | 250.572 | 0.244515 | 6.400214 | 0.129795 | 0.071    | 67  | 116 |
| 1.017166 | 5.524324 | 464.832 | 0.324837 | 3.971931 | -0.39569 | 0.573713 | 113 | 107 |
|          |          |         |          |          |          |          | 114 | 109 |
| 0.563446 | 9.245826 | 220.609 | 0.490032 | 6.623919 | -1.00973 | -0.45425 | 71  | 105 |
| 0.932969 | 14.0244  | 179.738 | 0.364539 | 8.005791 | -1.79789 | -0.51423 | 88  | 87  |
|          |          |         |          |          |          |          | 78  | 106 |
|          |          |         |          |          |          |          | 94  | 103 |
| 0.584677 | 16.04407 | 586.419 | 0.308711 | 11.36665 | -1.12562 | 0.097404 | 117 | 115 |
| 1.438564 | 17.908   | 258.115 | 0.511751 | 10.10933 | -1.84663 | -0.64213 | 124 | 120 |
| 3.473168 | 14.80769 | 340.305 | 1.872052 | 9.309005 | -2.30399 | -1.20659 | 106 | 103 |
| 1.130783 | 15.56143 | 282.738 | 0.750581 | 9.149425 | -1.60825 | -0.75845 | 98  | 110 |
| 0.379868 | 9.335657 |         |          |          | -0.43595 | -0.42404 | 88  |     |
| 0.203892 | 4.020555 | 474.172 | 0.172781 | 6.29865  | 0.472499 | 0.6923   | 112 | 113 |
| 0.292071 | 18.8662  | 156.306 | 0.852257 | 11.22598 | -1.1175  | -1.31291 | 117 | 109 |
| 2.378065 | 15.44992 |         |          |          | -2.51082 | -0.27114 | 92  |     |
| 1.033542 | 15.44293 | 293.084 | 0.41801  | 8.349277 | -1.71071 | -0.32518 | 95  | 129 |
| 0.931219 | 14.61277 | 337.61  | 0.246398 | 6.871587 | -1.5774  | 0.206493 | 100 | 116 |
| 0.363976 | 7.451329 | 285.281 | 0.333559 | 7.10727  | -0.43692 | -0.10477 | 113 | 122 |
| 0.574567 | 9.610733 | 242.096 | 0.234883 | 5.928249 | -0.85041 | 0.121827 | 108 | 100 |
| 0.897314 | 11.80105 | 186.465 | 0.618286 | 8.316991 | -1.42291 | -0.83513 | 85  | 123 |
| 0.617067 | 10.11353 | 245.487 | 0.736424 | 8.921939 | -0.88715 | -0.81707 | 103 | 94  |
|          |          |         |          |          |          |          | 120 |     |
|          |          |         |          |          |          |          | 71  |     |
|          |          |         |          |          |          |          | 105 |     |
| 0.128488 | 4.112565 | 475.581 | 0.137928 | 4.551355 | 1.118009 | 1.038888 | 59  | 79  |

|          |          |         |          |          |          |          |     |     |
|----------|----------|---------|----------|----------|----------|----------|-----|-----|
| 6.772497 | 17.1454  |         |          |          |          |          | 118 | 98  |
|          |          |         |          |          |          |          | 113 |     |
|          |          |         |          |          |          |          | 99  |     |
|          |          |         |          |          |          |          | 100 | 106 |
|          |          |         |          |          |          |          | 103 |     |
|          |          |         |          |          |          |          | 52  |     |
|          |          |         |          |          |          |          | 69  | 94  |
|          |          |         |          |          |          |          | 78  |     |
|          |          |         |          |          |          |          | 68  | 115 |
|          |          |         |          |          |          |          | 77  |     |
| 0.203895 | 6.203659 | 216.958 | 0.493843 | 6.791122 | 0.154615 | -0.48431 | 77  | 88  |
|          |          |         |          |          |          |          | 53  | 83  |
|          |          |         |          |          |          |          | 85  |     |
|          |          |         |          |          |          |          | 73  | 93  |
|          |          |         |          |          |          |          | 106 |     |
|          |          |         |          |          |          |          | 65  | 105 |
|          |          |         |          |          |          |          | 91  |     |
|          |          |         |          |          |          |          | 114 |     |
|          |          |         |          |          |          |          | 95  |     |
|          |          |         |          |          |          |          | 106 |     |
|          |          |         |          |          |          |          | 83  |     |
|          |          |         |          |          |          |          | 105 | 138 |
|          |          |         |          |          |          |          | 95  | 105 |
|          |          |         |          |          |          |          | 91  | 109 |
|          |          |         |          |          |          |          | 109 |     |
| 0.527645 | 13.02942 | 195.7   | 1.302068 | 8.277694 | -1.0716  | -1.25    | 71  | 85  |
|          |          |         |          |          |          |          | 78  | 94  |
|          |          |         |          |          |          |          | 64  | 136 |
|          |          |         |          |          |          |          | 108 | 115 |
|          |          |         |          |          |          |          | 86  | 99  |
| 1.500371 | 7.941642 | 445.558 | 0.909959 | 5.323147 | -1.1811  | -0.26948 | 69  | 100 |
|          |          |         |          |          |          |          | 86  | 115 |
|          |          |         |          |          |          |          | 88  |     |
|          |          |         |          |          |          |          | 95  | 121 |
|          |          |         |          |          |          |          | 108 | 122 |
| 0.706883 | 11.03444 | 439.387 | 0.491809 | 5.308247 | -1.05662 | 0.101774 | 91  | 89  |
|          |          |         |          |          |          |          | 63  |     |
|          |          |         |          |          |          |          | 60  |     |
|          |          |         |          |          |          |          | 78  |     |
|          |          |         |          |          |          |          | 83  | 104 |
|          |          |         |          |          |          |          | 86  | 72  |
|          |          |         |          |          |          |          | 92  | 107 |
|          |          |         |          |          |          |          | 79  | 118 |
|          |          |         |          |          |          |          | 80  |     |
|          |          |         |          |          |          |          | 117 | 108 |
| 0.366133 | 5.524554 | 134.298 | 0.374562 | 4.698825 | -0.41052 | -0.38367 | 106 | 113 |
|          |          |         |          |          |          |          | 74  | 113 |
|          |          |         |          |          |          |          | 99  |     |
|          |          |         |          |          |          |          | 101 |     |
|          |          |         |          |          |          |          | 88  |     |
| 1.390483 | 36.95925 | 66.568  | 1.175811 | 21.95516 | -2.779   | -2.39167 | 104 |     |

|          |          |         |          |          |          |          |     |     |
|----------|----------|---------|----------|----------|----------|----------|-----|-----|
|          |          |         |          |          |          |          | 117 |     |
|          |          |         |          |          |          |          | 106 |     |
|          |          |         |          |          |          |          | 110 |     |
| 0.289464 | 13.47977 | 322.876 | 0.252985 | 8.14235  | -0.59162 | 0.057881 | 76  | 117 |
| 1.307599 | 32.26161 | 235.213 | 0.915277 | 18.44461 | -2.15384 | -1.40752 | 113 | 116 |
| 0.586069 | 9.631952 | 295.435 | 1.830388 | 7.61675  | -0.77415 | -1.15776 | 96  | 96  |
| 0.223405 | 6.784189 | 705.971 | 0.168643 | 6.044351 | 0.720194 | 0.982526 | 93  |     |
| 0.153912 | 5.843213 | 348.918 | 0.202808 | 7.258157 | 0.580358 | 0.31354  | 76  | 96  |
|          |          |         |          |          |          |          | 120 | 114 |
| 1.124581 | 16.91034 | 420.241 | 0.555853 | 9.675708 | -1.67361 | -0.3692  | 113 |     |
| 1.045623 | 20.63283 | 0       | 2.471975 | 15.41554 | -2.70047 |          | 63  | 94  |
|          |          |         |          |          |          |          | 103 |     |
|          |          |         |          |          |          |          | 110 | 115 |
| 1.245189 | 15.93036 | 169.986 | 1.387804 | 14.98248 | -1.82971 | -1.72226 | 118 | 109 |
|          |          |         |          |          |          |          | 90  | 91  |
|          |          |         |          |          |          |          | 103 | 86  |
|          |          |         |          |          |          |          | 108 |     |
| 3.728463 | 19.49337 | 192.9   | 2.653248 | 11.74902 | -3.08112 | -1.88537 | 75  | 74  |
| 1.660455 | 6.618534 |         |          |          | -0.95223 | -1.03162 | 105 |     |
| 0.324909 | 4.771717 | 410.377 | 0.233511 | 5.973599 | 0.368362 | 0.447633 | 102 | 98  |
| 0.652957 | 15.17632 | 162.558 | 0.420411 | 11.64049 | -1.62927 | -0.88799 | 105 | 99  |
| 3.164439 | 38.81052 | 78.896  | 2.39736  | 20.53718 | -3.3131  | -2.66248 | 86  | 117 |
| 1.728377 | 24.95522 | 325.688 | 0.694093 | 11.02664 | -2.73787 | -0.73847 | 104 | 103 |
| 0.694753 | 17.25348 | 196.673 | 0.916431 | 12.89071 | -1.62611 | -1.30169 | 103 | 106 |
|          |          |         |          |          |          |          | 123 | 102 |
|          |          |         |          |          |          |          | 101 | 111 |
| 1.830359 | 24.17758 | 235.521 | 1.051543 | 9.991471 | -2.47223 | -1.12412 | 100 | 110 |
| 0.201866 | 4.712577 | 281.326 | 0.147643 | 5.629921 | 0.406883 | 0.5348   | 97  | 91  |
| 0.268107 | 15.7308  | 405.079 | 0.126486 | 7.260629 | -0.82428 | 0.699968 | 104 | 107 |
| 1.860814 | 26.70564 | 187.019 | 0.495943 | 14.34862 | -2.86366 | -1.02881 | 58  | 75  |
|          |          |         |          |          |          |          | 106 | 116 |
|          |          |         |          |          |          |          | 77  | 101 |
|          |          |         |          |          |          |          | 104 |     |
| 0.382126 | 13.48541 | 449.955 | 0.316778 | 7.125542 | -0.77513 | 0.206314 | 112 | 113 |
| 0.365522 | 12.21792 |         |          |          | -0.57245 | -1.04782 | 114 |     |
| 1.392609 | 10.58439 | 357.32  | 1.324459 | 12.57597 | -1.07056 | -1.15042 | 110 | 110 |
| 0.269729 | 6.599234 | 264.974 | 0.186963 | 5.134814 | 0.106532 | 0.407983 | 106 | 82  |
|          |          |         |          |          |          |          | 51  | 100 |
| 1.544833 | 10.47663 | 247.275 | 1.1205   | 8.862669 | -1.20057 | -1.06118 | 115 | 123 |
| 0.420401 | 9.935482 | 390.638 | 0.247777 | 6.450122 | -0.44988 | 0.332575 | 98  | 95  |
| 0.26852  | 3.810362 |         |          |          | -0.06485 | -0.10842 | 94  |     |
| 1.113523 | 10.85536 | 323.714 | 0.795677 | 5.461469 | -1.02108 | -0.39834 | 105 | 115 |
| 0.778282 | 8.980654 | 512.552 | 0.523095 | 11.03703 | -1.15504 | -0.29119 | 89  | 113 |
|          |          |         |          |          |          |          | 107 | 113 |
| 1.187961 | 20.11738 | 279.397 | 1.446996 | 6.764455 | -1.45118 | -0.97921 | 92  | 109 |
| 0.815569 | 9.102645 | 258     | 0.535709 | 9.616173 | -0.99125 | -0.63982 | 100 | 112 |
| 7.863444 | 37.39799 | 268.112 | 0.336477 | 8.460132 | -3.79085 | -0.25501 | 92  | 111 |
| 0.232027 | 6.604078 | 339.558 | 0.295852 | 7.483537 | 0.214355 |          | 97  | 119 |
|          |          |         |          |          |          |          | 86  | 102 |
| 0.422728 | 20.52081 | 288.852 | 0.339427 | 9.812291 | -1.08314 | -0.30547 | 97  | 106 |
| 0.234458 | 14.97656 | 366.232 | 0.195543 | 6.206773 | -0.23313 | 0.463389 | 113 | 123 |

|          |          |          |          |          |          |          |     |     |
|----------|----------|----------|----------|----------|----------|----------|-----|-----|
|          |          |          |          |          |          |          | 109 |     |
| 1.588902 | 19.90143 | 213.368  | 0.991094 | 14.88918 | -2.08297 | -1.38551 | 97  | 104 |
| 0.941623 | 15.14709 | 304.369  | 0.081905 | 2.767395 | -1.43855 | 1.399802 | 96  | 105 |
| 1.928042 | 14.48393 | 376.702  | 0.852721 | 5.979506 | -1.72197 | -0.40338 | 70  | 101 |
| 0.218041 | 7.014193 | 566.506  | 0.14395  | 3.904221 | 0.542934 | 1.218677 | 92  | 110 |
| 0.967203 | 11.55545 | 469.312  | 0.553627 | 7.728196 | -0.78248 | -0.16163 | 74  | 99  |
| 1.514804 | 15.80633 | 239.085  | 0.430934 | 7.916221 | -1.84142 | -0.43554 | 100 | 111 |
| 0.35168  | 16.07063 | 383.308  | 0.162467 | 10.35003 | -0.71762 |          | 95  | 107 |
| 0.658954 | 11.87923 | 259.573  | 0.415988 | 9.409294 | -1.15209 | -0.46921 | 102 | 105 |
| 2.222123 | 20.75772 | 113.01   | 0.839799 | 14.23595 | -2.56983 | -1.63687 | 80  | 79  |
| 1.571729 | 15.76176 | 458.541  | 0.240976 | 6.136554 | -1.78292 | 0.480329 | 78  | 103 |
| 2.176514 | 29.18773 | 371.807  | 0.907348 | 12.1055  | -2.5204  | -0.87662 | 103 | 102 |
| 0.472747 | 10.21663 |          |          |          | -0.74841 | -0.84866 | 46  | 46  |
| 0.256698 | 8.160916 | 603.359  | 0.178035 | 7.654697 | 0.239344 | 0.702298 | 52  | 106 |
| 1.551016 | 12.9978  | 476.21   | 0.237395 | 6.126666 | -1.23664 | 0.51417  | 115 | 112 |
| 1.081331 | 13.86431 |          |          |          | -1.3899  | -0.24569 | 72  |     |
| 0.335717 | 12.17758 | 254.004  | 0.541129 | 12.97651 | -0.78585 | -0.83661 | 95  | 98  |
| 0.64483  | 16.70654 | 224.773  | 0.36146  | 8.44913  | -1.78259 | -0.40571 | 56  | 118 |
| 0.219398 | 6.827664 | 331.823  | 0.245959 | 5.167621 | 0.183079 | 0.373435 | 101 | 114 |
| 0.647383 | 7.032049 | 307.679  | 1.333449 | 8.791111 | -0.63482 | -1.02959 | 80  | 97  |
| 1.03796  | 15.07033 | 385.575  | 0.341227 | 9.155791 | -1.3408  | -0.08925 | 94  | 117 |
| 1.193747 | 18.28831 | 443.199  | 0.928737 | 10.26897 | -1.54502 | -0.68518 | 95  | 106 |
|          |          |          |          |          |          |          | 90  |     |
| 0.824265 | 7.629927 | 291.976  | 0.213153 | 5.925242 | -1.0158  | 0.298042 | 109 | 128 |
|          |          |          |          |          |          |          | 111 |     |
| 1.053889 | 6.637861 | 241.899  | 0.999813 | 6.833196 | -1.01444 | -0.84951 | 108 | 109 |
|          |          |          |          |          |          |          | 103 |     |
|          |          |          |          |          |          |          | 64  |     |
| 0.525567 | 11.19033 | 402.889  | 0.226716 | 6.882168 | -0.70536 | 0.366612 | 81  | 101 |
|          |          |          |          |          |          |          | 55  |     |
| 3.173757 | 19.42049 |          |          |          | -2.58773 |          | 97  |     |
| 1.298461 | 10.36356 |          |          |          | -1.62101 | 0.213041 | 77  |     |
| 0.349543 | 13.46805 | 198.05   | 0.566115 | 7.86747  | -0.9613  | -0.71187 | 81  | 102 |
| 0.626822 | 11.17832 | 188.824  | 0.423335 | 5.837444 | -1.10232 | -0.38284 | 79  | 106 |
|          |          |          |          |          |          |          | 101 | 85  |
| 0.887214 | 10.60457 | 426.022  | 0.377344 | 5.081747 | -0.98528 |          | 92  | 115 |
| 4.326834 | 27.43103 | 380.324  | 1.630753 | 18.72898 | -3.06734 |          | 95  | 108 |
| 0.465083 | 10.90293 | 169.9225 | 0.302757 | 10.91815 | -0.53221 | -0.62401 | 62  | 81  |
|          |          |          |          |          |          |          | 114 |     |
| 1.228077 | 16.55978 | 475.492  | 0.319056 | 13.23674 | -1.5637  | -0.14563 | 115 | 113 |
| 0.31041  | 11.72256 | 390.629  | 0.267114 | 9.126646 | -0.69266 | 0.071459 | 73  | 90  |
|          |          |          |          |          |          |          | 109 |     |
| 0.826498 | 20.23512 | 124.271  | 0.318944 | 14.79544 | -1.37493 | -1.02759 | 99  | 110 |
|          |          |          |          |          |          |          | 67  |     |
| 0.231699 | 8.666049 | 311.798  | 0.16037  | 6.95514  | -0.15752 | 0.415881 | 66  | 76  |
| 11.88227 | 23.10436 | 47.822   | 1.374572 | 14.60281 | -4.05299 | -2.43694 | 122 | 123 |
| 0.275824 | 8.12873  |          |          |          | 0.252818 | 0.043944 | 107 |     |
| 2.958757 | 41.88818 | 303.826  | 0.587756 | 16.5328  | -3.53968 | -0.92443 | 97  | 107 |
| 0.201814 | 5.493305 |          |          |          | 0.108365 | 0.038836 | 98  |     |
|          |          |          |          |          |          |          | 137 |     |
|          |          |          |          |          |          |          | 86  | 104 |

|          |          |         |          |          |          |          |     |     |
|----------|----------|---------|----------|----------|----------|----------|-----|-----|
| 0.883556 | 13.25063 | 219.722 | 0.590228 | 11.63293 | -1.81491 | -0.91045 | 107 | 69  |
|          |          |         |          |          |          |          | 113 | 118 |
|          |          |         |          |          |          |          | 95  |     |
|          |          |         |          |          |          |          | 85  |     |
|          |          |         |          |          |          |          | 84  | 109 |
|          |          |         |          |          |          |          | 85  |     |
|          |          |         |          |          |          |          | 110 |     |
|          |          |         |          |          |          |          | 61  |     |
|          |          |         |          |          |          |          | 99  |     |
|          |          |         |          |          |          |          | 115 |     |
|          |          |         |          |          |          |          | 90  |     |
|          |          |         |          |          |          |          | 113 | 112 |
|          |          |         |          |          |          |          | 120 | 118 |
|          |          |         |          |          |          |          | 100 | 138 |
|          |          |         |          |          |          |          | 70  |     |
| 0.250063 | 4.661262 | 116.529 | 0.514857 | 6.460375 | -0.8671  | -0.8559  | 126 | 120 |
|          |          |         |          |          |          |          | 101 |     |
|          |          |         |          |          |          |          | 94  |     |
|          |          |         |          |          |          |          | 115 |     |
| 0.995652 | 7.802356 | 298.712 | 0.596184 | 5.798712 | -1.0981  | -0.30775 | 113 | 120 |
|          |          |         |          |          |          |          | 102 |     |
| 1.0577   | 6.740408 | 512.226 | 0.241459 | 5.450244 | -1.10248 | 0.621901 | 84  | 121 |
|          |          |         |          |          |          |          | 113 | 113 |
|          |          |         |          |          |          |          | 116 |     |
| 1.314434 | 30.68626 | 445.701 | 0.475199 | 12.29732 | -2.13158 | -0.38395 | 75  | 106 |
| 0.286874 | 6.737368 | 498.174 | 0.251572 | 4.528751 | 0.352529 | 0.694527 | 104 | 100 |
|          |          |         |          |          |          |          | 65  | 31  |
|          |          |         |          |          |          |          | 110 | 116 |
|          |          |         |          |          |          |          | 91  |     |
| 1.493951 | 10.8101  | 253.408 | 0.270388 | 5.056066 | -1.45621 | 0.161374 | 115 | 121 |
| 0.154585 | 5.864271 | 671.593 | 0.336065 | 7.207362 | 0.719155 | 0.41082  | 91  | 90  |
| 1.043147 | 7.288336 | 277.082 | 0.762231 | 6.443783 | -0.91617 | -0.56758 | 83  | 88  |
| 0.659263 | 10.77405 | 420.424 | 0.246518 | 7.464085 | -0.81449 | 0.290784 | 69  | 106 |
|          |          |         |          |          |          |          | 101 | 110 |
| 1.241382 | 17.63949 | 111.058 | 0.563338 | 9.75137  | -2.23508 | -1.18587 | 112 | 119 |
|          |          |         |          |          |          |          | 113 | 103 |
| 0.746842 | 13.79287 | 396.411 | 0.238756 | 8.387745 | -1.5544  | 0.201971 | 80  | 99  |
| 0.30969  | 3.393489 | 344.337 | 0.231193 | 7.646523 | 0.474933 | 0.192005 | 120 | 105 |
| 2.124282 | 16.80802 | 146.047 | 1.076933 | 11.25125 | -2.46879 | -1.49339 | 98  | 109 |
|          |          |         |          |          |          |          | 87  | 114 |
| 0.458579 | 12.08733 | 323.067 | 0.289642 | 9.467466 | -0.90265 | -0.11778 | 105 |     |
| 0.138716 | 4.03544  | 463.752 | 0.150004 | 4.744486 | 0.997722 | 0.944262 | 46  | 124 |
|          |          |         |          |          |          |          | 107 |     |
| 1.351368 | 15.15958 | 242.551 | 0.342349 | 8.458227 | -1.52366 | -0.32673 | 105 | 121 |
| 0.467449 | 2.159891 | 238.966 | 0.700229 | 5.105358 | 0.349919 | -0.46437 | 67  | 108 |
|          |          |         |          |          |          |          | 98  |     |
| 0.187795 | 5.138656 | 385.554 | 0.156604 | 4.230674 | 0.465303 | 0.873342 | 79  | 107 |
| 0.30428  | 4.653272 | 271.378 | 0.265817 | 3.77031  | 0.170039 | 0.396107 | 55  | 95  |
| 0.384671 | 13.84487 |         |          |          | -1.16021 | 0.072455 | 92  |     |
| 0.208222 | 4.812499 | 161.377 | 0.116672 | 2.869679 | 0.067143 | 0.755394 | 71  | 109 |
| 0.962901 | 18.78785 | 209.649 | 0.422496 | 9.261284 | -1.74739 | -0.59887 | 68  | 104 |

|          |          |         |          |          |          |          |     |     |
|----------|----------|---------|----------|----------|----------|----------|-----|-----|
|          |          |         |          |          |          |          | 51  | 63  |
| 1.571685 | 13.39078 |         |          |          | -1.75335 | -1.34027 | 123 |     |
|          |          |         |          |          |          |          | 93  | 103 |
|          |          |         |          |          |          |          | 112 |     |
|          |          |         |          |          |          |          | 58  |     |
|          |          |         |          |          |          |          | 64  |     |
|          |          |         |          |          |          |          | 98  | 104 |
|          |          |         |          |          |          |          | 82  |     |
| 0.908366 | 11.0253  | 64.392  | 1.228213 | 10.21258 | -2.03099 | -1.99424 | 66  | 102 |
| 0.366982 | 14.17128 | 226.047 | 0.243563 | 10.10312 | -0.7568  | -0.2703  | 110 | 110 |
|          |          |         |          |          |          |          | 94  |     |
|          |          |         |          |          |          |          | 96  | 99  |
|          |          |         |          |          |          |          | 95  | 122 |
| 0.119399 | 4.234678 | 537.031 | 0.158412 | 5.144498 | 0.735945 | 0.951308 | 118 |     |
|          |          |         |          |          |          |          | 127 |     |
|          |          |         |          |          |          |          | 126 |     |
|          |          |         |          |          |          |          | 111 | 124 |
| 0.662552 | 10.42686 | 183.882 | 0.243049 | 7.815236 | -0.90488 | -0.23821 | 126 | 117 |
| 0.639518 | 7.749768 | 353.732 | 0.238223 | 3.505962 | -0.40878 |          | 101 | 120 |
| 1.390081 | 8.674273 | 235.705 | 0.469741 | 6.302061 | -1.42064 | -0.35771 | 102 | 116 |
|          |          |         |          |          |          |          | 100 |     |
| 0.530936 | 24.85467 | 289.903 | 0.350553 | 12.34151 | -1.68991 | -0.46288 | 102 | 108 |
| 0.226028 | 2.804894 | 120.844 | 0.815562 | 8.235971 | 0.830795 | -1.25549 | 78  | 96  |
| 1.43757  | 42.03847 | 171.187 | 2.910464 | 9.751986 | -2.88736 | -1.90034 | 110 | 112 |
| 1.160902 | 9.646035 | 364.899 | 0.337759 | 5.650026 | -1.20941 | 0.180575 | 115 | 116 |
| 0.335896 | 10.08065 | 142.355 | 0.864377 | 6.1384   | -0.9201  | -1.01642 | 99  | 114 |
| 0.531911 | 13.60512 | 403.018 | 0.395586 | 6.269344 | -0.90917 | 0.080129 | 74  | 106 |
|          |          |         |          |          |          |          | 86  | 110 |
| 0.594582 | 13.90774 | 368.898 | 0.335799 | 7.93059  | -0.98935 | -0.01824 | 107 | 98  |
| 0.208085 | 7.615282 | 501.823 | 0.409818 | 9.761273 | 0.552943 | -0.07922 | 87  | 113 |
|          |          |         |          |          |          |          | 105 |     |
| 0.267952 | 5.102222 | 436.719 | 0.269158 | 4.215264 | 0.173153 | 0.614963 | 104 | 79  |
| 0.207348 | 3.990407 | 351.228 | 0.223017 | 3.976279 | 0.677959 | 0.632778 | 112 | 122 |
| 0.322351 | 13.34835 |         |          |          | -0.68665 | 0.267519 | 97  |     |
|          |          |         |          |          |          |          | 91  |     |
| 0.822458 | 6.128658 | 256.936 | 0.553811 | 5.730148 | -0.29345 | -0.34749 | 113 | 84  |
| 0.181386 | 7.114823 | 284.72  | 0.24503  | 6.151817 | 0.149354 | 0.173005 | 109 | 100 |



| anaemia_a | anaemia_e | hb_cat_ad   | hb_cat_ex  | SFAI_adm | SFAI_exit | sTfRAI_adr | sTfRAI_exi | ID_adm |
|-----------|-----------|-------------|------------|----------|-----------|------------|------------|--------|
| Yes       | Yes       | Hb_adm<1    | Hb_exit<1: | 52.22728 | 52.22728  | 5.554462   | 5.554462   | No     |
| No        | No        | Hb_adm>=    | Hb_exit<1: | 18.76222 | 18.76222  | 9.237684   | 9.237684   | No     |
| No        |           | Hb_adm>=110 |            | 12.50235 | 12.50235  | 10.74024   | 10.74024   | No     |
| No        | No        | Hb_adm>=    | Hb_exit<1: | 30.196   | 30.196    | 9.056914   | 9.056914   | No     |
| Yes       | Yes       | Hb_adm<1    | Hb_exit<1: | 8.9657   | 8.9657    | 12.26895   | 12.26895   | Yes    |
| Yes       |           | Hb_adm<110  |            |          |           |            |            |        |
| Yes       | Yes       | Hb_adm<1    | Hb_exit<1: | 13.26715 | 13.26715  | 4.91421    | 4.91421    | No     |
| Yes       | Yes       | Hb_adm<1    | Hb_exit<1: | 12.08211 | 12.08211  | 39.68294   | 39.68294   | No     |
| No        |           | Hb_adm>=110 |            | 8.680145 |           | 8.038543   |            | Yes    |
| Yes       |           | Hb_adm<110  |            | 1.57032  | 1.57032   | 16.09603   | 16.09603   | Yes    |
| Yes       | Yes       | Hb_adm<1    | Hb_exit<1: | 41.3251  | 41.3251   | 4.484792   | 4.484792   | No     |
| Yes       |           | Hb_adm<110  |            | 6.487833 | 6.487833  | 9.9158     | 9.9158     | Yes    |
| Yes       | No        | Hb_adm<1    | Hb_exit<1: | 10.80422 | 3.665112  | 6.395438   | 10.93759   | Yes    |
| Yes       | Yes       | Hb_adm<1    | Hb_exit<1: | 54.38659 | 84.13298  | 15.25303   | 2.672641   | No     |
| No        | No        | Hb_adm>=    | Hb_exit<1: | 43.20545 | 43.20545  | 6.27736    | 6.27736    | No     |
| Yes       | Yes       | Hb_adm<1    | Hb_exit<1: | 5.155142 | 5.155142  | 13.16716   | 13.16716   | Yes    |
| No        |           | Hb_adm>=110 |            | 51.93679 | 51.93679  | 6.350133   | 6.350133   | No     |
| No        | No        | Hb_adm>=    | Hb_exit<1: | 17.64683 | 17.64683  | 6.681858   | 6.681858   | No     |
| No        |           | Hb_adm>=110 |            | 23.01311 | 23.01311  | 5.456139   | 5.456139   | No     |
| Yes       | Yes       | Hb_adm<1    | Hb_exit<1: | 4.083048 | 1.499876  | 8.23699    | 5.445122   | Yes    |
| Yes       | Yes       | Hb_adm<1    | Hb_exit<1: | 39.22769 | 39.22769  | 18.38544   | 18.38544   | No     |
| Yes       | Yes       | Hb_adm<1    | Hb_exit<1: | 49.6096  | 49.6096   | 4.928461   | 4.928461   | No     |
| Yes       | No        | Hb_adm<1    | Hb_exit<1: | 7.143939 | 7.143939  | 5.873792   | 5.873792   | Yes    |
| Yes       |           | Hb_adm<110  |            |          |           |            |            |        |
| Yes       |           | Hb_adm<110  |            | 19.81392 | 19.81392  | 5.101151   | 5.101151   | No     |
| Yes       | Yes       | Hb_adm<1    | Hb_exit<1: | 98.01836 | 98.01836  | 13.2031    | 13.2031    | No     |
| Yes       | Yes       | Hb_adm<1    | Hb_exit<1: | 45.28687 | 45.28687  | 15.58146   | 15.58146   | No     |
| Yes       | Yes       | Hb_adm<1    | Hb_exit<1: | 6.982912 | 6.982912  | 25.70184   | 25.70184   | Yes    |
| Yes       | Yes       | Hb_adm<1    | Hb_exit<1: | 0.372967 | 3.927735  | 29.10639   | 6.792043   | Yes    |
| No        | Yes       | Hb_adm>=    | Hb_exit<1: | 23.66484 | 23.66484  | 4.673318   | 4.673318   | No     |
| Yes       | No        | Hb_adm<1    | Hb_exit<1: | 10.09547 | 10.09547  | 9.300396   | 9.300396   | Yes    |
| Yes       |           | Hb_adm<110  |            | 7.494846 | 7.494846  | 9.269552   | 9.269552   | Yes    |
| No        | No        | Hb_adm>=    | Hb_exit<1: | 19.08053 | 19.08053  | 5.610407   | 5.610407   | No     |
| No        | No        | Hb_adm>=    | Hb_exit<1: | 7.084909 | 7.084909  | 6.876646   | 6.876646   | Yes    |
| Yes       | No        | Hb_adm<1    | Hb_exit<1: | 13.52357 | 13.52357  | 9.061215   | 9.061215   | No     |
| No        | No        | Hb_adm>=    | Hb_exit<1: | 40.19474 | 40.19474  | 4.601352   | 4.601352   | No     |
| No        | No        | Hb_adm>=    | Hb_exit<1: | 7.186906 | 6.426235  | 8.450385   | 11.30873   | Yes    |
| No        | Yes       | Hb_adm>=    | Hb_exit<1: | 35.175   | 15.28568  | 6.345      | 5.832119   | No     |
| Yes       | Yes       | Hb_adm<1    | Hb_exit<1: | 14.77241 | 101.5292  | 12.45872   | 4.450588   | No     |
| Yes       | No        | Hb_adm<1    | Hb_exit<1: | 7.218545 | 7.218545  | 6.023703   | 6.023703   | Yes    |
| Yes       | Yes       | Hb_adm<1    | Hb_exit<1: | 3.797865 | 3.797865  | 13.10108   | 13.10108   | Yes    |
| Yes       | Yes       | Hb_adm<1    | Hb_exit<1: | 1.310407 | 1.310407  | 13.66633   | 13.66633   | Yes    |
| Yes       |           | Hb_adm<110  |            | 11.70173 | 11.70173  | 9.264328   | 9.264328   | Yes    |
| Yes       |           | Hb_adm<110  |            | 8.146289 | 8.146289  | 6.505944   | 6.505944   | Yes    |
| Yes       | No        | Hb_adm<1    | Hb_exit<1: | 36.06109 | 36.06109  | 1.621449   | 1.621449   | No     |
| Yes       | No        | Hb_adm<1    | Hb_exit<1: | 45.94252 | 26.7836   | 6.742353   | 10.81686   | No     |
| No        |           | Hb_adm>=110 |            | 24.645   | 24.645    | 5.928038   | 5.928038   | No     |
| Yes       | No        | Hb_adm<1    | Hb_exit<1: | 34.56753 | 39.21371  | 5.249384   | 10.14191   | No     |
| No        | No        | Hb_adm>=    | Hb_exit<1: | 16.5111  | 16.5111   | 8.094405   | 8.094405   | No     |
| Yes       | No        | Hb_adm<1    | Hb_exit<1: | 33.06088 | 33.06088  | 5.107193   | 5.107193   | No     |

|     |     |                      |          |          |          |          |     |
|-----|-----|----------------------|----------|----------|----------|----------|-----|
| Yes | Yes | Hb_adm<1 Hb_exit<1:  | 134.9544 | 134.9544 | 7.817788 | 7.817788 | No  |
| Yes | Yes | Hb_adm<1 Hb_exit<1:  | 9.427966 | 9.427966 | 13.71339 | 13.71339 | Yes |
| Yes | Yes | Hb_adm<1 Hb_exit<1:  | 11.03622 | 11.03622 | 26.57862 | 26.57862 | Yes |
| Yes | Yes | Hb_adm<1 Hb_exit<1:  | 17.53679 | 17.53679 | 7.385091 | 7.385091 | No  |
| Yes | No  | Hb_adm<1 Hb_exit<1:  | 9.556003 | 9.556003 | 7.768468 | 7.768468 | Yes |
| Yes | No  | Hb_adm<1 Hb_exit<1:  | 10.05709 | 67.23848 | 9.354885 | 2.069413 | Yes |
| Yes | Yes | Hb_adm<1 Hb_exit<1:  | 23.5647  | 23.5647  | 18.79966 | 18.79966 | No  |
| No  |     | Hb_adm>=110          | 43.0965  | 43.0965  | 5.763716 | 5.763716 | No  |
| Yes | Yes | Hb_adm<1 Hb_exit<1:  | 5.105331 | 5.105331 | 10.60623 | 10.60623 | Yes |
| Yes |     | Hb_adm<110           |          |          |          |          |     |
| Yes | Yes | Hb_adm<1 Hb_exit<1:  | 5.336765 | 5.336765 | 14.79621 | 14.79621 | Yes |
| No  | No  | Hb_adm>= Hb_exit<1:  | 40.01822 | 40.01822 | 5.150105 | 5.150105 | No  |
| Yes | Yes | Hb_adm<1 Hb_exit<1:  | 31.5488  | 31.5488  | 29.53987 | 29.53987 | No  |
| Yes | No  | Hb_adm<1 Hb_exit<1:  | 17.56712 | 10.6328  | 10.74835 | 14.90284 | No  |
| Yes |     | Hb_adm<110           | 3.974777 | 3.974777 | 9.274343 | 9.274343 | Yes |
| Yes | No  | Hb_adm<1 Hb_exit<1:  | 2.748792 | 2.748792 | 13.55142 | 13.55142 | Yes |
| Yes | Yes | Hb_adm<1 Hb_exit<1:  | 2.395191 | 2.395191 | 9.496624 | 9.496624 | Yes |
| Yes |     | Hb_adm<110           | 10.27613 | 10.27613 | 7.259402 | 7.259402 | Yes |
| No  | No  | Hb_adm>= Hb_exit<1:  | 7.185784 | 7.185784 | 6.090583 | 6.090583 | Yes |
| Yes | Yes | Hb_adm<1 Hb_exit<1:  | 4.929633 | 29.5501  | 16.48013 | 8.134992 | Yes |
| No  | No  | Hb_adm>= Hb_exit<1:  | 48.99269 | 48.99269 | 5.783182 | 5.783182 | No  |
| Yes | Yes | Hb_adm<1 Hb_exit<1:  | 23.55    | 23.55    | 7.13     | 7.13     | No  |
| Yes | Yes | Hb_adm<1 Hb_exit<1:  | 6.325202 | 6.325202 | 8.348016 | 8.348016 | Yes |
| Yes | No  | Hb_adm<1 Hb_exit<1:  | 36.02286 | 36.02286 | 6.08235  | 6.08235  | No  |
| No  | No  | Hb_adm>= Hb_exit<1:  | 14.30836 | 14.30836 | 7.739808 | 7.739808 | No  |
| No  |     | Hb_adm>=110          | 5.145    | 5.145    | 9.19     | 9.19     | Yes |
| Yes | No  | Hb_adm<1 Hb_exit<1:  | 26.38    | 26.38    | 8.97     | 8.97     | No  |
| Yes |     | Hb_adm<110           | 67.60448 | 67.60448 | 24.91396 | 24.91396 | No  |
| Yes | Yes | Hb_adm<1 Hb_exit<1:  | 7.913492 | 7.913492 | 18.98458 | 18.98458 | Yes |
| No  | No  | Hb_adm>= Hb_exit<1:  | 18.8988  | 18.8988  | 7.186841 | 7.186841 | No  |
| Yes |     | Hb_adm<110           | 4.217543 |          | 24.62792 |          | Yes |
| No  | No  | Hb_adm>= Hb_exit<110 |          |          |          |          |     |
| Yes | Yes | Hb_adm<1 Hb_exit<1:  | 4.288889 | 4.288889 | 13.49235 | 13.49235 | Yes |
| Yes |     | Hb_adm<110           |          |          |          |          |     |
| No  |     | Hb_adm>=110          | 17.615   | 17.615   | 9.625    | 9.625    | No  |
| Yes |     | Hb_adm<110           | 3.057754 | 3.057754 | 34.18574 | 34.18574 | Yes |
| No  |     | Hb_adm>=110          | 10.75248 | 10.75248 | 6.562413 | 6.562413 | Yes |
| Yes |     | Hb_adm<110           | 40.19892 | 40.19892 | 7.850294 | 7.850294 | No  |
| Yes | Yes | Hb_adm<1 Hb_exit<1:  | 12.58248 | 12.58248 | 10.93567 | 10.93567 | No  |
| Yes |     | Hb_adm<110           | 47.02598 | 47.02598 | 4.251713 | 4.251713 | No  |
| Yes |     | Hb_adm<110           | 3.517598 | 3.517598 | 31.01984 | 31.01984 | Yes |
| Yes | Yes | Hb_adm<1 Hb_exit<1:  | 0.762303 | 4.950089 | 16.53022 | 10.63218 | Yes |
| Yes | No  | Hb_adm<1 Hb_exit<1:  | 14.5     | 9.255991 | 6.105    | 10.07565 | No  |
| Yes |     | Hb_adm<110           | 8.978599 |          | 14.45866 |          | Yes |
| Yes | Yes | Hb_adm<1 Hb_exit<1:  | 10.14204 | 11.65535 | 7.435881 | 9.780898 | Yes |
| No  | No  | Hb_adm>= Hb_exit<1:  | 14.14788 | 14.14788 | 6.361514 | 6.361514 | No  |
| Yes |     | Hb_adm<110           | 2.318313 | 2.318313 | 22.61248 | 22.61248 | Yes |
| Yes | No  | Hb_adm<1 Hb_exit<1:  | 2.406536 | 2.406536 | 11.91026 | 11.91026 | Yes |
| Yes |     | Hb_adm<110           | 5.406145 | 5.406145 | 19.17861 | 19.17861 | Yes |
| Yes |     | Hb_adm<110           | 47.13666 | 47.13666 | 5.989016 | 5.989016 | No  |
| Yes | No  | Hb_adm<1 Hb_exit<1:  | 16.83869 | 16.83869 | 6.365399 | 6.365399 | No  |

|     |     |                     |          |          |          |          |     |
|-----|-----|---------------------|----------|----------|----------|----------|-----|
| Yes | Yes | Hb_adm<1Hb_exit<110 |          |          |          |          |     |
| Yes | No  | Hb_adm<1Hb_exit<1:  | 9.22378  | 9.22378  | 6.076991 | 6.076991 | Yes |
| Yes | Yes | Hb_adm<1Hb_exit<1:  | 7.607156 | 7.607156 | 9.06837  | 9.06837  | Yes |
| Yes | No  | Hb_adm<1Hb_exit<110 |          |          |          |          |     |
| Yes | Yes | Hb_adm<1Hb_exit<1:  | 54.01048 | 54.01048 | 13.01023 | 13.01023 | No  |
| No  |     | Hb_adm>=110         | 16.3874  | 16.3874  | 9.38204  | 9.38204  | No  |
| Yes | Yes | Hb_adm<1Hb_exit<1:  | 4.345182 | 4.345182 | 13.19933 | 13.19933 | Yes |
| No  | No  | Hb_adm>= Hb_exit<1: | 11.12317 | 11.12317 | 6.042094 | 6.042094 | Yes |
| Yes | No  | Hb_adm<1Hb_exit<1:  | 11.13    | 11.13    | 8.26     | 8.26     | Yes |
| Yes |     | Hb_adm<110          | 18.02    | 3.151749 | 8.53     | 11.46536 | No  |
| No  | Yes | Hb_adm>= Hb_exit<1: | 16.58    | 16.58    | 5.78     | 5.78     | No  |
| Yes | Yes | Hb_adm<1Hb_exit<1:  | 9.749607 | 9.749607 | 7.709252 | 7.709252 | Yes |
| Yes | Yes | Hb_adm<1Hb_exit<110 |          |          |          |          |     |
| No  |     | Hb_adm>=110         | 37.33341 | 37.33341 | 8.510354 | 8.510354 | No  |
| Yes |     | Hb_adm<110          | 5.709337 | 5.709337 | 12.21227 | 12.21227 | Yes |
| Yes |     | Hb_adm<110          | 5.548557 | 5.548557 | 7.306453 | 7.306453 | Yes |
| No  | Yes | Hb_adm>= Hb_exit<1: | 11.25641 | 11.25641 | 5.826751 | 5.826751 | Yes |
| No  | No  | Hb_adm>= Hb_exit<1: | 23.32927 | 23.32927 | 5.202404 | 5.202404 | No  |
| No  |     | Hb_adm>=110         | 45.76774 | 45.76774 | 4.348117 | 4.348117 | No  |
| Yes |     | Hb_adm<110          | 16.93967 | 16.93967 | 6.69109  | 6.69109  | No  |
| No  | Yes | Hb_adm>= Hb_exit<1: | 77.8943  | 46.06663 | 6.071292 | 6.422466 | No  |
| Yes | No  | Hb_adm<1Hb_exit<1:  | 9.048721 | 9.048721 | 10.55727 | 10.55727 | Yes |
| No  |     | Hb_adm>=110         | 52.48531 | 52.48531 | 5.111928 | 5.111928 | No  |
| Yes | Yes | Hb_adm<1Hb_exit<110 |          |          |          |          |     |
| Yes | No  | Hb_adm<1Hb_exit<1:  | 25.55593 | 25.55593 | 4.855497 | 4.855497 | No  |
| Yes | No  | Hb_adm<1Hb_exit<1:  | 12.04285 | 12.04285 | 10.77106 | 10.77106 | No  |
| Yes |     | Hb_adm<110          | 1.882295 | 1.882295 | 29.22732 | 29.22732 | Yes |
| No  |     | Hb_adm>=110         | 14.46788 | 14.46788 | 5.236244 | 5.236244 | No  |
| No  | Yes | Hb_adm>= Hb_exit<1: | 14.00343 | 14.00343 | 6.459575 | 6.459575 | No  |
| Yes | Yes | Hb_adm<1Hb_exit<1:  | 12.32034 | 40.50609 | 5.029106 | 2.834232 | No  |
| Yes | Yes | Hb_adm<1Hb_exit<1:  | 35.97665 | 35.97665 | 3.057822 | 3.057822 | No  |
| Yes | Yes | Hb_adm<1Hb_exit<1:  | 10.97799 | 10.97799 | 15.4576  | 15.4576  | Yes |
| Yes | Yes | Hb_adm<1Hb_exit<1:  | 21.42138 | 21.42138 | 7.514981 | 7.514981 | No  |
| Yes | No  | Hb_adm<1Hb_exit<1:  | 2.323727 | 2.323727 | 8.496919 | 8.496919 | Yes |
| Yes | Yes | Hb_adm<1Hb_exit<1:  | 6.097963 | 6.097963 | 5.98646  | 5.98646  | Yes |
| Yes | Yes | Hb_adm<1Hb_exit<1:  | 12.84135 | 12.84135 | 15.73201 | 15.73201 | No  |
| Yes | No  | Hb_adm<1Hb_exit<1:  | 32.0101  | 32.0101  | 6.989929 | 6.989929 | No  |
| No  |     | Hb_adm>=110         | 25.61836 | 25.61836 | 5.128472 | 5.128472 | No  |
| No  | No  | Hb_adm>= Hb_exit<1: | 5.094705 | 5.094705 | 6.428717 | 6.428717 | Yes |
| Yes |     | Hb_adm<110          | 7.513431 | 7.513431 | 9.10042  | 9.10042  | Yes |
| Yes | Yes | Hb_adm<1Hb_exit<1:  | 28.30087 | 28.30087 | 7.583384 | 7.583384 | No  |
| Yes | No  | Hb_adm<1Hb_exit<1:  | 14.04985 | 14.04985 | 8.511057 | 8.511057 | No  |
| No  | Yes | Hb_adm>= Hb_exit<1: | 36.66477 | 36.66477 | 3.576324 | 3.576324 | No  |
| Yes |     | Hb_adm<110          | 5.610872 | 5.610872 | 8.584583 | 8.584583 | Yes |
| Yes |     | Hb_adm<110          | 21.92443 | 21.92443 | 6.82724  | 6.82724  | No  |
| Yes | No  | Hb_adm<1Hb_exit<1:  | 72.26475 | 72.26475 | 19.13235 | 19.13235 | No  |
| No  | No  | Hb_adm>= Hb_exit<1: | 24.38776 | 24.38776 | 11.15942 | 11.15942 | No  |
| Yes | Yes | Hb_adm<1Hb_exit<1:  | 13.38712 | 13.38712 | 5.218962 | 5.218962 | No  |
| Yes | Yes | Hb_adm<1Hb_exit<1:  | 2.884552 | 2.884552 | 17.78116 | 17.78116 | Yes |
| Yes |     | Hb_adm<110          | 53.68381 | 53.68381 | 6.889684 | 6.889684 | No  |
| Yes | Yes | Hb_adm<1Hb_exit<110 |          |          |          |          |     |

|     |     |                      |          |          |          |          |     |
|-----|-----|----------------------|----------|----------|----------|----------|-----|
| Yes | Yes | Hb_adm<1Hb_exit<1:   | 73.32078 | 73.32078 | 10.78197 | 10.78197 | No  |
| Yes |     | Hb_adm<110           |          |          |          |          |     |
| Yes | No  | Hb_adm<1Hb_exit<110  |          |          |          |          |     |
| Yes |     | Hb_adm<110           | 20.32226 | 20.32226 | 14.1976  | 14.1976  | No  |
| Yes |     | Hb_adm<110           |          |          |          |          |     |
| Yes |     | Hb_adm<110           |          |          |          |          |     |
| Yes | Yes | Hb_adm<1Hb_exit<1:   | 6.229085 | 6.229085 | 23.60259 | 23.60259 | Yes |
| Yes | Yes | Hb_adm<1Hb_exit<1:   | 4.943566 | 4.943566 | 6.42233  | 6.42233  | Yes |
| Yes | No  | Hb_adm<1Hb_exit<1:   | 16.64328 | 16.64328 | 7.60975  | 7.60975  | No  |
| No  | Yes | Hb_adm>= Hb_exit<110 |          |          |          |          |     |
| Yes | Yes | Hb_adm<1Hb_exit<1:   | 23.36776 | 23.36776 | 9.372984 | 9.372984 | No  |
| Yes |     | Hb_adm<110           | 5.850402 | 5.850402 | 18.07486 | 18.07486 | Yes |
| Yes |     | Hb_adm<110           | 40.761   | 40.761   | 5.989845 | 5.989845 | No  |
| Yes |     | Hb_adm<110           | 0.686291 | 0.686291 | 23.63489 | 23.63489 | Yes |
| Yes |     | Hb_adm<110           | 3.459589 | 3.459589 | 26.348   | 26.348   | Yes |
| Yes |     | Hb_adm<110           | 4.873563 | 4.873563 | 12.12863 | 12.12863 | Yes |
| Yes | No  | Hb_adm<1Hb_exit<1:   | 8.93     | 8.93     | 8.145    | 8.145    | Yes |
| No  | No  | Hb_adm>= Hb_exit<1:  | 22.805   | 30.51677 | 5.365    | 4.855693 | No  |
| Yes | Yes | Hb_adm<1Hb_exit<1:   | 15.66182 | 15.66182 | 10.59048 | 10.59048 | No  |
| Yes | No  | Hb_adm<1Hb_exit<1:   | 21.72028 | 21.72028 | 6.475754 | 6.475754 | No  |
| Yes | Yes | Hb_adm<1Hb_exit<1:   | 48.69935 | 48.69935 | 3.108992 | 3.108992 | No  |
| Yes | No  | Hb_adm<1Hb_exit<1:   | 58.78976 | 58.78976 | 6.94583  | 6.94583  | No  |
| Yes | No  | Hb_adm<1Hb_exit<1:   | 11.44211 | 11.44211 | 7.085487 | 7.085487 | Yes |
| Yes | Yes | Hb_adm<1Hb_exit<1:   | 15.83223 | 15.83223 | 8.329897 | 8.329897 | No  |
| Yes | No  | Hb_adm<1Hb_exit<1:   | 14.22679 | 14.22679 | 14.83596 | 14.83596 | No  |
| Yes | Yes | Hb_adm<1Hb_exit<1:   | 1.346527 | 1.346527 | 19.58783 | 19.58783 | Yes |
| Yes | Yes | Hb_adm<1Hb_exit<1:   | 17.91372 | 17.91372 | 7.051275 | 7.051275 | No  |
| Yes | Yes | Hb_adm<1Hb_exit<1:   | 1.069751 | 1.069751 | 17.93031 | 17.93031 | Yes |
| Yes |     | Hb_adm<110           | 29.86327 | 29.86327 | 5.19709  | 5.19709  | No  |
| No  |     | Hb_adm>=110          |          |          |          |          |     |
| Yes | No  | Hb_adm<1Hb_exit<1:   | 8.676991 | 8.676991 | 5.482123 | 5.482123 | Yes |
| Yes |     | Hb_adm<110           | 10.51281 | 10.51281 | 8.663511 | 8.663511 | Yes |
| No  | No  | Hb_adm>= Hb_exit<1:  | 39.64479 | 39.64479 | 6.684704 | 6.684704 | No  |
| Yes |     | Hb_adm<110           |          |          |          |          |     |
| Yes |     | Hb_adm<110           | 38.33413 | 38.33413 | 13.5445  | 13.5445  | No  |
| Yes | Yes | Hb_adm<1Hb_exit<1:   | 9.268842 | 9.268842 | 18.83807 | 18.83807 | Yes |
| Yes |     | Hb_adm<110           | 40.36144 | 40.36144 | 9.558571 | 9.558571 | No  |
| Yes | No  | Hb_adm<1Hb_exit<1:   | 41.71839 | 41.71839 | 12.4715  | 12.4715  | No  |
| Yes | Yes | Hb_adm<1Hb_exit<1:   | 23.85341 | 23.85341 | 9.549941 | 9.549941 | No  |
| Yes | Yes | Hb_adm<1Hb_exit<1:   | 14.06    | 14.06    | 8.49     | 8.49     | No  |
| Yes |     | Hb_adm<110           | 89.5702  | 89.5702  | 12.70942 | 12.70942 | No  |
| Yes | Yes | Hb_adm<1Hb_exit<1:   | 39.78082 | 39.78082 | 14.23124 | 14.23124 | No  |
| Yes | Yes | Hb_adm<1Hb_exit<1:   | 30.4899  | 30.4899  | 18.31945 | 18.31945 | No  |
| Yes |     | Hb_adm<110           | 33.94155 | 33.94155 | 8.110086 | 8.110086 | No  |
| Yes | Yes | Hb_adm<1Hb_exit<1:   | 11.36867 | 11.36867 | 8.73515  | 8.73515  | Yes |
| Yes |     | Hb_adm<110           | 1.300063 | 1.300063 | 38.00482 | 38.00482 | Yes |
| Yes | Yes | Hb_adm<1Hb_exit<1:   | 27.57266 | 27.57266 | 11.01305 | 11.01305 | No  |
| Yes |     | Hb_adm<110           | 47.44954 | 47.44954 | 11.78862 | 11.78862 | No  |
| Yes |     | Hb_adm<110           | 32.29922 | 32.29922 | 15.03155 | 15.03155 | No  |
| Yes | Yes | Hb_adm<1Hb_exit<1:   | 36.69532 | 36.69532 | 23.60466 | 23.60466 | No  |
| Yes |     | Hb_adm<110           | 76.47504 | 76.47504 | 7.014962 | 7.014962 | No  |

|     |     |                      |          |          |          |          |     |
|-----|-----|----------------------|----------|----------|----------|----------|-----|
| Yes |     | Hb_adm<110           | 5.687269 | 5.687269 | 14.94789 | 14.94789 | Yes |
| Yes | Yes | Hb_adm<1 Hb_exit<1:  | 37.07941 | 37.07941 | 18.45426 | 18.45426 | No  |
| Yes |     | Hb_adm<110           | 52.06278 | 52.06278 | 6.018726 | 6.018726 | No  |
| Yes |     | Hb_adm<110           | 36.89481 | 36.89481 | 9.883712 | 9.883712 | No  |
| Yes |     | Hb_adm<110           | 15.88392 | 6.998407 | 4.478805 | 14.64033 | No  |
| Yes |     | Hb_adm<110           | 8.15042  | 8.15042  | 5.515492 | 5.515492 | Yes |
| No  | No  | Hb_adm>= Hb_exit<1:  | 15.79011 | 15.79011 | 6.589789 | 6.589789 | No  |
| Yes | Yes | Hb_adm<1 Hb_exit<110 |          |          |          |          |     |
| Yes | Yes | Hb_adm<1 Hb_exit<1:  | 6.38277  | 6.38277  | 7.31752  | 7.31752  | Yes |
| Yes | Yes | Hb_adm<1 Hb_exit<1:  | 37.18424 | 37.18424 | 4.893558 | 4.893558 | No  |
| Yes | Yes | Hb_adm<1 Hb_exit<1:  | 38.08422 | 38.08422 | 10.24849 | 10.24849 | No  |
| Yes | No  | Hb_adm<1 Hb_exit<110 |          |          |          |          |     |
| Yes | Yes | Hb_adm<1 Hb_exit<1:  | 22.01375 | 22.01375 | 5.088388 | 5.088388 | No  |
| Yes | Yes | Hb_adm<1 Hb_exit<110 |          |          |          |          |     |
| Yes | No  | Hb_adm<1 Hb_exit<1:  | 77.42505 | 77.42505 | 9.795056 | 9.795056 | No  |
| Yes | Yes | Hb_adm<1 Hb_exit<1:  | 7.245989 | 7.245989 | 7.893439 | 7.893439 | Yes |
| Yes | No  | Hb_adm<1 Hb_exit<1:  | 33.13098 | 13.97972 | 16.8501  | 8.08496  | No  |
| Yes | Yes | Hb_adm<1 Hb_exit<1:  | 12.45202 | 12.45202 | 8.078341 | 8.078341 | No  |
| Yes |     | Hb_adm<110           |          |          |          |          |     |
| Yes | No  | Hb_adm<1 Hb_exit<1:  | 3.02844  | 3.02844  | 15.24419 | 15.24419 | Yes |
| Yes |     | Hb_adm<110           | 12.86523 | 12.86523 | 6.648743 | 6.648743 | No  |
| Yes |     | Hb_adm<110           |          |          |          |          |     |
| Yes | Yes | Hb_adm<1 Hb_exit<1:  | 1.814691 | 1.814691 | 18.43059 | 18.43059 | Yes |
| Yes | No  | Hb_adm<1 Hb_exit<110 |          |          |          |          |     |
| Yes | Yes | Hb_adm<1 Hb_exit<1:  | 16.38586 | 16.38586 | 10.07182 | 10.07182 | No  |
| Yes |     | Hb_adm<110           | 5.759342 | 5.759342 | 20.91162 | 20.91162 | Yes |
| Yes | No  | Hb_adm<1 Hb_exit<1:  | 23.09678 | 23.09678 | 3.751468 | 3.751468 | No  |
| No  |     | Hb_adm>=110          | 15.98129 | 15.98129 | 5.619037 | 5.619037 | No  |
| Yes | No  | Hb_adm<1 Hb_exit<1:  | 52.82881 | 52.82881 | 5.167782 | 5.167782 | No  |
| Yes | No  | Hb_adm<1 Hb_exit<1:  | 2.343926 | 16.31672 | 33.71524 | 7.787278 | Yes |
| Yes |     | Hb_adm<110           | 13.11755 | 13.11755 | 9.070537 | 9.070537 | No  |
| Yes | Yes | Hb_adm<1 Hb_exit<1:  | 18.14044 | 18.14044 | 6.001201 | 6.001201 | No  |
| Yes | No  | Hb_adm<1 Hb_exit<1:  | 9.694844 | 9.694844 | 8.054209 | 8.054209 | Yes |
| Yes | Yes | Hb_adm<1 Hb_exit<1:  | 29.48477 | 29.48477 | 5.958129 | 5.958129 | No  |
| Yes | Yes | Hb_adm<1 Hb_exit<1:  | 46.92273 | 56.61038 | 17.44679 | 19.18335 | No  |
| Yes |     | Hb_adm<110           |          |          |          |          |     |
| Yes | No  | Hb_adm<1 Hb_exit<1:  | 3.268648 | 3.268648 | 12.04393 | 12.04393 | Yes |
| Yes | No  | Hb_adm<1 Hb_exit<1:  | 45.59022 | 45.59022 | 7.158941 | 7.158941 | No  |
| No  | Yes | Hb_adm>= Hb_exit<1:  | 22.30906 | 22.30906 | 6.428234 | 6.428234 | No  |
| No  |     | Hb_adm>=110          | 11.88654 | 11.88654 | 9.043991 | 9.043991 | Yes |
| Yes | Yes | Hb_adm<1 Hb_exit<1:  | 55.80855 | 55.80855 | 6.227394 | 6.227394 | No  |
| Yes | Yes | Hb_adm<1 Hb_exit<1:  | 9.72085  | 9.72085  | 5.361188 | 5.361188 | Yes |
| Yes | No  | Hb_adm<1 Hb_exit<1:  | 3.572924 | 3.572924 | 16.95052 | 16.95052 | Yes |
| No  |     | Hb_adm>=110          | 18.90922 | 18.90922 | 5.316906 | 5.316906 | No  |
| Yes |     | Hb_adm<110           | 21.41124 | 21.41124 | 7.551528 | 7.551528 | No  |
| Yes |     | Hb_adm<110           | 2.907346 |          | 12.94522 |          | Yes |
| Yes | No  | Hb_adm<1 Hb_exit<1:  | 62.68419 | 62.68419 | 7.94027  | 7.94027  | No  |
| No  | No  | Hb_adm>= Hb_exit<1:  | 4.23617  | 4.23617  | 12.19709 | 12.19709 | Yes |
| Yes | Yes | Hb_adm<1 Hb_exit<1:  | 36.08276 | 36.08276 | 9.734613 | 9.734613 | No  |
| Yes | Yes | Hb_adm<1 Hb_exit<1:  | 2.757733 | 2.757733 | 23.96451 | 23.96451 | Yes |
| No  | No  | Hb_adm>= Hb_exit<1:  | 18.12351 | 18.12351 | 5.684165 | 5.684165 | No  |

|     |     |                     |          |          |          |          |     |
|-----|-----|---------------------|----------|----------|----------|----------|-----|
| Yes |     | Hb_adm<110          |          |          |          |          |     |
| Yes | Yes | Hb_adm<1 Hb_exit<1: | 15.60551 | 17.29304 | 6.200048 | 7.292017 | No  |
| Yes |     | Hb_adm<110          | 28.5245  | 28.5245  | 6.413899 | 6.413899 | No  |
| Yes | Yes | Hb_adm<1 Hb_exit<1: | 2.929918 | 2.929918 | 13.81771 | 13.81771 | Yes |
| Yes |     | Hb_adm<110          | 5.50279  | 5.50279  | 9.000676 | 9.000676 | Yes |
| No  |     | Hb_adm>=110         | 8.258509 | 8.258509 | 6.89145  | 6.89145  | Yes |
| Yes | Yes | Hb_adm<1 Hb_exit<1: | 3.799683 | 3.799683 | 6.466385 | 6.466385 | Yes |
| Yes | No  | Hb_adm<1 Hb_exit<1: | 12.72441 | 31.22022 | 11.40932 | 4.590272 | No  |
| Yes |     | Hb_adm<110          | 10.15    | 10.15    | 9.925    | 9.925    | Yes |
| Yes | Yes | Hb_adm<1 Hb_exit<1: | 9.544504 | 9.544504 | 11.37775 | 11.37775 | Yes |
| Yes | Yes | Hb_adm<1 Hb_exit<1: | 6.898118 | 6.898118 | 6.661369 | 6.661369 | Yes |
| Yes | No  | Hb_adm<1 Hb_exit<1: | 7.192407 | 7.192407 | 11.33083 | 11.33083 | Yes |
| Yes | Yes | Hb_adm<1 Hb_exit<1: | 7.56458  | 7.56458  | 10.88737 | 10.88737 | Yes |
| Yes | Yes | Hb_adm<1 Hb_exit<1: | 63.56378 | 63.56378 | 6.635651 | 6.635651 | No  |
| Yes | No  | Hb_adm<1 Hb_exit<1: | 40.38698 | 40.38698 | 6.877063 | 6.877063 | No  |
| Yes | Yes | Hb_adm<1 Hb_exit<1: | 10.66224 | 10.66224 | 6.996707 | 6.996707 | Yes |
| Yes | Yes | Hb_adm<1 Hb_exit<1: | 25.61656 | 25.61656 | 7.544404 | 7.544404 | No  |
| Yes |     | Hb_adm<110          | 29.68671 | 29.68671 | 14.28952 | 14.28952 | No  |
| Yes | Yes | Hb_adm<1 Hb_exit<1: | 2.846589 | 2.846589 | 7.412137 | 7.412137 | Yes |
| Yes | Yes | Hb_adm<1 Hb_exit<1: | 25.83179 | 24.81943 | 8.703975 | 13.44866 | No  |
| Yes | Yes | Hb_adm<1 Hb_exit<1: | 19.55729 | 19.55729 | 4.679483 | 4.679483 | No  |
| Yes | Yes | Hb_adm<1 Hb_exit<1: | 67.27631 | 67.27631 | 6.35493  | 6.35493  | No  |
| Yes | Yes | Hb_adm<1 Hb_exit<1: | 21.96263 | 21.96263 | 5.07135  | 5.07135  | No  |
| Yes | No  | Hb_adm<1 Hb_exit<1: | 8.734038 | 8.734038 | 11.60359 | 11.60359 | Yes |
| Yes |     | Hb_adm<110          | 6.783385 | 6.783385 | 8.414738 | 8.414738 | Yes |
| No  | No  | Hb_adm>= Hb_exit<1: | 13.99904 | 13.99904 | 6.884331 | 6.884331 | No  |
| Yes | Yes | Hb_adm<1 Hb_exit<1: | 59.25413 | 59.25413 | 7.353113 | 7.353113 | No  |
| Yes | No  | Hb_adm<1 Hb_exit<1: | 39.88054 | 39.88054 | 9.778976 | 9.778976 | No  |
| Yes | Yes | Hb_adm<1 Hb_exit<1: | 131.3148 | 131.3148 | 13.21279 | 13.21279 | No  |
| Yes |     | Hb_adm<110          | 56.5753  | 56.5753  | 3.960511 | 3.960511 | No  |
| Yes | No  | Hb_adm<1 Hb_exit<1: | 10.88601 | 10.88601 | 6.218234 | 6.218234 | Yes |
| Yes | Yes | Hb_adm<1 Hb_exit<1: | 26.58088 | 54.07029 | 10.21478 | 17.13976 | No  |
| Yes | Yes | Hb_adm<1 Hb_exit<1: | 13.875   | 16.13763 | 12.13    | 19.77573 | No  |
| Yes |     | Hb_adm<110          | 34.16642 | 34.16642 | 9.121536 | 9.121536 | No  |
| Yes | No  | Hb_adm<1 Hb_exit<1: | 45.79836 | 45.79836 | 15.37128 | 15.37128 | No  |
| Yes | Yes | Hb_adm<1 Hb_exit<1: | 44.67689 | 44.67689 | 17.19816 | 17.19816 | No  |
| Yes | Yes | Hb_adm<1 Hb_exit<1: | 120.3014 | 120.3014 | 9.213929 | 9.213929 | No  |
| Yes | Yes | Hb_adm<1 Hb_exit<1: | 39.45728 | 39.45728 | 5.96339  | 5.96339  | No  |
| Yes |     | Hb_adm<110          |          |          |          |          |     |
| Yes | Yes | Hb_adm<1 Hb_exit<1: | 47.36367 | 47.36367 | 4.05362  | 4.05362  | No  |
| Yes | Yes | Hb_adm<1 Hb_exit<1: | 40.62204 | 12.08337 | 3.990657 | 12.71194 | No  |
| Yes | Yes | Hb_adm<1 Hb_exit<1: | 6.277224 | 6.277224 | 15.4526  | 15.4526  | Yes |
| Yes | No  | Hb_adm<1 Hb_exit<1: | 4.06229  | 4.06229  | 20.19216 | 20.19216 | Yes |
| Yes |     | Hb_adm<110          | 17.20276 | 17.20276 | 12.14774 | 12.14774 | No  |
| Yes | Yes | Hb_adm<1 Hb_exit<1: | 26.70267 | 26.70267 | 11.33774 | 11.33774 | No  |
| Yes | Yes | Hb_adm<1 Hb_exit<1: | 12.16294 | 12.16294 | 16.01091 | 16.01091 | No  |
| Yes | No  | Hb_adm<1 Hb_exit<1: | 6.590299 | 6.590299 | 8.827252 | 8.827252 | Yes |
| No  | No  | Hb_adm>= Hb_exit<1: | 12.06595 | 12.06595 | 7.352772 | 7.352772 | No  |
| Yes | No  | Hb_adm<1 Hb_exit<1: | 15.036   | 15.036   | 8.378413 | 8.378413 | No  |
| Yes | Yes | Hb_adm<1 Hb_exit<1: | 9.216748 | 9.216748 | 15.3339  | 15.3339  | Yes |
| Yes | Yes | Hb_adm<1 Hb_exit<1: | 11.59753 | 11.59753 | 9.282699 | 9.282699 | Yes |

|     |     |                      |          |          |          |          |     |
|-----|-----|----------------------|----------|----------|----------|----------|-----|
| Yes | Yes | Hb_adm<1 Hb_exit<1:  | 2.154463 | 2.154463 | 13.01504 | 13.01504 | Yes |
| Yes |     | Hb_adm<110           |          |          |          |          |     |
| Yes | Yes | Hb_adm<1 Hb_exit<1:  | 7.180042 | 7.180042 | 14.71863 | 14.71863 | Yes |
| No  |     | Hb_adm>=110          | 16.09123 | 16.09123 | 5.438533 | 5.438533 | No  |
| No  | No  | Hb_adm>= Hb_exit<1:  | 11.43818 | 11.43818 | 5.339667 | 5.339667 | Yes |
| Yes |     | Hb_adm<110           | 7.296079 | 7.296079 | 9.022989 | 9.022989 | Yes |
| Yes | No  | Hb_adm<1 Hb_exit<1:  | 11.40962 | 11.40962 | 6.782838 | 6.782838 | Yes |
| No  | No  | Hb_adm>= Hb_exit<1:  | 17.88906 | 17.88906 | 6.758044 | 6.758044 | No  |
| Yes | Yes | Hb_adm<1 Hb_exit<1:  | 11.78832 | 11.78832 | 14.00676 | 14.00676 | Yes |
| Yes | No  | Hb_adm<1 Hb_exit<1:  | 23.84011 | 23.84011 | 7.395219 | 7.395219 | No  |
| Yes | No  | Hb_adm<1 Hb_exit<1:  | 23.1     | 23.1     | 6.52     | 6.52     | No  |
| Yes | Yes | Hb_adm<1 Hb_exit<1:  | 115.2658 | 115.2658 | 32.76662 | 32.76662 | No  |
| Yes |     | Hb_adm<110           | 4.315121 | 3.421942 | 15.97007 | 25.07797 | Yes |
| Yes |     | Hb_adm<110           | 18.98934 | 18.98934 | 12.76827 | 12.76827 | No  |
| Yes | No  | Hb_adm<1 Hb_exit<1:  | 11.17942 | 11.17942 | 8.130709 | 8.130709 | Yes |
| Yes | Yes | Hb_adm<1 Hb_exit<1:  | 8.586573 | 8.586573 | 11.2481  | 11.2481  | Yes |
| Yes | Yes | Hb_adm<1 Hb_exit<1:  | 8.164405 | 8.164405 | 12.19903 | 12.19903 | Yes |
| Yes | No  | Hb_adm<1 Hb_exit<1:  | 3.175754 | 3.175754 | 15.12436 | 15.12436 | Yes |
| Yes | No  | Hb_adm<1 Hb_exit<1:  | 2.962584 | 2.962584 | 9.394828 | 9.394828 | Yes |
| Yes |     | Hb_adm<110           | 2.803036 |          | 12.77148 |          | Yes |
| Yes | No  | Hb_adm<1 Hb_exit<110 |          |          |          |          |     |
| Yes | Yes | Hb_adm<1 Hb_exit<1:  | 8.215806 | 8.215806 | 6.783897 | 6.783897 | Yes |
| Yes | Yes | Hb_adm<1 Hb_exit<1:  | 16.60878 | 16.60878 | 5.620897 | 5.620897 | No  |
| Yes |     | Hb_adm<110           | 30.13771 | 30.13771 | 12.36811 | 12.36811 | No  |
| Yes | No  | Hb_adm<1 Hb_exit<1:  | 44.7083  | 46.20144 | 5.661015 | 4.366195 | No  |
| Yes | Yes | Hb_adm<1 Hb_exit<1:  | 5.455637 | 5.455637 | 8.383941 | 8.383941 | Yes |
| Yes | Yes | Hb_adm<1 Hb_exit<1:  | 11.29381 | 11.29381 | 7.93656  | 7.93656  | Yes |
| Yes | No  | Hb_adm<1 Hb_exit<1:  | 25.14    | 25.14    | 5.255    | 5.255    | No  |
| Yes | Yes | Hb_adm<1 Hb_exit<1:  | 12.97633 | 12.97633 | 8.18974  | 8.18974  | No  |
| Yes |     | Hb_adm<110           | 18.89979 | 18.89979 | 4.629025 | 4.629025 | No  |
| Yes | No  | Hb_adm<1 Hb_exit<1:  | 7.359516 | 7.359516 | 20.47434 | 20.47434 | Yes |
| Yes |     | Hb_adm<110           | 72.91389 | 72.91389 | 7.990621 | 7.990621 | No  |
| Yes | Yes | Hb_adm<1 Hb_exit<1:  | 18.07667 | 18.07667 | 31.94418 | 31.94418 | No  |
| Yes | Yes | Hb_adm<1 Hb_exit<1:  | 6.62251  | 6.62251  | 18.48795 | 18.48795 | Yes |
| Yes | Yes | Hb_adm<1 Hb_exit<1:  | 2.67376  | 2.67376  | 31.05915 | 31.05915 | Yes |
| No  | No  | Hb_adm>= Hb_exit<1:  | 13.46611 | 13.46611 | 6.403712 | 6.403712 | No  |
| Yes | No  | Hb_adm<1 Hb_exit<1:  | 74.34249 | 74.34249 | 8.529502 | 8.529502 | No  |
| Yes | No  | Hb_adm<1 Hb_exit<1:  | 15.28989 | 15.28989 | 11.01782 | 11.01782 | No  |
| Yes | No  | Hb_adm<1 Hb_exit<1:  | 15.04852 | 15.04852 | 6.618623 | 6.618623 | No  |
| No  |     | Hb_adm>=110          | 11.51347 | 11.51347 | 6.585459 | 6.585459 | Yes |
| Yes |     | Hb_adm<110           | 7.687373 | 7.687373 | 14.05284 | 14.05284 | Yes |
| No  | Yes | Hb_adm>= Hb_exit<1:  | 1.068054 | 1.068054 | 8.958161 | 8.958161 | Yes |
| Yes | Yes | Hb_adm<1 Hb_exit<1:  | 1.312738 | 1.312738 | 12.65685 | 12.65685 | Yes |
| No  |     | Hb_adm>=110          | 12.72621 | 12.72621 | 4.902978 | 4.902978 | No  |
| Yes | Yes | Hb_adm<1 Hb_exit<1:  | 42.77166 | 42.77166 | 6.975971 | 6.975971 | No  |
| Yes |     | Hb_adm<110           | 49.91897 | 49.91897 | 3.493963 | 3.493963 | No  |
| No  | No  | Hb_adm>= Hb_exit<1:  | 28.56024 | 28.56024 | 8.368783 | 8.368783 | No  |
| Yes | Yes | Hb_adm<1 Hb_exit<1:  | 11.2086  | 11.2086  | 11.13739 | 11.13739 | Yes |
| Yes | Yes | Hb_adm<1 Hb_exit<1:  | 8.512976 | 8.512976 | 9.268195 | 9.268195 | Yes |
| Yes | No  | Hb_adm<1 Hb_exit<1:  | 4.027572 | 4.027572 | 23.80903 | 23.80903 | Yes |
| Yes | Yes | Hb_adm<1 Hb_exit<1:  | 2.801419 | 2.801419 | 11.8549  | 11.8549  | Yes |

|     |     |                      |          |          |          |          |     |
|-----|-----|----------------------|----------|----------|----------|----------|-----|
| Yes |     | Hb_adm<110           | 9.370198 | 9.370198 | 22.25112 | 22.25112 | Yes |
| Yes | No  | Hb_adm<1 Hb_exit<1:  | 86.12154 | 86.12154 | 13.97082 | 13.97082 | No  |
| Yes | No  | Hb_adm<1 Hb_exit<1:  | 50.19528 | 50.19528 | 16.45878 | 16.45878 | No  |
| Yes | Yes | Hb_adm<1 Hb_exit<1:  | 10.75734 | 58.37096 | 8.028772 | 7.712881 | Yes |
| Yes |     | Hb_adm<110           |          |          |          |          |     |
| Yes | Yes | Hb_adm<1 Hb_exit<1:  | 4.685699 | 1.388488 | 21.42971 | 23.74126 | Yes |
| Yes |     | Hb_adm<110           | 19.14142 | 19.14142 | 11.62702 | 11.62702 | No  |
| Yes |     | Hb_adm<110           | 22.61632 | 22.61632 | 23.82333 | 23.82333 | No  |
| Yes | Yes | Hb_adm<1 Hb_exit<1:  | 2.023914 | 2.023914 | 13.0804  | 13.0804  | Yes |
| Yes |     | Hb_adm<110           | 15.12897 | 15.12897 | 9.323971 | 9.323971 | No  |
| Yes | No  | Hb_adm<1 Hb_exit<1:  | 14.14781 | 14.14781 | 10.88179 | 10.88179 | No  |
| Yes | Yes | Hb_adm<1 Hb_exit<1:  | 78.39    | 78.39    | 7.31     | 7.31     | No  |
| No  | Yes | Hb_adm>= Hb_exit<1:  | 15.17916 | 15.17916 | 12.73901 | 12.73901 | No  |
| Yes | No  | Hb_adm<1 Hb_exit<1:  | 14.73889 | 14.73889 | 6.232929 | 6.232929 | No  |
| Yes | No  | Hb_adm<1 Hb_exit<1:  | 5.987367 | 5.987367 | 6.948984 | 6.948984 | Yes |
| No  |     | Hb_adm>=110          | 4.193367 | 4.193367 | 4.827688 | 4.827688 | Yes |
| Yes | Yes | Hb_adm<1 Hb_exit<1:  | 6.658235 | 6.658235 | 30.20073 | 30.20073 | Yes |
| Yes | Yes | Hb_adm<1 Hb_exit<1:  | 6.862751 | 6.862751 | 9.306171 | 9.306171 | Yes |
| Yes | No  | Hb_adm<1 Hb_exit<1:  | 34.06684 | 34.06684 | 5.951294 | 5.951294 | No  |
| Yes | No  | Hb_adm<1 Hb_exit<1:  | 3.106958 | 3.106958 | 17.02787 | 17.02787 | Yes |
| No  | Yes | Hb_adm>= Hb_exit<1:  | 21.60058 | 21.60058 | 8.338347 | 8.338347 | No  |
| Yes |     | Hb_adm<110           | 12.29881 | 12.29881 | 9.485136 | 9.485136 | No  |
| Yes | No  | Hb_adm<1 Hb_exit<1:  | 3.155431 | 3.155431 | 8.170212 | 8.170212 | Yes |
| No  | Yes | Hb_adm>= Hb_exit<1:  | 45.46069 | 45.46069 | 5.578773 | 5.578773 | No  |
| Yes | No  | Hb_adm<1 Hb_exit<1:  | 3.797804 | 3.797804 | 12.80215 | 12.80215 | Yes |
| No  | Yes | Hb_adm>= Hb_exit<1:  | 11.379   | 11.379   | 4.517539 | 4.517539 | Yes |
| Yes | Yes | Hb_adm<1 Hb_exit<1:  | 6.052678 | 6.052678 | 10.80152 | 10.80152 | Yes |
| Yes | Yes | Hb_adm<1 Hb_exit<1:  | 29.61984 | 29.61984 | 12.79434 | 12.79434 | No  |
| Yes | Yes | Hb_adm<1 Hb_exit<1:  | 2.275219 | 2.275219 | 18.06616 | 18.06616 | Yes |
| No  | No  | Hb_adm>= Hb_exit<1:  | 30.40866 | 30.40866 | 3.741549 | 3.741549 | No  |
| Yes | Yes | Hb_adm<1 Hb_exit<1:  | 8.148695 | 8.148695 | 18.23896 | 18.23896 | Yes |
| Yes |     | Hb_adm<110           | 26.38707 | 26.38707 | 6.957086 | 6.957086 | No  |
| Yes |     | Hb_adm<110           | 18.35985 | 18.35985 | 9.551783 | 9.551783 | No  |
| Yes | Yes | Hb_adm<1 Hb_exit<1:  | 44.73132 | 44.73132 | 5.300325 | 5.300325 | No  |
| Yes | No  | Hb_adm<1 Hb_exit<1:  | 47.0815  | 47.0815  | 12.46624 | 12.46624 | No  |
| Yes | No  | Hb_adm<1 Hb_exit<1:  | 91.418   | 91.418   | 6.459143 | 6.459143 | No  |
| Yes | Yes | Hb_adm<1 Hb_exit<110 |          |          |          |          |     |
| Yes | Yes | Hb_adm<1 Hb_exit<1:  | 36.40354 | 36.40354 | 11.36234 | 11.36234 | No  |
| Yes | No  | Hb_adm<1 Hb_exit<1:  | 28.63799 | 28.63799 | 6.729549 | 6.729549 | No  |
| No  | No  | Hb_adm>= Hb_exit<1:  | 12.77166 | 12.77166 | 7.743733 | 7.743733 | No  |
| Yes | Yes | Hb_adm<1 Hb_exit<1:  | 13.82753 | 13.82753 | 8.305409 | 8.305409 | No  |
| Yes |     | Hb_adm<110           | 38.52611 | 38.52611 | 7.623625 | 7.623625 | No  |
| Yes |     | Hb_adm<110           |          |          |          |          |     |
| Yes |     | Hb_adm<110           | 76.73425 | 76.73425 | 16.02647 | 16.02647 | No  |
| No  |     | Hb_adm>=110          | 15.77314 | 15.77314 | 7.341436 | 7.341436 | No  |
| Yes | Yes | Hb_adm<1 Hb_exit<1:  | 3.435875 | 2.891082 | 18.3311  | 18.40935 | Yes |
| Yes |     | Hb_adm<110           | 38.26547 | 38.26547 | 4.483539 | 4.483539 | No  |
| No  | No  | Hb_adm>= Hb_exit<1:  | 21.60033 | 21.60033 | 5.094954 | 5.094954 | No  |
| Yes | Yes | Hb_adm<1 Hb_exit<1:  | 32.30785 | 32.30785 | 8.665586 | 8.665586 | No  |
| Yes |     | Hb_adm<110           | 11.37225 | 11.37225 | 11.32178 | 11.32178 | Yes |
| Yes |     | Hb_adm<110           |          |          |          |          |     |



|     |     |                      |          |          |          |          |     |
|-----|-----|----------------------|----------|----------|----------|----------|-----|
| Yes | No  | Hb_adm<1 Hb_exit<1:  | 27.229   | 27.229   | 7.104725 | 7.104725 | No  |
| Yes | No  | Hb_adm<1 Hb_exit<1:  | 89.60122 | 89.60122 | 5.469371 | 5.469371 | No  |
| Yes | Yes | Hb_adm<1 Hb_exit<1:  | 15.13886 | 15.13886 | 7.588828 | 7.588828 | No  |
| Yes | Yes | Hb_adm<1 Hb_exit<1:  | 4.538416 | 4.538416 | 11.35881 | 11.35881 | Yes |
| Yes | No  | Hb_adm<1 Hb_exit<1:  | 59.05851 | 59.05851 | 7.139038 | 7.139038 | No  |
| No  | No  | Hb_adm>= Hb_exit<1:  | 5.121114 | 5.121114 | 6.705464 | 6.705464 | Yes |
| Yes | Yes | Hb_adm<1 Hb_exit<1:  | 24.44835 | 24.44835 | 4.378776 | 4.378776 | No  |
| Yes | No  | Hb_adm<1 Hb_exit<1:  | 15.92971 | 8.44     | 8.545882 | 12.16    | No  |
| No  | No  | Hb_adm>= Hb_exit<1:  | 29.56082 | 29.56082 | 7.106675 | 7.106675 | No  |
| Yes | Yes | Hb_adm<1 Hb_exit<1:  | 68.92233 | 68.92233 | 12.7567  | 12.7567  | No  |
| No  | Yes | Hb_adm>= Hb_exit<1:  | 5.314779 | 5.314779 | 10.73483 | 10.73483 | Yes |
| Yes | Yes | Hb_adm<1 Hb_exit<1:  | 12.71581 | 16.5084  | 6.503861 | 6.703216 | No  |
| Yes | Yes | Hb_adm<1 Hb_exit<1:  | 29.13689 | 29.13689 | 9.544619 | 9.544619 | No  |
| Yes |     | Hb_adm<110           | 51.90923 |          | 14.12027 |          | No  |
| Yes | Yes | Hb_adm<1 Hb_exit<1:  | 31.14164 | 31.14164 | 10.20998 | 10.20998 | No  |
| No  |     | Hb_adm>=110          | 16.38311 | 16.38311 | 8.325785 | 8.325785 | No  |
| Yes | Yes | Hb_adm<1 Hb_exit<1:  | 43.816   | 43.816   | 12.20384 | 12.20384 | No  |
| Yes |     | Hb_adm<110           | 57.66314 | 57.66314 | 7.838284 | 7.838284 | No  |
| Yes | No  | Hb_adm<1 Hb_exit<1:  | 5.095984 | 5.095984 | 7.69367  | 7.69367  | Yes |
| Yes |     | Hb_adm<110           | 48.87785 | 48.87785 | 8.573274 | 8.573274 | No  |
| No  |     | Hb_adm>=110          | 9.44267  | 9.44267  | 6.282415 | 6.282415 | Yes |
| Yes | No  | Hb_adm<1 Hb_exit<1:  | 9.275627 | 9.275627 | 10.86034 | 10.86034 | Yes |
| Yes | No  | Hb_adm<1 Hb_exit<1:  | 25.40223 | 25.40223 | 7.824564 | 7.824564 | No  |
| Yes | No  | Hb_adm<1 Hb_exit<1:  | 34.66    | 32.66368 | 7.39     | 7.650901 | No  |
| Yes | Yes | Hb_adm<1 Hb_exit<1:  | 49.08053 | 49.08053 | 5.400255 | 5.400255 | No  |
| Yes |     | Hb_adm<110           | 26.20693 | 26.20693 | 6.755222 | 6.755222 | No  |
| No  | No  | Hb_adm>= Hb_exit<1:  | 32.86445 | 32.86445 | 6.705406 | 6.705406 | No  |
| Yes | No  | Hb_adm<1 Hb_exit<1:  | 6.491965 | 6.491965 | 8.216761 | 8.216761 | Yes |
| Yes | No  | Hb_adm<1 Hb_exit<1:  | 17.96774 | 17.96774 | 8.52329  | 8.52329  | No  |
| Yes | Yes | Hb_adm<1 Hb_exit<1:  | 22.25183 | 11.32686 | 8.557108 | 11.54916 | No  |
| Yes | No  | Hb_adm<1 Hb_exit<1:  | 2.737048 | 2.737048 | 11.56711 | 11.56711 | Yes |
| Yes | No  | Hb_adm<1 Hb_exit<1:  | 8.862556 | 8.862556 | 8.259611 | 8.259611 | Yes |
| Yes | No  | Hb_adm<1 Hb_exit<1:  | 3.049374 | 3.049374 | 6.351679 | 6.351679 | Yes |
| Yes | Yes | Hb_adm<1 Hb_exit<1:  | 15.26387 | 15.26387 | 4.935455 | 4.935455 | No  |
| Yes | No  | Hb_adm<1 Hb_exit<1:  | 28.36864 | 36.10263 | 7.199741 | 6.888201 | No  |
| No  | No  | Hb_adm>= Hb_exit<1:  | 12.75058 | 12.75058 | 8.069489 | 8.069489 | No  |
| Yes |     | Hb_adm<110           | 3.140783 | 3.140783 | 16.81607 | 16.81607 | Yes |
| Yes | Yes | Hb_adm<1 Hb_exit<110 |          |          |          |          |     |
| Yes |     | Hb_adm<110           | 14.85936 | 14.85936 | 7.53099  | 7.53099  | No  |
| No  | No  | Hb_adm>= Hb_exit<1:  | 12.08189 | 12.08189 | 6.674014 | 6.674014 | No  |
| Yes | No  | Hb_adm<1 Hb_exit<1:  | 81.39815 | 81.39815 | 3.939136 | 3.939136 | No  |
| No  | Yes | Hb_adm>= Hb_exit<1:  | 13.09624 | 13.09624 | 4.192906 | 4.192906 | No  |
| No  |     | Hb_adm>=110          | 35.23499 | 35.23499 | 7.882332 | 7.882332 | No  |
| No  | No  | Hb_adm>= Hb_exit<1:  | 26.30927 | 47.85688 | 5.113919 | 4.636503 | No  |
| Yes | No  | Hb_adm<1 Hb_exit<1:  | 7.300114 | 7.300114 | 8.307593 | 8.307593 | Yes |
| Yes |     | Hb_adm<110           | 5.388951 | 5.388951 | 10.60621 | 10.60621 | Yes |
| Yes |     | Hb_adm<110           | 17.10118 | 17.10118 | 6.255856 | 6.255856 | No  |
| Yes |     | Hb_adm<110           |          |          |          |          |     |
| Yes |     | Hb_adm<110           | 3.866131 | 3.866131 | 5.519876 | 5.519876 | Yes |
| No  | No  | Hb_adm>= Hb_exit<1:  | 22.38295 | 22.38295 | 4.913402 | 4.913402 | No  |
| No  |     | Hb_adm>=110          | 5.959787 | 5.959787 | 5.260226 | 5.260226 | Yes |

|     |     |                     |          |          |          |          |     |
|-----|-----|---------------------|----------|----------|----------|----------|-----|
| No  | No  | Hb_adm>= Hb_exit<1: | 13.17695 | 13.17695 | 5.48568  | 5.48568  | No  |
| Yes |     | Hb_adm<110          | 7.007482 | 7.007482 | 5.564091 | 5.564091 | Yes |
| No  |     | Hb_adm>=110         | 11.28432 | 11.28432 | 6.382707 | 6.382707 | Yes |
| Yes |     | Hb_adm<110          | 5.139231 | 5.139231 | 18.24934 | 18.24934 | Yes |
| Yes | Yes | Hb_adm<1 Hb_exit<1: | 46.56977 | 46.56977 | 7.035248 | 7.035248 | No  |
| No  |     | Hb_adm>=110         |          |          |          |          |     |
| No  | Yes | Hb_adm>= Hb_exit<1: | 14.69269 | 14.69269 | 6.241387 | 6.241387 | No  |
| Yes |     | Hb_adm<110          | 16.21489 | 3.14121  | 6.041611 | 7.637252 | No  |
| Yes | Yes | Hb_adm<1 Hb_exit<1: | 4.47094  | 4.47094  | 6.495558 | 6.495558 | Yes |
| Yes | Yes | Hb_adm<1 Hb_exit<1: | 1.79438  | 1.79438  | 18.57123 | 18.57123 | Yes |
| Yes | Yes | Hb_adm<1 Hb_exit<1: | 36.8826  | 36.8826  | 9.628541 | 9.628541 | No  |
| Yes |     | Hb_adm<110          | 6.760108 | 6.760108 | 8.456922 | 8.456922 | Yes |
| No  |     | Hb_adm>=110         | 21.45179 | 21.45179 | 1.232258 | 1.232258 | No  |
| Yes | No  | Hb_adm<1 Hb_exit<1: | 8.793067 | 8.793067 | 6.770532 | 6.770532 | Yes |
| No  | No  | Hb_adm>= Hb_exit<1: | 71.3144  | 71.3144  | 5.195004 | 5.195004 | No  |
| No  | Yes | Hb_adm>= Hb_exit<1: | 18.68754 | 18.68754 | 5.911038 | 5.911038 | No  |
| Yes |     | Hb_adm<110          | 16.40644 | 16.40644 | 22.37699 | 22.37699 | No  |
| Yes | Yes | Hb_adm<1 Hb_exit<1: | 16.69844 | 16.69844 | 4.850794 | 4.850794 | No  |
| Yes | No  | Hb_adm<1 Hb_exit<1: | 9.455244 | 9.455244 | 21.59408 | 21.59408 | Yes |
| No  | No  | Hb_adm>= Hb_exit<1: | 30.96    | 30.96    | 8.78     | 8.78     | No  |
| No  | No  | Hb_adm>= Hb_exit<1: | 0.767552 | 0.767552 | 16.95782 | 16.95782 | Yes |
| Yes |     | Hb_adm<110          | 65.23973 | 65.23973 | 9.926439 | 9.926439 | No  |
| No  |     | Hb_adm>=110         | 2.441186 | 2.441186 | 31.05855 | 31.05855 | Yes |
| Yes | No  | Hb_adm<1 Hb_exit<1: | 15.09921 | 15.09921 | 5.479455 | 5.479455 | No  |
| Yes |     | Hb_adm<110          | 9.504754 | 9.504754 | 7.390668 | 7.390668 | Yes |
| No  |     | Hb_adm>=110         | 30.09414 | 30.09414 | 5.879032 | 5.879032 | No  |
| No  | No  | Hb_adm>= Hb_exit<1: | 10.93379 | 10.93379 | 11.51536 | 11.51536 | Yes |
| Yes | Yes | Hb_adm<1 Hb_exit<1: | 5.853856 | 5.853856 | 8.064684 | 8.064684 | Yes |
| Yes | No  | Hb_adm<1 Hb_exit<1: | 37.65031 | 37.65031 | 11.95255 | 11.95255 | No  |
| Yes | Yes | Hb_adm<1 Hb_exit<1: | 101.7074 | 18.48606 | 13.65934 | 16.95254 | No  |
| No  | No  | Hb_adm>= Hb_exit<1: | 9.318997 | 9.318997 | 8.655619 | 8.655619 | Yes |
| No  |     | Hb_adm>=110         | 9.724017 | 9.724017 | 7.819748 | 7.819748 | Yes |
| No  | Yes | Hb_adm>= Hb_exit<1: | 22.38146 | 22.38146 | 7.54675  | 7.54675  | No  |
| Yes |     | Hb_adm<110          | 12.81831 |          | 11.02617 |          | No  |
| Yes |     | Hb_adm<110          | 3.709611 | 3.709611 | 13.20773 | 13.20773 | Yes |
| Yes |     | Hb_adm<110          | 34.43609 | 23.89203 | 12.90073 | 18.66779 | No  |
| Yes | No  | Hb_adm<1 Hb_exit<1: | 20.40526 | 20.40526 | 5.732276 | 5.732276 | No  |
| Yes | Yes | Hb_adm<1 Hb_exit<1: | 19.8659  | 19.8659  | 2.895685 | 2.895685 | No  |
| Yes |     | Hb_adm<110          | 45.56186 | 45.56186 | 8.450797 | 8.450797 | No  |
| Yes |     | Hb_adm<110          | 26.76287 | 26.76287 | 8.186337 | 8.186337 | No  |
| Yes |     | Hb_adm<110          | 112.3486 | 112.3486 | 2.933003 | 2.933003 | No  |
| Yes | No  | Hb_adm<1 Hb_exit<1: | 11.31232 | 13.26237 | 9.439209 | 6.556453 | Yes |
| No  |     | Hb_adm>=110         | 49.16079 | 49.16079 | 4.15277  | 4.15277  | No  |
| No  |     | Hb_adm>=110         | 10.71468 | 10.71468 | 7.376924 | 7.376924 | Yes |
| No  |     | Hb_adm>=110         | 7.050208 | 7.050208 | 4.818912 | 4.818912 | Yes |
| Yes |     | Hb_adm<110          | 9.305854 | 9.305854 | 7.78201  | 7.78201  | Yes |
| No  | No  | Hb_adm>= Hb_exit<1: | 4.860955 | 4.860955 | 8.926075 | 8.926075 | Yes |
| No  | No  | Hb_adm>= Hb_exit<1: | 21.12    | 21.12    | 5.41     | 5.41     | No  |
| Yes | Yes | Hb_adm<1 Hb_exit<1: | 8.431677 | 8.431677 | 6.873292 | 6.873292 | Yes |
| Yes |     | Hb_adm<110          | 11.86817 | 11.86817 | 7.701907 | 7.701907 | Yes |
| No  |     | Hb_adm>=110         | 19.85606 | 19.85606 | 6.484838 | 6.484838 | No  |

|     |     |                      |          |          |          |          |     |
|-----|-----|----------------------|----------|----------|----------|----------|-----|
| Yes | Yes | Hb_adm<1Hb_exit<1:   | 9.384598 | 9.384598 | 6.961774 | 6.961774 | Yes |
| Yes |     | Hb_adm<110           | 9.371788 | 9.371788 | 9.802356 | 9.802356 | Yes |
| No  |     | Hb_adm>=110          | 22.13555 | 22.13555 | 5.43294  | 5.43294  | No  |
| No  | Yes | Hb_adm>= Hb_exit<110 |          |          |          |          |     |
| No  | No  | Hb_adm>= Hb_exit<1:  | 7.24     | 7.24     | 10.07    | 10.07    | Yes |
| Yes |     | Hb_adm<110           | 46.29002 | 46.29002 | 4.513955 | 4.513955 | No  |
| Yes | No  | Hb_adm<1Hb_exit<1:   | 4.407326 | 4.407326 | 9.448406 | 9.448406 | Yes |
| Yes |     | Hb_adm<110           | 11.28196 | 11.28196 | 7.877964 | 7.877964 | Yes |
| Yes |     | Hb_adm<110           |          |          |          |          |     |
| Yes |     | Hb_adm<110           | 10.78623 | 10.78623 | 5.904344 | 5.904344 | Yes |
| Yes | Yes | Hb_adm<1Hb_exit<1:   | 23.62624 | 23.62624 | 1.863127 | 1.863127 | No  |
| No  |     | Hb_adm>=110          | 4.78     | 4.78     | 8.1      | 8.1      | Yes |
| No  |     | Hb_adm>=110          | 12.76533 | 12.76533 | 5.871038 | 5.871038 | No  |
| Yes |     | Hb_adm<110           | 2.706995 | 2.706995 | 10.48439 | 10.48439 | Yes |
| No  | Yes | Hb_adm>= Hb_exit<1:  | 59.58704 | 43.68402 | 6.847526 | 5.653744 | No  |
| Yes |     | Hb_adm<110           | 10.45423 | 10.45423 | 5.851913 | 5.851913 | Yes |
| Yes | Yes | Hb_adm<1Hb_exit<1:   | 4.228427 | 4.228427 | 6.755425 | 6.755425 | Yes |
| Yes |     | Hb_adm<110           | 4.994087 | 4.994087 | 5.932545 | 5.932545 | Yes |
| Yes | No  | Hb_adm<1Hb_exit<1:   | 19.10114 | 19.10114 | 11.25835 | 11.25835 | No  |
| Yes |     | Hb_adm<110           | 8.123296 | 8.123296 | 8.499944 | 8.499944 | Yes |
| No  |     | Hb_adm>=110          | 13.94108 | 13.94108 | 5.38669  | 5.38669  | No  |
| Yes |     | Hb_adm<110           | 2.103258 | 2.103258 | 14.7247  | 14.7247  | Yes |
| Yes |     | Hb_adm<110           |          |          |          |          |     |
| No  | No  | Hb_adm>= Hb_exit<1:  | 16.04118 | 16.04118 | 1.598148 | 1.598148 | No  |
| Yes | Yes | Hb_adm<1Hb_exit<1:   | 25.77487 | 25.77487 | 10.48421 | 10.48421 | No  |
| Yes |     | Hb_adm<110           |          |          |          |          |     |
| Yes | No  | Hb_adm<1Hb_exit<1:   | 0.480397 | 0.480397 | 26.93359 | 26.93359 | Yes |
| No  | Yes | Hb_adm>= Hb_exit<1:  | 9.009884 | 9.009884 | 10.97538 | 10.97538 | Yes |
| No  | Yes | Hb_adm>= Hb_exit<1:  | 32.25444 | 32.25444 | 4.250556 | 4.250556 | No  |
| Yes | Yes | Hb_adm<1Hb_exit<1:   | 44.44526 | 44.44526 | 7.502357 | 7.502357 | No  |
| Yes | Yes | Hb_adm<1Hb_exit<1:   | 53.57029 | 53.57029 | 7.027424 | 7.027424 | No  |
| Yes | Yes | Hb_adm<1Hb_exit<1:   | 14.02764 | 14.02764 | 24.60758 | 24.60758 | No  |
| Yes | Yes | Hb_adm<1Hb_exit<110  |          |          |          |          |     |
| No  | No  | Hb_adm>= Hb_exit<1:  | 7.423246 | 7.423246 | 7.345045 | 7.345045 | Yes |
| No  | No  | Hb_adm>= Hb_exit<1:  | 83.32157 | 83.32157 | 4.906793 | 4.906793 | No  |
| Yes | Yes | Hb_adm<1Hb_exit<1:   | 3.19328  | 3.19328  | 17.63559 | 17.63559 | Yes |
| Yes | No  | Hb_adm<1Hb_exit<1:   | 9.043604 | 4.774701 | 7.311268 | 2.625756 | Yes |
| Yes |     | Hb_adm<110           | 7.433407 | 7.433407 | 9.825954 | 9.825954 | Yes |
| No  | No  | Hb_adm>= Hb_exit<1:  | 16.49    | 16.49    | 6.59     | 6.59     | No  |
| No  | Yes | Hb_adm>= Hb_exit<1:  | 19.49642 | 13.13813 | 8.253569 | 4.053117 | No  |
| Yes |     | Hb_adm<110           | 14.26665 | 14.26665 | 7.607702 | 7.607702 | No  |
| Yes | No  | Hb_adm<1Hb_exit<1:   | 42.7757  | 42.7757  | 13.21931 | 13.21931 | No  |
| Yes | No  | Hb_adm<1Hb_exit<1:   | 3.045629 | 3.045629 | 10.47628 | 10.47628 | Yes |
| No  | No  | Hb_adm>= Hb_exit<1:  | 8.417609 | 8.417609 | 7.90254  | 7.90254  | Yes |
| Yes | Yes | Hb_adm<1Hb_exit<1:   | 13.89474 | 13.89474 | 10.7918  | 10.7918  | No  |
| Yes | No  | Hb_adm<1Hb_exit<1:   | 3.78     | 3.05     | 7.4      | 23.57    | Yes |
| Yes | Yes | Hb_adm<1Hb_exit<1:   | 22.9066  | 22.9066  | 8.563769 | 8.563769 | No  |
| No  |     | Hb_adm>=110          | 78.26492 | 78.26492 | 7.286365 | 7.286365 | No  |
| Yes |     | Hb_adm<110           | 1.29312  | 1.29312  | 17.47558 | 17.47558 | Yes |
| Yes |     | Hb_adm<110           | 45.32827 | 45.32827 | 6.229585 | 6.229585 | No  |
| Yes | Yes | Hb_adm<1Hb_exit<1:   | 15.97906 | 15.97906 | 11.89218 | 11.89218 | No  |

|     |     |                     |          |          |          |          |     |
|-----|-----|---------------------|----------|----------|----------|----------|-----|
| No  | Yes | Hb_adm>= Hb_exit<1: | 13.7437  | 13.7437  | 10.22529 | 10.22529 | No  |
| No  |     | Hb_adm>=110         | 23.6023  | 23.6023  | 14.44735 | 14.44735 | No  |
| Yes |     | Hb_adm<110          | 6.77202  | 6.77202  | 13.19526 | 13.19526 | Yes |
| Yes | Yes | Hb_adm<1 Hb_exit<1: | 51.36712 | 31.97257 | 4.86747  | 0.61636  | No  |
| Yes |     | Hb_adm<110          | 6.07837  | 6.07837  | 12.4095  | 12.4095  | Yes |
| Yes |     | Hb_adm<110          | 51.18407 | 51.18407 | 24.76965 | 24.76965 | No  |
| Yes | Yes | Hb_adm<1 Hb_exit<1: | 16.20174 | 16.20174 | 1.419713 | 1.419713 | No  |
| Yes |     | Hb_adm<110          | 40.43849 | 40.43849 | 5.188506 | 5.188506 | No  |
| Yes | No  | Hb_adm<1 Hb_exit<1: | 28.13117 | 25.95469 | 16.54248 | 5.568536 | No  |
| Yes |     | Hb_adm<110          | 36.02554 | 36.02554 | 11.04356 | 11.04356 | No  |
| Yes | Yes | Hb_adm<1 Hb_exit<1: | 31.7271  | 23.00523 | 9.143296 | 13.11831 | No  |
| Yes | Yes | Hb_adm<1 Hb_exit<1: | 28.39473 | 28.39473 | 30.80299 | 30.80299 | No  |
| Yes |     | Hb_adm<110          |          |          |          |          |     |
| Yes | Yes | Hb_adm<1 Hb_exit<1: | 20.99512 | 20.99512 | 12.60877 | 12.60877 | No  |
| Yes |     | Hb_adm<110          | 11.50931 | 11.50931 | 11.03364 | 11.03364 | Yes |
| Yes | Yes | Hb_adm<1 Hb_exit<1: | 11.73598 | 11.73598 | 29.55452 | 29.55452 | Yes |
| Yes |     | Hb_adm<110          | 4.745962 | 4.745962 | 12.26052 | 12.26052 | Yes |
| No  |     | Hb_adm>=110         | 27.93367 | 27.93367 | 2.678669 | 2.678669 | No  |
| Yes |     | Hb_adm<110          | 1.890298 |          | 9.63095  |          | Yes |
| Yes |     | Hb_adm<110          | 17.9743  |          | 5.477446 |          | No  |
| Yes |     | Hb_adm<110          | 63.67495 | 63.67495 | 11.96162 | 11.96162 | No  |
| Yes | No  | Hb_adm<1 Hb_exit<1: | 5.656906 | 5.656906 | 16.77161 | 16.77161 | Yes |
| Yes | Yes | Hb_adm<1 Hb_exit<1: | 13.13815 | 13.13815 | 5.597199 | 5.597199 | No  |
| Yes | Yes | Hb_adm<1 Hb_exit<1: | 25.675   | 25.675   | 1.145    | 1.145    | No  |
| Yes |     | Hb_adm<110          | 129.3426 | 129.3426 | 6.447489 | 6.447489 | No  |
| Yes | Yes | Hb_adm<1 Hb_exit<1: | 0.554383 | 0.554383 | 29.63294 | 29.63294 | Yes |
| Yes | Yes | Hb_adm<1 Hb_exit<1: | 13.95672 | 30.97527 | 10.49624 | 15.73289 | No  |
| Yes | No  | Hb_adm<1 Hb_exit<1: | 3.94552  | 12.41    | 34.69958 | 14.605   | Yes |
| Yes | No  | Hb_adm<1 Hb_exit<1: | 6.170087 | 17.48974 | 7.082283 | 4.423523 | Yes |
| Yes | Yes | Hb_adm<1 Hb_exit<1: | 31.741   | 2.396762 | 13.3794  | 31.14529 | No  |
| Yes | Yes | Hb_adm<1 Hb_exit<1: | 1.319366 | 1.319366 | 30.4681  | 30.4681  | Yes |
| Yes | No  | Hb_adm<1 Hb_exit<1: | 7.991458 | 7.991458 | 4.295696 | 4.295696 | Yes |
| Yes |     | Hb_adm<110          | 15.18962 | 15.18962 | 10.21596 | 10.21596 | No  |
| Yes | No  | Hb_adm<1 Hb_exit<1: | 44.93239 | 19.99333 | 6.612932 | 5.54226  | No  |
| Yes | No  | Hb_adm<1 Hb_exit<1: | 65.41692 | 65.41692 | 4.42119  | 4.42119  | No  |
| Yes | Yes | Hb_adm<1 Hb_exit<1: | 5.974348 | 5.974348 | 12.68408 | 12.68408 | Yes |
| Yes |     | Hb_adm<110          | 5.719196 | 5.719196 | 18.08063 | 18.08063 | Yes |
| Yes |     | Hb_adm<110          |          |          |          |          |     |
| Yes |     | Hb_adm<110          | 2.278963 | 2.278963 | 25.82495 | 25.82495 | Yes |
| Yes | Yes | Hb_adm<1 Hb_exit<1: | 11.16102 | 11.16102 | 0.951734 | 0.951734 | Yes |
| Yes | Yes | Hb_adm<1 Hb_exit<1: | 2.379137 | 2.379137 | 21.43763 | 21.43763 | Yes |
| Yes | Yes | Hb_adm<1 Hb_exit<1: | 6.499218 | 6.499218 | 11.14366 | 11.14366 | Yes |
| Yes | No  | Hb_adm<1 Hb_exit<1: | 9.6066   | 9.6066   | 12.42256 | 12.42256 | Yes |
| Yes |     | Hb_adm<110          | 64.52378 | 64.52378 | 8.332484 | 8.332484 | No  |
| No  | Yes | Hb_adm>= Hb_exit<1: | 23.90939 | 23.90939 | 5.624327 | 5.624327 | No  |
| Yes | No  | Hb_adm<1 Hb_exit<1: | 7.840074 | 27.66265 | 14.02249 | 12.6454  | Yes |
| Yes | No  | Hb_adm<1 Hb_exit<1: | 12.68224 | 1.987586 | 10.338   | 31.41145 | No  |
| Yes |     | Hb_adm<110          |          |          |          |          |     |
| Yes |     | Hb_adm<110          | 4.784619 | 4.784619 | 14.09891 | 14.09891 | Yes |
| Yes |     | Hb_adm<110          | 6.308842 | 6.308842 | 20.93789 | 20.93789 | Yes |
| Yes |     | Hb_adm<110          | 10.94471 | 10.94471 | 16.10609 | 16.10609 | Yes |

|     |     |                     |          |          |          |          |     |
|-----|-----|---------------------|----------|----------|----------|----------|-----|
| No  |     | Hb_adm>=110         |          |          |          |          |     |
| Yes |     | Hb_adm<110          | 56.07439 | 56.07439 | 5.071014 | 5.071014 | No  |
| No  |     | Hb_adm>=110         | 9.960198 | 9.960198 | 8.626915 | 8.626915 | Yes |
| Yes | No  | Hb_adm<1 Hb_exit<1: | 4.946059 | 4.946059 | 19.42273 | 19.42273 | Yes |
| No  | No  | Hb_adm>= Hb_exit<1: | 5.797295 | 5.797295 | 11.15701 | 11.15701 | Yes |
| Yes | Yes | Hb_adm<1 Hb_exit<1: | 33.99574 | 33.99574 | 4.645562 | 4.645562 | No  |
| Yes |     | Hb_adm<110          | 11.77911 | 11.77911 | 6.872361 | 6.872361 | Yes |
| Yes | Yes | Hb_adm<1 Hb_exit<1: | 20.70594 | 20.70594 | 18.56123 | 18.56123 | No  |
| No  | No  | Hb_adm>= Hb_exit<1: | 19.92119 | 19.92119 | 1.134342 | 1.134342 | No  |
| No  |     | Hb_adm>=110         | 19.0053  | 19.0053  | 5.069802 | 5.069802 | No  |
| Yes | Yes | Hb_adm<1 Hb_exit<1: | 3.64963  | 3.64963  | 28.41727 | 28.41727 | Yes |
| Yes |     | Hb_adm<110          | 21.2935  | 21.2935  | 5.446564 | 5.446564 | No  |
| No  | No  | Hb_adm>= Hb_exit<1: | 18.68476 | 18.68476 | 9.753433 | 9.753433 | No  |
| No  | Yes | Hb_adm>= Hb_exit<1: | 3.700166 | 3.700166 | 8.104896 | 8.104896 | Yes |
| Yes | Yes | Hb_adm<1 Hb_exit<1: | 2.67089  | 2.67089  | 17.60479 | 17.60479 | Yes |
| Yes | Yes | Hb_adm<1 Hb_exit<1: | 19.48472 | 19.48472 | 14.30211 | 14.30211 | No  |
| Yes |     | Hb_adm<110          | 2.342537 | 2.342537 | 10.859   | 10.859   | Yes |
| Yes | Yes | Hb_adm<1 Hb_exit<1: | 2.423512 | 0.794288 | 27.5874  | 36.16184 | Yes |
| Yes |     | Hb_adm<110          | 6.568378 | 6.568378 | 7.332437 | 7.332437 | Yes |
| Yes | Yes | Hb_adm<1 Hb_exit<1: | 5.662785 | 5.662785 | 13.13859 | 13.13859 | Yes |
| Yes | Yes | Hb_adm<1 Hb_exit<1: | 13.31221 | 13.31221 | 10.88723 | 10.88723 | No  |
| Yes | No  | Hb_adm<1 Hb_exit<1: | 47.45053 | 47.45053 | 7.963035 | 7.963035 | No  |
| Yes | Yes | Hb_adm<1 Hb_exit<1: | 29.23622 | 29.23622 | 6.834936 | 6.834936 | No  |
| Yes | Yes | Hb_adm<1 Hb_exit<1: | 2.598578 | 2.598578 | 9.525991 | 9.525991 | Yes |
| No  | Yes | Hb_adm>= Hb_exit<1: | 96.40399 | 96.40399 | 13.87903 | 13.87903 | No  |
| Yes | No  | Hb_adm<1 Hb_exit<1: | 10.26396 | 10.26396 | 5.322774 | 5.322774 | Yes |
| Yes | No  | Hb_adm<1 Hb_exit<1: | 6.440939 | 6.440939 | 6.210708 | 6.210708 | Yes |
| Yes | Yes | Hb_adm<1 Hb_exit<1: | 31.8195  | 3.260259 | 12.63928 | 15.71599 | No  |
| Yes | Yes | Hb_adm<1 Hb_exit<1: | 19.74222 | 19.74222 | 5.417159 | 5.417159 | No  |
| Yes | Yes | Hb_adm<1 Hb_exit<1: | 37.44465 | 3.557697 | 22.81539 | 13.48042 | No  |
| Yes | No  | Hb_adm<1 Hb_exit<1: | 5.076495 | 5.076495 | 6.0831   | 6.0831   | Yes |
| Yes | Yes | Hb_adm<1 Hb_exit<1: | 47.76075 | 47.76075 | 6.419081 | 6.419081 | No  |
| Yes |     | Hb_adm<110          | 35.40409 | 35.40409 | 9.296657 | 9.296657 | No  |
| No  | No  | Hb_adm>= Hb_exit<1: | 40.38095 | 33.85693 | 6.512147 | 4.286148 | No  |
| No  |     | Hb_adm>=110         | 55.49608 | 55.49608 | 3.487791 | 3.487791 | No  |
| No  | No  | Hb_adm>= Hb_exit<1: | 85.63715 | 85.63715 | 5.578312 | 5.578312 | No  |
| Yes | Yes | Hb_adm<1 Hb_exit<1: | 4.30565  | 4.30565  | 4.161594 | 4.161594 | Yes |
| Yes | Yes | Hb_adm<1 Hb_exit<1: | 50.99384 | 50.99384 | 8.538251 | 8.538251 | No  |
| No  | No  | Hb_adm>= Hb_exit<1: | 7.72227  | 7.72227  | 13.63784 | 13.63784 | Yes |
| Yes | Yes | Hb_adm<1 Hb_exit<1: | 7.37391  | 5.991141 | 11.21658 | 12.14137 | Yes |
| Yes |     | Hb_adm<110          | 5.474959 | 5.474959 | 8.031912 | 8.031912 | Yes |
| Yes | No  | Hb_adm<1 Hb_exit<1: | 30.36023 | 46.34541 | 6.600292 | 0.671223 | No  |
| Yes | No  | Hb_adm<1 Hb_exit<1: | 1.175951 | 3.624185 | 20.67947 | 13.82293 | Yes |
| Yes | No  | Hb_adm<1 Hb_exit<1: | 16.45395 | 16.45395 | 13.06965 | 13.06965 | No  |
| Yes | Yes | Hb_adm<1 Hb_exit<1: | 32.11377 | 32.11377 | 6.459455 | 6.459455 | No  |
| Yes | No  | Hb_adm<1 Hb_exit<1: | 22.99525 | 22.99525 | 7.498701 | 7.498701 | No  |
| Yes | No  | Hb_adm<1 Hb_exit<1: | 6.586069 | 6.586069 | 8.704843 | 8.704843 | Yes |
| Yes | No  | Hb_adm<1 Hb_exit<1: | 12.58781 | 12.58781 | 8.039776 | 8.039776 | No  |
| Yes | Yes | Hb_adm<1 Hb_exit<1: | 94.53    | 94.53    | 8.1      | 8.1      | No  |
| Yes | Yes | Hb_adm<1 Hb_exit<1: | 5.113863 | 11.24546 | 7.020412 | 6.662572 | Yes |
| No  | No  | Hb_adm>= Hb_exit<1: | 20.85833 | 20.85833 | 7.022944 | 7.022944 | No  |

|     |     |                     |          |          |          |          |     |
|-----|-----|---------------------|----------|----------|----------|----------|-----|
| Yes |     | Hb_adm<110          | 4.710939 | 4.710939 | 13.46258 | 13.46258 | Yes |
| Yes | Yes | Hb_adm<1 Hb_exit<1: | 18.41112 | 18.41112 | 9.683381 | 9.683381 | No  |
| Yes | Yes | Hb_adm<1 Hb_exit<1: | 28.83847 | 28.83847 | 6.178175 | 6.178175 | No  |
| Yes | Yes | Hb_adm<1 Hb_exit<1: | 11.18167 | 11.18167 | 16.42933 | 16.42933 | Yes |
| Yes | No  | Hb_adm<1 Hb_exit<1: | 12.86011 | 12.86011 | 8.841555 | 8.841555 | No  |
| Yes | Yes | Hb_adm<1 Hb_exit<1: | 6.098464 | 4.055957 | 3.008006 | 16.13499 | Yes |
| Yes | No  | Hb_adm<1 Hb_exit<1: | 10.9808  | 10.9808  | 10.21046 | 10.21046 | Yes |
| Yes | Yes | Hb_adm<1 Hb_exit<1: | 12.64497 | 8.162857 | 6.782049 | 9.396494 | No  |
| Yes | Yes | Hb_adm<1 Hb_exit<1: | 14.02513 | 14.02513 | 5.716422 | 5.716422 | No  |
| Yes | Yes | Hb_adm<1 Hb_exit<1: | 54.82322 | 54.82322 | 18.28047 | 18.28047 | No  |
| Yes | Yes | Hb_adm<1 Hb_exit<1: | 22.30696 | 22.30696 | 12.70537 | 12.70537 | No  |
| Yes | Yes | Hb_adm<1 Hb_exit<1: | 5.91157  | 6.328538 | 9.723664 | 9.725682 | Yes |
| Yes | Yes | Hb_adm<1 Hb_exit<1: | 74.73368 | 74.73368 | 36.06147 | 36.06147 | No  |
| Yes | Yes | Hb_adm<1 Hb_exit<1: | 1.702596 | 1.702596 | 28.02033 | 28.02033 | Yes |
| No  | No  | Hb_adm>= Hb_exit<1: | 19.05095 | 19.05095 | 5.092589 | 5.092589 | No  |
| Yes |     | Hb_adm<110          | 31.60944 | 31.60944 | 9.98741  | 9.98741  | No  |
| Yes | Yes | Hb_adm<1 Hb_exit<1: | 9.122002 | 24.77457 | 23.54711 | 13.85647 | Yes |
| Yes | No  | Hb_adm<1 Hb_exit<1: | 28.60227 | 28.60227 | 6.161796 | 6.161796 | No  |
| Yes | No  | Hb_adm<1 Hb_exit<1: | 32.26208 | 32.26208 | 7.211872 | 7.211872 | No  |
| Yes | Yes | Hb_adm<1 Hb_exit<1: | 11.69963 | 11.69963 | 8.98456  | 8.98456  | Yes |
| Yes | No  | Hb_adm<1 Hb_exit<1: | 3.857793 | 3.857793 | 12.72705 | 12.72705 | Yes |
| Yes | Yes | Hb_adm<1 Hb_exit<1: | 11.90784 | 11.90784 | 9.105052 | 9.105052 | Yes |
| Yes |     | Hb_adm<110          | 3.392814 | 3.392814 | 10.60914 | 10.60914 | Yes |
| Yes | No  | Hb_adm<1 Hb_exit<1: | 18.95953 | 18.95953 | 8.022494 | 8.022494 | No  |
| No  |     | Hb_adm>=110         | 39.60195 | 39.60195 | 7.644331 | 7.644331 | No  |
| Yes | Yes | Hb_adm<1 Hb_exit<1: | 4.107825 | 4.107825 | 9.579388 | 9.579388 | Yes |
| Yes |     | Hb_adm<110          | 1.668353 | 1.668353 | 12.77405 | 12.77405 | Yes |
| Yes |     | Hb_adm<110          | 3.44     | 3.44     | 40       | 40       | Yes |
| Yes | Yes | Hb_adm<1 Hb_exit<1: | 8.101207 | 8.101207 | 16.84765 | 16.84765 | Yes |
| Yes |     | Hb_adm<110          | 1.188881 | 1.188881 | 28.29528 | 28.29528 | Yes |
| Yes |     | Hb_adm<110          | 4.143487 | 4.143487 | 6.941167 | 6.941167 | Yes |
| Yes |     | Hb_adm<110          | 21.48672 | 21.48672 | 6.923322 | 6.923322 | No  |
| Yes | Yes | Hb_adm<1 Hb_exit<1: | 7.509378 | 7.509378 | 16.48299 | 16.48299 | Yes |
| Yes | Yes | Hb_adm<1 Hb_exit<1: | 6.560283 | 6.560283 | 6.136386 | 6.136386 | Yes |
| Yes | Yes | Hb_adm<1 Hb_exit<1: | 1.32862  | 1.32862  | 39.91707 | 39.91707 | Yes |
| Yes | No  | Hb_adm<1 Hb_exit<1: | 5.62615  | 5.62615  | 8.170511 | 8.170511 | Yes |
| Yes | Yes | Hb_adm<1 Hb_exit<1: | 5.531889 | 0.817594 | 12.6894  | 11.85578 | Yes |
| Yes | Yes | Hb_adm<1 Hb_exit<1: | 3.519642 | 3.519642 | 20.01603 | 20.01603 | Yes |
| No  |     | Hb_adm>=110         | 10.5556  | 10.5556  | 7.599537 | 7.599537 | Yes |
| No  | No  | Hb_adm>= Hb_exit<1: | 3.056318 | 3.056318 | 3.960773 | 3.960773 | Yes |
| Yes | Yes | Hb_adm<1 Hb_exit<1: | 4.399109 | 4.399109 | 13.59006 | 13.59006 | Yes |
| Yes |     | Hb_adm<110          | 2.1887   | 2.1887   | 16.8931  | 16.8931  | Yes |
| Yes | No  | Hb_adm<1 Hb_exit<1: | 9.331387 | 9.331387 | 9.059351 | 9.059351 | Yes |
| Yes |     | Hb_adm<110          | 4.295962 | 4.295962 | 33.02292 | 33.02292 | Yes |
| Yes | Yes | Hb_adm<1 Hb_exit<1: | 28.32574 | 81.64174 | 29.9943  | 31.69237 | No  |
| No  | No  | Hb_adm>= Hb_exit<1: | 27.2062  | 27.2062  | 6.612007 | 6.612007 | No  |
| Yes |     | Hb_adm<110          | 20.85756 | 6.078996 | 11.79765 | 9.704469 | No  |
| Yes | Yes | Hb_adm<1 Hb_exit<1: | 7.288766 | 7.288766 | 8.056838 | 8.056838 | Yes |
| Yes |     | Hb_adm<110          | 11.33847 | 11.33847 | 12.02864 | 12.02864 | Yes |
| No  |     | Hb_adm>=110         | 5.453103 | 5.453103 | 14.00529 | 14.00529 | Yes |
| Yes | Yes | Hb_adm<1 Hb_exit<1: | 2.534027 | 2.534027 | 10.56823 | 10.56823 | Yes |

|     |     |                     |          |          |          |          |     |
|-----|-----|---------------------|----------|----------|----------|----------|-----|
| Yes | Yes | Hb_adm<1 Hb_exit<1: | 3.92     | 3.92     | 9.21     | 9.21     | Yes |
| No  | No  | Hb_adm>= Hb_exit<1: | 3.978064 | 3.978064 | 7.835589 | 7.835589 | Yes |
| Yes |     | Hb_adm<110          | 8.130001 | 8.130001 | 11.9415  | 11.9415  | Yes |
| Yes |     | Hb_adm<110          | 8.754049 |          | 12.81321 |          | Yes |
| Yes | Yes | Hb_adm<1 Hb_exit<1: | 1.139833 | 1.139833 | 25.6701  | 25.6701  | Yes |
| Yes |     | Hb_adm<110          | 6.731351 |          | 32.48993 |          | Yes |
| No  |     | Hb_adm>=110         | 5.50432  | 5.50432  | 7.913425 | 7.913425 | Yes |
| Yes |     | Hb_adm<110          |          |          |          |          |     |
| Yes |     | Hb_adm<110          | 47.27824 | 47.27824 | 9.088794 | 9.088794 | No  |
| No  |     | Hb_adm>=110         | 11.22597 | 11.22597 | 8.110158 | 8.110158 | Yes |
| Yes |     | Hb_adm<110          | 6.619589 | 6.619589 | 2.672576 | 2.672576 | Yes |
| No  | No  | Hb_adm>= Hb_exit<1: | 13.43221 | 13.43221 | 7.413728 | 7.413728 | No  |
| No  | No  | Hb_adm>= Hb_exit<1: | 28.76402 | 28.76402 | 6.097639 | 6.097639 | No  |
| Yes | No  | Hb_adm<1 Hb_exit<1: | 6.146217 | 6.146217 | 12.95628 | 12.95628 | Yes |
| Yes |     | Hb_adm<110          |          |          |          |          |     |
| No  | No  | Hb_adm>= Hb_exit<1: | 13.34976 | 17.96    | 12.18745 | 7.16     | No  |
| Yes |     | Hb_adm<110          | 11.40033 | 11.40033 | 7.54344  | 7.54344  | Yes |
| Yes |     | Hb_adm<110          | 11.09052 | 11.09052 | 4.759701 | 4.759701 | Yes |
| No  |     | Hb_adm>=110         | 6.253171 | 6.253171 | 9.84892  | 9.84892  | Yes |
| No  | No  | Hb_adm>= Hb_exit<1: | 30.39333 | 30.39333 | 5.992856 | 5.992856 | No  |
| Yes |     | Hb_adm<110          | 11.43038 | 11.43038 | 13.18856 | 13.18856 | Yes |
| Yes | No  | Hb_adm<1 Hb_exit<1: | 12.55    | 12.55    | 13.11    | 13.11    | No  |
| No  | No  | Hb_adm>= Hb_exit<1: | 15.37252 | 15.37252 | 8.406827 | 8.406827 | No  |
| No  |     | Hb_adm>=110         | 43.59892 | 43.59892 | 5.259551 | 5.259551 | No  |
| Yes | Yes | Hb_adm<1 Hb_exit<1: | 3.440762 | 3.440762 | 17.23298 | 17.23298 | Yes |
| Yes | Yes | Hb_adm<1 Hb_exit<1: | 13.70297 | 13.70297 | 9.28206  | 9.28206  | No  |
| Yes | Yes | Hb_adm<1 Hb_exit<1: | 106.0967 | 106.0967 | 14.64091 | 14.64091 | No  |
| No  | No  | Hb_adm>= Hb_exit<1: | 7.991663 | 7.991663 | 6.467957 | 6.467957 | Yes |
| Yes |     | Hb_adm<110          | 45.30626 | 45.30626 | 10.51584 | 10.51584 | No  |
| No  | No  | Hb_adm>= Hb_exit<1: | 31.75553 | 31.75553 | 4.930264 | 4.930264 | No  |
| Yes | Yes | Hb_adm<1 Hb_exit<1: | 1.817455 | 1.817455 | 7.636588 | 7.636588 | Yes |
| Yes | Yes | Hb_adm<1 Hb_exit<1: | 15.30782 | 44.46997 | 12.62787 | 14.46602 | No  |
| Yes | Yes | Hb_adm<1 Hb_exit<1: | 10.28423 | 10.28423 | 12.72677 | 12.72677 | Yes |
| Yes | No  | Hb_adm<1 Hb_exit<1: | 38.45992 | 38.45992 | 10.8621  | 10.8621  | No  |
| No  | No  | Hb_adm>= Hb_exit<1: | 20.85737 | 22.93575 | 6.827931 | 4.793709 | No  |
| No  | Yes | Hb_adm>= Hb_exit<1: | 4.623087 | 4.623087 | 14.85147 | 14.85147 | Yes |
| Yes | Yes | Hb_adm<1 Hb_exit<1: | 136.5287 | 136.5287 | 9.533844 | 9.533844 | No  |
| No  | Yes | Hb_adm>= Hb_exit<1: | 45.79483 | 45.79483 | 5.869466 | 5.869466 | No  |
| Yes | Yes | Hb_adm<1 Hb_exit<1: | 11.01866 | 11.01866 | 5.063785 | 5.063785 | Yes |
| Yes | No  | Hb_adm<1 Hb_exit<1: | 50.89204 | 50.89204 | 1.970697 | 1.970697 | No  |
| Yes |     | Hb_adm<110          | 17.4535  | 17.4535  | 10.33647 | 10.33647 | No  |
| Yes | No  | Hb_adm<1 Hb_exit<1: | 6.752121 | 28.53586 | 28.50279 | 14.18274 | Yes |
| Yes |     | Hb_adm<110          | 25.55734 | 25.55734 | 6.128924 | 6.128924 | No  |
| Yes | No  | Hb_adm<1 Hb_exit<1: | 4.005796 | 4.005796 | 9.875227 | 9.875227 | Yes |
| Yes | Yes | Hb_adm<1 Hb_exit<1: | 16.10465 | 16.10465 | 15.41261 | 15.41261 | No  |
| Yes |     | Hb_adm<110          | 7.260965 |          | 19.28065 |          | Yes |
| Yes | Yes | Hb_adm<1 Hb_exit<1: | 76.59867 | 76.59867 | 14.88825 | 14.88825 | No  |
| Yes | Yes | Hb_adm<1 Hb_exit<1: | 16.08238 | 16.08238 | 12.21647 | 12.21647 | No  |
| Yes |     | Hb_adm<110          | 57.49943 | 57.49943 | 5.407555 | 5.407555 | No  |
| Yes | Yes | Hb_adm<1 Hb_exit<1: | 16.13453 | 16.13453 | 21.02381 | 21.02381 | No  |
| Yes | Yes | Hb_adm<1 Hb_exit<1: | 37.6323  | 37.6323  | 4.419157 | 4.419157 | No  |

|     |     |                      |          |          |          |          |     |
|-----|-----|----------------------|----------|----------|----------|----------|-----|
| Yes | Yes | Hb_adm<1 Hb_exit<110 |          |          |          |          |     |
| No  |     | Hb_adm>=110          | 25.34    | 25.34    | 5        | 5        | No  |
| Yes | Yes | Hb_adm<1 Hb_exit<1:  | 39.37029 | 39.37029 | 7.497499 | 7.497499 | No  |
| No  |     | Hb_adm>=110          | 31.05774 | 31.05774 | 3.987114 | 3.987114 | No  |
| Yes |     | Hb_adm<110           | 59.56452 | 59.56452 | 20.39219 | 20.39219 | No  |
| Yes |     | Hb_adm<110           | 9.981011 | 9.981011 | 18.10867 | 18.10867 | Yes |
| Yes | Yes | Hb_adm<1 Hb_exit<1:  | 4.019977 | 4.019977 | 10.4783  | 10.4783  | Yes |
| Yes |     | Hb_adm<110           | 3.276144 | 3.276144 | 14.55723 | 14.55723 | Yes |
| Yes | Yes | Hb_adm<1 Hb_exit<1:  | 3.953929 | 3.953929 | 25.28351 | 25.28351 | Yes |
| No  | No  | Hb_adm>= Hb_exit<1:  | 10.27361 | 10.27361 | 5.61306  | 5.61306  | Yes |
| Yes |     | Hb_adm<110           | 18.58294 | 18.58294 | 12.83406 | 12.83406 | No  |
| Yes | Yes | Hb_adm<1 Hb_exit<1:  | 5.75917  | 5.75917  | 8.201047 | 8.201047 | Yes |
| Yes | No  | Hb_adm<1 Hb_exit<1:  | 128.5828 | 128.5828 | 6.088064 | 6.088064 | No  |
| No  |     | Hb_adm>=110          | 3.305765 | 3.305765 | 12.18509 | 12.18509 | Yes |
| No  |     | Hb_adm>=110          | 24.56507 | 24.56507 | 7.977197 | 7.977197 | No  |
| No  |     | Hb_adm>=110          | 26.47867 | 26.47867 | 6.01683  | 6.01683  | No  |
| No  | No  | Hb_adm>= Hb_exit<1:  | 111.7539 | 111.7539 | 7.760819 | 7.760819 | No  |
| No  | No  | Hb_adm>= Hb_exit<1:  | 33.64718 | 12.30827 | 5.237401 | 6.682097 | No  |
| Yes | No  | Hb_adm<1 Hb_exit<1:  | 38.56884 | 38.56884 | 6.892779 | 6.892779 | No  |
| Yes | No  | Hb_adm<1 Hb_exit<1:  | 30.22405 | 30.22405 | 7.0993   | 7.0993   | No  |
| Yes |     | Hb_adm<110           | 86.03718 | 86.03718 | 8.452925 | 8.452925 | No  |
| Yes | Yes | Hb_adm<1 Hb_exit<1:  | 76.1812  | 76.1812  | 7.572659 | 7.572659 | No  |
| Yes | Yes | Hb_adm<1 Hb_exit<1:  | 46.46756 | 46.46756 | 11.21704 | 11.21704 | No  |
| No  | No  | Hb_adm>= Hb_exit<1:  | 10.60629 | 10.60629 | 8.140059 | 8.140059 | Yes |
| No  | No  | Hb_adm>= Hb_exit<1:  | 10.92    | 10.92    | 8.1      | 8.1      | Yes |
| Yes | No  | Hb_adm<1 Hb_exit<1:  | 23.69882 | 23.69882 | 7.060594 | 7.060594 | No  |
| Yes | Yes | Hb_adm<1 Hb_exit<1:  | 17.35667 | 17.35667 | 7.888634 | 7.888634 | No  |
| Yes | No  | Hb_adm<1 Hb_exit<1:  | 6.013858 | 6.013858 | 18.06025 | 18.06025 | Yes |
| Yes | Yes | Hb_adm<1 Hb_exit<1:  | 5.527539 | 5.527539 | 19.60384 | 19.60384 | Yes |
| Yes | No  | Hb_adm<1 Hb_exit<1:  | 2.890779 | 2.890779 | 5.581626 | 5.581626 | Yes |
| Yes |     | Hb_adm<110           | 31.64871 | 31.64871 | 5.115265 | 5.115265 | No  |
| Yes | Yes | Hb_adm<1 Hb_exit<1:  | 16.1667  | 16.1667  | 4.565107 | 4.565107 | No  |
| No  | No  | Hb_adm>= Hb_exit<1:  | 38.99985 | 38.99985 | 6.784263 | 6.784263 | No  |
| Yes |     | Hb_adm<110           | 12.26427 | 12.26427 | 11.10608 | 11.10608 | No  |
| Yes |     | Hb_adm<110           | 6.069313 | 6.069313 | 7.078817 | 7.078817 | Yes |
| No  | Yes | Hb_adm>= Hb_exit<1:  | 38.47629 | 38.47629 | 4.262064 | 4.262064 | No  |
| Yes | Yes | Hb_adm<1 Hb_exit<1:  | 8.836188 | 24.91599 | 9.325016 | 6.932406 | Yes |



| ID_exit | IDAAI_adm | IDA_exit | IDAAI_exit | sTfRhigh_a | sTfRhigh_e | SF_cat_exit | SF_cat_adm         | B12_status |
|---------|-----------|----------|------------|------------|------------|-------------|--------------------|------------|
| No      | No        | No       | No         | No         | No         | SF_exit<12  | SF_adm>=12         |            |
| No      | No        | No       | No         | Yes        | Yes        | SF_exit<12  | SF_adm>=12         |            |
| No      | No        |          |            | Yes        | Yes        | SF_exit<12  | SF_adm>=12         |            |
| No      | No        | No       | No         | Yes        | Yes        | SF_exit<12  | SF_adm>= moderate  |            |
| Yes     | Yes       | No       | Yes        | Yes        | Yes        | SF_exit<12  | SF_adm>=12         |            |
|         |           |          |            |            |            |             | SF_adm>=12         |            |
| No      | No        | No       | No         | No         | No         | SF_exit<12  | SF_adm>=12         |            |
| No      | No        | No       | No         | Yes        | Yes        | SF_exit<12  | SF_adm>=12         |            |
|         | No        |          |            | No         |            |             | SF_adm>=12         |            |
| Yes     | Yes       |          |            | Yes        | Yes        | SF_exit<12  | SF_adm<12          |            |
| No      | No        | No       | No         | No         | No         | SF_exit<12  | SF_adm>=12         |            |
| Yes     | Yes       |          |            | Yes        | Yes        | SF_exit<12  | SF_adm<12          |            |
| Yes     | Yes       | No       | No         | No         | Yes        | SF_exit<12  | SF_adm<1           | moderate   |
| No      | No        | No       | No         | Yes        | No         | SF_exit<12  | SF_adm>=12         |            |
| No      | No        | No       | No         | No         | No         | SF_exit<12  | SF_adm>=12         |            |
| Yes     | Yes       | Yes      | Yes        | Yes        | Yes        | SF_exit<12  | SF_adm<12          |            |
| No      | No        |          |            | No         | No         | SF_exit<12  | SF_adm>=12         |            |
| No      | No        | No       | No         | No         | No         | SF_exit<12  | SF_adm>=12         |            |
| No      | No        |          |            | No         | No         | SF_exit<12  | SF_adm>=12         |            |
| Yes     | Yes       | Yes      | Yes        | No         | No         | SF_exit<12  | SF_adm<12          |            |
| No      | No        | No       | No         | Yes        | Yes        | SF_exit<12  | SF_adm>=12         |            |
| No      | No        | No       | No         | No         | No         | SF_exit<12  | SF_adm>= marked de |            |
| Yes     | Yes       | No       | No         | No         | No         | SF_exit<12  | SF_adm<1           | moderate   |
|         |           |          |            |            |            |             | SF_adm>=12         |            |
| No      | No        |          |            | No         | No         | SF_exit<12  | SF_adm>=12         |            |
| No      | No        | No       | No         | Yes        | Yes        | SF_exit<12  | SF_adm>= marked de |            |
| No      | No        | No       | No         | Yes        | Yes        | SF_exit<12  | SF_adm>= moderate  |            |
| Yes     | Yes       | No       | Yes        | Yes        | Yes        | SF_exit<12  | SF_adm>= adequate  |            |
| Yes     | Yes       | Yes      | Yes        | Yes        | No         | SF_exit<12  | SF_adm<1           | adequate   |
| No      | No        | No       | No         | No         | No         | SF_exit<12  | SF_adm>= marked de |            |
| Yes     | Yes       | No       | No         | Yes        | Yes        | SF_exit<12  | SF_adm<1           | marked de  |
| Yes     | Yes       |          |            | Yes        | Yes        | SF_exit<12  | SF_adm>=12         |            |
| No      | No        | No       | No         | No         | No         | SF_exit<12  | SF_adm>= adequate  |            |
| Yes     | No        | No       | No         | No         | No         | SF_exit<12  | SF_adm<1           | moderate   |
| No      | No        | No       | No         | Yes        | Yes        | SF_exit<12  | SF_adm>= marked de |            |
| No      | No        | No       | No         | No         | No         | SF_exit<12  | SF_adm>= adequate  |            |
| Yes     | No        | No       | No         | Yes        | Yes        | SF_exit<12  | SF_adm<1           | moderate   |
| No      | No        | No       | No         | No         | No         | SF_exit<12  | SF_adm>= marked de |            |
| No      | No        | No       | No         | Yes        | No         | SF_exit<12  | SF_adm>= adequate  |            |
| Yes     | Yes       | No       | No         | No         | No         | SF_exit<12  | SF_adm<1           | marked de  |
| Yes     | Yes       | Yes      | Yes        | Yes        | Yes        | SF_exit<12  | SF_adm<1           | adequate   |
| Yes     | Yes       | Yes      | Yes        | Yes        | Yes        | SF_exit<12  | SF_adm<1           | moderate   |
| Yes     | Yes       |          |            | Yes        | Yes        | SF_exit<12  | SF_adm>=12         |            |
| Yes     | Yes       |          |            | No         | No         | SF_exit<12  | SF_adm<12          |            |
| No      | No        | No       | No         | No         | No         | SF_exit<12  | SF_adm>=12         |            |
| No      | No        | No       | No         | No         | Yes        | SF_exit<12  | SF_adm>= moderate  |            |
| No      | No        |          |            | No         | No         | SF_exit<12  | SF_adm>= moderate  |            |
| No      | No        | No       | No         | No         | Yes        | SF_exit<12  | SF_adm>= moderate  |            |
| No      | No        | No       | No         | No         | No         | SF_exit<12  | SF_adm>= moderate  |            |
| No      | No        | No       | No         | No         | No         | SF_exit<12  | SF_adm>= moderate  |            |

|     |     |     |     |     |     |                               |
|-----|-----|-----|-----|-----|-----|-------------------------------|
| No  | No  | No  | No  | No  | No  | SF_exit<12 SF_adm>= marked de |
| Yes | Yes | No  | Yes | Yes | Yes | SF_exit<12 SF_adm>= marked de |
| Yes | Yes | No  | Yes | Yes | Yes | SF_exit<12 SF_adm>= moderate  |
| No  | No  | No  | No  | No  | No  | SF_exit<12 SF_adm>=12         |
| Yes | Yes | No  | No  | No  | No  | SF_exit<12 SF_adm>= marked de |
| No  | Yes | No  | No  | Yes | No  | SF_exit<12 SF_adm<1 moderate  |
| No  | No  | No  | No  | Yes | Yes | SF_exit<12 SF_adm>=12         |
| No  | No  |     |     | No  | No  | SF_exit<12 SF_adm>= adequate  |
| Yes | Yes | No  | Yes | Yes | Yes | SF_exit<12 SF_adm>=12         |
|     |     |     |     |     |     | SF_adm>=12                    |
| Yes | Yes | Yes | Yes | Yes | Yes | SF_exit<12 SF_adm<1 marked de |
| No  | No  | No  | No  | No  | No  | SF_exit<12 SF_adm>= moderate  |
| No  | No  | No  | No  | Yes | Yes | SF_exit<12 SF_adm>=12         |
| Yes | No  | No  | No  | Yes | Yes | SF_exit<12 SF_adm>= moderate  |
| Yes | Yes |     |     | Yes | Yes | SF_exit<12 SF_adm<12          |
| Yes | Yes | No  | No  | Yes | Yes | SF_exit<12 SF_adm<12          |
| Yes | Yes | Yes | Yes | Yes | Yes | SF_exit<12 SF_adm<1 moderate  |
| Yes | Yes |     |     | No  | No  | SF_exit<12 SF_adm>=12         |
| Yes | No  | No  | No  | No  | No  | SF_exit<12 SF_adm>= moderate  |
| No  | Yes | No  | No  | Yes | No  | SF_exit<12 SF_adm>= moderate  |
| No  | No  | No  | No  | No  | No  | SF_exit<12 SF_adm>= adequate  |
| No  | No  | No  | No  | No  | No  | SF_exit<12 SF_adm>= marked de |
| Yes | Yes | Yes | Yes | Yes | Yes | SF_exit<12 SF_adm<1 adequate  |
| No  | No  | No  | No  | No  | No  | SF_exit<12 SF_adm>= moderate  |
| No  | No  | No  | No  | No  | No  | SF_exit<12 SF_adm>= moderate  |
| Yes | No  |     |     | Yes | Yes | SF_exit<12 SF_adm<12          |
| No  | No  | No  | No  | Yes | Yes | SF_exit<12 SF_adm>= moderate  |
| No  | No  |     |     | Yes | Yes | SF_exit<12 SF_adm>=12         |
| Yes | Yes | No  | Yes | Yes | Yes | SF_exit<12 SF_adm>= moderate  |
| No  | No  | No  | No  | No  | No  | SF_exit<12 SF_adm>= adequate  |
|     | Yes |     |     | Yes |     | SF_adm<12                     |
|     |     |     |     |     |     | SF_adm>=12                    |
| Yes | Yes | Yes | Yes | Yes | Yes | SF_exit<12 SF_adm<12          |
|     |     |     |     |     |     | SF_adm>=12                    |
| No  | No  |     |     | Yes | Yes | SF_exit<12 SF_adm>=12         |
| Yes | Yes |     |     | Yes | Yes | SF_exit<12 SF_adm<12          |
| Yes | No  |     |     | No  | No  | SF_exit<12 SF_adm>=12         |
| No  | No  |     |     | No  | No  | SF_exit<12 SF_adm>=12         |
| No  | No  | No  | No  | Yes | Yes | SF_exit<12 SF_adm>=12         |
| No  | No  |     |     | No  | No  | SF_exit<12 SF_adm>=12         |
| Yes | Yes |     |     | Yes | Yes | SF_exit<12 SF_adm<12          |
| Yes | Yes | Yes | Yes | Yes | Yes | SF_exit<12 SF_adm<1 marked de |
| Yes | No  | No  | No  | No  | Yes | SF_exit<12 SF_adm>= marked de |
|     | Yes |     |     | Yes |     | SF_adm>=12                    |
| Yes | Yes | No  | Yes | No  | Yes | SF_exit<12 SF_adm>= moderate  |
| No  | No  | No  | No  | No  | No  | SF_exit<12 SF_adm>=12         |
| Yes | Yes |     |     | Yes | Yes | SF_exit<12 SF_adm<12          |
| Yes | Yes | No  | No  | Yes | Yes | SF_exit<12 SF_adm<1 marked de |
| Yes | Yes |     |     | Yes | Yes | SF_exit<12 SF_adm>=12         |
| No  | No  |     |     | No  | No  | SF_exit<12 SF_adm>=12         |
| No  | No  | No  | No  | No  | No  | SF_exit<12 SF_adm>= moderate  |

|     |     |     |     |     |     |                                |
|-----|-----|-----|-----|-----|-----|--------------------------------|
|     |     |     |     |     |     | SF_adm>=12                     |
| Yes | Yes | No  | No  | No  | No  | SF_exit<12 SF_adm>= moderate   |
| Yes | Yes | Yes | Yes | Yes | Yes | SF_exit<12 SF_adm<1 moderate   |
|     |     |     |     |     |     | SF_adm>=12                     |
| No  | No  | No  | No  | Yes | Yes | SF_exit<12 SF_adm>= marked de  |
| No  | No  |     |     | Yes | Yes | SF_exit<12 SF_adm>=12          |
| Yes | Yes | Yes | Yes | Yes | Yes | SF_exit<12 SF_adm<1 moderate   |
| Yes | No  | No  | No  | No  | No  | SF_exit<12 SF_adm>= moderate   |
| Yes | Yes | No  | No  | No  | No  | SF_exit<12 SF_adm<1 moderate   |
| Yes | No  |     |     | Yes | Yes | SF_exit<12 SF_adm>= moderate   |
| No  | No  | No  | No  | No  | No  | SF_exit<12 SF_adm>=12          |
| Yes | Yes | No  | Yes | No  | No  | SF_exit<12 SF_adm>= moderate   |
|     |     |     |     |     |     | SF_adm>=12                     |
| No  | No  |     |     | Yes | Yes | SF_exit<12 SF_adm>= moderate   |
| Yes | Yes |     |     | Yes | Yes | SF_exit<12 SF_adm<1 moderate   |
| Yes | Yes |     |     | No  | No  | SF_exit<12 SF_adm<12           |
| Yes | No  | No  | Yes | No  | No  | SF_exit<12 SF_adm>=12          |
| No  | No  | No  | No  | No  | No  | SF_exit<12 SF_adm>= adequate   |
| No  | No  |     |     | No  | No  | SF_exit<12 SF_adm>= moderate   |
| No  | No  |     |     | No  | No  | SF_exit<12 SF_adm>=12          |
| No  | No  | No  | No  | No  | No  | SF_exit<12 SF_adm>= marked de  |
| Yes | Yes | No  | No  | Yes | Yes | SF_exit<12 SF_adm<1 moderate   |
| No  | No  |     |     | No  | No  | SF_exit<12 SF_adm>= moderate   |
|     |     |     |     |     |     | SF_adm>=12                     |
| No  | No  | No  | No  | No  | No  | SF_exit<12 SF_adm>=12          |
| No  | No  | No  | No  | Yes | Yes | SF_exit<12 SF_adm>=12          |
| Yes | Yes |     |     | Yes | Yes | SF_exit<12 SF_adm<1 adequate   |
| No  | No  |     |     | No  | No  | SF_exit<12 SF_adm>=12          |
| No  | No  | No  | No  | No  | No  | SF_exit<12 SF_adm>= marked de  |
| No  | No  | No  | No  | No  | No  | SF_exit<12 SF_adm>= moderate   |
| No  | No  | No  | No  | No  | No  | SF_exit<12 SF_adm>=12          |
| Yes | Yes | No  | Yes | Yes | Yes | SF_exit<12 SF_adm>=12          |
| No  | No  | No  | No  | No  | No  | SF_exit<12 SF_adm>= adequate   |
| Yes | Yes | No  | No  | Yes | Yes | SF_exit<12 SF_adm<12           |
| Yes | Yes | No  | Yes | No  | No  | SF_exit<12 SF_adm>= severe def |
| No  | No  | No  | No  | Yes | Yes | SF_exit<12 SF_adm>= moderate   |
| No  | No  | No  | No  | No  | No  | SF_exit<12 SF_adm>= moderate   |
| No  | No  |     |     | No  | No  | SF_exit<12 SF_adm>=12          |
| Yes | No  | No  | No  | No  | No  | SF_exit<12 SF_adm<12           |
| Yes | Yes |     |     | Yes | Yes | SF_exit<12 SF_adm>=12          |
| No  | No  | No  | No  | No  | No  | SF_exit<12 SF_adm>= marked de  |
| No  | No  | No  | No  | Yes | Yes | SF_exit<12 SF_adm>= marked de  |
| No  | No  | No  | No  | No  | No  | SF_exit<12 SF_adm>= adequate   |
| Yes | Yes |     |     | Yes | Yes | SF_exit<12 SF_adm<12           |
| No  | No  |     |     | No  | No  | SF_exit<12 SF_adm>=12          |
| No  | No  | No  | No  | Yes | Yes | SF_exit<12 SF_adm>= marked de  |
| No  | No  | No  | No  | Yes | Yes | SF_exit<12 SF_adm>= adequate   |
| No  | No  | No  | No  | No  | No  | SF_exit<12 SF_adm>=12          |
| Yes | Yes | Yes | Yes | Yes | Yes | SF_exit<12 SF_adm<12           |
| No  | No  |     |     | No  | No  | SF_exit<12 SF_adm>=12          |

SF\_adm>=12

|     |     |     |     |     |     |                                                   |
|-----|-----|-----|-----|-----|-----|---------------------------------------------------|
| No  | No  | No  | No  | Yes | Yes | SF_exit<12 SF_adm>=12<br>SF_adm>=12<br>SF_adm>=12 |
| No  | No  |     |     | Yes | Yes | SF_exit<12 SF_adm>=12<br>SF_adm>=12<br>SF_adm>=12 |
| Yes | Yes | No  | Yes | Yes | Yes | SF_exit<12 SF_adm>=12                             |
| Yes | Yes | Yes | Yes | No  | No  | SF_exit<12 SF_adm<12                              |
| No  | No  | No  | No  | No  | No  | SF_exit<12 SF_adm>=12<br>SF_adm>=12               |
| No  | No  | No  | No  | Yes | Yes | SF_exit<12 SF_adm>=12                             |
| Yes | Yes |     |     | Yes | Yes | SF_exit<12 SF_adm<12                              |
| No  | No  |     |     | No  | No  | SF_exit<12 SF_adm>=12                             |
| Yes | Yes |     |     | Yes | Yes | SF_exit<12 SF_adm<12                              |
| Yes | Yes |     |     | Yes | Yes | SF_exit<12 SF_adm>=12                             |
| Yes | Yes |     |     | Yes | Yes | SF_exit<12 SF_adm<12                              |
| Yes | Yes | No  | No  | No  | No  | SF_exit<12 SF_adm<12                              |
| No  | No  | No  | No  | No  | No  | SF_exit<12 SF_adm>=12                             |
| No  | No  | No  | No  | Yes | Yes | SF_exit<12 SF_adm>=12                             |
| No  | No  | No  | No  | No  | No  | SF_exit<12 SF_adm>=12                             |
| No  | No  | No  | No  | No  | No  | SF_exit<12 SF_adm>=12                             |
| No  | No  | No  | No  | No  | No  | SF_exit<12 SF_adm>=12                             |
| Yes | Yes | No  | No  | No  | No  | SF_exit<12 SF_adm>=12                             |
| No  | No  | No  | No  | Yes | Yes | SF_exit<12 SF_adm>=12                             |
| No  | No  | No  | No  | Yes | Yes | SF_exit<12 SF_adm>=12                             |
| Yes | Yes | Yes | Yes | Yes | Yes | SF_exit<12 SF_adm<1 marked de                     |
| No  | No  | No  | No  | No  | No  | SF_exit<12 SF_adm>=12                             |
| Yes | Yes | Yes | Yes | Yes | Yes | SF_exit<12 SF_adm<12                              |
| No  | No  |     |     | No  | No  | SF_exit<12 SF_adm>=12<br>SF_adm>=12               |
| Yes | Yes | No  | No  | No  | No  | SF_exit<12 SF_adm>=12                             |
| Yes | Yes |     |     | Yes | Yes | SF_exit<12 SF_adm>=12                             |
| No  | No  | No  | No  | No  | No  | SF_exit<12 SF_adm>= marked de<br>SF_adm>=12       |
| No  | No  |     |     | Yes | Yes | SF_exit<12 SF_adm>=12                             |
| Yes | Yes | No  | Yes | Yes | Yes | SF_exit<12 SF_adm>= marked de                     |
| No  | No  |     |     | Yes | Yes | SF_exit<12 SF_adm>=12                             |
| No  | No  | No  | No  | Yes | Yes | SF_exit<12 SF_adm>=12                             |
| No  | No  | No  | No  | Yes | Yes | SF_exit<12 SF_adm>= moderate                      |
| No  | No  | No  | No  | Yes | Yes | SF_exit<12 SF_adm>= moderate                      |
| No  | No  |     |     | Yes | Yes | SF_exit<12 SF_adm>=12                             |
| No  | No  | No  | No  | Yes | Yes | SF_exit<12 SF_adm>= marked de                     |
| No  | No  | No  | No  | Yes | Yes | SF_exit<12 SF_adm>= marked de                     |
| No  | No  |     |     | No  | No  | SF_exit<12 SF_adm>=12                             |
| Yes | Yes | No  | Yes | Yes | Yes | SF_exit<12 SF_adm>= moderate                      |
| Yes | Yes |     |     | Yes | Yes | SF_exit<12 SF_adm<12                              |
| No  | No  | No  | No  | Yes | Yes | SF_exit<12 SF_adm>= moderate                      |
| No  | No  |     |     | Yes | Yes | SF_exit<12 SF_adm>=12                             |
| No  | No  |     |     | Yes | Yes | SF_exit<12 SF_adm>=12                             |
| No  | No  | No  | No  | Yes | Yes | SF_exit<12 SF_adm>= moderate                      |
| No  | No  |     |     | No  | No  | SF_exit<12 SF_adm>=12                             |

|     |     |     |     |     |     |                                              |
|-----|-----|-----|-----|-----|-----|----------------------------------------------|
| Yes | Yes |     |     | Yes | Yes | SF_exit<12 SF_adm<1 moderate                 |
| No  | No  | No  | No  | Yes | Yes | SF_exit<12 SF_adm>= moderate                 |
| No  | No  |     |     | No  | No  | SF_exit<12 SF_adm>=12                        |
| No  | No  |     |     | Yes | Yes | SF_exit<12 SF_adm>= moderate                 |
| Yes | No  |     |     | No  | Yes | SF_exit<12 SF_adm>= marked de                |
| Yes | Yes |     |     | No  | No  | SF_exit<12 SF_adm>= moderate                 |
| No  | No  | No  | No  | No  | No  | SF_exit<12 SF_adm>= severe def<br>SF_adm>=12 |
| Yes | Yes | No  | Yes | No  | No  | SF_exit<12 SF_adm>=12                        |
| No  | No  | No  | No  | No  | No  | SF_exit<12 SF_adm>= moderate                 |
| No  | No  | No  | No  | Yes | Yes | SF_exit<12 SF_adm>=12<br>SF_adm>=12          |
| No  | No  | No  | No  | No  | No  | SF_exit<12 SF_adm>=12<br>SF_adm>=12          |
| No  | No  | No  | No  | Yes | Yes | SF_exit<12 SF_adm>=12                        |
| Yes | Yes | Yes | Yes | No  | No  | SF_exit<12 SF_adm<12                         |
| No  | No  | No  | No  | Yes | No  | SF_exit<12 SF_adm>= moderate                 |
| No  | No  | No  | No  | No  | No  | SF_exit<12 SF_adm>=12<br>SF_adm>=12          |
| Yes | Yes | No  | No  | Yes | Yes | SF_exit<12 SF_adm<12                         |
| No  | No  |     |     | No  | No  | SF_exit<12 SF_adm>=12<br>SF_adm>=12          |
| Yes | Yes | Yes | Yes | Yes | Yes | SF_exit<12 SF_adm<12<br>SF_adm>=12           |
| No  | No  | No  | No  | Yes | Yes | SF_exit<12 SF_adm>=12                        |
| Yes | Yes |     |     | Yes | Yes | SF_exit<12 SF_adm>=12                        |
| No  | No  | No  | No  | No  | No  | SF_exit<12 SF_adm>=12                        |
| No  | No  |     |     | No  | No  | SF_exit<12 SF_adm>=12                        |
| No  | No  | No  | No  | No  | No  | SF_exit<12 SF_adm>=12                        |
| No  | Yes | No  | No  | Yes | No  | SF_exit<12 SF_adm<12                         |
| No  | No  |     |     | Yes | Yes | SF_exit<12 SF_adm>=12                        |
| No  | No  | No  | No  | No  | No  | SF_exit<12 SF_adm>=12                        |
| Yes | Yes | No  | No  | No  | No  | SF_exit<12 SF_adm>=12                        |
| No  | No  | No  | No  | No  | No  | SF_exit<12 SF_adm>=12                        |
| No  | No  | No  | No  | Yes | Yes | SF_exit<12 SF_adm>=12<br>SF_adm>=12          |
| Yes | Yes | No  | No  | Yes | Yes | SF_exit<12 SF_adm<12                         |
| No  | No  | No  | No  | No  | No  | SF_exit<12 SF_adm>=12                        |
| No  | No  | No  | No  | No  | No  | SF_exit<12 SF_adm>=12                        |
| No  | No  | No  | No  | No  | No  | SF_exit<12 SF_adm>=12                        |
| No  | No  | No  | No  | Yes | Yes | SF_exit<12 SF_adm>=12<br>SF_adm>=12          |
| Yes | Yes | No  | No  | Yes | Yes | SF_exit<12 SF_adm<12                         |
| No  | No  | No  | No  | No  | No  | SF_exit<12 SF_adm>=12                        |
| No  | No  | No  | No  | No  | No  | SF_exit<12 SF_adm>=12                        |
| Yes | No  |     |     | Yes | Yes | SF_exit<12 SF_adm>=12                        |
| No  | No  | No  | No  | No  | No  | SF_exit<12 SF_adm>=12                        |
| Yes | Yes | No  | Yes | No  | No  | SF_exit<12 SF_adm>=12                        |
| Yes | Yes | No  | No  | Yes | Yes | SF_exit<12 SF_adm<12                         |
| No  | No  |     |     | No  | No  | SF_exit<12 SF_adm>=12                        |
| No  | No  |     |     | No  | No  | SF_exit<12 SF_adm>=12                        |
|     | Yes |     |     | Yes |     | SF_adm<12                                    |
| No  | No  | No  | No  | No  | No  | SF_exit<12 SF_adm>= moderate                 |
| Yes | No  | No  | No  | Yes | Yes | SF_exit<12 SF_adm<12                         |
| No  | No  | No  | No  | Yes | Yes | SF_exit<12 SF_adm>= severe def               |
| Yes | Yes | Yes | Yes | Yes | Yes | SF_exit<12 SF_adm<12                         |
| No  | No  | No  | No  | No  | No  | SF_exit<12 SF_adm>=12                        |

|     |     |     |     |     |     |                               |
|-----|-----|-----|-----|-----|-----|-------------------------------|
|     |     |     |     |     |     | SF_adm>=12                    |
| No  | No  | No  | No  | No  | No  | SF_exit<12 SF_adm>= moderate  |
| No  | No  |     |     | No  | No  | SF_exit<12 SF_adm>=12         |
| Yes | Yes | Yes | Yes | Yes | Yes | SF_exit<12 SF_adm<1 marked de |
| Yes | Yes |     |     | Yes | Yes | SF_exit<12 SF_adm>=12         |
| Yes | No  |     |     | No  | No  | SF_exit<12 SF_adm>=12         |
| Yes | Yes | Yes | Yes | No  | No  | SF_exit<12 SF_adm<12          |
| No  | No  | No  | No  | Yes | No  | SF_exit<12 SF_adm>= moderate  |
| Yes | Yes |     |     | Yes | Yes | SF_exit<12 SF_adm<1 adequate  |
| Yes | Yes | No  | Yes | Yes | Yes | SF_exit<12 SF_adm>=12         |
| Yes | Yes | Yes | Yes | No  | No  | SF_exit<12 SF_adm<1 marked de |
| Yes | Yes | No  | No  | Yes | Yes | SF_exit<12 SF_adm<1 adequate  |
| Yes | Yes | Yes | Yes | Yes | Yes | SF_exit<12 SF_adm<1 marked de |
| No  | No  | No  | No  | No  | No  | SF_exit<12 SF_adm>= moderate  |
| No  | No  | No  | No  | No  | No  | SF_exit<12 SF_adm>= moderate  |
| Yes | Yes | No  | Yes | No  | No  | SF_exit<12 SF_adm>=12         |
| No  | No  | No  | No  | No  | No  | SF_exit<12 SF_adm>= marked de |
| No  | No  |     |     | Yes | Yes | SF_exit<12 SF_adm>= moderate  |
| Yes | Yes | Yes | Yes | No  | No  | SF_exit<12 SF_adm<1 moderate  |
| No  | No  | No  | No  | Yes | Yes | SF_exit<12 SF_adm>= moderate  |
| No  | No  | No  | No  | No  | No  | SF_exit<12 SF_adm>= moderate  |
| No  | No  | No  | No  | No  | No  | SF_exit<12 SF_adm>=12         |
| No  | No  | No  | No  | No  | No  | SF_exit<12 SF_adm>= moderate  |
| Yes | Yes | No  | No  | Yes | Yes | SF_exit<12 SF_adm<1 marked de |
| Yes | Yes |     |     | Yes | Yes | SF_exit<12 SF_adm>= moderate  |
| No  | No  | No  | No  | No  | No  | SF_exit<12 SF_adm>= moderate  |
| No  | No  | No  | No  | No  | No  | SF_exit<12 SF_adm>= marked de |
| No  | No  | No  | No  | Yes | Yes | SF_exit<12 SF_adm>=12         |
| No  | No  | No  | No  | Yes | Yes | SF_exit<12 SF_adm>=12         |
| No  | No  |     |     | No  | No  | SF_exit<12 SF_adm>= moderate  |
| Yes | Yes | No  | No  | No  | No  | SF_exit<12 SF_adm>= moderate  |
| No  | No  | No  | No  | Yes | Yes | SF_exit<12 SF_adm>= marked de |
| No  | No  | No  | No  | Yes | Yes | SF_exit<12 SF_adm>= marked de |
| No  | No  |     |     | Yes | Yes | SF_exit<12 SF_adm>= moderate  |
| No  | No  | No  | No  | Yes | Yes | SF_exit<12 SF_adm>= moderate  |
| No  | No  | No  | No  | Yes | Yes | SF_exit<12 SF_adm>= marked de |
| No  | No  | No  | No  | Yes | Yes | SF_exit<12 SF_adm>= moderate  |
| No  | No  | No  | No  | No  | No  | SF_exit<12 SF_adm>= moderate  |
|     |     |     |     |     |     | SF_adm>=12                    |
| No  | No  | No  | No  | No  | No  | SF_exit<12 SF_adm>= adequate  |
| No  | No  | No  | No  | No  | Yes | SF_exit<12 SF_adm>= adequate  |
| Yes | Yes | No  | Yes | Yes | Yes | SF_exit<12 SF_adm>= moderate  |
| Yes | Yes | No  | No  | Yes | Yes | SF_exit<12 SF_adm<1 moderate  |
| No  | No  |     |     | Yes | Yes | SF_exit<12 SF_adm>=12         |
| No  | No  | No  | No  | Yes | Yes | SF_exit<12 SF_adm>= marked de |
| No  | No  | No  | No  | Yes | Yes | SF_exit<12 SF_adm>= moderate  |
| Yes | Yes | No  | No  | Yes | Yes | SF_exit<12 SF_adm<1 moderate  |
| No  | No  | No  | No  | No  | No  | SF_exit<12 SF_adm>= moderate  |
| No  | No  | No  | No  | Yes | Yes | SF_exit<12 SF_adm>=12         |
| Yes | Yes | No  | Yes | Yes | Yes | SF_exit<12 SF_adm>= moderate  |
| Yes | Yes | No  | Yes | Yes | Yes | SF_exit<12 SF_adm>= moderate  |

|     |     |     |     |     |     |                                                           |
|-----|-----|-----|-----|-----|-----|-----------------------------------------------------------|
| Yes | Yes | Yes | Yes | Yes | Yes | SF_exit<12 SF_adm<1 marked de<br>SF_adm>=12               |
| Yes | Yes | Yes | Yes | Yes | Yes | SF_exit<12 SF_adm<12                                      |
| No  | No  |     |     | No  | No  | SF_exit<12 SF_adm>= moderate                              |
| Yes | No  | No  | No  | No  | No  | SF_exit<12 SF_adm>= marked de                             |
| Yes | Yes |     |     | Yes | Yes | SF_exit<12 SF_adm>=12                                     |
| Yes | Yes | No  | No  | No  | No  | SF_exit<12 SF_adm>= marked de                             |
| No  | No  | No  | No  | No  | No  | SF_exit<12 SF_adm>= moderate                              |
| Yes | Yes | No  | Yes | Yes | Yes | SF_exit<12 SF_adm>= severe def                            |
| No  | No  | No  | No  | No  | No  | SF_exit<12 SF_adm>= moderate                              |
| No  | No  | No  | No  | No  | No  | SF_exit<12 SF_adm>= moderate                              |
| No  | No  | No  | No  | Yes | Yes | SF_exit<12 SF_adm>= moderate                              |
| Yes | Yes |     |     | Yes | Yes | SF_exit<12 SF_adm<1 moderate                              |
| No  | No  |     |     | Yes | Yes | SF_exit<12 SF_adm>= moderate                              |
| Yes | Yes | No  | No  | No  | No  | SF_exit<12 SF_adm>= moderate                              |
| Yes | Yes | No  | Yes | Yes | Yes | SF_exit<12 SF_adm>= marked de                             |
| Yes | Yes | No  | Yes | Yes | Yes | SF_exit<12 SF_adm>=12                                     |
| Yes | Yes | No  | No  | Yes | Yes | SF_exit<12 SF_adm<12                                      |
| Yes | Yes | No  | No  | Yes | Yes | SF_exit<12 SF_adm<1 severe def<br>SF_adm<12<br>SF_adm>=12 |
| Yes | Yes | No  | Yes | No  | No  | SF_exit<12 SF_adm>= adequate                              |
| No  | No  | No  | No  | No  | No  | SF_exit<12 SF_adm>= moderate                              |
| No  | No  |     |     | Yes | Yes | SF_exit<12 SF_adm>=12                                     |
| No  | No  | No  | No  | No  | No  | SF_exit<12 SF_adm>= moderate                              |
| Yes | Yes | No  | Yes | Yes | Yes | SF_exit<12 SF_adm>= marked de                             |
| Yes | Yes | No  | Yes | No  | No  | SF_exit<12 SF_adm>=12                                     |
| No  | No  | No  | No  | No  | No  | SF_exit<12 SF_adm>=12                                     |
| No  | No  | No  | No  | No  | No  | SF_exit<12 SF_adm>=12                                     |
| No  | No  | No  | No  | No  | No  | SF_exit<12 SF_adm>=12                                     |
| Yes | Yes | No  | No  | Yes | Yes | SF_exit<12 SF_adm<12                                      |
| No  | No  |     |     | No  | No  | SF_exit<12 SF_adm>=12                                     |
| No  | No  | No  | No  | Yes | Yes | SF_exit<12 SF_adm>=12                                     |
| Yes | Yes | No  | Yes | Yes | Yes | SF_exit<12 SF_adm>=12                                     |
| Yes | Yes | Yes | Yes | Yes | Yes | SF_exit<12 SF_adm<12                                      |
| No  | No  | No  | No  | No  | No  | SF_exit<12 SF_adm>=12                                     |
| No  | No  | No  | No  | Yes | Yes | SF_exit<12 SF_adm>=12                                     |
| No  | No  | No  | No  | Yes | Yes | SF_exit<12 SF_adm>=12                                     |
| No  | No  | No  | No  | No  | No  | SF_exit<12 SF_adm>=12                                     |
| Yes | No  |     |     | No  | No  | SF_exit<12 SF_adm>=12                                     |
| Yes | Yes |     |     | Yes | Yes | SF_exit<12 SF_adm>=12                                     |
| Yes | No  | Yes | Yes | Yes | Yes | SF_exit<12 SF_adm<1 marked de                             |
| Yes | Yes | Yes | Yes | Yes | Yes | SF_exit<12 SF_adm<1 moderate                              |
| No  | No  |     |     | No  | No  | SF_exit<12 SF_adm>=12                                     |
| No  | No  | No  | No  | No  | No  | SF_exit<12 SF_adm>= severe def                            |
| No  | No  |     |     | No  | No  | SF_exit<12 SF_adm>=12                                     |
| No  | No  | No  | No  | Yes | Yes | SF_exit<12 SF_adm>= adequate                              |
| Yes | Yes | No  | Yes | Yes | Yes | SF_exit<12 SF_adm>=12                                     |
| Yes | Yes | Yes | Yes | Yes | Yes | SF_exit<12 SF_adm<1 marked de                             |
| Yes | Yes | No  | No  | Yes | Yes | SF_exit<12 SF_adm<1 moderate                              |
| Yes | Yes | Yes | Yes | Yes | Yes | SF_exit<12 SF_adm<1 adequate                              |

|     |     |     |     |     |     |                                            |
|-----|-----|-----|-----|-----|-----|--------------------------------------------|
| Yes | Yes |     |     | Yes | Yes | SF_exit<12 SF_adm>=12                      |
| No  | No  | No  | No  | Yes | Yes | SF_exit<12 SF_adm>= moderate               |
| No  | No  | No  | No  | Yes | Yes | SF_exit<12 SF_adm>=12                      |
| No  | Yes | No  | No  | No  | No  | SF_exit<12 SF_adm>= moderate<br>SF_adm>=12 |
| Yes | Yes | Yes | Yes | Yes | Yes | SF_exit<12 SF_adm<1 moderate               |
| No  | No  |     |     | Yes | Yes | SF_exit<12 SF_adm>=12                      |
| No  | No  |     |     | Yes | Yes | SF_exit<12 SF_adm>=12                      |
| Yes | Yes | Yes | Yes | Yes | Yes | SF_exit<12 SF_adm<1 severe def             |
| No  | No  |     |     | Yes | Yes | SF_exit<12 SF_adm>= severe def             |
| No  | No  | No  | No  | Yes | Yes | SF_exit<12 SF_adm>= moderate               |
| No  | No  | No  | No  | No  | No  | SF_exit<12 SF_adm>= moderate               |
| No  | No  | No  | No  | Yes | Yes | SF_exit<12 SF_adm>= marked de              |
| No  | No  | No  | No  | No  | No  | SF_exit<12 SF_adm>= marked de              |
| Yes | Yes | No  | No  | No  | No  | SF_exit<12 SF_adm>= moderate               |
| Yes | No  |     |     | No  | No  | SF_exit<12 SF_adm<12                       |
| Yes | Yes | No  | Yes | Yes | Yes | SF_exit<12 SF_adm>=12                      |
| Yes | Yes | Yes | Yes | Yes | Yes | SF_exit<12 SF_adm<1 moderate               |
| No  | No  | No  | No  | No  | No  | SF_exit<12 SF_adm>= moderate               |
| Yes | Yes | No  | No  | Yes | Yes | SF_exit<12 SF_adm<1 moderate               |
| No  | No  | No  | No  | Yes | Yes | SF_exit<12 SF_adm>=12                      |
| No  | No  |     |     | Yes | Yes | SF_exit<12 SF_adm>=12                      |
| Yes | Yes | No  | No  | No  | No  | SF_exit<12 SF_adm<12                       |
| No  | No  | No  | No  | No  | No  | SF_exit<12 SF_adm>=12                      |
| Yes | Yes | No  | No  | Yes | Yes | SF_exit<12 SF_adm<12                       |
| Yes | No  | No  | Yes | No  | No  | SF_exit<12 SF_adm>= moderate               |
| Yes | Yes | Yes | Yes | Yes | Yes | SF_exit<12 SF_adm<1 marked de              |
| No  | No  | No  | No  | Yes | Yes | SF_exit<12 SF_adm>=12                      |
| Yes | Yes | Yes | Yes | Yes | Yes | SF_exit<12 SF_adm<1 moderate               |
| No  | No  | No  | No  | No  | No  | SF_exit<12 SF_adm>=12                      |
| Yes | Yes | No  | Yes | Yes | Yes | SF_exit<12 SF_adm>= adequate               |
| No  | No  |     |     | No  | No  | SF_exit<12 SF_adm>= marked de              |
| No  | No  |     |     | Yes | Yes | SF_exit<12 SF_adm>=12                      |
| No  | No  | No  | No  | No  | No  | SF_exit<12 SF_adm>=12                      |
| No  | No  | No  | No  | Yes | Yes | SF_exit<12 SF_adm>=12                      |
| No  | No  | No  | No  | No  | No  | SF_exit<12 SF_adm>=12<br>SF_adm>=12        |
| No  | No  | No  | No  | Yes | Yes | SF_exit<12 SF_adm>=12                      |
| No  | No  | No  | No  | No  | No  | SF_exit<12 SF_adm>=12                      |
| No  | No  | No  | No  | No  | No  | SF_exit<12 SF_adm>=12                      |
| No  | No  | No  | No  | Yes | Yes | SF_exit<12 SF_adm>=12                      |
| No  | No  | No  | No  | No  | No  | SF_exit<12 SF_adm>=12<br>SF_adm>=12        |
| No  | No  |     |     | Yes | Yes | SF_exit<12 SF_adm>=12                      |
| No  | No  |     |     | No  | No  | SF_exit<12 SF_adm>=12                      |
| Yes | Yes | Yes | Yes | Yes | Yes | SF_exit<12 SF_adm<12                       |
| No  | No  |     |     | No  | No  | SF_exit<12 SF_adm>=12                      |
| No  | No  | No  | No  | No  | No  | SF_exit<12 SF_adm>=12                      |
| No  | No  | No  | No  | Yes | Yes | SF_exit<12 SF_adm>= moderate               |
| Yes | Yes |     |     | Yes | Yes | SF_exit<12 SF_adm>=12<br>SF_adm>=12        |



|     |     |     |     |     |     |                                |
|-----|-----|-----|-----|-----|-----|--------------------------------|
| No  | No  | No  | No  | No  | No  | SF_exit<12 SF_adm>=12          |
| No  | No  | No  | No  | No  | No  | SF_exit<12 SF_adm>= moderate   |
| No  | No  | No  | No  | No  | No  | SF_exit<12 SF_adm>= moderate   |
| Yes | Yes | Yes | Yes | Yes | Yes | SF_exit<12 SF_adm<1 moderate   |
| No  | No  | No  | No  | No  | No  | SF_exit<12 SF_adm>=12          |
| Yes | No  | No  | No  | No  | No  | SF_exit<12 SF_adm<12           |
| No  | No  | No  | No  | No  | No  | SF_exit<12 SF_adm>=12          |
| Yes | No  | No  | No  | Yes | Yes | SF_exit<12 SF_adm>=12          |
| No  | No  | No  | No  | No  | No  | SF_exit<12 SF_adm>= marked de  |
| No  | No  | No  | No  | Yes | Yes | SF_exit<12 SF_adm>= marked de  |
| Yes | No  | No  | Yes | Yes | Yes | SF_exit<12 SF_adm>= moderate   |
| No  | No  | No  | No  | No  | No  | SF_exit<12 SF_adm>= moderate   |
| No  | No  | No  | No  | Yes | Yes | SF_exit<12 SF_adm>= marked de  |
|     | No  |     |     | Yes |     | SF_adm>=12                     |
| No  | No  | No  | No  | Yes | Yes | SF_exit<12 SF_adm>= moderate   |
| No  | No  |     |     | Yes | Yes | SF_exit<12 SF_adm>= moderate   |
| No  | No  | No  | No  | Yes | Yes | SF_exit<12 SF_adm>= moderate   |
| No  | No  |     |     | No  | No  | SF_exit<12 SF_adm>=12          |
| Yes | Yes | No  | No  | No  | No  | SF_exit<12 SF_adm<1 adequate   |
| No  | No  |     |     | Yes | Yes | SF_exit<12 SF_adm>=12          |
| Yes | No  |     |     | No  | No  | SF_exit<12 SF_adm>= moderate   |
| Yes | Yes | No  | No  | Yes | Yes | SF_exit<12 SF_adm<1 severe def |
| No  | No  | No  | No  | No  | No  | SF_exit<12 SF_adm>= marked de  |
| No  | No  | No  | No  | No  | No  | SF_exit<12 SF_adm>= moderate   |
| No  | No  | No  | No  | No  | No  | SF_exit<12 SF_adm>= moderate   |
| No  | No  |     |     | No  | No  | SF_exit<12 SF_adm>=12          |
| No  | No  | No  | No  | No  | No  | SF_exit<12 SF_adm>= moderate   |
| Yes | Yes | No  | No  | No  | No  | SF_exit<12 SF_adm<12           |
| No  | No  | No  | No  | Yes | Yes | SF_exit<12 SF_adm>=12          |
| Yes | No  | No  | Yes | Yes | Yes | SF_exit<12 SF_adm>=12          |
| Yes | Yes | No  | No  | Yes | Yes | SF_exit<12 SF_adm<12           |
| Yes | Yes | No  | No  | No  | No  | SF_exit<12 SF_adm<1 adequate   |
| Yes | Yes | No  | No  | No  | No  | SF_exit<12 SF_adm<1 severe def |
| No  | No  | No  | No  | No  | No  | SF_exit<12 SF_adm>= marked de  |
| No  | No  | No  | No  | No  | No  | SF_exit<12 SF_adm>=12          |
| No  | No  | No  | No  | No  | No  | SF_exit<12 SF_adm>= moderate   |
| Yes | Yes |     |     | Yes | Yes | SF_exit<12 SF_adm<12           |
|     |     |     |     |     |     | SF_adm>=12                     |
| No  | No  |     |     | No  | No  | SF_exit<12 SF_adm>=12          |
| No  | No  | No  | No  | No  | No  | SF_exit<12 SF_adm>=12          |
| No  | No  | No  | No  | No  | No  | SF_exit<12 SF_adm>= marked de  |
| No  | No  | No  | No  | No  | No  | SF_exit<12 SF_adm>=12          |
| No  | No  |     |     | No  | No  | SF_exit<12 SF_adm>=12          |
| No  | No  | No  | No  | No  | No  | SF_exit<12 SF_adm>=12          |
| Yes | Yes | No  | No  | Yes | Yes | SF_exit<12 SF_adm>= moderate   |
| Yes | Yes |     |     | Yes | Yes | SF_exit<12 SF_adm<12           |
| No  | No  |     |     | No  | No  | SF_exit<12 SF_adm>=12          |
|     |     |     |     |     |     | SF_adm>=12                     |
| Yes | Yes |     |     | No  | No  | SF_exit<12 SF_adm<12           |
| No  | No  | No  | No  | No  | No  | SF_exit<12 SF_adm>=12          |
| Yes | No  |     |     | No  | No  | SF_exit<12 SF_adm<12           |

|     |     |     |     |     |     |                                            |
|-----|-----|-----|-----|-----|-----|--------------------------------------------|
| No  | No  | No  | No  | No  | No  | SF_exit<12 SF_adm>=12                      |
| Yes | Yes |     |     | No  | No  | SF_exit<12 SF_adm>=12                      |
| Yes | No  |     |     | No  | No  | SF_exit<12 SF_adm>=12                      |
| Yes | Yes |     |     | Yes | Yes | SF_exit<12 SF_adm<12                       |
| No  | No  | No  | No  | No  | No  | SF_exit<12 SF_adm>= adequate<br>SF_adm>=12 |
| No  | No  | No  | No  | No  | No  | SF_exit<12 SF_adm>=12                      |
| Yes | No  |     |     | No  | No  | SF_exit<12 SF_adm>=12                      |
| Yes | Yes | Yes | Yes | No  | No  | SF_exit<12 SF_adm<1 moderate               |
| Yes | Yes | Yes | Yes | Yes | Yes | SF_exit<12 SF_adm<1 moderate               |
| No  | No  | No  | No  | Yes | Yes | SF_exit<12 SF_adm>= moderate               |
| Yes | Yes |     |     | Yes | Yes | SF_exit<12 SF_adm>=12                      |
| No  | No  |     |     | No  | No  | SF_exit<12 SF_adm>=12                      |
| Yes | Yes | No  | No  | No  | No  | SF_exit<12 SF_adm>= marked de              |
| No  | No  | No  | No  | No  | No  | SF_exit<12 SF_adm>=12                      |
| No  | No  | No  | No  | No  | No  | SF_exit<12 SF_adm>=12                      |
| No  | No  |     |     | Yes | Yes | SF_exit<12 SF_adm>=12                      |
| No  | No  | No  | No  | No  | No  | SF_exit<12 SF_adm>= marked de              |
| Yes | Yes | No  | No  | Yes | Yes | SF_exit<12 SF_adm>= severe def             |
| No  | No  | No  | No  | Yes | Yes | SF_exit<12 SF_adm>= moderate               |
| Yes | No  | No  | No  | Yes | Yes | SF_exit<12 SF_adm<12                       |
| No  | No  |     |     | Yes | Yes | SF_exit<12 SF_adm>=12                      |
| Yes | No  |     |     | Yes | Yes | SF_exit<12 SF_adm<1 moderate               |
| No  | No  | No  | No  | No  | No  | SF_exit<12 SF_adm>= moderate               |
| Yes | Yes |     |     | No  | No  | SF_exit<12 SF_adm>=12                      |
| No  | No  |     |     | No  | No  | SF_exit<12 SF_adm>=12                      |
| Yes | No  | No  | No  | Yes | Yes | SF_exit<12 SF_adm>=12                      |
| Yes | Yes | Yes | Yes | No  | No  | SF_exit<12 SF_adm<1 severe def             |
| No  | No  | No  | No  | Yes | Yes | SF_exit<12 SF_adm>= moderate               |
| No  | No  | No  | No  | Yes | Yes | SF_exit<12 SF_adm>= adequate               |
| Yes | No  | No  | No  | Yes | Yes | SF_exit<12 SF_adm>= adequate               |
| Yes | No  |     |     | No  | No  | SF_exit<12 SF_adm>= adequate               |
| No  | No  | No  | No  | No  | No  | SF_exit<12 SF_adm>=12                      |
|     | No  |     |     | Yes |     | SF_adm>=12                                 |
| Yes | Yes |     |     | Yes | Yes | SF_exit<12 SF_adm<12                       |
| No  | No  |     |     | Yes | Yes | SF_exit<12 SF_adm>=12                      |
| No  | No  | No  | No  | No  | No  | SF_exit<12 SF_adm>= moderate               |
| No  | No  | No  | No  | No  | No  | SF_exit<12 SF_adm>= moderate               |
| No  | No  |     |     | Yes | Yes | SF_exit<12 SF_adm>=12                      |
| No  | No  |     |     | No  | No  | SF_exit<12 SF_adm>= adequate               |
| No  | No  |     |     | No  | No  | SF_exit<12 SF_adm>=12                      |
| No  | Yes | No  | No  | Yes | No  | SF_exit<12 SF_adm>= moderate               |
| No  | No  |     |     | No  | No  | SF_exit<12 SF_adm>=12                      |
| Yes | No  |     |     | No  | No  | SF_exit<12 SF_adm>=12                      |
| Yes | No  |     |     | No  | No  | SF_exit<12 SF_adm<12                       |
| Yes | Yes |     |     | No  | No  | SF_exit<12 SF_adm<12                       |
| Yes | No  | No  | No  | Yes | Yes | SF_exit<12 SF_adm<1 moderate               |
| No  | No  | No  | No  | No  | No  | SF_exit<12 SF_adm>= moderate               |
| Yes | Yes | No  | Yes | No  | No  | SF_exit<12 SF_adm>= moderate               |
| Yes | Yes |     |     | No  | No  | SF_exit<12 SF_adm>= moderate               |
| No  | No  |     |     | No  | No  | SF_exit<12 SF_adm>= moderate               |

|     |     |     |     |     |     |                                |
|-----|-----|-----|-----|-----|-----|--------------------------------|
| Yes | Yes | No  | Yes | No  | No  | SF_exit<12 SF_adm>= moderate   |
| Yes | Yes |     |     | Yes | Yes | SF_exit<12 SF_adm>=12          |
| No  | No  |     |     | No  | No  | SF_exit<12 SF_adm>=12          |
|     |     |     |     |     |     | SF_adm>=12                     |
| Yes | No  | No  | No  | Yes | Yes | SF_exit<12 SF_adm<12           |
| No  | No  |     |     | No  | No  | SF_exit<12 SF_adm>=12          |
| Yes | Yes | No  | No  | Yes | Yes | SF_exit<12 SF_adm<12           |
| Yes | Yes |     |     | No  | No  | SF_exit<12 SF_adm>=12          |
|     |     |     |     |     |     | SF_adm>=12                     |
| Yes | Yes |     |     | No  | No  | SF_exit<12 SF_adm>=12          |
| No  | No  | No  | No  | No  | No  | SF_exit<12 SF_adm>=12          |
| Yes | No  |     |     | No  | No  | SF_exit<12 SF_adm<12           |
| No  | No  |     |     | No  | No  | SF_exit<12 SF_adm>=12          |
| Yes | Yes |     |     | Yes | Yes | SF_exit<12 SF_adm<12           |
| No  | No  | No  | No  | No  | No  | SF_exit<12 SF_adm>=12          |
| Yes | Yes |     |     | No  | No  | SF_exit<12 SF_adm>=12          |
| Yes | Yes | Yes | Yes | No  | No  | SF_exit<12 SF_adm<12           |
| Yes | Yes |     |     | No  | No  | SF_exit<12 SF_adm<12           |
| No  | No  | No  | No  | Yes | Yes | SF_exit<12 SF_adm>= moderate   |
| Yes | Yes |     |     | Yes | Yes | SF_exit<12 SF_adm<12           |
| No  | No  |     |     | No  | No  | SF_exit<12 SF_adm>=12          |
| Yes | Yes |     |     | Yes | Yes | SF_exit<12 SF_adm<12           |
|     |     |     |     |     |     | SF_adm>=12                     |
| No  | No  | No  | No  | No  | No  | SF_exit<12 SF_adm>= moderate   |
| No  | No  | No  | No  | Yes | Yes | SF_exit<12 SF_adm>= marked de  |
|     |     |     |     |     |     | SF_adm>=12                     |
| Yes | Yes | No  | No  | Yes | Yes | SF_exit<12 SF_adm<1'adequate   |
| Yes | No  | No  | Yes | Yes | Yes | SF_exit<12 SF_adm>= moderate   |
| No  | No  | No  | No  | No  | No  | SF_exit<12 SF_adm>=12          |
| No  | No  | No  | No  | No  | No  | SF_exit<12 SF_adm>= moderate   |
| No  | No  | No  | No  | No  | No  | SF_exit<12 SF_adm>= marked de  |
| No  | No  | No  | No  | Yes | Yes | SF_exit<12 SF_adm>=12          |
|     |     |     |     |     |     | SF_adm>=12                     |
| Yes | No  | No  | No  | No  | No  | SF_exit<12 SF_adm>= moderate   |
| No  | No  | No  | No  | No  | No  | SF_exit<12 SF_adm>= marked de  |
| Yes | Yes | Yes | Yes | Yes | Yes | SF_exit<12 SF_adm<1' marked de |
| Yes | Yes | No  | No  | No  | No  | SF_exit<12 SF_adm>= marked de  |
| Yes | Yes |     |     | Yes | Yes | SF_exit<12 SF_adm>= moderate   |
| No  | No  | No  | No  | No  | No  | SF_exit<12 SF_adm>= adequate   |
| No  | No  | No  | No  | No  | No  | SF_exit<12 SF_adm>= moderate   |
| No  | No  |     |     | No  | No  | SF_exit<12 SF_adm>= severe def |
| No  | No  | No  | No  | Yes | Yes | SF_exit<12 SF_adm>= marked de  |
| Yes | Yes | No  | No  | Yes | Yes | SF_exit<12 SF_adm<1' marked de |
| Yes | No  | No  | No  | No  | No  | SF_exit<12 SF_adm<1' moderate  |
| No  | No  | No  | No  | Yes | Yes | SF_exit<12 SF_adm>= moderate   |
| Yes | Yes | No  | No  | No  | Yes | SF_exit<12 SF_adm<1' marked de |
| No  | No  | No  | No  | Yes | Yes | SF_exit<12 SF_adm>= moderate   |
| No  | No  |     |     | No  | No  | SF_exit<12 SF_adm>=12          |
| Yes | Yes |     |     | Yes | Yes | SF_exit<12 SF_adm<12           |
| No  | No  |     |     | No  | No  | SF_exit<12 SF_adm>=12          |
| No  | No  | No  | No  | Yes | Yes | SF_exit<12 SF_adm>= adequate   |

|     |     |     |     |     |     |                                |
|-----|-----|-----|-----|-----|-----|--------------------------------|
| No  | No  | No  | No  | Yes | Yes | SF_exit<12 SF_adm>=12          |
| No  | No  |     |     | Yes | Yes | SF_exit<12 SF_adm>= severe def |
| Yes | Yes |     |     | Yes | Yes | SF_exit<12 SF_adm<12           |
| No  | No  | No  | No  | No  | No  | SF_exit<12 SF_adm>=12          |
| Yes | Yes |     |     | Yes | Yes | SF_exit<12 SF_adm<12           |
| No  | No  |     |     | Yes | Yes | SF_exit<12 SF_adm>=12          |
| No  | No  | No  | No  | No  | No  | SF_exit<12 SF_adm>=12          |
| No  | No  |     |     | No  | No  | SF_exit<12 SF_adm>=12          |
| No  | No  | No  | No  | Yes | No  | SF_exit<12 SF_adm>=12          |
| No  | No  |     |     | Yes | Yes | SF_exit<12 SF_adm>=12          |
| No  | No  | No  | No  | Yes | Yes | SF_exit<12 SF_adm>= adequate   |
| No  | No  | No  | No  | Yes | Yes | SF_exit<12 SF_adm>=12          |
|     |     |     |     |     |     | SF_adm>=12                     |
| No  | No  | No  | No  | Yes | Yes | SF_exit<12 SF_adm>=12          |
| Yes | Yes |     |     | Yes | Yes | SF_exit<12 SF_adm>=12          |
| Yes | Yes | No  | Yes | Yes | Yes | SF_exit<12 SF_adm>=12          |
| Yes | Yes |     |     | Yes | Yes | SF_exit<12 SF_adm<12           |
| No  | No  |     |     | No  | No  | SF_exit<12 SF_adm>=12          |
|     | Yes |     |     | Yes |     | SF_adm<12                      |
|     | No  |     |     | No  |     | SF_adm>=12                     |
| No  | No  |     |     | Yes | Yes | SF_exit<12 SF_adm>=12          |
| Yes | Yes | No  | No  | Yes | Yes | SF_exit<12 SF_adm>=12          |
| No  | No  | No  | No  | No  | No  | SF_exit<12 SF_adm>=12          |
| No  | No  | No  | No  | No  | No  | SF_exit<12 SF_adm>=12          |
| No  | No  |     |     | No  | No  | SF_exit<12 SF_adm>=12          |
| Yes | Yes | Yes | Yes | Yes | Yes | SF_exit<12 SF_adm<12           |
| No  | No  | No  | No  | Yes | Yes | SF_exit<12 SF_adm>= moderate   |
| No  | Yes | No  | No  | Yes | Yes | SF_exit<12 SF_adm<12           |
| No  | Yes | No  | No  | No  | No  | SF_exit<12 SF_adm>= moderate   |
| Yes | No  | Yes | Yes | Yes | Yes | SF_exit<12 SF_adm>= moderate   |
| Yes | Yes | Yes | Yes | Yes | Yes | SF_exit<12 SF_adm<12           |
| Yes | Yes | No  | No  | No  | No  | SF_exit<12 SF_adm>=12          |
| No  | No  |     |     | Yes | Yes | SF_exit<12 SF_adm>=12          |
| No  | No  | No  | No  | No  | No  | SF_exit<12 SF_adm>=12          |
| No  | No  | No  | No  | No  | No  | SF_exit<12 SF_adm>= marked de  |
| Yes | Yes | Yes | Yes | Yes | Yes | SF_exit<12 SF_adm<12           |
| Yes | Yes |     |     | Yes | Yes | SF_exit<12 SF_adm>=12          |
|     |     |     |     |     |     | SF_adm>=12                     |
| Yes | Yes |     |     | Yes | Yes | SF_exit<12 SF_adm<12           |
| Yes | Yes | No  | Yes | No  | No  | SF_exit<12 SF_adm>=12          |
| Yes | Yes | Yes | Yes | Yes | Yes | SF_exit<12 SF_adm<12           |
| Yes | Yes | Yes | Yes | Yes | Yes | SF_exit<12 SF_adm<12           |
| Yes | Yes | No  | No  | Yes | Yes | SF_exit<12 SF_adm<12           |
| No  | No  |     |     | Yes | Yes | SF_exit<12 SF_adm>=12          |
| No  | No  | No  | No  | No  | No  | SF_exit<12 SF_adm>= moderate   |
| No  | Yes | No  | No  | Yes | Yes | SF_exit<12 SF_adm>=12          |
| Yes | No  | No  | No  | Yes | Yes | SF_exit<12 SF_adm>= severe def |
|     |     |     |     |     |     | SF_adm>=12                     |
| Yes | Yes |     |     | Yes | Yes | SF_exit<12 SF_adm<12           |
| Yes | Yes |     |     | Yes | Yes | SF_exit<12 SF_adm<12           |
| Yes | Yes |     |     | Yes | Yes | SF_exit<12 SF_adm>=12          |

|     |     |     |     |     |     |                                 |
|-----|-----|-----|-----|-----|-----|---------------------------------|
|     |     |     |     |     |     | SF_adm>=12                      |
| No  | No  |     |     | No  | No  | SF_exit<12 SF_adm>=12           |
| Yes | No  |     |     | Yes | Yes | SF_exit<12 SF_adm>=12           |
| Yes | Yes | No  | No  | Yes | Yes | SF_exit<12 SF_adm>= moderate    |
| Yes | No  | No  | No  | Yes | Yes | SF_exit<12 SF_adm<1 marked de   |
| No  | No  | No  | No  | No  | No  | SF_exit<12 SF_adm>= moderate    |
| Yes | Yes |     |     | No  | No  | SF_exit<12 SF_adm>= adequate    |
| No  | No  | No  | No  | Yes | Yes | SF_exit<12 SF_adm>= adequate    |
| No  | No  | No  | No  | No  | No  | SF_exit<12 SF_adm>=12           |
| No  | No  |     |     | No  | No  | SF_exit<12 SF_adm>= marked de   |
| Yes | Yes | Yes | Yes | Yes | Yes | SF_exit<12 SF_adm<1 severe defi |
| No  | No  |     |     | No  | No  | SF_exit<12 SF_adm>=12           |
| No  | No  | No  | No  | Yes | Yes | SF_exit<12 SF_adm>=12           |
| Yes | No  | Yes | Yes | No  | No  | SF_exit<12 SF_adm<1 marked de   |
| Yes | Yes | Yes | Yes | Yes | Yes | SF_exit<12 SF_adm<12            |
| No  | No  | No  | No  | Yes | Yes | SF_exit<12 SF_adm>=12           |
| Yes | Yes |     |     | Yes | Yes | SF_exit<12 SF_adm<12            |
| Yes | Yes | Yes | Yes | Yes | Yes | SF_exit<12 SF_adm<1 severe def  |
| Yes | Yes |     |     | No  | No  | SF_exit<12 SF_adm<1 moderate    |
| Yes | Yes | No  | Yes | Yes | Yes | SF_exit<12 SF_adm>= adequate    |
| No  | No  | No  | No  | Yes | Yes | SF_exit<12 SF_adm>= marked de   |
| No  | No  | No  | No  | No  | No  | SF_exit<12 SF_adm>= severe def  |
| No  | No  | No  | No  | No  | No  | SF_exit<12 SF_adm>= severe def  |
| Yes | Yes | Yes | Yes | Yes | Yes | SF_exit<12 SF_adm<1 marked de   |
| No  | No  | No  | No  | Yes | Yes | SF_exit<12 SF_adm>=12           |
| Yes | Yes | No  | No  | No  | No  | SF_exit<12 SF_adm>=12           |
| Yes | Yes | No  | No  | No  | No  | SF_exit<12 SF_adm<1 severe def  |
| Yes | No  | Yes | Yes | Yes | Yes | SF_exit<12 SF_adm>= adequate    |
| No  | No  | No  | No  | No  | No  | SF_exit<12 SF_adm>= moderate    |
| Yes | No  | Yes | Yes | Yes | Yes | SF_exit<12 SF_adm>= severe def  |
| Yes | Yes | No  | No  | No  | No  | SF_exit<12 SF_adm<12            |
| No  | No  | No  | No  | No  | No  | SF_exit<12 SF_adm>=12           |
| No  | No  |     |     | Yes | Yes | SF_exit<12 SF_adm>=12           |
| No  | No  | No  | No  | No  | No  | SF_exit<12 SF_adm>= moderate    |
| No  | No  |     |     | No  | No  | SF_exit<12 SF_adm>= moderate    |
| No  | No  | No  | No  | No  | No  | SF_exit<12 SF_adm>= moderate    |
| Yes | Yes | Yes | Yes | No  | No  | SF_exit<12 SF_adm<1 adequate    |
| No  | No  | No  | No  | Yes | Yes | SF_exit<12 SF_adm>=12           |
| Yes | No  | No  | No  | Yes | Yes | SF_exit<12 SF_adm<1 moderate    |
| Yes | Yes | Yes | Yes | Yes | Yes | SF_exit<12 SF_adm<1 moderate    |
| Yes | Yes |     |     | No  | No  | SF_exit<12 SF_adm>= moderate    |
| No  | No  | No  | No  | No  | No  | SF_exit<12 SF_adm>= moderate    |
| Yes | Yes | No  | No  | Yes | Yes | SF_exit<12 SF_adm<1 moderate    |
| No  | No  | No  | No  | Yes | Yes | SF_exit<12 SF_adm>=12           |
| No  | No  | No  | No  | No  | No  | SF_exit<12 SF_adm>= marked de   |
| No  | No  | No  | No  | No  | No  | SF_exit<12 SF_adm>= moderate    |
| Yes | Yes | No  | No  | Yes | Yes | SF_exit<12 SF_adm<1 severe def  |
| No  | No  | No  | No  | No  | No  | SF_exit<12 SF_adm>= adequate    |
| No  | No  | No  | No  | No  | No  | SF_exit<12 SF_adm>=12           |
| Yes | Yes | No  | Yes | No  | No  | SF_exit<12 SF_adm<1 moderate    |
| No  | No  | No  | No  | No  | No  | SF_exit<12 SF_adm>= moderate    |

|     |     |     |     |     |     |                                 |
|-----|-----|-----|-----|-----|-----|---------------------------------|
| Yes | Yes |     |     | Yes | Yes | SF_exit<12 SF_adm<12            |
| No  | No  | No  | No  | Yes | Yes | SF_exit<12 SF_adm>= marked de   |
| No  | No  | No  | No  | No  | No  | SF_exit<12 SF_adm>= marked de   |
| Yes | Yes | No  | Yes | Yes | Yes | SF_exit<12 SF_adm>= marked de   |
| No  | No  | No  | No  | Yes | Yes | SF_exit<12 SF_adm>= adequate    |
| Yes | Yes | Yes | Yes | No  | Yes | SF_exit<12 SF_adm>= moderate    |
| Yes | Yes | No  | No  | Yes | Yes | SF_exit<12 SF_adm>= marked de   |
| Yes | No  | No  | Yes | No  | Yes | SF_exit<12 SF_adm>= moderate    |
| No  | No  | No  | No  | No  | No  | SF_exit<12 SF_adm>= moderate    |
| No  | No  | No  | No  | Yes | Yes | SF_exit<12 SF_adm>= severe def  |
| No  | No  | No  | No  | Yes | Yes | SF_exit<12 SF_adm>= marked de   |
| Yes | Yes | Yes | Yes | Yes | Yes | SF_exit<12 SF_adm<1 severe def  |
| No  | No  | No  | No  | Yes | Yes | SF_exit<12 SF_adm>= moderate    |
| Yes | Yes | Yes | Yes | Yes | Yes | SF_exit<12 SF_adm<1 adequate    |
| No  | No  | No  | No  | No  | No  | SF_exit<12 SF_adm>= moderate    |
| No  | No  |     |     | Yes | Yes | SF_exit<12 SF_adm>= moderate    |
| No  | Yes | No  | No  | Yes | Yes | SF_exit<12 SF_adm>= moderate    |
| No  | No  | No  | No  | No  | No  | SF_exit<12 SF_adm>= marked de   |
| No  | No  | No  | No  | No  | No  | SF_exit<12 SF_adm>= adequate    |
| Yes | Yes | No  | Yes | Yes | Yes | SF_exit<12 SF_adm>= moderate    |
| Yes | Yes | No  | No  | Yes | Yes | SF_exit<12 SF_adm<1 moderate    |
| Yes | Yes | No  | Yes | Yes | Yes | SF_exit<12 SF_adm>= marked de   |
| Yes | Yes |     |     | Yes | Yes | SF_exit<12 SF_adm<12            |
| No  | No  | No  | No  | No  | No  | SF_exit<12 SF_adm>= moderate    |
| No  | No  |     |     | No  | No  | SF_exit<12 SF_adm>=12           |
| Yes | Yes | No  | Yes | Yes | Yes | SF_exit<12 SF_adm>= moderate    |
| Yes | Yes |     |     | Yes | Yes | SF_exit<12 SF_adm<12            |
| Yes | Yes |     |     | Yes | Yes | SF_exit<12 SF_adm<12            |
| Yes | Yes | Yes | Yes | Yes | Yes | SF_exit<12 SF_adm<1 moderate    |
| Yes | Yes |     |     | Yes | Yes | SF_exit<12 SF_adm<12            |
| Yes | Yes |     |     | No  | No  | SF_exit<12 SF_adm<1 severe defi |
| No  | No  |     |     | No  | No  | SF_exit<12 SF_adm>= marked de   |
| Yes | Yes | No  | Yes | Yes | Yes | SF_exit<12 SF_adm>= moderate    |
| Yes | Yes | Yes | Yes | No  | No  | SF_exit<12 SF_adm<1 moderate    |
| Yes | Yes | Yes | Yes | Yes | Yes | SF_exit<12 SF_adm<12            |
| Yes | Yes | No  | No  | No  | No  | SF_exit<12 SF_adm<1 moderate    |
| Yes | Yes | Yes | Yes | Yes | Yes | SF_exit<12 SF_adm>= severe defi |
| Yes | Yes | Yes | Yes | Yes | Yes | SF_exit<12 SF_adm<1 moderate    |
| Yes | No  |     |     | No  | No  | SF_exit<12 SF_adm>=12           |
| Yes | No  | No  | No  | No  | No  | SF_exit<12 SF_adm<1 marked de   |
| Yes | Yes | Yes | Yes | Yes | Yes | SF_exit<12 SF_adm<1 moderate    |
| Yes | Yes |     |     | Yes | Yes | SF_exit<12 SF_adm<12            |
| Yes | Yes | No  | No  | Yes | Yes | SF_exit<12 SF_adm>= moderate    |
| Yes | Yes |     |     | Yes | Yes | SF_exit<12 SF_adm<12            |
| No  | No  | No  | No  | Yes | Yes | SF_exit<12 SF_adm>= moderate    |
| No  | No  | No  | No  | No  | No  | SF_exit<12 SF_adm>= severe def  |
| Yes | No  |     |     | Yes | Yes | SF_exit<12 SF_adm>= adequate    |
| Yes | Yes | No  | Yes | No  | No  | SF_exit<12 SF_adm>= severe def  |
| Yes | Yes |     |     | Yes | Yes | SF_exit<12 SF_adm<1 adequate    |
| Yes | No  |     |     | Yes | Yes | SF_exit<12 SF_adm>=12           |
| Yes | Yes | Yes | Yes | Yes | Yes | SF_exit<12 SF_adm<12            |

|     |     |     |     |     |     |                                |
|-----|-----|-----|-----|-----|-----|--------------------------------|
| Yes | Yes | Yes | Yes | Yes | Yes | SF_exit<12 SF_adm<1 marked de  |
| Yes | No  | No  | No  | No  | No  | SF_exit<12 SF_adm<12           |
| Yes | Yes |     |     | Yes | Yes | SF_exit<12 SF_adm>=12          |
|     | Yes |     |     | Yes |     | SF_adm>=12                     |
| Yes | Yes | Yes | Yes | Yes | Yes | SF_exit<12 SF_adm<12           |
|     | Yes |     |     | Yes |     | SF_adm<12                      |
| Yes | No  |     |     | No  | No  | SF_exit<12 SF_adm<12           |
|     |     |     |     |     |     | SF_adm>=12                     |
| No  | No  |     |     | Yes | Yes | SF_exit<12 SF_adm>=12          |
| Yes | No  |     |     | No  | No  | SF_exit<12 SF_adm>=12          |
| Yes | Yes |     |     | No  | No  | SF_exit<12 SF_adm>=12          |
| No  | No  | No  | No  | No  | No  | SF_exit<12 SF_adm>=12          |
| No  | No  | No  | No  | No  | No  | SF_exit<12 SF_adm>=12          |
| Yes | Yes | No  | No  | Yes | Yes | SF_exit<12 SF_adm<12           |
|     |     |     |     |     |     | SF_adm>=12                     |
| No  | No  | No  | No  | Yes | No  | SF_exit<12 SF_adm>= moderate   |
| Yes | Yes |     |     | No  | No  | SF_exit<12 SF_adm>=12          |
| Yes | Yes |     |     | No  | No  | SF_exit<12 SF_adm>=12          |
| Yes | No  |     |     | Yes | Yes | SF_exit<12 SF_adm<12           |
| No  | No  | No  | No  | No  | No  | SF_exit<12 SF_adm>= moderate   |
| Yes | Yes |     |     | Yes | Yes | SF_exit<12 SF_adm>=12          |
| No  | No  | No  | No  | Yes | Yes | SF_exit<12 SF_adm>= moderate   |
| No  | No  | No  | No  | Yes | Yes | SF_exit<12 SF_adm>=12          |
| No  | No  |     |     | No  | No  | SF_exit<12 SF_adm>=12          |
| Yes | Yes | Yes | Yes | Yes | Yes | SF_exit<12 SF_adm<1 marked de  |
| No  | No  | No  | No  | Yes | Yes | SF_exit<12 SF_adm>= adequate   |
| No  | No  | No  | No  | Yes | Yes | SF_exit<12 SF_adm>=12          |
| Yes | No  | No  | No  | No  | No  | SF_exit<12 SF_adm>=12          |
| No  | No  |     |     | Yes | Yes | SF_exit<12 SF_adm>=12          |
| No  | No  | No  | No  | No  | No  | SF_exit<12 SF_adm>= marked de  |
| Yes | Yes | Yes | Yes | No  | No  | SF_exit<12 SF_adm<1 adequate   |
| No  | No  | No  | No  | Yes | Yes | SF_exit<12 SF_adm>= moderate   |
| Yes | Yes | No  | Yes | Yes | Yes | SF_exit<12 SF_adm>= moderate   |
| No  | No  | No  | No  | Yes | Yes | SF_exit<12 SF_adm>=12          |
| No  | No  | No  | No  | No  | No  | SF_exit<12 SF_adm>= marked de  |
| Yes | No  | Yes | Yes | Yes | Yes | SF_exit<12 SF_adm<12           |
| No  | No  | No  | No  | Yes | Yes | SF_exit<12 SF_adm>= marked de  |
| No  | No  | No  | No  | No  | No  | SF_exit<12 SF_adm>= adequate   |
| Yes | Yes | No  | Yes | No  | No  | SF_exit<12 SF_adm>= severe def |
| No  | No  | No  | No  | No  | No  | SF_exit<12 SF_adm>=12          |
| No  | No  |     |     | Yes | Yes | SF_exit<12 SF_adm>= moderate   |
| No  | Yes | No  | No  | Yes | Yes | SF_exit<12 SF_adm>= adequate   |
| No  | No  |     |     | No  | No  | SF_exit<12 SF_adm>=12          |
| Yes | Yes | No  | No  | Yes | Yes | SF_exit<12 SF_adm>= marked de  |
| No  | No  | No  | No  | Yes | Yes | SF_exit<12 SF_adm>= adequate   |
|     | Yes |     |     | Yes |     | SF_adm<12                      |
| No  | No  | No  | No  | Yes | Yes | SF_exit<12 SF_adm>= adequate   |
| No  | No  | No  | No  | Yes | Yes | SF_exit<12 SF_adm>= adequate   |
| No  | No  |     |     | No  | No  | SF_exit<12 SF_adm>= moderate   |
| No  | No  | No  | No  | Yes | Yes | SF_exit<12 SF_adm>= adequate   |
| No  | No  | No  | No  | No  | No  | SF_exit<12 SF_adm>= marked de  |

|     |     |     |     |     |     |                                |
|-----|-----|-----|-----|-----|-----|--------------------------------|
|     |     |     |     |     |     | SF_adm>=12                     |
| No  | No  |     |     | No  | No  | SF_exit<12 SF_adm>= marked de  |
| No  | No  | No  | No  | No  | No  | SF_exit<12 SF_adm>=12          |
| No  | No  |     |     | No  | No  | SF_exit<12 SF_adm>=12          |
| No  | No  |     |     | Yes | Yes | SF_exit<12 SF_adm>=12          |
| Yes | Yes |     |     | Yes | Yes | SF_exit<12 SF_adm>=12          |
| Yes | Yes | Yes | Yes | Yes | Yes | SF_exit<12 SF_adm<12           |
| Yes | Yes |     |     | Yes | Yes | SF_exit<12 SF_adm<12           |
| Yes | Yes | Yes | Yes | Yes | Yes | SF_exit<12 SF_adm<1 marked de  |
| Yes | No  | No  | No  | No  | No  | SF_exit<12 SF_adm>= moderate   |
| No  | No  |     |     | Yes | Yes | SF_exit<12 SF_adm>=12          |
| Yes | Yes | Yes | Yes | No  | No  | SF_exit<12 SF_adm<12           |
| No  | No  | No  | No  | No  | No  | SF_exit<12 SF_adm>=12          |
| Yes | No  |     |     | Yes | Yes | SF_exit<12 SF_adm<1 adequate   |
| No  | No  |     |     | No  | No  | SF_exit<12 SF_adm>=12          |
| No  | No  |     |     | No  | No  | SF_exit<12 SF_adm>=12          |
| No  | No  | No  | No  | No  | No  | SF_exit<12 SF_adm>=12          |
| No  | No  | No  | No  | No  | No  | SF_exit<12 SF_adm>= moderate   |
| No  | No  | No  | No  | No  | No  | SF_exit<12 SF_adm>= moderate   |
| No  | No  | No  | No  | No  | No  | SF_exit<12 SF_adm>= moderate   |
| No  | No  | No  | No  | No  | No  | SF_exit<12 SF_adm>= marked de  |
| No  | No  |     |     | Yes | Yes | SF_exit<12 SF_adm>=12          |
| No  | No  | No  | No  | No  | No  | SF_exit<12 SF_adm>= marked de  |
| No  | No  | No  | No  | Yes | Yes | SF_exit<12 SF_adm>= adequate   |
| Yes | No  | No  | No  | No  | No  | SF_exit<12 SF_adm>= severe def |
| Yes | No  | No  | No  | No  | No  | SF_exit<12 SF_adm<1 moderate   |
| No  | No  | No  | No  | No  | No  | SF_exit<12 SF_adm>= moderate   |
| No  | No  | No  | No  | No  | No  | SF_exit<12 SF_adm>= moderate   |
| Yes | Yes | No  | No  | Yes | Yes | SF_exit<12 SF_adm<12           |
| Yes | Yes | Yes | Yes | Yes | Yes | SF_exit<12 SF_adm<1 moderate   |
| Yes | Yes | No  | No  | No  | No  | SF_exit<12 SF_adm<1 adequate   |
| No  | No  |     |     | No  | No  | SF_exit<12 SF_adm>=12          |
| No  | No  | No  | No  | No  | No  | SF_exit<12 SF_adm>= adequate   |
| No  | No  | No  | No  | No  | No  | SF_exit<12 SF_adm>= adequate   |
| No  | No  |     |     | Yes | Yes | SF_exit<12 SF_adm>= moderate   |
| Yes | Yes |     |     | No  | No  | SF_exit<12 SF_adm>=12          |
| No  | No  | No  | No  | No  | No  | SF_exit<12 SF_adm>= moderate   |
| No  | Yes | No  | No  | Yes | No  | SF_exit<12 SF_adm<1 adequate   |



| B12_statu | B12_cat_a           | B12_cat_e | malaria_ac | ari_adm | diar_adm | fever_adm | malaria_ex | ari_exit |
|-----------|---------------------|-----------|------------|---------|----------|-----------|------------|----------|
|           |                     |           | Yes        | No      | No       | No        | No         | No       |
|           |                     |           | Yes        | No      | No       | No        | No         | No       |
|           |                     |           | Yes        | No      | No       | No        | No         | No       |
| adequate  | adequate            | adequate  | No         | No      | No       | No        | No         | No       |
|           |                     |           | No         | Yes     | No       | No        | No         | No       |
|           |                     |           | No         | Yes     | No       | No        | No         | No       |
|           |                     |           | No         | No      | No       | Yes       | No         | No       |
|           |                     |           | No         | No      | Yes      | Yes       | No         | No       |
|           |                     |           | No         | No      | Yes      | No        | No         | No       |
|           |                     |           | No         | Yes     | Yes      | Yes       | No         | Yes      |
|           |                     |           | No         | No      | No       | No        | No         | No       |
|           |                     |           | No         | No      | Yes      | No        | No         | Yes      |
| adequate  | adequate            | adequate  | No         | No      | No       | Yes       | No         | No       |
|           |                     |           | No         | No      | No       | No        | No         | No       |
|           |                     |           | Yes        | No      | No       | Yes       | No         | No       |
|           |                     |           | Yes        | Yes     | No       | Yes       | No         | No       |
|           |                     |           | No         | No      | No       | No        | No         | No       |
|           |                     |           | No         | No      | No       | No        | No         | No       |
|           |                     |           | No         | Yes     | No       | No        | No         | No       |
|           |                     |           | No         | No      | No       | No        | No         | No       |
|           |                     |           | No         | Yes     | No       | Yes       | No         | No       |
| moderate  | Marked or adequate  | Yes       | Yes        | No      | No       | No        | No         | No       |
| moderate  | adequate            | adequate  | No         | No      | Yes      | No        | No         | No       |
|           |                     |           | No         | No      | No       | No        | No         | No       |
|           |                     |           | No         | Yes     | No       | Yes       | No         | No       |
| moderate  | Marked or adequate  | No        | No         | No      | No       | Yes       | No         | No       |
| moderate  | adequate            | adequate  | No         | Yes     | No       | No        | No         | No       |
| moderate  | adequate            | adequate  | Yes        | No      | Yes      | Yes       | No         | No       |
| adequate  | adequate            | adequate  | No         | No      | Yes      | No        | No         | No       |
| marked de | Marked or Marked or | No        | No         | No      | No       | No        | Yes        | Yes      |
| moderate  | Marked or adequate  | No        | No         | No      | Yes      | No        | No         | No       |
|           |                     |           | No         | No      | Yes      | No        | No         | No       |
| adequate  | adequate            | adequate  | No         | Yes     | Yes      | No        | No         | No       |
| adequate  | adequate            | adequate  | No         | No      | Yes      | No        | No         | No       |
| moderate  | Marked or adequate  | No        | No         | No      | No       | No        | No         | No       |
| adequate  | adequate            | adequate  | No         | No      | No       | No        | No         | No       |
| moderate  | adequate            | adequate  | No         | No      | No       | No        | No         | No       |
| moderate  | Marked or adequate  | No        | No         | No      | No       | No        | No         | No       |
| moderate  | adequate            | adequate  | Yes        | No      | No       | No        | Yes        | No       |
| adequate  | Marked or adequate  | No        | No         | No      | No       | No        | No         | No       |
| adequate  | adequate            | adequate  | No         | No      | No       | Yes       | No         | No       |
| moderate  | adequate            | adequate  | No         | No      | Yes      | Yes       | No         | No       |
|           |                     |           | No         | Yes     | Yes      | No        | No         | No       |
|           |                     |           | No         | No      | No       | No        | No         | No       |
|           |                     |           | No         | No      | Yes      | Yes       | No         | No       |
| adequate  | adequate            | adequate  | Yes        | No      | No       | No        | No         | No       |
| moderate  | adequate            | adequate  | Yes        | No      | No       | Yes       | No         | No       |
| marked de | adequate            | Marked or | Yes        | No      | No       | No        | No         | No       |
| adequate  | adequate            | adequate  | Yes        | No      | No       | No        | No         | No       |
| moderate  | adequate            | adequate  | Yes        | Yes     | Yes      | No        | No         | No       |

|                    |                    |          |     |     |     |     |
|--------------------|--------------------|----------|-----|-----|-----|-----|
| moderate           | Marked or adequate | No       | No  | No  | No  | No  |
| moderate           | Marked or adequate | Yes      | No  | No  | No  | No  |
| moderate           | adequate           | adequate | Yes | No  | No  | No  |
|                    |                    | Yes      | Yes | No  | Yes | No  |
| moderate           | Marked or adequate | No       | No  | No  | No  | No  |
| moderate           | adequate           | adequate | No  | No  | Yes | No  |
|                    |                    | No       | No  | No  | No  | No  |
| adequate           | adequate           | adequate | No  | No  | No  | No  |
|                    |                    | No       | No  | Yes | No  | No  |
|                    |                    | No       | No  | No  | No  | No  |
| moderate           | Marked or adequate | No       | No  | No  | No  | No  |
| moderate           | adequate           | adequate | No  | No  | No  | No  |
|                    |                    | No       | Yes | No  | No  | No  |
| adequate           | adequate           | adequate | Yes | No  | Yes | No  |
|                    |                    | No       | Yes | Yes | Yes | No  |
|                    |                    | No       | Yes | No  | No  | No  |
| adequate           | adequate           | adequate | No  | No  | Yes | No  |
|                    |                    | No       | No  | No  | No  | No  |
| moderate           | adequate           | adequate | No  | No  | No  | No  |
| moderate           | adequate           | adequate | No  | Yes | Yes | No  |
| adequate           | adequate           | adequate | No  | Yes | No  | No  |
| moderate           | Marked or adequate | No       | No  | No  | No  | No  |
| adequate           | adequate           | adequate | No  | Yes | No  | No  |
| moderate           | adequate           | adequate | No  | No  | No  | No  |
| moderate           | adequate           | adequate | No  | No  | No  | No  |
|                    |                    | Yes      | No  | No  | No  | Yes |
| moderate           | adequate           | adequate | No  | No  | Yes | No  |
|                    |                    | No       | No  | No  | No  | No  |
| moderate           | adequate           | adequate | No  | Yes | No  | No  |
| adequate           | adequate           | adequate | No  | No  | No  | No  |
|                    |                    | No       | No  | No  | No  | No  |
|                    |                    | No       | No  | No  | No  | No  |
|                    |                    | No       | No  | Yes | No  | No  |
|                    |                    | No       | No  | No  | Yes | No  |
|                    |                    | No       | Yes | No  | No  | No  |
|                    |                    | No       | Yes | No  | No  | No  |
|                    |                    | No       | No  | No  | No  | Yes |
|                    |                    | No       | No  | No  | Yes | No  |
|                    |                    | No       | No  | Yes | No  | No  |
|                    |                    | No       | Yes | No  | No  | No  |
|                    |                    | No       | Yes | Yes | No  | No  |
| moderate           | Marked or adequate | No       | No  | Yes | No  | No  |
| adequate           | Marked or adequate | No       | Yes | No  | No  | No  |
|                    |                    | Yes      | No  | Yes | No  | Yes |
| marked de adequate | Marked or          | Yes      | Yes | No  | No  | No  |
|                    |                    | No       | No  | Yes | No  | No  |
|                    |                    | Yes      | No  | No  | No  | No  |
| adequate           | Marked or adequate | No       | No  | Yes | No  | No  |
|                    |                    | No       | Yes | Yes | No  | No  |
|                    |                    | No       | No  | Yes | No  | No  |
| adequate           | adequate           | adequate | No  | Yes | No  | No  |

|            |                     |           |     |     |     |     |
|------------|---------------------|-----------|-----|-----|-----|-----|
|            | No                  | No        | Yes | No  | No  | No  |
| moderate   | adequate            | adequate  | Yes | Yes | No  | No  |
| moderate   | adequate            | adequate  | No  | No  | No  | No  |
|            | Yes                 | No        | No  | No  | No  | No  |
| moderate   | Marked or           | adequate  | No  | No  | No  | No  |
|            | No                  | No        | No  | No  | No  | No  |
| moderate   | adequate            | adequate  | No  | No  | Yes | No  |
| adequate   | adequate            | adequate  | No  | Yes | No  | No  |
| adequate   | adequate            | adequate  | No  | Yes | No  | No  |
| moderate   | adequate            | adequate  | Yes | No  | Yes | No  |
|            | No                  | No        | No  | No  | No  | No  |
| adequate   | adequate            | adequate  | No  | Yes | No  | No  |
|            | No                  | No        | Yes | No  | No  | No  |
| moderate   | adequate            | adequate  | No  | Yes | Yes | No  |
| adequate   | adequate            | adequate  | No  | Yes | Yes | No  |
|            | No                  | No        | Yes | No  | No  | No  |
|            | No                  | No        | No  | No  | No  | No  |
| moderate   | adequate            | adequate  | No  | Yes | No  | No  |
| moderate   | adequate            | adequate  | No  | No  | No  | No  |
|            | No                  | Yes       | No  | No  | No  | No  |
| moderate   | Marked or           | adequate  | No  | No  | Yes | No  |
| deficiency | adequate or moderat | Yes       | No  | No  | No  | No  |
| moderate   | adequate            | adequate  | No  | No  | No  | Yes |
|            | No                  | No        | No  | No  | Yes | No  |
|            | Yes                 | No        | No  | No  | Yes | No  |
|            | No                  | Yes       | No  | No  | Yes | No  |
| adequate   | adequate            | adequate  | No  | No  | No  | No  |
|            | No                  | No        | No  | No  | No  | No  |
| moderate   | Marked or           | adequate  | No  | No  | No  | No  |
| moderate   | adequate            | adequate  | No  | No  | Yes | Yes |
|            | No                  | No        | No  | No  | Yes | No  |
|            | No                  | No        | No  | No  | No  | No  |
| adequate   | adequate            | adequate  | No  | Yes | No  | Yes |
|            | No                  | No        | No  | No  | Yes | No  |
| marked de  | Marked or           | Marked or | No  | No  | No  | Yes |
| moderate   | adequate            | adequate  | Yes | No  | No  | Yes |
| adequate   | adequate            | adequate  | Yes | No  | Yes | No  |
|            | No                  | No        | No  | No  | No  | No  |
|            | No                  | No        | No  | No  | Yes | No  |
|            | No                  | No        | No  | No  | No  | No  |
| marked de  | Marked or           | Marked or | No  | No  | No  | No  |
| moderate   | Marked or           | adequate  | Yes | No  | No  | No  |
| adequate   | adequate            | adequate  | Yes | Yes | No  | Yes |
|            | Yes                 | Yes       | Yes | Yes | No  | No  |
|            | Yes                 | No        | No  | Yes | No  | No  |
| moderate   | Marked or           | adequate  | No  | No  | Yes | No  |
| adequate   | adequate            | adequate  | Yes | No  | Yes | No  |
|            | Yes                 | No        | Yes | Yes | No  | No  |
|            | Yes                 | Yes       | Yes | No  | No  | No  |
|            | Yes                 | Yes       | No  | No  | No  | No  |
|            | No                  | Yes       | No  | No  | No  | No  |

|          |                    |          |     |     |     |     |
|----------|--------------------|----------|-----|-----|-----|-----|
|          | Yes                | Yes      | No  | No  | No  | No  |
|          | No                 | No       | No  | No  | No  | No  |
|          | No                 | No       | No  | No  | No  | No  |
|          | No                 | Yes      | Yes | No  | No  | Yes |
|          | No                 | Yes      | Yes | No  | No  | No  |
|          | No                 | Yes      | No  | No  | No  | No  |
|          | Yes                | Yes      | No  | No  | No  | No  |
|          | No                 | No       | No  | No  | No  | No  |
|          | No                 | No       | No  | Yes | No  | No  |
|          | No                 | No       | No  | No  | No  | Yes |
|          | No                 | No       | No  | No  | No  | No  |
|          | Yes                | No       | No  | No  | No  | No  |
|          | No                 | Yes      | No  | No  | No  | No  |
|          | No                 | Yes      | No  | No  | No  | No  |
|          | Yes                | Yes      | No  | Yes | No  | No  |
|          | No                 | No       | Yes | Yes | No  | No  |
|          | No                 | Yes      | No  | No  | No  | No  |
|          | No                 | No       | No  | No  | No  | No  |
|          | No                 | Yes      | No  | No  | No  | No  |
|          | No                 | Yes      | No  | No  | No  | No  |
|          | No                 | Yes      | No  | No  | No  | No  |
|          | No                 | Yes      | No  | Yes | No  | No  |
|          | No                 | No       | No  | Yes | No  | No  |
|          | No                 | No       | Yes | No  | No  | No  |
|          | No                 | Yes      | No  | No  | No  | No  |
| moderate | Marked or adequate | No       | Yes | No  | Yes | No  |
|          | No                 | No       | No  | Yes | No  | No  |
|          | No                 | No       | No  | No  | No  | No  |
|          | No                 | Yes      | No  | No  | No  | No  |
|          | No                 | Yes      | Yes | No  | Yes | Yes |
|          | No                 | No       | No  | No  | No  | No  |
|          | Yes                | No       | Yes | No  | No  | No  |
| moderate | Marked or adequate | No       | No  | No  | No  | No  |
|          | No                 | No       | No  | No  | No  | No  |
|          | No                 | No       | No  | No  | No  | No  |
| moderate | Marked or adequate | Yes      | Yes | No  | Yes | No  |
|          | Yes                | No       | No  | No  | No  | No  |
|          | Yes                | No       | No  | No  | No  | No  |
| moderate | adequate           | adequate | Yes | Yes | No  | No  |
| moderate | adequate           | adequate | No  | Yes | No  | No  |
|          | No                 | Yes      | No  | No  | No  | No  |
| moderate | Marked or adequate | Yes      | No  | No  | No  | No  |
| moderate | Marked or adequate | Yes      | No  | No  | No  | No  |
|          | Yes                | No       | No  | No  | No  | No  |
| moderate | adequate           | adequate | No  | Yes | No  | No  |
|          | Yes                | Yes      | No  | No  | No  | No  |
| moderate | adequate           | adequate | Yes | No  | No  | No  |
|          | Yes                | Yes      | No  | No  | No  | No  |
|          | No                 | Yes      | No  | No  | No  | No  |
| moderate | adequate           | adequate | Yes | Yes | No  | Yes |
|          | No                 | No       | No  | Yes | No  | No  |

|           |           |           |     |     |     |     |     |     |
|-----------|-----------|-----------|-----|-----|-----|-----|-----|-----|
| adequate  | adequate  | adequate  | No  | No  | Yes | No  | No  | No  |
| adequate  | adequate  | adequate  | Yes | Yes | Yes | Yes | No  | No  |
|           |           | No        | Yes | No  | No  | No  | No  | No  |
| moderate  | adequate  | adequate  | Yes | Yes | Yes | No  | No  | No  |
| marked de | Marked or | Marked or | No  | Yes | Yes | No  | No  | No  |
| moderate  | adequate  | adequate  | Yes | No  | No  | Yes | No  | No  |
| moderate  | Marked or | adequate  | No  | No  | Yes | No  | No  | No  |
|           |           | Yes       | No  | No  | No  | No  | No  | No  |
|           |           | No        | Yes | No  | No  | No  | Yes | No  |
| adequate  | adequate  | adequate  | No  | Yes | No  | No  | Yes | No  |
|           |           | Yes       | Yes | Yes | No  | No  | No  | Yes |
|           |           | Yes       | Yes | No  | No  | Yes | No  | No  |
|           |           | Yes       | No  | No  | No  | Yes | No  | No  |
|           |           | Yes       | No  | Yes | Yes | Yes | Yes | Yes |
|           |           | Yes       | Yes | No  | No  | No  | No  | No  |
|           |           | Yes       | Yes | Yes | No  | No  | No  | No  |
| moderate  | adequate  | adequate  | No  | No  | Yes | Yes | No  | No  |
|           |           | No        | No  | No  | No  | Yes | No  | No  |
|           |           | Yes       | No  | No  | No  | No  | No  | No  |
|           |           | Yes       | Yes | Yes | Yes | Yes | No  | No  |
|           |           | No        | Yes | Yes | Yes | No  | No  | No  |
|           |           | No        | No  | No  | No  | No  | No  | No  |
|           |           | No        | Yes | Yes | No  | No  | No  | No  |
|           |           | Yes       | Yes | No  | No  | No  | No  | No  |
|           |           | No        | Yes | No  | No  | No  | No  | No  |
|           |           | Yes       | Yes | No  | No  | Yes | No  | Yes |
|           |           | No        | Yes | Yes | Yes | Yes | No  | No  |
|           |           | No        | Yes | No  | No  | No  | No  | No  |
|           |           | No        | Yes | Yes | Yes | Yes | No  | No  |
|           |           | No        | Yes | No  | No  | No  | No  | No  |
|           |           | No        | Yes | Yes | No  | No  | No  | Yes |
|           |           | No        | Yes | No  | No  | Yes | No  | No  |
|           |           | No        | No  | No  | No  | Yes | No  | No  |
|           |           | No        | Yes | No  | No  | No  | No  | No  |
|           |           | No        | Yes | No  | No  | Yes | No  | No  |
|           |           | Yes       | No  | No  | No  | No  | No  | Yes |
|           |           | No        | Yes | No  | No  | No  | No  | No  |
|           |           | No        | Yes | Yes | No  | No  | No  | No  |
|           |           | No        | Yes | Yes | Yes | No  | No  | No  |
|           |           | No        | Yes | Yes | Yes | No  | No  | No  |
|           |           | No        | No  | No  | No  | Yes | No  | No  |
|           |           | No        | Yes | No  | No  | No  | No  | No  |
| adequate  | adequate  | adequate  | No  | Yes | No  | No  | No  | No  |
|           |           | No        | Yes | No  | No  | Yes | No  | No  |
| marked de | Marked or | Marked or | No  | Yes | No  | No  | No  | No  |
|           |           | No        | Yes | No  | No  | Yes | No  | No  |
|           |           | No        | Yes | No  | No  | Yes | No  | No  |

|            |                     |           |     |     |     |     |
|------------|---------------------|-----------|-----|-----|-----|-----|
|            | No                  | Yes       | Yes | No  | No  | Yes |
| moderate   | adequate            | adequate  | No  | No  | No  | No  |
|            | No                  | Yes       | No  | No  | No  | No  |
| moderate   | Marked or           | adequate  | No  | No  | No  | No  |
|            | No                  | Yes       | No  | Yes | No  | No  |
|            | No                  | Yes       | No  | No  | No  | No  |
|            | No                  | No        | No  | No  | No  | Yes |
| moderate   | adequate            | adequate  | Yes | No  | No  | No  |
| adequate   | adequate            | adequate  | No  | No  | No  | No  |
|            | Yes                 | No        | No  | No  | No  | No  |
| adequate   | Marked or           | adequate  | No  | No  | No  | No  |
| adequate   | adequate            | adequate  | No  | Yes | No  | No  |
| marked de  | Marked or           | Marked or | No  | No  | No  | No  |
| moderate   | adequate            | adequate  | Yes | Yes | No  | No  |
| adequate   | adequate            | adequate  | Yes | No  | No  | No  |
|            | No                  | No        | No  | No  | No  | No  |
| moderate   | Marked or           | adequate  | No  | No  | No  | No  |
| adequate   | adequate            | adequate  | No  | Yes | No  | Yes |
| moderate   | adequate            | adequate  | No  | No  | No  | No  |
| marked de  | adequate            | Marked or | Yes | No  | No  | No  |
| moderate   | adequate            | adequate  | No  | No  | No  | No  |
|            | No                  | Yes       | No  | Yes | No  | No  |
| moderate   | adequate            | adequate  | No  | No  | No  | No  |
| marked de  | Marked or           | Marked or | Yes | No  | No  | No  |
| adequate   | adequate            | adequate  | No  | Yes | No  | No  |
| moderate   | adequate            | adequate  | Yes | No  | No  | No  |
| moderate   | Marked or           | adequate  | Yes | No  | No  | No  |
|            | Yes                 | No        | No  | Yes | No  | No  |
|            | Yes                 | No        | No  | No  | No  | No  |
| adequate   | adequate            | adequate  | Yes | No  | No  | No  |
| moderate   | adequate            | adequate  | No  | No  | No  | No  |
| moderate   | Marked or           | adequate  | Yes | No  | No  | No  |
| moderate   | Marked or           | adequate  | Yes | Yes | No  | No  |
| moderate   | adequate            | adequate  | Yes | No  | No  | No  |
| adequate   | adequate            | adequate  | No  | No  | No  | No  |
| moderate   | Marked or           | adequate  | Yes | Yes | No  | Yes |
| moderate   | adequate            | adequate  | Yes | No  | Yes | No  |
| moderate   | adequate            | adequate  | Yes | No  | Yes | No  |
|            | Yes                 | No        | Yes | Yes | No  | No  |
| adequate   | adequate            | adequate  | Yes | No  | No  | No  |
| adequate   | adequate            | adequate  | Yes | No  | No  | No  |
| adequate   | adequate            | adequate  | No  | Yes | No  | No  |
| adequate   | adequate            | adequate  | Yes | No  | No  | No  |
|            | Yes                 | No        | No  | No  | No  | No  |
| moderate   | Marked or           | adequate  | Yes | Yes | No  | No  |
| moderate   | adequate            | adequate  | Yes | No  | Yes | No  |
| moderate   | adequate            | adequate  | No  | No  | No  | No  |
| adequate   | adequate            | adequate  | No  | Yes | No  | No  |
|            | No                  | Yes       | No  | No  | Yes | No  |
| deficiency | adequate or moderat | Yes       | Yes | No  | No  | No  |
| moderate   | adequate            | adequate  | No  | Yes | No  | No  |

|            |                      |           |     |     |     |     |    |
|------------|----------------------|-----------|-----|-----|-----|-----|----|
| adequate   | Marked or adequate   | No        | Yes | No  | No  | No  | No |
|            |                      | No        | Yes | No  | No  | No  | No |
|            |                      | No        | No  | No  | No  | No  | No |
| deficiency | adequate or moderate | Yes       | No  | No  | Yes | No  | No |
| moderate   | Marked or adequate   | No        | No  | No  | No  | No  | No |
|            |                      | Yes       | No  | Yes | No  | No  | No |
| moderate   | Marked or adequate   | Yes       | No  | No  | No  | No  | No |
| adequate   | adequate             | adequate  | No  | No  | Yes | No  | No |
| marked de  | Marked or            | Marked or | Yes | No  | Yes | No  | No |
| moderate   | adequate             | adequate  | Yes | No  | Yes | No  | No |
| moderate   | adequate             | adequate  | Yes | No  | Yes | No  | No |
| adequate   | adequate             | adequate  | No  | Yes | No  | No  | No |
| moderate   | adequate             | adequate  | No  | No  | No  | No  | No |
| adequate   | adequate             | adequate  | No  | No  | Yes | No  | No |
| adequate   | adequate             | adequate  | Yes | No  | Yes | No  | No |
| moderate   | Marked or adequate   | No        | No  | No  | No  | No  | No |
|            |                      | No        | No  | Yes | No  | No  | No |
|            |                      | Yes       | No  | No  | No  | No  | No |
| severe def | Marked or            | Marked or | No  | No  | No  | No  | No |
|            |                      | No        | No  | No  | Yes | No  | No |
|            |                      | Yes       | No  | No  | Yes | No  | No |
| adequate   | adequate             | adequate  | No  | No  | No  | No  | No |
| moderate   | adequate             | adequate  | No  | Yes | No  | No  | No |
|            |                      | Yes       | No  | No  | No  | Yes | No |
| moderate   | adequate             | adequate  | No  | No  | No  | No  | No |
| ficiency   | Marked or severe     | No        | No  | No  | No  | No  | No |
|            |                      | Yes       | Yes | No  | Yes | No  | No |
|            |                      | Yes       | Yes | Yes | Yes | No  | No |
|            |                      | No        | Yes | No  | No  | No  | No |
|            |                      | No        | No  | No  | No  | No  | No |
|            |                      | Yes       | Yes | No  | No  | No  | No |
|            |                      | No        | Yes | No  | No  | No  | No |
|            |                      | No        | Yes | No  | No  | No  | No |
|            |                      | Yes       | Yes | No  | No  | No  | No |
|            |                      | Yes       | Yes | No  | No  | No  | No |
|            |                      | No        | Yes | Yes | No  | No  | No |
|            |                      | No        | Yes | No  | No  | No  | No |
|            |                      | No        | Yes | Yes | Yes | Yes | No |
| moderate   | Marked or adequate   | No        | Yes | No  | No  | No  | No |
| adequate   | adequate             | adequate  | No  | No  | No  | No  | No |
|            |                      | No        | No  | No  | No  | No  | No |
| marked de  | Marked or            | Marked or | Yes | No  | No  | No  | No |
|            |                      | Yes       | No  | Yes | No  | No  | No |
| adequate   | adequate             | adequate  | Yes | No  | Yes | No  | No |
|            |                      | Yes       | Yes | No  | No  | No  | No |
| moderate   | Marked or adequate   | No        | Yes | No  | No  | No  | No |
| moderate   | adequate             | adequate  | Yes | No  | No  | No  | No |
| adequate   | adequate             | adequate  | No  | Yes | No  | No  | No |

|           |           |           |     |     |     |     |     |
|-----------|-----------|-----------|-----|-----|-----|-----|-----|
|           |           | Yes       | Yes | No  | No  | No  | No  |
| moderate  | adequate  | adequate  | Yes | No  | No  | Yes | No  |
|           |           | Yes       | Yes | No  | No  | No  | No  |
| adequate  | adequate  | adequate  | Yes | Yes | No  | No  | No  |
|           |           | Yes       | No  | No  | No  | No  | No  |
| moderate  | adequate  | adequate  | Yes | Yes | No  | Yes | No  |
|           |           | No        | Yes | No  | No  | No  | No  |
|           |           | No        | Yes | No  | No  | No  | No  |
| marked de | Marked or | Marked or | No  | No  | No  | No  | No  |
| moderate  | Marked or | adequate  | No  | Yes | No  | No  | No  |
| adequate  | adequate  | adequate  | No  | Yes | No  | No  | No  |
| moderate  | adequate  | adequate  | No  | No  | Yes | No  | No  |
| ficiency  | Marked or | severate  | No  | Yes | No  | No  | No  |
| moderate  | Marked or | adequate  | No  | No  | No  | No  | No  |
| moderate  | adequate  | adequate  | Yes | No  | No  | Yes | No  |
|           |           | Yes       | Yes | No  | No  | No  | No  |
|           |           | Yes       | No  | No  | Yes | No  | No  |
| adequate  | adequate  | adequate  | No  | No  | No  | No  | No  |
| moderate  | adequate  | adequate  | Yes | No  | Yes | No  | No  |
| adequate  | adequate  | adequate  | Yes | No  | No  | Yes | No  |
|           |           | No        | No  | No  | No  | No  | No  |
|           |           | No        | No  | No  | No  | No  | No  |
|           |           | No        | No  | No  | No  | No  | No  |
|           |           | No        | No  | No  | No  | No  | No  |
|           |           | No        | No  | Yes | No  | No  | No  |
| moderate  | adequate  | adequate  | Yes | No  | No  | No  | No  |
| marked de | Marked or | Marked or | Yes | No  | Yes | Yes | No  |
|           |           | Yes       | No  | No  | No  | No  | No  |
| marked de | adequate  | Marked or | No  | No  | No  | No  | Yes |
|           |           | No        | No  | No  | No  | No  | No  |
| adequate  | adequate  | adequate  | Yes | Yes | No  | No  | No  |
| moderate  | Marked or | adequate  | Yes | No  | No  | No  | No  |
|           |           | No        | Yes | No  | Yes | No  | No  |
|           |           | Yes       | No  | No  | Yes | No  | No  |
|           |           | Yes       | No  | Yes | Yes | No  | No  |
|           |           | Yes       | Yes | No  | No  | No  | No  |
|           |           | No        | Yes | No  | No  | No  | No  |
|           |           | No        | No  | Yes | No  | No  | No  |
|           |           | Yes       | Yes | No  | Yes | No  | No  |
|           |           | No        | No  | No  | No  | No  | No  |
|           |           | Yes       | Yes | Yes | Yes | No  | No  |
|           |           | No        | Yes | No  | No  | No  | No  |
|           |           | No        | Yes | No  | No  | No  | No  |
|           |           | Yes       | Yes | No  | No  | No  | No  |
|           |           | No        | Yes | Yes | No  | No  | No  |
|           |           | Yes       | Yes | Yes | Yes | No  | No  |
|           |           | No        | Yes | No  | No  | No  | No  |
|           |           | No        | No  | No  | No  | No  | No  |
| moderate  | adequate  | adequate  | No  | No  | No  | No  | No  |
|           |           | No        | No  | No  | No  | No  | No  |
|           |           | No        | No  | No  | No  | No  | No  |



|            |                     |           |     |     |     |     |
|------------|---------------------|-----------|-----|-----|-----|-----|
|            | No                  | No        | No  | No  | No  | No  |
| moderate   | adequate            | adequate  | No  | Yes | No  | No  |
| marked de  | adequate            | Marked or | Yes | Yes | No  | No  |
| deficiency | adequate or moderat | No        | No  | No  | Yes | No  |
|            | Yes                 | No        | Yes | Yes | No  | No  |
|            | No                  | No        | Yes | No  | No  | No  |
|            | No                  | Yes       | No  | No  | Yes | Yes |
|            | No                  | No        | No  | No  | No  | No  |
| moderate   | Marked or           | adequate  | Yes | No  | No  | No  |
| moderate   | Marked or           | adequate  | No  | No  | Yes | No  |
| moderate   | adequate            | adequate  | No  | Yes | Yes | No  |
| moderate   | adequate            | adequate  | No  | No  | No  | No  |
| moderate   | Marked or           | adequate  | Yes | No  | No  | No  |
|            | Yes                 | Yes       | No  | No  | No  | No  |
| moderate   | adequate            | adequate  | No  | Yes | No  | No  |
| moderate   | adequate            | adequate  | No  | Yes | No  | No  |
| adequate   | adequate            | adequate  | Yes | No  | No  | No  |
|            | Yes                 | No        | No  | No  | No  | No  |
|            | adequate or moderat | No        | No  | No  | No  | No  |
|            | Yes                 | No        | No  | Yes | No  | No  |
| adequate   | adequate            | adequate  | No  | No  | No  | No  |
| marked de  | Marked or           | Marked or | No  | No  | No  | No  |
| moderate   | Marked or           | adequate  | No  | No  | No  | No  |
| moderate   | adequate            | adequate  | Yes | Yes | No  | No  |
| moderate   | adequate            | adequate  | Yes | No  | Yes | No  |
|            | No                  | No        | No  | No  | No  | No  |
| adequate   | adequate            | adequate  | No  | No  | No  | No  |
|            | No                  | No        | No  | No  | No  | No  |
|            | No                  | No        | No  | No  | No  | No  |
|            | Yes                 | No        | Yes | No  | No  | No  |
|            | Yes                 | No        | No  | Yes | No  | No  |
| adequate   | adequate            | adequate  | Yes | Yes | Yes | No  |
| marked de  | Marked or           | Marked or | No  | No  | No  | No  |
| moderate   | Marked or           | adequate  | No  | No  | No  | No  |
|            | No                  | No        | No  | No  | No  | No  |
| moderate   | adequate            | adequate  | No  | No  | No  | No  |
|            | No                  | Yes       | No  | Yes | No  | No  |
|            | No                  | Yes       | No  | No  | No  | No  |
|            | No                  | Yes       | No  | No  | No  | No  |
|            | No                  | No        | Yes | No  | No  | No  |
| adequate   | Marked or           | adequate  | Yes | No  | Yes | No  |
|            | No                  | Yes       | No  | No  | No  | No  |
|            | No                  | No        | No  | No  | No  | No  |
|            | No                  | No        | No  | No  | No  | No  |
| moderate   | adequate            | adequate  | Yes | No  | No  | No  |
|            | No                  | No        | No  | No  | No  | No  |
|            | No                  | No        | No  | No  | No  | No  |
|            | No                  | No        | No  | No  | No  | No  |
|            | Yes                 | No        | Yes | No  | No  | No  |
|            | Yes                 | Yes       | No  | No  | No  | No  |
|            | No                  | No        | No  | No  | No  | Yes |

|            |                     |           |     |     |     |     |     |
|------------|---------------------|-----------|-----|-----|-----|-----|-----|
|            |                     | No        | Yes | No  | No  | No  | No  |
|            |                     | No        | Yes | No  | No  | No  | No  |
|            |                     | No        | Yes | No  | No  | No  | No  |
|            |                     | No        | Yes | No  | Yes | No  | No  |
| adequate   | adequate            | adequate  | No  | No  | No  | No  | No  |
|            |                     | No        | No  | No  | No  | No  | No  |
|            |                     | No        | No  | No  | No  | No  | No  |
|            |                     | No        | No  | No  | No  | No  | No  |
| moderate   | adequate            | adequate  | No  | No  | No  | No  | No  |
| adequate   | adequate            | adequate  | No  | No  | No  | No  | No  |
| adequate   | adequate            | adequate  | No  | No  | No  | No  | No  |
|            |                     | No        | No  | No  | Yes | No  | No  |
|            |                     | No        | No  | No  | No  | No  | No  |
| moderate   | Marked or           | adequate  | Yes | No  | No  | No  | No  |
|            |                     | Yes       | No  | No  | No  | Yes | Yes |
|            |                     | No        | No  | Yes | No  | No  | No  |
|            |                     | Yes       | No  | No  | Yes | No  | No  |
| adequate   | Marked or           | adequate  | Yes | No  | No  | No  | No  |
| adequate   | Marked or           | adequate  | Yes | No  | No  | No  | No  |
| adequate   | adequate            | adequate  | No  | No  | No  | No  | No  |
|            |                     | No        | Yes | No  | No  | No  | No  |
|            |                     | Yes       | No  | No  | No  | No  | No  |
| deficiency | adequate or moderat | Yes       | Yes | No  | Yes | No  | Yes |
| moderate   | adequate            | adequate  | Yes | No  | Yes | No  | No  |
|            |                     | No        | No  | Yes | No  | No  | No  |
|            |                     | No        | No  | No  | No  | No  | No  |
|            |                     | Yes       | No  | No  | No  | No  | No  |
| marked de  | Marked or           | Marked or | Yes | No  | Yes | No  | No  |
| adequate   | adequate            | adequate  | No  | No  | Yes | No  | No  |
| moderate   | adequate            | adequate  | Yes | No  | No  | Yes | No  |
| adequate   | adequate            | adequate  | No  | Yes | No  | No  | Yes |
| adequate   | adequate            | adequate  | Yes | No  | No  | No  | No  |
|            |                     | No        | Yes | No  | No  | No  | No  |
|            |                     | No        | No  | No  | No  | No  | No  |
|            |                     | No        | Yes | No  | No  | No  | No  |
|            |                     | Yes       | No  | No  | No  | No  | No  |
| adequate   | adequate            | adequate  | Yes | No  | Yes | Yes | No  |
| moderate   | adequate            | adequate  | Yes | No  | No  | No  | No  |
|            |                     | Yes       | No  | No  | Yes | No  | No  |
| adequate   | adequate            | adequate  | No  | Yes | No  | No  | No  |
|            |                     | No        | No  | No  | No  | No  | No  |
| moderate   | adequate            | adequate  | No  | No  | No  | No  | No  |
|            |                     | No        | No  | No  | No  | No  | No  |
|            |                     | No        | No  | No  | No  | No  | No  |
|            |                     | No        | No  | No  | No  | No  | No  |
|            |                     | No        | No  | No  | Yes | No  | No  |
| moderate   | adequate            | adequate  | No  | No  | Yes | No  | No  |
| moderate   | adequate            | adequate  | No  | No  | No  | Yes | No  |
| adequate   | adequate            | adequate  | No  | No  | No  | No  | No  |
| moderate   | adequate            | adequate  | No  | Yes | No  | No  | Yes |
| moderate   | adequate            | adequate  | No  | No  | Yes | No  | No  |

|                       |                       |          |                       |          |          |          |          |     |     |
|-----------------------|-----------------------|----------|-----------------------|----------|----------|----------|----------|-----|-----|
| marked de<br>adequate | adequate              | adequate | Marked or<br>adequate | No       | No       | No       | No       | No  | No  |
|                       |                       |          |                       | No       | No       | Yes      | No       | No  | No  |
|                       |                       |          |                       | No       | No       | No       | No       | No  | No  |
|                       |                       |          |                       | No       | Yes      | No       | Yes      | No  | Yes |
|                       |                       |          |                       | No       | No       | Yes      | No       | No  | No  |
|                       |                       |          |                       | No       | Yes      | No       | No       | No  | No  |
|                       |                       |          |                       | No       | No       | Yes      | No       | No  | No  |
|                       |                       |          |                       | No       | No       | No       | No       | No  | No  |
|                       |                       |          |                       | Yes      | Yes      | Yes      | Yes      | No  | No  |
|                       |                       |          |                       | No       | Yes      | Yes      | No       | No  | No  |
|                       |                       |          |                       | Yes      | No       | Yes      | No       | No  | No  |
|                       |                       |          |                       | No       | No       | No       | No       | No  | No  |
|                       |                       |          |                       | No       | No       | No       | No       | No  | No  |
|                       |                       |          |                       | No       | No       | No       | No       | No  | No  |
|                       |                       |          |                       | No       | No       | No       | No       | No  | No  |
|                       |                       |          |                       | No       | No       | No       | No       | No  | No  |
|                       |                       |          |                       | No       | No       | No       | No       | No  | No  |
|                       |                       |          |                       | No       | No       | Yes      | No       | No  | No  |
|                       |                       |          |                       | No       | Yes      | No       | Yes      | No  | No  |
|                       |                       |          |                       | adequate | adequate | adequate | adequate | No  | No  |
| No                    | No                    | No       | No                    |          |          |          |          | No  | No  |
| No                    | Yes                   | No       | No                    |          |          |          |          | No  | No  |
| No                    | No                    | No       | No                    |          |          |          |          | No  | No  |
| No                    | No                    | No       | No                    |          |          |          |          | No  | No  |
| moderate              | adequate              | adequate | adequate              | No       | Yes      | No       | No       | No  | No  |
|                       |                       |          |                       | No       | No       | No       | No       | No  | No  |
| moderate              | Marked or<br>adequate | adequate | adequate              | No       | No       | No       | No       | No  | No  |
|                       |                       |          |                       | No       | No       | No       | No       | No  | No  |
| adequate              | adequate              | adequate | adequate              | No       | No       | No       | No       | No  | No  |
|                       |                       |          |                       | No       | Yes      | Yes      | No       | Yes | No  |
| moderate              | adequate              | adequate | adequate              | No       | No       | No       | No       | No  | No  |
|                       |                       |          |                       | Yes      | No       | No       | Yes      | No  | No  |
|                       |                       |          |                       | Yes      | No       | No       | No       | No  | No  |
|                       |                       |          |                       | Yes      | No       | No       | Yes      | Yes | Yes |
| adequate              | adequate              | adequate | adequate              | No       | No       | No       | No       | No  | No  |
|                       |                       |          |                       | No       | No       | Yes      | No       | No  | No  |
| moderate              | Marked or<br>adequate | adequate | adequate              | No       | Yes      | No       | No       | No  | No  |
|                       |                       |          |                       | No       | No       | No       | No       | No  | No  |
| moderate              | Marked or<br>adequate | adequate | adequate              | No       | No       | No       | No       | No  | No  |
|                       |                       |          |                       | No       | No       | Yes      | No       | No  | No  |
| moderate              | adequate              | adequate | adequate              | No       | No       | Yes      | No       | No  | No  |
|                       |                       |          |                       | No       | No       | Yes      | No       | No  | No  |
| adequate              | adequate              | adequate | adequate              | No       | No       | No       | No       | No  | No  |
|                       |                       |          |                       | No       | No       | No       | No       | No  | No  |
| moderate              | adequate              | adequate | adequate              | No       | No       | No       | No       | No  | No  |
|                       |                       |          |                       | No       | No       | No       | No       | No  | No  |
| moderate              | Marked or<br>adequate | adequate | adequate              | No       | No       | Yes      | No       | No  | No  |
|                       |                       |          |                       | No       | No       | No       | No       | No  | No  |
| moderate              | Marked or<br>adequate | adequate | adequate              | Yes      | No       | No       | No       | No  | No  |
|                       |                       |          |                       | No       | No       | No       | No       | No  | No  |
| adequate              | adequate              | adequate | adequate              | No       | No       | No       | No       | No  | No  |
|                       |                       |          |                       | No       | No       | No       | No       | No  | No  |
| adequate              | adequate              | adequate | adequate              | Yes      | No       | No       | No       | No  | No  |
|                       |                       |          |                       | No       | No       | No       | No       | No  | No  |
| moderate              | Marked or<br>adequate | adequate | adequate              | No       | No       | No       | No       | No  | No  |
|                       |                       |          |                       | No       | No       | No       | Yes      | Yes | No  |
| moderate              | adequate              | adequate | adequate              | No       | No       | No       | No       | No  | No  |
|                       |                       |          |                       | No       | No       | No       | No       | No  | No  |
|                       |                       |          |                       | Yes      | Yes      | No       | No       | No  | No  |
| adequate              | adequate              | adequate | adequate              | Yes      | Yes      | No       | No       | No  | No  |
|                       |                       |          |                       | No       | No       | No       | No       | No  | No  |

|            |           |           |     |     |     |     |     |
|------------|-----------|-----------|-----|-----|-----|-----|-----|
|            |           | No        | No  | Yes | No  | No  | No  |
| severe def | Marked or | Marked or | No  | No  | Yes | No  | No  |
|            |           | No        | No  | No  | No  | No  | No  |
|            |           | No        | Yes | Yes | Yes | No  | No  |
|            |           | Yes       | No  | Yes | No  | No  | No  |
|            |           | Yes       | No  | Yes | No  | No  | No  |
|            |           | Yes       | No  | No  | Yes | No  | No  |
|            |           | Yes       | No  | No  | No  | No  | No  |
|            |           | Yes       | No  | No  | Yes | No  | No  |
|            |           | Yes       | No  | No  | No  | No  | No  |
| moderate   | adequate  | adequate  | Yes | No  | Yes | No  | No  |
|            |           | Yes       | No  | No  | Yes | No  | No  |
|            |           | No        | Yes | No  | No  | No  | No  |
|            |           | Yes       | No  | Yes | Yes | No  | No  |
|            |           | Yes       | No  | No  | No  | No  | No  |
|            |           | No        | No  | Yes | No  | No  | No  |
|            |           | Yes       | No  | No  | No  | No  | No  |
|            |           | Yes       | No  | No  | No  | No  | No  |
|            |           | No        | No  | No  | Yes | No  | No  |
|            |           | No        | No  | Yes | No  | No  | No  |
|            |           | No        | No  | No  | No  | No  | No  |
|            |           | Yes       | No  | Yes | No  | No  | No  |
|            |           | Yes       | No  | Yes | No  | No  | No  |
|            |           | No        | No  | Yes | No  | No  | No  |
|            |           | No        | Yes | No  | No  | No  | Yes |
|            |           | No        | No  | Yes | No  | No  | No  |
| moderate   | adequate  | adequate  | Yes | Yes | Yes | Yes | No  |
|            |           | No        | Yes | Yes | Yes | No  | No  |
| moderate   | adequate  | adequate  | No  | Yes | No  | Yes | No  |
| adequate   | adequate  | adequate  | Yes | Yes | No  | Yes | No  |
|            |           | No        | No  | Yes | No  | No  | No  |
|            |           | No        | No  | Yes | No  | No  | No  |
|            |           | Yes       | No  | No  | Yes | No  | No  |
|            |           | No        | No  | Yes | Yes | No  | Yes |
| adequate   | Marked or | adequate  | No  | No  | No  | Yes | No  |
|            |           | No        | No  | Yes | No  | No  | No  |
|            |           | No        | Yes | Yes | Yes | No  | No  |
|            |           | No        | No  | Yes | Yes | No  | No  |
|            |           | Yes       | No  | Yes | Yes | No  | No  |
|            |           | No        | No  | No  | Yes | No  | No  |
|            |           | No        | No  | No  | Yes | No  | No  |
|            |           | No        | No  | No  | Yes | No  | No  |
|            |           | No        | No  | No  | Yes | No  | No  |
|            |           | No        | Yes | No  | Yes | No  | No  |
| moderate   | adequate  | adequate  | No  | Yes | No  | Yes | No  |
|            |           | No        | No  | No  | No  | No  | No  |
| marked de  | Marked or | Marked or | Yes | Yes | No  | No  | No  |
|            |           | No        | No  | No  | No  | No  | Yes |
|            |           | No        | No  | No  | No  | No  | No  |
|            |           | No        | No  | No  | Yes | No  | No  |
|            |           | No        | No  | No  | Yes | No  | No  |

|            |           |                     |     |     |     |     |     |
|------------|-----------|---------------------|-----|-----|-----|-----|-----|
|            |           | No                  | No  | No  | No  | No  | No  |
|            |           | No                  | No  | No  | Yes | No  | No  |
|            |           | No                  | No  | No  | No  | No  | No  |
| adequate   | adequate  | adequate            | No  | No  | Yes | No  | No  |
| marked de  | Marked or | Marked or           | No  | No  | No  | No  | No  |
| moderate   | adequate  | adequate            | No  | No  | No  | No  | No  |
| adequate   | adequate  | adequate            | No  | No  | Yes | No  | No  |
| adequate   | adequate  | adequate            | Yes | Yes | Yes | No  | No  |
|            |           | No                  | No  | Yes | No  | No  | No  |
| moderate   | Marked or | adequate            | Yes | Yes | Yes | No  | Yes |
| ciency     | Marked or | severe              | No  | No  | No  | No  | No  |
|            |           | No                  | Yes | No  | Yes | No  | No  |
|            |           | No                  | No  | Yes | No  | No  | No  |
| marked de  | Marked or | Marked or           | No  | No  | No  | No  | No  |
|            |           | No                  | No  | No  | No  | No  | No  |
|            |           | No                  | No  | No  | No  | No  | No  |
|            |           | No                  | No  | No  | No  | Yes | No  |
| marked de  | Marked or | Marked or           | No  | Yes | No  | No  | No  |
| moderate   | adequate  | adequate            | No  | Yes | No  | No  | No  |
| adequate   | adequate  | adequate            | No  | Yes | No  | No  | No  |
| moderate   | Marked or | adequate            | No  | Yes | No  | No  | No  |
| severe def | Marked or | Marked or           | No  | No  | Yes | No  | No  |
| moderate   | Marked or | adequate            | Yes | Yes | Yes | No  | No  |
| moderate   | Marked or | adequate            | No  | No  | No  | No  | No  |
|            |           | No                  | No  | No  | No  | No  | No  |
|            |           | No                  | No  | No  | No  | No  | No  |
| moderate   | Marked or | adequate            | No  | Yes | Yes | No  | No  |
| adequate   | adequate  | adequate            | No  | Yes | No  | No  | No  |
| adequate   | adequate  | adequate            | Yes | No  | No  | No  | No  |
| moderate   | Marked or | adequate            | No  | No  | Yes | No  | No  |
|            |           | No                  | No  | Yes | No  | No  | No  |
|            |           | Yes                 | No  | No  | No  | No  | No  |
|            |           | No                  | Yes | No  | No  | No  | No  |
| adequate   | adequate  | adequate            | No  | Yes | No  | No  | No  |
| moderate   | adequate  | adequate            | No  | No  | No  | Yes | No  |
| moderate   | adequate  | adequate            | No  | No  | No  | No  | Yes |
| adequate   | adequate  | adequate            | Yes | No  | Yes | No  | No  |
|            |           | Yes                 | No  | No  | No  | No  | No  |
| moderate   | adequate  | adequate            | Yes | No  | No  | No  | Yes |
| adequate   | adequate  | adequate            | No  | No  | No  | Yes | No  |
| moderate   | adequate  | adequate            | Yes | No  | Yes | Yes | No  |
| moderate   | adequate  | adequate            | Yes | No  | Yes | No  | No  |
| moderate   | adequate  | adequate            | No  | No  | Yes | Yes | No  |
|            |           | Yes                 | No  | No  | Yes | No  | No  |
| moderate   | Marked or | adequate            | No  | Yes | No  | No  | No  |
| moderate   | adequate  | adequate            | No  | No  | No  | No  | No  |
| moderate   | Marked or | adequate            | No  | No  | Yes | No  | No  |
|            |           | adequate or moderat | Yes | No  | No  | No  | No  |
|            |           | Yes                 | No  | No  | No  | No  | No  |
| moderate   | adequate  | adequate            | No  | No  | No  | No  | No  |
| adequate   | adequate  | adequate            | Yes | Yes | No  | No  | No  |

|            |                      |          |     |     |     |     |     |
|------------|----------------------|----------|-----|-----|-----|-----|-----|
|            |                      | No       | No  | No  | Yes | No  | No  |
| moderate   | Marked or adequate   | Yes      | No  | Yes | No  | No  | No  |
| adequate   | Marked or adequate   | No       | Yes | No  | Yes | No  | No  |
| moderate   | Marked or adequate   | Yes      | No  | No  | No  | No  | No  |
| adequate   | adequate             | adequate | No  | Yes | No  | No  | Yes |
| moderate   | adequate             | adequate | Yes | No  | Yes | No  | No  |
| moderate   | Marked or adequate   | Yes      | No  | No  | Yes | No  | No  |
| deficiency | adequate or moderate | No       | No  | No  | No  | No  | No  |
| moderate   | adequate             | adequate | No  | Yes | No  | No  | No  |
| marked de  | Marked or Marked or  | Yes      | No  | No  | No  | No  | Yes |
| adequate   | Marked or adequate   | Yes      | No  | No  | No  | No  | No  |
| moderate   | Marked or adequate   | No       | No  | No  | No  | No  | Yes |
| moderate   | adequate             | adequate | No  | No  | No  | No  | No  |
| adequate   | adequate             | adequate | Yes | No  | No  | No  | No  |
| adequate   | adequate             | adequate | No  | No  | Yes | Yes | No  |
| moderate   | adequate             | adequate | No  | No  | No  | Yes | No  |
| moderate   | adequate             | adequate | No  | Yes | Yes | No  | No  |
| moderate   | Marked or adequate   | No       | No  | No  | No  | No  | No  |
| adequate   | adequate             | adequate | Yes | No  | No  | No  | No  |
| moderate   | adequate             | adequate | Yes | No  | No  | No  | No  |
| moderate   | adequate             | adequate | No  | No  | Yes | No  | No  |
| moderate   | Marked or adequate   | Yes      | No  | No  | Yes | No  | No  |
|            |                      | No       | No  | No  | No  | No  | No  |
| adequate   | adequate             | adequate | No  | No  | No  | No  | No  |
|            |                      | No       | Yes | No  | No  | No  | No  |
| moderate   | adequate             | adequate | No  | No  | Yes | No  | No  |
|            |                      | No       | No  | No  | No  | No  | No  |
|            |                      | No       | No  | No  | No  | No  | No  |
| adequate   | adequate             | adequate | No  | No  | Yes | No  | No  |
|            |                      | No       | No  | No  | Yes | No  | No  |
| ciency     | Marked or severe     | No       | No  | No  | No  | No  | No  |
| adequate   | Marked or adequate   | Yes      | No  | No  | No  | No  | No  |
| moderate   | adequate             | adequate | No  | No  | Yes | Yes | No  |
| moderate   | adequate             | adequate | No  | No  | No  | Yes | No  |
|            |                      | No       | No  | Yes | Yes | No  | No  |
| deficiency | adequate or moderate | No       | No  | Yes | No  | No  | No  |
| ciency     | Marked or severe     | No       | No  | Yes | No  | No  | No  |
| moderate   | adequate             | adequate | No  | No  | Yes | Yes | No  |
|            |                      | No       | No  | No  | No  | No  | No  |
| moderate   | Marked or adequate   | No       | No  | No  | No  | No  | No  |
| adequate   | adequate             | adequate | No  | No  | Yes | Yes | No  |
|            |                      | No       | No  | No  | No  | No  | No  |
| moderate   | adequate             | adequate | No  | No  | No  | No  | No  |
|            |                      | No       | No  | No  | Yes | No  | No  |
| adequate   | adequate             | adequate | No  | No  | No  | Yes | No  |
| severe def | Marked or Marked or  | No       | No  | No  | Yes | No  | No  |
| adequate   | adequate             | adequate | No  | No  | No  | Yes | No  |
| moderate   | Marked or adequate   | No       | No  | No  | No  | No  | No  |
| adequate   | adequate             | adequate | No  | Yes | No  | No  | No  |
|            |                      | No       | No  | No  | Yes | No  | Yes |
|            |                      | No       | No  | No  | Yes | No  | No  |

|           |                    |           |     |     |     |     |
|-----------|--------------------|-----------|-----|-----|-----|-----|
| moderate  | Marked or adequate | No        | No  | No  | No  | No  |
|           | Yes                | No        | No  | No  | No  | No  |
|           | Yes                | No        | Yes | No  | No  | Yes |
|           | Yes                | Yes       | No  | No  | Yes | Yes |
|           | Yes                | Yes       | No  | No  | No  | No  |
|           | Yes                | No        | No  | No  | Yes | No  |
|           | Yes                | No        | No  | No  | Yes | Yes |
|           | Yes                | No        | No  | Yes | No  | No  |
|           | Yes                | No        | Yes | No  | No  | No  |
|           | No                 | No        | No  | No  | No  | No  |
|           | Yes                | No        | Yes | No  | No  | No  |
|           | Yes                | Yes       | No  | Yes | No  | No  |
|           | No                 | No        | Yes | No  | No  | No  |
|           | No                 | No        | No  | No  | No  | No  |
|           | No                 | No        | No  | No  | No  | Yes |
| moderate  | adequate           | adequate  | No  | No  | Yes | No  |
|           | No                 | No        | Yes | Yes | No  | No  |
|           | No                 | No        | No  | Yes | No  | No  |
|           | No                 | Yes       | No  | No  | No  | No  |
| moderate  | adequate           | adequate  | No  | No  | No  | Yes |
|           | No                 | No        | Yes | Yes | No  | Yes |
| adequate  | adequate           | adequate  | Yes | Yes | No  | No  |
|           | No                 | No        | No  | No  | No  | No  |
|           | Yes                | No        | No  | Yes | No  | No  |
| moderate  | Marked or adequate | No        | No  | No  | No  | No  |
| adequate  | adequate           | adequate  | Yes | Yes | Yes | No  |
|           | No                 | No        | No  | No  | No  | No  |
|           | No                 | Yes       | Yes | Yes | No  | No  |
|           | No                 | No        | Yes | Yes | No  | No  |
| adequate  | Marked or adequate | No        | Yes | No  | Yes | No  |
| adequate  | adequate           | adequate  | Yes | No  | No  | No  |
| moderate  | adequate           | adequate  | No  | No  | Yes | No  |
| adequate  | adequate           | adequate  | No  | No  | No  | No  |
|           | No                 | No        | No  | No  | No  | No  |
| moderate  | Marked or adequate | Yes       | No  | No  | No  | No  |
|           | No                 | Yes       | Yes | No  | No  | No  |
| adequate  | Marked or adequate | Yes       | No  | No  | No  | No  |
| adequate  | adequate           | adequate  | Yes | No  | No  | No  |
| marked de | Marked or          | Marked or | Yes | Yes | No  | No  |
|           | Yes                | No        | No  | No  | No  | No  |
| moderate  | adequate           | adequate  | No  | No  | No  | No  |
| adequate  | adequate           | adequate  | Yes | No  | No  | No  |
|           | Yes                | No        | Yes | No  | No  | No  |
| moderate  | Marked or adequate | Yes       | Yes | No  | No  | Yes |
| moderate  | adequate           | adequate  | Yes | Yes | No  | No  |
|           | No                 | No        | Yes | No  | No  | No  |
| adequate  | adequate           | adequate  | Yes | Yes | No  | No  |
| adequate  | adequate           | adequate  | Yes | Yes | No  | No  |
| adequate  | adequate           | adequate  | No  | No  | No  | No  |
| adequate  | adequate           | adequate  | Yes | No  | No  | No  |
| moderate  | Marked or adequate | Yes       | No  | No  | No  | No  |

|            |                     |     |     |     |     |     |     |
|------------|---------------------|-----|-----|-----|-----|-----|-----|
|            |                     | Yes | No  | No  | No  | No  | Yes |
| moderate   | Marked or adequate  | No  | Yes | No  | No  | No  | No  |
|            |                     | Yes | Yes | No  | Yes | Yes | No  |
|            |                     | Yes | Yes | No  | No  | No  | Yes |
|            |                     | No  | Yes | No  | No  | No  | No  |
|            |                     | Yes | Yes | No  | No  | No  | No  |
|            |                     | No  | No  | No  | No  | No  | No  |
|            |                     | No  | No  | No  | No  | No  | No  |
| marked de  | Marked or Marked or | No  | No  | Yes | No  | No  | No  |
| moderate   | adequate            | No  | No  | Yes | No  | No  | No  |
|            |                     | No  | No  | No  | No  | No  | No  |
|            |                     | No  | Yes | Yes | No  | No  | No  |
|            |                     | Yes | No  | No  | No  | No  | No  |
| adequate   | adequate            | Yes | No  | No  | No  | No  | No  |
|            |                     | Yes | No  | No  | Yes | No  | No  |
|            |                     | No  | No  | No  | No  | No  | No  |
|            |                     | No  | Yes | No  | Yes | No  | No  |
| moderate   | adequate            | No  | No  | No  | No  | No  | No  |
| deficiency | adequate or moderat | Yes | No  | No  | No  | No  | No  |
| moderate   | Marked or adequate  | Yes | No  | No  | No  | No  | No  |
|            |                     | No  | No  | Yes | No  | No  | No  |
| moderate   | Marked or adequate  | No  | No  | No  | No  | No  | No  |
| moderate   | adequate            | Yes | Yes | No  | No  | No  | No  |
| marked de  | Marked or Marked or | No  | No  | No  | No  | No  | No  |
| adequate   | adequate            | Yes | No  | No  | Yes | No  | No  |
| moderate   | adequate            | No  | No  | No  | Yes | No  | No  |
| adequate   | adequate            | Yes | No  | Yes | No  | No  | No  |
|            |                     | No  | No  | No  | Yes | No  | No  |
| moderate   | adequate            | No  | No  | No  | No  | No  | No  |
| moderate   | adequate            | No  | No  | Yes | No  | No  | No  |
|            |                     | No  | No  | No  | No  | No  | No  |
| adequate   | adequate            | No  | No  | Yes | No  | No  | No  |
| adequate   | adequate            | No  | No  | No  | No  | No  | No  |
| adequate   | adequate            | No  | No  | No  | No  | No  | No  |
|            |                     | No  | No  | Yes | No  | No  | No  |
| moderate   | adequate            | No  | No  | Yes | No  | Yes | Yes |
| adequate   | adequate            | No  | No  | Yes | No  | No  | No  |



| diar_exit | fever_exit | los | los_cat      |
|-----------|------------|-----|--------------|
| No        | Yes        | 21  | los<8 weeks  |
| No        | No         | 70  | los>=8 weeks |
| No        | Yes        | 112 | los>=8 weeks |
| No        | No         | 112 | los>=8 weeks |
| Yes       | No         | 112 | los>=8 weeks |
| No        | No         | 91  | los>=8 weeks |
| No        | No         | 49  | los<8 weeks  |
| No        | No         | 112 | los>=8 weeks |
| Yes       | No         | 7   |              |
| No        | No         | 112 | los>=8 weeks |
| No        | No         | 77  | los>=8 weeks |
| No        | No         | 84  | los>=8 weeks |
| No        | No         | 112 | los>=8 weeks |
| No        | No         | 28  | los<8 weeks  |
| No        | No         | 63  | los>=8 weeks |
| No        | No         | 28  | los<8 weeks  |
| No        | No         | 28  | los<8 weeks  |
| No        | Yes        | 49  | los<8 weeks  |
| No        | No         | 42  | los<8 weeks  |
| No        | No         | 28  | los<8 weeks  |
| No        | No         | 42  | los<8 weeks  |
| No        | No         | 49  | los<8 weeks  |
| No        | No         | 49  | los<8 weeks  |
| No        | No         | 70  | los>=8 weeks |
| No        | No         | 7   | los<8 weeks  |
| No        | No         | 63  | los>=8 weeks |
| No        | No         | 98  | los>=8 weeks |
| No        | No         | 28  | los<8 weeks  |
| No        | No         | 49  | los<8 weeks  |
| No        | Yes        | 112 | los>=8 weeks |
| No        | No         | 28  | los<8 weeks  |
| No        | No         | 105 | los>=8 weeks |
| No        | No         | 56  | los>=8 weeks |
| No        | No         | 70  | los>=8 weeks |
| No        | No         | 70  | los>=8 weeks |
| No        | No         | 21  | los<8 weeks  |
| No        | No         | 49  | los<8 weeks  |
| No        | No         | 84  | los>=8 weeks |
| No        | No         | 63  | los>=8 weeks |
| No        | No         | 112 | los>=8 weeks |
| No        | No         | 21  | los<8 weeks  |
| No        | No         | 35  | los<8 weeks  |
| No        | No         | 84  | los>=8 weeks |
| No        | No         | 7   | los<8 weeks  |
| No        | No         | 63  | los>=8 weeks |
| No        | No         | 21  | los<8 weeks  |
| Yes       | No         | 112 | los>=8 weeks |
| No        | No         | 63  | los>=8 weeks |
| No        | No         | 112 | los>=8 weeks |
| No        | No         | 28  | los<8 weeks  |

|     |     |                  |
|-----|-----|------------------|
| No  | No  | 35 los<8 weeks   |
| No  | No  | 42 los<8 weeks   |
| No  | No  | 35 los<8 weeks   |
| No  | No  | 56 los>=8 weeks  |
| No  | No  | 77 los>=8 weeks  |
| No  | No  | 112 los>=8 weeks |
| No  | No  | 42 los<8 weeks   |
| No  | Yes | 14 los<8 weeks   |
| Yes | No  | 7 los<8 weeks    |
| No  | No  | 70 los>=8 weeks  |
| No  | No  | 112 los>=8 weeks |
| No  | No  | 112 los>=8 weeks |
| No  | No  | 112 los>=8 weeks |
| No  | No  | 14 los<8 weeks   |
| No  | No  | 63 los>=8 weeks  |
| No  | No  | 91 los>=8 weeks  |
| No  | No  | 35 los<8 weeks   |
| No  | No  | 70 los>=8 weeks  |
| No  | No  | 28 los<8 weeks   |
| No  | No  | 28 los<8 weeks   |
| No  | No  | 91 los>=8 weeks  |
| No  | No  | 56 los>=8 weeks  |
| No  | No  | 49 los<8 weeks   |
| No  | No  | 21 los<8 weeks   |
| Yes | No  | 112 los>=8 weeks |
| No  | No  | 105 los>=8 weeks |
| No  | No  | 112 los>=8 weeks |
| No  | No  | 63 los>=8 weeks  |
| No  | No  | 49 los<8 weeks   |
| No  | No  | 42 los<8 weeks   |
| No  | No  | 0                |
| No  | No  | 112 los>=8 weeks |
| No  | No  | 42 los<8 weeks   |
| No  | Yes | 84 los>=8 weeks  |
| No  | No  | 70 los>=8 weeks  |
| No  | No  | 112 los>=8 weeks |
| No  | No  | 56 los>=8 weeks  |
| No  | No  | 56 los>=8 weeks  |
| No  | No  | 56 los>=8 weeks  |
| No  | No  | 112 los>=8 weeks |
| No  | No  | 7 los<8 weeks    |
| No  | No  | 28 los<8 weeks   |
| No  | No  | 35 los<8 weeks   |
| Yes | No  | 0                |
| No  | No  | 49 los<8 weeks   |
| No  | No  | 28 los<8 weeks   |
| No  | No  | 98 los>=8 weeks  |
| No  | No  | 70 los>=8 weeks  |
| No  | No  | 63 los>=8 weeks  |
| No  | No  | 70 los>=8 weeks  |
| No  | No  | 77 los>=8 weeks  |

|     |     |                  |
|-----|-----|------------------|
| No  | No  | 56 los>=8 weeks  |
| No  | No  | 35 los<8 weeks   |
| No  | No  | 35 los<8 weeks   |
| No  | No  | 28 los<8 weeks   |
| No  | No  | 28 los<8 weeks   |
| No  | No  | 70 los>=8 weeks  |
| No  | No  | 112 los>=8 weeks |
| No  | No  | 91 los>=8 weeks  |
| No  | No  | 77 los>=8 weeks  |
| No  | No  | 63 los>=8 weeks  |
| No  | No  | 42 los<8 weeks   |
| No  | No  | 112 los>=8 weeks |
| No  | No  | 42 los<8 weeks   |
| No  | Yes | 56 los>=8 weeks  |
| No  | No  | 49 los<8 weeks   |
| No  | No  | 98 los>=8 weeks  |
| No  | No  | 112 los>=8 weeks |
| No  | No  | 112 los>=8 weeks |
| No  | No  | 77 los>=8 weeks  |
| No  | No  | 84 los>=8 weeks  |
| No  | No  | 28 los<8 weeks   |
| No  | No  | 35 los<8 weeks   |
| No  | No  | 77 los>=8 weeks  |
| No  | No  | 56 los>=8 weeks  |
| No  | No  | 63 los>=8 weeks  |
| No  | No  | 105 los>=8 weeks |
| No  | No  | 21 los<8 weeks   |
| Yes | Yes | 28 los<8 weeks   |
| No  | No  | 56 los>=8 weeks  |
| No  | No  | 91 los>=8 weeks  |
| No  | No  | 91 los>=8 weeks  |
| No  | No  | 112 los>=8 weeks |
| No  | No  | 77 los>=8 weeks  |
| No  | No  | 28 los<8 weeks   |
| No  | No  | 70 los>=8 weeks  |
| No  | No  | 70 los>=8 weeks  |
| No  | No  | 49 los<8 weeks   |
| No  | No  | 105 los>=8 weeks |
| No  | No  | 21 los<8 weeks   |
| No  | No  | 28 los<8 weeks   |
| No  | No  | 112 los>=8 weeks |
| No  | No  | 56 los>=8 weeks  |
| No  | No  | 112 los>=8 weeks |
| No  | No  | 28 los<8 weeks   |
| No  | No  | 28 los<8 weeks   |
| No  | No  | 28 los<8 weeks   |
| No  | No  | 14 los<8 weeks   |
| No  | No  | 91 los>=8 weeks  |
| No  | No  | 56 los>=8 weeks  |
| No  | No  | 105 los>=8 weeks |
| No  | No  | 21 los<8 weeks   |

|     |     |                  |
|-----|-----|------------------|
| No  | No  | 49 los<8 weeks   |
| No  | No  | 112 los>=8 weeks |
| No  | Yes | 42 los<8 weeks   |
| Yes | No  | 112 los>=8 weeks |
| No  | No  | 112 los>=8 weeks |
| No  | No  | 21 los<8 weeks   |
| No  | No  | 42 los<8 weeks   |
| No  | No  | 56 los>=8 weeks  |
| No  | No  | 21 los<8 weeks   |
| No  | Yes | 56 los>=8 weeks  |
| No  | No  | 21 los<8 weeks   |
| No  | Yes | 49 los<8 weeks   |
| No  | Yes | 35 los<8 weeks   |
| No  | No  | 35 los<8 weeks   |
| No  | No  | 35 los<8 weeks   |
| No  | No  | 28 los<8 weeks   |
| No  | No  | 91 los>=8 weeks  |
| No  | No  | 28 los<8 weeks   |
| No  | No  | 35 los<8 weeks   |
| No  | No  | 112 los>=8 weeks |
| No  | No  | 35 los<8 weeks   |
| No  | No  | 42 los<8 weeks   |
| No  | No  | 56 los>=8 weeks  |
| No  | No  | 105 los>=8 weeks |
| No  | No  | 112 los>=8 weeks |
| No  | No  | 84 los>=8 weeks  |
| No  | No  | 42 los<8 weeks   |
| No  | No  | 35 los<8 weeks   |
| No  | No  | 49 los<8 weeks   |
| Yes | No  | 112 los>=8 weeks |
| No  | No  | 84 los>=8 weeks  |
| No  | No  | 35 los<8 weeks   |
| No  | No  | 84 los>=8 weeks  |
| No  | No  | 35 los<8 weeks   |
| Yes | No  | 112 los>=8 weeks |
| No  | No  | 119 los>=8 weeks |
| No  | No  | 42 los<8 weeks   |
| No  | No  | 70 los>=8 weeks  |
| No  | No  | 49 los<8 weeks   |
| No  | No  | 35 los<8 weeks   |
| No  | No  | 105 los>=8 weeks |
| No  | No  | 98 los>=8 weeks  |
| No  | No  | 42 los<8 weeks   |
| No  | No  | 56 los>=8 weeks  |
| No  | No  | 84 los>=8 weeks  |
| No  | No  | 42 los<8 weeks   |
| No  | No  | 112 los>=8 weeks |
| No  | No  | 7 los<8 weeks    |
| No  | No  | 14 los<8 weeks   |
| No  | No  | 112 los>=8 weeks |
| No  | No  | 49 los<8 weeks   |

|     |     |                  |
|-----|-----|------------------|
| No  | No  | 42 los<8 weeks   |
| No  | No  | 49 los<8 weeks   |
| No  | No  | 98 los>=8 weeks  |
| No  | No  | 14 los<8 weeks   |
| No  | No  | 70 los>=8 weeks  |
| No  | No  | 42 los<8 weeks   |
| No  | No  | 98 los>=8 weeks  |
| No  | No  | 21 los<8 weeks   |
| Yes | Yes | 70 los>=8 weeks  |
| Yes | No  | 112 los>=8 weeks |
| No  | Yes | 98 los>=8 weeks  |
| Yes | Yes | 93 los>=8 weeks  |
| No  | No  | 56 los>=8 weeks  |
| Yes | Yes | 7 los<8 weeks    |
| No  | No  | 84 los>=8 weeks  |
| No  | No  | 42 los<8 weeks   |
| No  | No  | 28 los<8 weeks   |
| No  | No  | 63 los>=8 weeks  |
| Yes | No  | 70 los>=8 weeks  |
| No  | No  | 49 los<8 weeks   |
| Yes | Yes | 35 los<8 weeks   |
| No  | No  | 35 los<8 weeks   |
| No  | No  | 70 los>=8 weeks  |
| No  | No  | 28 los<8 weeks   |
| No  | No  | 70 los>=8 weeks  |
| No  | No  | 112 los>=8 weeks |
| No  | No  | 63 los>=8 weeks  |
| No  | No  | 84 los>=8 weeks  |
| No  | No  | 42 los<8 weeks   |
| No  | No  | 70 los>=8 weeks  |
| No  | No  | 14 los<8 weeks   |
| No  | No  | 98 los>=8 weeks  |
| No  | No  | 77 los>=8 weeks  |
| No  | No  | 42 los<8 weeks   |
| No  | No  | 56 los>=8 weeks  |
| No  | No  | 0                |
| No  | No  | 42 los<8 weeks   |
| No  | No  | 105 los>=8 weeks |
| No  | No  | 84 los>=8 weeks  |
| No  | No  | 112 los>=8 weeks |
| No  | No  | 35 los<8 weeks   |
| No  | No  | 70 los>=8 weeks  |
| No  | No  | 42 los<8 weeks   |
| No  | No  | 7 los<8 weeks    |
| No  | No  | 49 los<8 weeks   |
| No  | Yes | 0                |
| No  | No  | 77 los>=8 weeks  |
| No  | No  | 42 los<8 weeks   |
| No  | No  | 28 los<8 weeks   |
| No  | No  | 42 los<8 weeks   |
| No  | No  | 84 los>=8 weeks  |

|     |     |                  |
|-----|-----|------------------|
| No  | No  | 49 los<8 weeks   |
| No  | No  | 84 los>=8 weeks  |
| No  | No  | 105 los>=8 weeks |
| No  | No  | 105 los>=8 weeks |
| No  | No  | 41 los<8 weeks   |
| No  | No  | 35 los<8 weeks   |
| No  | No  | 21 los<8 weeks   |
| No  | No  | 21 los<8 weeks   |
| No  | No  | 28 los<8 weeks   |
| No  | No  | 42 los<8 weeks   |
| No  | No  | 112 los>=8 weeks |
| No  | No  | 35 los<8 weeks   |
| No  | No  | 112 los>=8 weeks |
| No  | No  | 42 los<8 weeks   |
| No  | No  | 35 los<8 weeks   |
| No  | No  | 56 los>=8 weeks  |
| No  | No  | 70 los>=8 weeks  |
| No  | No  | 49 los<8 weeks   |
| No  | No  | 21 los<8 weeks   |
| No  | No  | 56 los>=8 weeks  |
| No  | No  | 77 los>=8 weeks  |
| No  | No  | 56 los>=8 weeks  |
| No  | Yes | 14 los<8 weeks   |
| No  | No  | 21 los<8 weeks   |
| No  | No  | 63 los>=8 weeks  |
| No  | No  | 112 los>=8 weeks |
| No  | No  | 28 los<8 weeks   |
| No  | No  | 63 los>=8 weeks  |
| No  | Yes | 35 los<8 weeks   |
| No  | No  | 42 los<8 weeks   |
| No  | No  | 70 los>=8 weeks  |
| No  | No  | 35 los<8 weeks   |
| No  | No  | 28 los<8 weeks   |
| No  | No  | 49 los<8 weeks   |
| No  | No  | 105 los>=8 weeks |
| No  | No  | 49 los<8 weeks   |
| No  | No  | 35 los<8 weeks   |
| No  | No  | 35 los<8 weeks   |
| No  | No  | 105 los>=8 weeks |
| No  | No  | 112 los>=8 weeks |
| No  | Yes | 21 los<8 weeks   |
| No  | No  | 35 los<8 weeks   |
| No  | No  | 105 los>=8 weeks |
| No  | No  | 98 los>=8 weeks  |
| No  | No  | 98 los>=8 weeks  |
| No  | No  | 28 los<8 weeks   |
| No  | No  | 112 los>=8 weeks |
| No  | No  | 112 los>=8 weeks |
| Yes | Yes | 7 los<8 weeks    |
| No  | No  | 28 los<8 weeks   |
| No  | No  | 112 los>=8 weeks |

|    |     |                  |
|----|-----|------------------|
| No | No  | 49 los<8 weeks   |
| No | No  | 84 los>=8 weeks  |
| No | No  | 42 los<8 weeks   |
| No | No  | 42 los<8 weeks   |
| No | No  | 112 los>=8 weeks |
| No | No  | 21 los<8 weeks   |
| No | No  | 70 los>=8 weeks  |
| No | No  | 70 los>=8 weeks  |
| No | No  | 28 los<8 weeks   |
| No | No  | 56 los>=8 weeks  |
| No | No  | 91 los>=8 weeks  |
| No | No  | 56 los>=8 weeks  |
| No | No  | 21 los<8 weeks   |
| No | No  | 35 los<8 weeks   |
| No | No  | 105 los>=8 weeks |
| No | No  | 56 los>=8 weeks  |
| No | No  | 28 los<8 weeks   |
| No | No  | 28 los<8 weeks   |
| No | No  | 42 los<8 weeks   |
| No | Yes | 7                |
| No | No  | 112 los>=8 weeks |
| No | No  | 70 los>=8 weeks  |
| No | No  | 63 los>=8 weeks  |
| No | No  | 49 los<8 weeks   |
| No | No  | 35 los<8 weeks   |
| No | No  | 14 los<8 weeks   |
| No | No  | 70 los>=8 weeks  |
| No | No  | 112 los>=8 weeks |
| No | No  | 84 los>=8 weeks  |
| No | No  | 77 los>=8 weeks  |
| No | No  | 105 los>=8 weeks |
| No | No  | 112 los>=8 weeks |
| No | No  | 105 los>=8 weeks |
| No | No  | 21 los<8 weeks   |
| No | No  | 28 los<8 weeks   |
| No | No  | 42 los<8 weeks   |
| No | No  | 21 los<8 weeks   |
| No | No  | 21 los<8 weeks   |
| No | No  | 105 los>=8 weeks |
| No | No  | 63 los>=8 weeks  |
| No | No  | 112 los>=8 weeks |
| No | No  | 42 los<8 weeks   |
| No | No  | 28 los<8 weeks   |
| No | No  | 77 los>=8 weeks  |
| No | No  | 77 los>=8 weeks  |
| No | No  | 21 los<8 weeks   |
| No | No  | 49 los<8 weeks   |
| No | No  | 105 los>=8 weeks |
| No | No  | 56 los>=8 weeks  |
| No | No  | 35 los<8 weeks   |
| No | No  | 21 los<8 weeks   |

|     |     |                  |
|-----|-----|------------------|
| No  | No  | 42 los<8 weeks   |
| No  | No  | 21 los<8 weeks   |
| No  | No  | 28 los<8 weeks   |
| No  | No  | 28 los<8 weeks   |
| No  | No  | 105 los>=8 weeks |
| No  | No  | 28 los<8 weeks   |
| No  | No  | 56 los>=8 weeks  |
| No  | No  | 7 los<8 weeks    |
| No  | No  | 105 los>=8 weeks |
| Yes | No  | 35 los<8 weeks   |
| No  | No  | 28 los<8 weeks   |
| No  | No  | 112 los>=8 weeks |
| Yes | Yes | 49 los<8 weeks   |
| No  | No  | 42 los<8 weeks   |
| No  | No  | 112 los>=8 weeks |
| No  | No  | 77 los>=8 weeks  |
| No  | No  | 70 los>=8 weeks  |
| No  | No  | 112 los>=8 weeks |
| No  | No  | 98 los>=8 weeks  |
| No  | No  | 77 los>=8 weeks  |
| No  | No  | 42 los<8 weeks   |
| No  | No  | 28 los<8 weeks   |
| No  | No  | 42 los<8 weeks   |
| No  | No  | 105 los>=8 weeks |
| No  | No  | 21 los<8 weeks   |
| No  | No  | 21 los<8 weeks   |
| No  | No  | 49 los<8 weeks   |
| No  | No  | 112 los>=8 weeks |
| No  | No  | 112 los>=8 weeks |
| No  | No  | 35 los<8 weeks   |
| No  | No  | 21 los<8 weeks   |
| No  | No  | 70 los>=8 weeks  |
| No  | No  | 35 los<8 weeks   |
| No  | No  | 49 los<8 weeks   |
| No  | No  | 77 los>=8 weeks  |
| No  | No  | 105 los>=8 weeks |
| No  | No  | 91 los>=8 weeks  |
| No  | No  | 112 los>=8 weeks |
| No  | No  | 49 los<8 weeks   |
| No  | Yes | 112 los>=8 weeks |
| No  | Yes | 112 los>=8 weeks |
| No  | No  | 14 los<8 weeks   |
| No  | No  | 77 los>=8 weeks  |
| No  | No  | 14 los<8 weeks   |
| No  | No  | 28 los<8 weeks   |
| No  | No  | 49 los<8 weeks   |
| No  | No  | 98 los>=8 weeks  |
| No  | No  | 21 los<8 weeks   |
| No  | No  | 42 los<8 weeks   |
| Yes | No  | 112 los>=8 weeks |
| No  | No  | 7 los<8 weeks    |



|     |     |                  |
|-----|-----|------------------|
| No  | Yes | 28 los<8 weeks   |
| No  | No  | 28 los<8 weeks   |
| No  | No  | 98 los>=8 weeks  |
| No  | No  | 84 los>=8 weeks  |
| No  | No  | 35 los<8 weeks   |
| No  | No  | 35 los<8 weeks   |
| No  | Yes | 105 los>=8 weeks |
| No  | No  | 28 los<8 weeks   |
| No  | No  | 70 los>=8 weeks  |
| No  | No  | 112 los>=8 weeks |
| No  | No  | 70 los>=8 weeks  |
| No  | No  | 119 los>=8 weeks |
| No  | No  | 63 los>=8 weeks  |
| No  | No  | 0                |
| No  | No  | 21 los<8 weeks   |
| Yes | Yes | 77 los>=8 weeks  |
| No  | No  | 84 los>=8 weeks  |
| No  | No  | 7 los<8 weeks    |
| No  | No  | 91 los>=8 weeks  |
| No  | No  | 28 los<8 weeks   |
| No  | No  | 84 los>=8 weeks  |
| No  | No  | 49 los<8 weeks   |
| No  | No  | 112 los>=8 weeks |
| No  | No  | 112 los>=8 weeks |
| No  | No  | 77 los>=8 weeks  |
| No  | No  | 105 los>=8 weeks |
| No  | No  | 112 los>=8 weeks |
| No  | No  | 42 los<8 weeks   |
| No  | No  | 49 los<8 weeks   |
| No  | No  | 35 los<8 weeks   |
| No  | No  | 14 los<8 weeks   |
| No  | No  | 35 los<8 weeks   |
| No  | No  | 42 los<8 weeks   |
| No  | No  | 21 los<8 weeks   |
| No  | No  | 42 los<8 weeks   |
| No  | No  | 35 los<8 weeks   |
| No  | No  | 14 los<8 weeks   |
| No  | No  | 112 los>=8 weeks |
| No  | No  | 112 los>=8 weeks |
| No  | No  | 98 los>=8 weeks  |
| No  | No  | 56 los>=8 weeks  |
| No  | No  | 84 los>=8 weeks  |
| No  | No  | 112 los>=8 weeks |
| No  | No  | 91 los>=8 weeks  |
| No  | No  | 112 los>=8 weeks |
| Yes | Yes | 7 los<8 weeks    |
| No  | No  | 7 los<8 weeks    |
| No  | No  | 105 los>=8 weeks |
| Yes | No  | 28 los<8 weeks   |
| No  | No  | 49 los<8 weeks   |
| No  | Yes | 56 los>=8 weeks  |

|     |     |                  |
|-----|-----|------------------|
| No  | No  | 49 los<8 weeks   |
| No  | No  | 77 los>=8 weeks  |
| No  | No  | 84 los>=8 weeks  |
| No  | No  | 112 los>=8 weeks |
| No  | No  | 91 los>=8 weeks  |
| No  | No  | 56 los>=8 weeks  |
| No  | No  | 42 los<8 weeks   |
| No  | No  | 35 los<8 weeks   |
| No  | No  | 49 los<8 weeks   |
| No  | No  | 42 los<8 weeks   |
| No  | No  | 35 los<8 weeks   |
| No  | No  | 112 los>=8 weeks |
| Yes | Yes | 35 los<8 weeks   |
| No  | No  | 91 los>=8 weeks  |
| No  | No  | 63 los>=8 weeks  |
| No  | No  | 77 los>=8 weeks  |
| No  | No  | 91 los>=8 weeks  |
| No  | No  | 49 los<8 weeks   |
| No  | No  | 105 los>=8 weeks |
| No  | No  | 112 los>=8 weeks |
| No  | No  | 56 los>=8 weeks  |
| No  | No  | 49 los<8 weeks   |
| No  | No  | 42 los<8 weeks   |
| No  | No  | 28 los<8 weeks   |
| No  | No  | 91 los>=8 weeks  |
| No  | No  | 112 los>=8 weeks |
| No  | No  | 112 los>=8 weeks |
| No  | No  | 21 los<8 weeks   |
| No  | No  | 70 los>=8 weeks  |
| No  | No  | 56 los>=8 weeks  |
| No  | No  | 35 los<8 weeks   |
| No  | No  | 84 los>=8 weeks  |
| No  | No  | 42 los<8 weeks   |
| No  | No  | 0                |
| No  | No  | 105 los>=8 weeks |
| No  | No  | 21 los<8 weeks   |
| No  | No  | 56 los>=8 weeks  |
| No  | No  | 42 los<8 weeks   |
| No  | No  | 35 los<8 weeks   |
| No  | No  | 42 los<8 weeks   |
| No  | No  | 28 los<8 weeks   |
| No  | No  | 112 los>=8 weeks |
| No  | No  | 42 los<8 weeks   |
| No  | No  | 35 los<8 weeks   |
| No  | No  | 21 los<8 weeks   |
| No  | No  | 105 los>=8 weeks |
| No  | No  | 105 los>=8 weeks |
| No  | No  | 91 los>=8 weeks  |
| No  | No  | 21 los<8 weeks   |
| No  | No  | 77 los>=8 weeks  |
| No  | No  | 56 los>=8 weeks  |

|     |     |                  |
|-----|-----|------------------|
| No  | No  | 42 los<8 weeks   |
| No  | No  | 28 los<8 weeks   |
| No  | No  | 49 los<8 weeks   |
| No  | Yes | 7 los<8 weeks    |
| No  | No  | 112 los>=8 weeks |
| No  | No  | 105 los>=8 weeks |
| No  | No  | 77 los>=8 weeks  |
| No  | No  | 49 los<8 weeks   |
| No  | No  | 7 los<8 weeks    |
| No  | No  | 7 los<8 weeks    |
| No  | No  | 63 los>=8 weeks  |
| No  | No  | 91 los>=8 weeks  |
| No  | No  | 91 los>=8 weeks  |
| No  | No  | 112 los>=8 weeks |
| No  | No  | 35 los<8 weeks   |
| No  | No  | 57 los>=8 weeks  |
| No  | No  | 77 los>=8 weeks  |
| No  | No  | 35 los<8 weeks   |
| No  | No  | 63 los>=8 weeks  |
| No  | No  | 49 los<8 weeks   |
| Yes | No  | 28 los<8 weeks   |
| No  | No  | 35 los<8 weeks   |
| Yes | No  | 35 los<8 weeks   |
| No  | No  | 105 los>=8 weeks |
| No  | No  | 105 los>=8 weeks |
| No  | No  | 91 los>=8 weeks  |
| No  | No  | 35 los<8 weeks   |
| Yes | No  | 112 los>=8 weeks |
| No  | No  | 91 los>=8 weeks  |
| No  | No  | 70 los>=8 weeks  |
| No  | No  | 98 los>=8 weeks  |
| No  | Yes | 21 los<8 weeks   |
| Yes | No  | 105 los>=8 weeks |
| No  | No  | 42 los<8 weeks   |
| No  | No  | 49 los<8 weeks   |
| No  | No  | 112 los>=8 weeks |
| No  | No  | 56 los>=8 weeks  |
| No  | No  | 105 los>=8 weeks |
| No  | No  | 42 los<8 weeks   |
| Yes | No  | 112 los>=8 weeks |
| No  | Yes | 49 los<8 weeks   |
| No  | No  | 28 los<8 weeks   |
| No  | No  | 112 los>=8 weeks |
| No  | No  | 112 los>=8 weeks |
| No  | No  | 21 los<8 weeks   |
| No  | No  | 84 los>=8 weeks  |
| No  | No  | 112 los>=8 weeks |
| No  | No  | 35 los<8 weeks   |
| No  | No  | 105 los>=8 weeks |
| No  | No  | 112 los>=8 weeks |
| No  | No  | 70 los>=8 weeks  |

|     |     |                  |
|-----|-----|------------------|
| No  | No  | 112 los>=8 weeks |
| No  | No  | 21 los<8 weeks   |
| No  | No  | 56 los>=8 weeks  |
| No  | Yes | 42 los<8 weeks   |
| No  | No  | 56 los>=8 weeks  |
| No  | No  | 91 los>=8 weeks  |
| No  | No  | 56 los>=8 weeks  |
| No  | No  | 77 los>=8 weeks  |
| No  | No  | 35 los<8 weeks   |
| No  | No  | 42 los<8 weeks   |
| No  | No  | 56 los>=8 weeks  |
| No  | No  | 28 los<8 weeks   |
| No  | No  | 112 los>=8 weeks |
| No  | No  | 35 los<8 weeks   |
| Yes | No  | 28 los<8 weeks   |
| No  | No  | 70 los>=8 weeks  |
| No  | No  | 49 los<8 weeks   |
| No  | No  | 56 los>=8 weeks  |
| No  | No  | 0                |
| Yes | No  | 0                |
| No  | No  | 84 los>=8 weeks  |
| No  | Yes | 70 los>=8 weeks  |
| Yes | No  | 49 los<8 weeks   |
| No  | No  | 49 los<8 weeks   |
| No  | Yes | 105 los>=8 weeks |
| No  | No  | 56 los>=8 weeks  |
| No  | No  | 63 los>=8 weeks  |
| No  | Yes | 49 los<8 weeks   |
| No  | No  | 84 los>=8 weeks  |
| No  | No  | 49 los<8 weeks   |
| No  | No  | 42 los<8 weeks   |
| No  | No  | 35 los<8 weeks   |
| No  | No  | 42 los<8 weeks   |
| No  | No  | 28 los<8 weeks   |
| No  | No  | 70 los>=8 weeks  |
| No  | Yes | 21 los<8 weeks   |
| No  | No  | 42 los<8 weeks   |
| No  | No  | 84 los>=8 weeks  |
| No  | No  | 14 los<8 weeks   |
| No  | No  | 35 los<8 weeks   |
| No  | Yes | 21 los<8 weeks   |
| No  | No  | 28 los<8 weeks   |
| No  | No  | 28 los<8 weeks   |
| No  | No  | 49 los<8 weeks   |
| No  | No  | 112 los>=8 weeks |
| No  | No  | 35 los<8 weeks   |
| No  | No  | 70 los>=8 weeks  |
| Yes | No  | 63 los>=8 weeks  |
| No  | No  | 112 los>=8 weeks |
| No  | No  | 112 los>=8 weeks |
| No  | No  | 35 los<8 weeks   |

|     |     |                  |
|-----|-----|------------------|
| No  | No  | 14 los<8 weeks   |
| No  | No  | 21 los<8 weeks   |
| No  | No  | 14 los<8 weeks   |
| No  | No  | 105 los>=8 weeks |
| No  | No  | 28 los<8 weeks   |
| No  | No  | 35 los<8 weeks   |
| Yes | No  | 112 los>=8 weeks |
| No  | No  | 84 los>=8 weeks  |
| No  | No  | 56 los>=8 weeks  |
| No  | No  | 112 los>=8 weeks |
| No  | No  | 49 los<8 weeks   |
| No  | No  | 70 los>=8 weeks  |
| No  | No  | 105 los>=8 weeks |
| No  | No  | 84 los>=8 weeks  |
| No  | No  | 56 los>=8 weeks  |
| No  | No  | 56 los>=8 weeks  |
| No  | Yes | 14 los<8 weeks   |
| No  | No  | 21 los<8 weeks   |
| No  | No  | 21 los<8 weeks   |
| No  | No  | 49 los<8 weeks   |
| No  | No  | 49 los<8 weeks   |
| No  | No  | 35 los<8 weeks   |
| No  | No  | 49 los<8 weeks   |
| No  | No  | 49 los<8 weeks   |
| No  | No  | 49 los<8 weeks   |
| No  | No  | 49 los<8 weeks   |
| No  | No  | 112 los>=8 weeks |
| No  | No  | 42 los<8 weeks   |
| No  | No  | 63 los>=8 weeks  |
| No  | No  | 105 los>=8 weeks |
| No  | No  | 42 los<8 weeks   |
| No  | No  | 21 los<8 weeks   |
| No  | No  | 28 los<8 weeks   |
| No  | No  | 98 los>=8 weeks  |
| No  | No  | 70 los>=8 weeks  |
| No  | Yes | 63 los>=8 weeks  |
| No  | No  | 98 los>=8 weeks  |
| No  | No  | 42 los<8 weeks   |
| No  | No  | 84 los>=8 weeks  |
| No  | No  | 84 los>=8 weeks  |
| Yes | No  | 49 los<8 weeks   |
| No  | No  | 105 los>=8 weeks |
| No  | No  | 42 los<8 weeks   |
| No  | No  | 42 los<8 weeks   |
| No  | No  | 42 los<8 weeks   |
| No  | No  | 49 los<8 weeks   |
| No  | No  | 91 los>=8 weeks  |
| No  | No  | 98 los>=8 weeks  |
| No  | Yes | 70 los>=8 weeks  |
| No  | No  | 112 los>=8 weeks |
| No  | No  | 49 los<8 weeks   |

|     |     |                  |
|-----|-----|------------------|
| Yes | No  | 35 los<8 weeks   |
| No  | No  | 14 los<8 weeks   |
| No  | No  | 77 los>=8 weeks  |
| No  | No  | 42 los<8 weeks   |
| Yes | No  | 35 los<8 weeks   |
| No  | No  | 21 los<8 weeks   |
| No  | No  | 21 los<8 weeks   |
| No  | No  | 70 los>=8 weeks  |
| No  | No  | 70 los>=8 weeks  |
| Yes | No  | 42 los<8 weeks   |
| No  | No  | 49 los<8 weeks   |
| No  | No  | 112 los>=8 weeks |
| No  | No  | 14 los<8 weeks   |
| No  | No  | 35 los<8 weeks   |
| No  | Yes | 112 los>=8 weeks |
| No  | Yes | 42 los<8 weeks   |
| No  | No  | 28 los<8 weeks   |
| No  | Yes | 112 los>=8 weeks |
| No  | No  | 42 los<8 weeks   |
| No  | No  | 21 los<8 weeks   |
| No  | No  | 28 los<8 weeks   |
| No  | No  | 28 los<8 weeks   |
| No  | No  | 28 los<8 weeks   |
| No  | No  | 77 los>=8 weeks  |
| No  | No  | 105 los>=8 weeks |
| No  | Yes | 35 los<8 weeks   |
| No  | No  | 28 los<8 weeks   |
| No  | No  | 21 los<8 weeks   |
| No  | No  | 49 los<8 weeks   |
| No  | No  | 28 los<8 weeks   |
| No  | No  | 56 los>=8 weeks  |
| No  | No  | 70 los>=8 weeks  |
| No  | No  | 35 los<8 weeks   |
| No  | No  | 84 los>=8 weeks  |
| No  | No  | 77 los>=8 weeks  |
| No  | No  | 77 los>=8 weeks  |
| No  | Yes | 28 los<8 weeks   |
| No  | No  | 35 los<8 weeks   |
| No  | No  | 42 los<8 weeks   |
| No  | No  | 42 los<8 weeks   |
| No  | No  | 42 los<8 weeks   |
| No  | No  | 35 los<8 weeks   |
| No  | No  | 63 los>=8 weeks  |
| No  | No  | 91 los>=8 weeks  |
| No  | No  | 56 los>=8 weeks  |
| No  | No  | 35 los<8 weeks   |
| Yes | No  | 63 los>=8 weeks  |
| No  | No  | 35 los<8 weeks   |
| No  | No  | 42 los<8 weeks   |
| No  | Yes | 105 los>=8 weeks |
| No  | No  | 112 los>=8 weeks |

|     |     |                  |
|-----|-----|------------------|
| No  | No  | 49 los<8 weeks   |
| No  | No  | 70 los>=8 weeks  |
| No  | Yes | 112 los>=8 weeks |
| No  | No  | 0                |
| No  | No  | 70 los>=8 weeks  |
| No  | No  | 0                |
| Yes | No  | 112 los>=8 weeks |
| No  | No  | 63 los>=8 weeks  |
| No  | No  | 57 los>=8 weeks  |
| Yes | No  | 49 los<8 weeks   |
| No  | No  | 56 los>=8 weeks  |
| No  | No  | 112 los>=8 weeks |
| No  | No  | 70 los>=8 weeks  |
| No  | Yes | 42 los<8 weeks   |
| No  | No  | 63 los>=8 weeks  |
| No  | No  | 91 los>=8 weeks  |
| No  | No  | 35 los<8 weeks   |
| No  | No  | 98 los>=8 weeks  |
| Yes | No  | 70 los>=8 weeks  |
| No  | No  | 70 los>=8 weeks  |
| Yes | Yes | 14 los<8 weeks   |
| No  | No  | 77 los>=8 weeks  |
| No  | No  | 112 los>=8 weeks |
| No  | No  | 35 los<8 weeks   |
| No  | No  | 28 los<8 weeks   |
| No  | No  | 42 los<8 weeks   |
| No  | Yes | 7 los<8 weeks    |
| No  | No  | 14 los<8 weeks   |
| No  | No  | 21 los<8 weeks   |
| No  | No  | 91 los>=8 weeks  |
| No  | No  | 70 los>=8 weeks  |
| No  | No  | 21 los<8 weeks   |
| No  | No  | 28 los<8 weeks   |
| No  | Yes | 112 los>=8 weeks |
| No  | No  | 56 los>=8 weeks  |
| No  | No  | 63 los>=8 weeks  |
| No  | Yes | 112 los>=8 weeks |
| No  | No  | 98 los>=8 weeks  |
| No  | No  | 42 los<8 weeks   |
| No  | No  | 84 los>=8 weeks  |
| Yes | No  | 49 los<8 weeks   |
| No  | No  | 42 los<8 weeks   |
| No  | No  | 14 los<8 weeks   |
| No  | Yes | 42 los<8 weeks   |
| No  | No  | 56 los>=8 weeks  |
| No  | No  | 0                |
| No  | No  | 49 los<8 weeks   |
| No  | No  | 49 los<8 weeks   |
| No  | No  | 56 los>=8 weeks  |
| No  | No  | 56 los>=8 weeks  |
| No  | No  | 56 los>=8 weeks  |

|    |     |                  |
|----|-----|------------------|
| No | No  | 28 los<8 weeks   |
| No | No  | 63 los>=8 weeks  |
| No | No  | 112 los>=8 weeks |
| No | No  | 42 los<8 weeks   |
| No | No  | 84 los>=8 weeks  |
| No | No  | 28 los<8 weeks   |
| No | No  | 112 los>=8 weeks |
| No | No  | 28 los<8 weeks   |
| No | No  | 84 los>=8 weeks  |
| No | No  | 63 los>=8 weeks  |
| No | No  | 77 los>=8 weeks  |
| No | No  | 112 los>=8 weeks |
| No | No  | 91 los>=8 weeks  |
| No | No  | 112 los>=8 weeks |
| No | No  | 98 los>=8 weeks  |
| No | No  | 91 los>=8 weeks  |
| No | Yes | 70 los>=8 weeks  |
| No | No  | 112 los>=8 weeks |
| No | No  | 84 los>=8 weeks  |
| No | No  | 28 los<8 weeks   |
| No | No  | 84 los>=8 weeks  |
| No | No  | 70 los>=8 weeks  |
| No | No  | 105 los>=8 weeks |
| No | No  | 63 los>=8 weeks  |
| No | No  | 70 los>=8 weeks  |
| No | No  | 63 los>=8 weeks  |
| No | No  | 56 los>=8 weeks  |
| No | No  | 56 los>=8 weeks  |
| No | No  | 84 los>=8 weeks  |
| No | Yes | 34 los<8 weeks   |
| No | No  | 98 los>=8 weeks  |
| No | No  | 105 los>=8 weeks |
| No | No  | 84 los>=8 weeks  |
| No | No  | 21 los<8 weeks   |
| No | No  | 49 los<8 weeks   |
| No | No  | 112 los>=8 weeks |
| No | No  | 70 los>=8 weeks  |
